# Supplementary material for: Structurally Diverse Diterpenes from the South China Sea Soft Coral Sarcophyton trocheliophorum
Source: MDPI journal article supplement (doi:10.3390/md21020069), 2023-01-20
Supplement: s1 [file s1]

# Structurally Diverse Diterpenes from the South China Sea Soft Coral *Sarcophyton trocheliophorum*

## Contents

|                                                                                                             |    |
|-------------------------------------------------------------------------------------------------------------|----|
| Figure S1. <sup>1</sup> H NMR spectrum (400 MHz) of compound 1 in CDCl <sub>3</sub> .....                   | 3  |
| Figure S2. <sup>13</sup> C NMR spectrum (125 MHz) of compound 1 in CDCl <sub>3</sub> .....                  | 3  |
| Figure S3. HSQC spectrum (500 MHz) of compound 1 in CDCl <sub>3</sub> .....                                 | 4  |
| Figure S4. HMBC spectrum (500 MHz) of compound 1 in CDCl <sub>3</sub> .....                                 | 4  |
| Figure S5. <sup>1</sup> H- <sup>1</sup> H COSY spectrum (500 MHz) of compound 1 in CDCl <sub>3</sub> .....  | 5  |
| Figure S6. NOESY spectrum (500 MHz) of compound 1 in CDCl <sub>3</sub> .....                                | 5  |
| Figure S7. HR-ESIMS of compound 1.....                                                                      | 6  |
| Figure S8. IR spectrum of compound 1.....                                                                   | 6  |
| Figure S9. <sup>1</sup> H NMR spectrum (400 MHz) of compound 3 in CDCl <sub>3</sub> .....                   | 7  |
| Figure S10. <sup>13</sup> C NMR spectrum (125 MHz) of compound 3 in CDCl <sub>3</sub> .....                 | 7  |
| Figure S11. HSQC spectrum (500 MHz) of compound 3 in CDCl <sub>3</sub> .....                                | 8  |
| Figure S12. HMBC spectrum (500 MHz) of compound 3 in CDCl <sub>3</sub> .....                                | 8  |
| Figure S13. <sup>1</sup> H- <sup>1</sup> H COSY spectrum (500 MHz) of compound 3 in CDCl <sub>3</sub> ..... | 9  |
| Figure S14. NOESY spectrum (500 MHz) of compound 3 in CDCl <sub>3</sub> .....                               | 9  |
| Figure S15. HR-ESIMS of compound 3.....                                                                     | 10 |
| Figure S16. IR spectrum of compound 3.....                                                                  | 10 |
| Figure S17. <sup>1</sup> H NMR spectrum (400 MHz) of compound 5 in CDCl <sub>3</sub> .....                  | 11 |
| Figure S18. <sup>13</sup> C NMR spectrum (125 MHz) of compound 5 in CDCl <sub>3</sub> .....                 | 11 |
| Figure S19. HSQC spectrum (500 MHz) of compound 5 in CDCl <sub>3</sub> .....                                | 12 |
| Figure S20. HMBC spectrum (500 MHz) of compound 5 in CDCl <sub>3</sub> .....                                | 12 |
| Figure S21. <sup>1</sup> H- <sup>1</sup> H COSY spectrum (500 MHz) of compound 5 in CDCl <sub>3</sub> ..... | 13 |
| Figure S22. NOESY spectrum (500 MHz) of compound 5 in CDCl <sub>3</sub> .....                               | 13 |
| Figure S23. HR-ESIMS of compound 5.....                                                                     | 14 |
| Figure S24. IR spectrum of compound 5.....                                                                  | 14 |
| Figure S25. <sup>1</sup> H NMR spectrum (400 MHz) of compound 6 in CDCl <sub>3</sub> .....                  | 15 |
| Figure S26. <sup>13</sup> C NMR spectrum (125 MHz) of compound 6 in CDCl <sub>3</sub> .....                 | 15 |
| Figure S27. HSQC spectrum (500 MHz) of compound 6 in CDCl <sub>3</sub> .....                                | 16 |
| Figure S28. HMBC spectrum (500 MHz) of compound 6 in CDCl <sub>3</sub> .....                                | 16 |
| Figure S29. <sup>1</sup> H- <sup>1</sup> H COSY spectrum (500 MHz) of compound 6 in CDCl <sub>3</sub> ..... | 17 |
| Figure S30. NOESY spectrum (500 MHz) of compound 6 in CDCl <sub>3</sub> .....                               | 17 |
| Figure S31. HR-ESIMS of compound 6.....                                                                     | 18 |
| Figure S32. IR spectrum of compound 6.....                                                                  | 18 |
| Figure S33. <sup>1</sup> H NMR spectrum (400 MHz) of compound 7 in CDCl <sub>3</sub> .....                  | 19 |
| Figure S34. <sup>13</sup> C NMR spectrum (125 MHz) of compound 7 in CDCl <sub>3</sub> .....                 | 19 |
| Figure S35. HSQC spectrum (500 MHz) of compound 7 in CDCl <sub>3</sub> .....                                | 20 |
| Figure S36. HMBC spectrum (500 MHz) of compound 7 in CDCl <sub>3</sub> .....                                | 20 |
| Figure S37. <sup>1</sup> H- <sup>1</sup> H COSY spectrum (500 MHz) of compound 7 in CDCl <sub>3</sub> ..... | 21 |

|                                                                                                                                                                                                                                                                                                                                                                                                                            |     |
|----------------------------------------------------------------------------------------------------------------------------------------------------------------------------------------------------------------------------------------------------------------------------------------------------------------------------------------------------------------------------------------------------------------------------|-----|
| Figure S38. NOESY spectrum (500 MHz) of compound 7 in CDCl <sub>3</sub> .....                                                                                                                                                                                                                                                                                                                                              | 21  |
| Figure S39. HR-ESIMS of compound 7 .....                                                                                                                                                                                                                                                                                                                                                                                   | 22  |
| Figure S40. IR spectrum of compound 7 .....                                                                                                                                                                                                                                                                                                                                                                                | 22  |
| Figure S41. <sup>1</sup> H NMR spectrum (400 MHz) of compound 8 in CDCl <sub>3</sub> .....                                                                                                                                                                                                                                                                                                                                 | 23  |
| Figure S42. <sup>13</sup> C NMR spectrum (125 MHz) of compound 8 in CDCl <sub>3</sub> .....                                                                                                                                                                                                                                                                                                                                | 23  |
| Figure S43. HSQC spectrum (500 MHz) of compound 8 in CDCl <sub>3</sub> .....                                                                                                                                                                                                                                                                                                                                               | 24  |
| Figure S44. HMBC spectrum (500 MHz) of compound 8 in CDCl <sub>3</sub> .....                                                                                                                                                                                                                                                                                                                                               | 24  |
| Figure S45. <sup>1</sup> H- <sup>1</sup> H COSY spectrum (500 MHz) of compound 8 in CDCl <sub>3</sub> .....                                                                                                                                                                                                                                                                                                                | 25  |
| Figure S46. NOESY spectrum (500 MHz) of compound 8 in CDCl <sub>3</sub> .....                                                                                                                                                                                                                                                                                                                                              | 25  |
| Figure S47. HR-ESIMS of compound 8 .....                                                                                                                                                                                                                                                                                                                                                                                   | 26  |
| Figure S48. IR spectrum of compound 8 .....                                                                                                                                                                                                                                                                                                                                                                                | 26  |
| Table S1. X-ray crystallographic data for compound 1 .....                                                                                                                                                                                                                                                                                                                                                                 | 26  |
| Table S2. X-ray crystallographic data for compound 4 .....                                                                                                                                                                                                                                                                                                                                                                 | 27  |
| Figure S49. Regression analysis of experimental vs calculated <sup>13</sup> C NMR chemical shifts of (2 <i>R</i> *, 3 <i>R</i> *, 13 <i>R</i> *, 14 <i>S</i> *)-5a, (2 <i>R</i> *, 3 <i>R</i> *, 13 <i>S</i> *, 14 <i>S</i> *)-5b, (2 <i>R</i> *, 3 <i>S</i> *, 13 <i>R</i> *, 14 <i>S</i> *)-5c, (2 <i>R</i> *, 3 <i>S</i> *, 13 <i>S</i> *, 14 <i>R</i> *)-5d at the PCM/mPW1PW91/6-31+G** level using DP4+ method ..... | 28  |
| Figure S50. Regression analysis of experimental vs calculated <sup>13</sup> C NMR chemical shifts of (1 <i>S</i> *, 4 <i>R</i> *, 10 <i>R</i> *)-7a, (1 <i>S</i> *, 4 <i>R</i> *, 10 <i>S</i> *)-7b, (1 <i>R</i> *, 4 <i>R</i> *, 10 <i>S</i> *)-7c, (1 <i>R</i> *, 4 <i>R</i> *, 10 <i>R</i> *)-7d at the PCM/mPW1PW91/6-31+G** level using DP4+ method .....                                                             | 29  |
| Table S3. Cartesian coordinates of all conformers of isomers 5a-5b used after optimization at the B3LYP/ 6-311G (d,p) level of theory as required for DP4+ analysis                                                                                                                                                                                                                                                        | 29  |
| Table S4.. DP4+ results obtained using experimental data of compound 5 <i>versus</i> isomers 5a-5d .....                                                                                                                                                                                                                                                                                                                   | 65  |
| Table S5. Cartesian coordinates of all conformers of isomers 7a-7b used after optimization at the B3LYP/ 6-311G (d,p) level of theory as required for DP4+ analysis                                                                                                                                                                                                                                                        | 66  |
| Table S6. DP4+ results obtained using experimental data of compound 7 <i>versus</i> isomers 7a-7d .....                                                                                                                                                                                                                                                                                                                    | 134 |

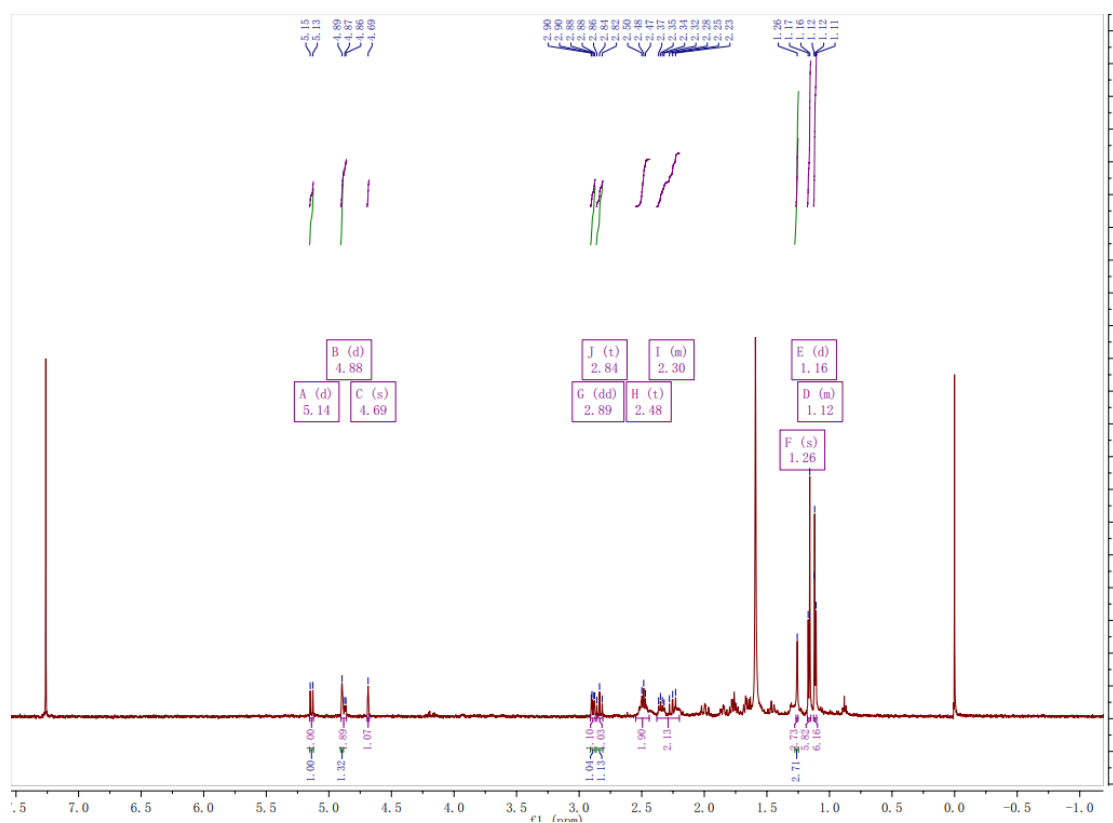

Figure S1. <sup>1</sup>H NMR spectrum (400 MHz) of compound 1 in CDCl<sub>3</sub>

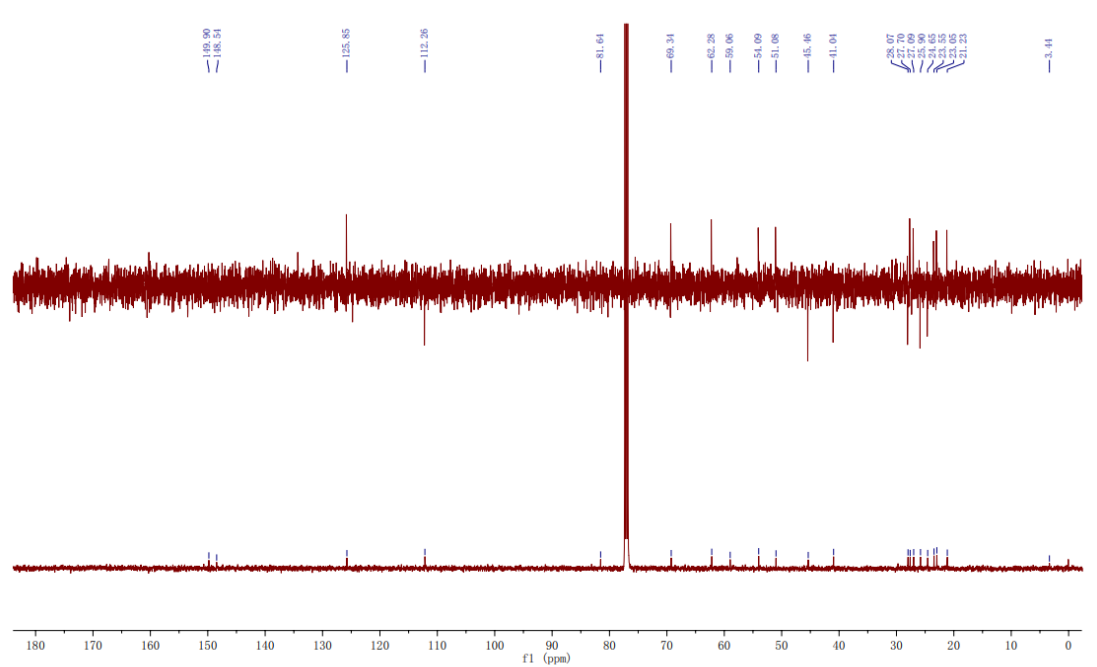

Figure S2. <sup>13</sup>C NMR spectrum (125 MHz) of compound 1 in CDCl<sub>3</sub>

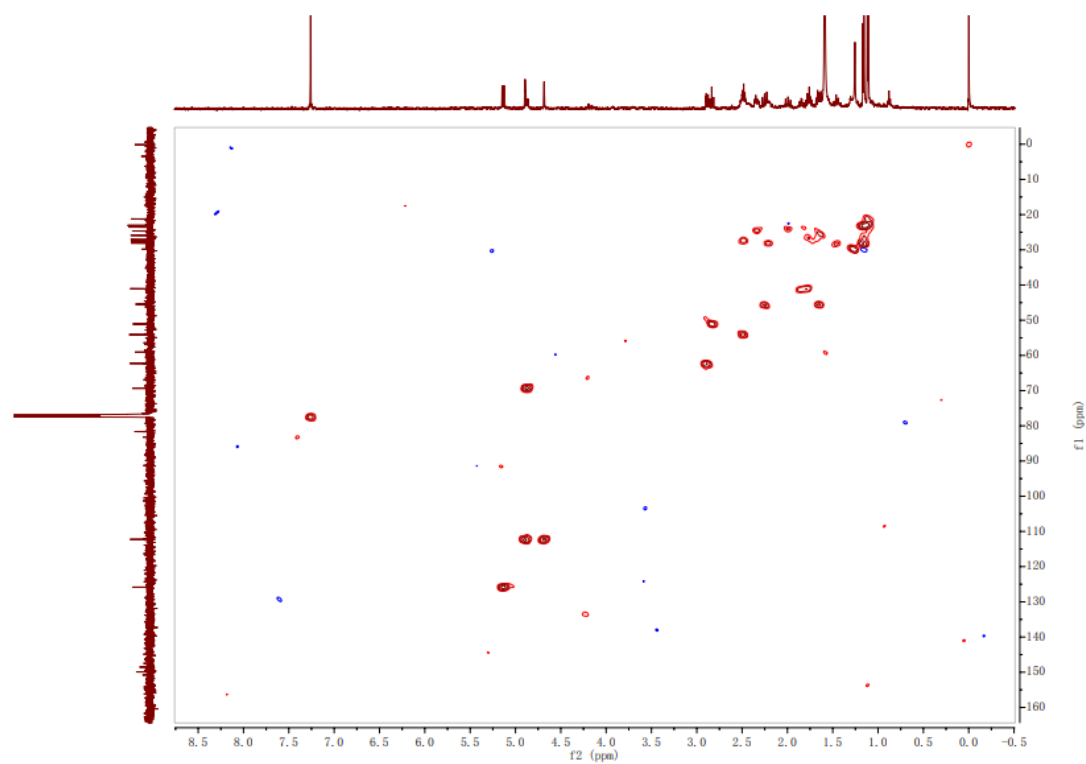

Figure S3. HSQC spectrum (500 MHz) of compound 1 in  $\text{CDCl}_3$

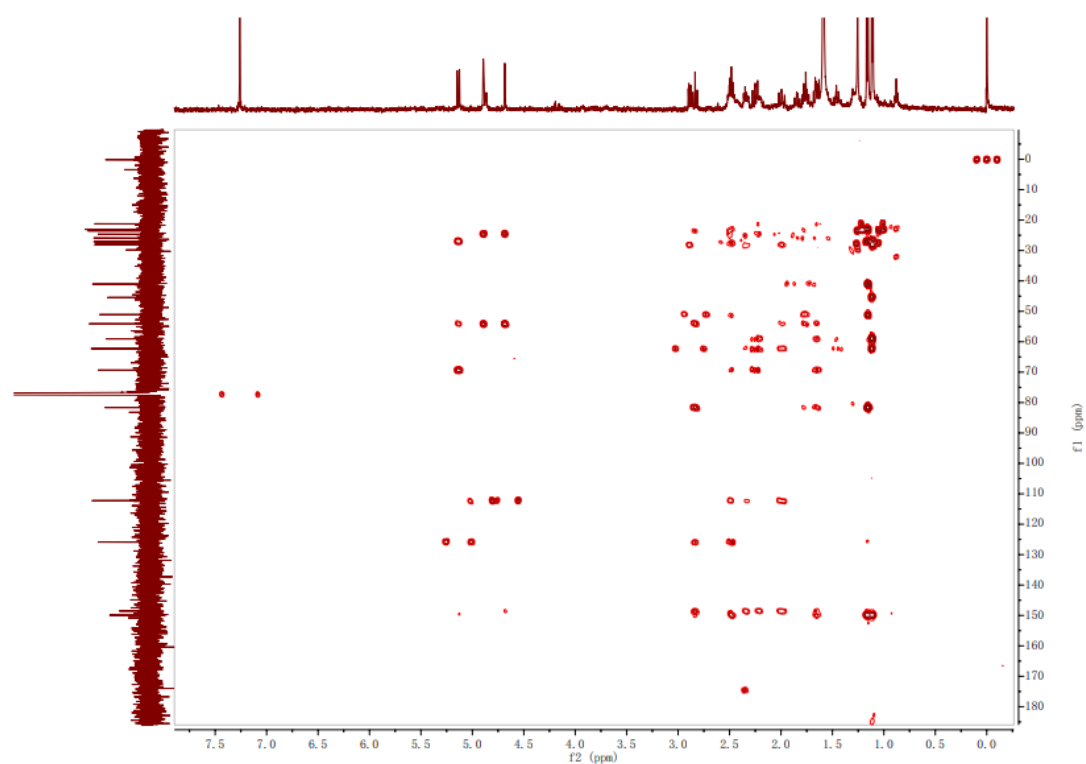

Figure S4. HMBC spectrum (500 MHz) of compound 1 in  $\text{CDCl}_3$

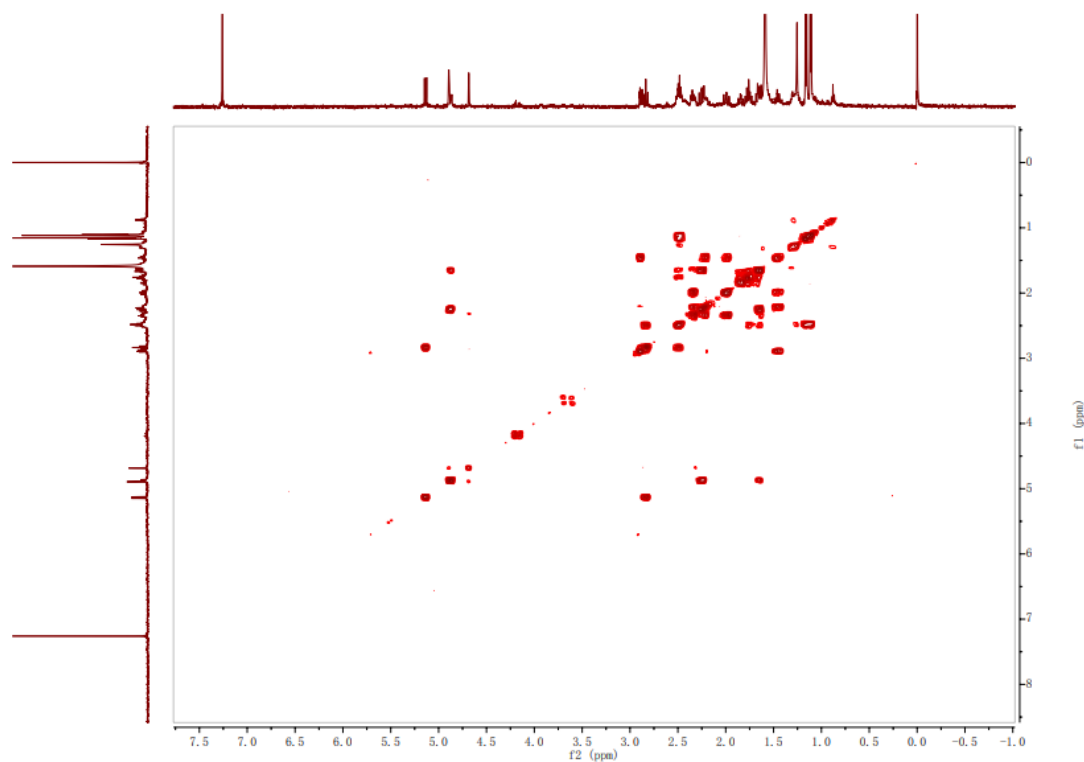

Figure S5.  $^1\text{H}$ - $^1\text{H}$  COSY spectrum (500 MHz) of compound 1 in  $\text{CDCl}_3$

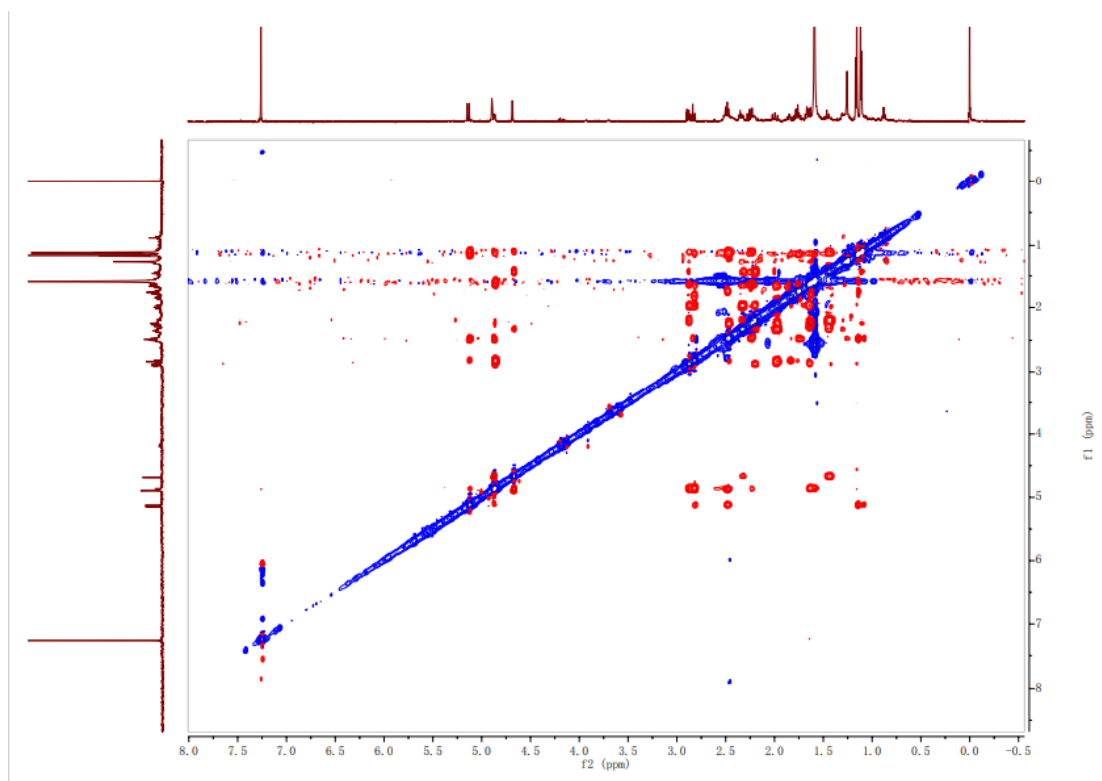

Figure S6. NOESY spectrum (500 MHz) of compound 1 in  $\text{CDCl}_3$

## Qualitative Analysis Report

|                 |                                        |                        |                             |
|-----------------|----------------------------------------|------------------------|-----------------------------|
| Data Filename   | ESI202105812.d                         | Sample Name            | A8-FCB-4                    |
| Sample ID       |                                        | Position               | P1-B2                       |
| Instrument Name | Agilent G6520 Q-TOF                    | Acq Method             | 20160322_MS_ESIH_POS_1min.m |
| Acquired Time   | 12/30/2021 15:45:49                    | IRM Calibration Status | Success                     |
| DA Method       | small molecular data analysis method.m | Comment                | ESIH by fangsu              |

### User Spectra

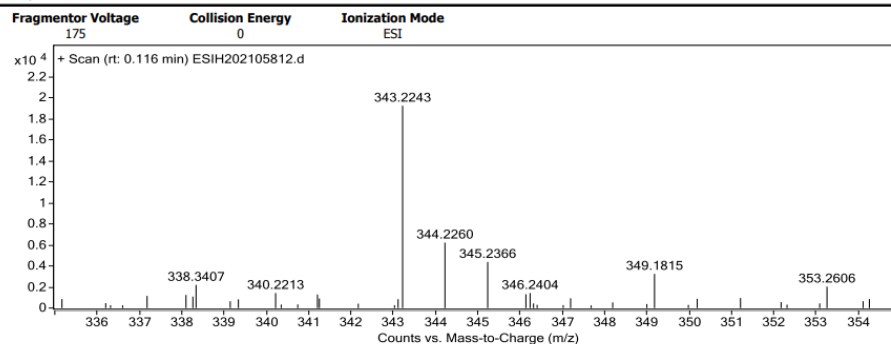

### Formula Calculator Results

| m/z      | Calc m/z | Diff (mDa) | Diff (ppm) | Ion Formula   | Ion     |
|----------|----------|------------|------------|---------------|---------|
| 343.2243 | 343.2244 | 0.07       | 0.22       | C20 H32 Na O3 | (M+Na)+ |

--- End Of Report ---

Figure S7. HR-ESIMS of compound 1

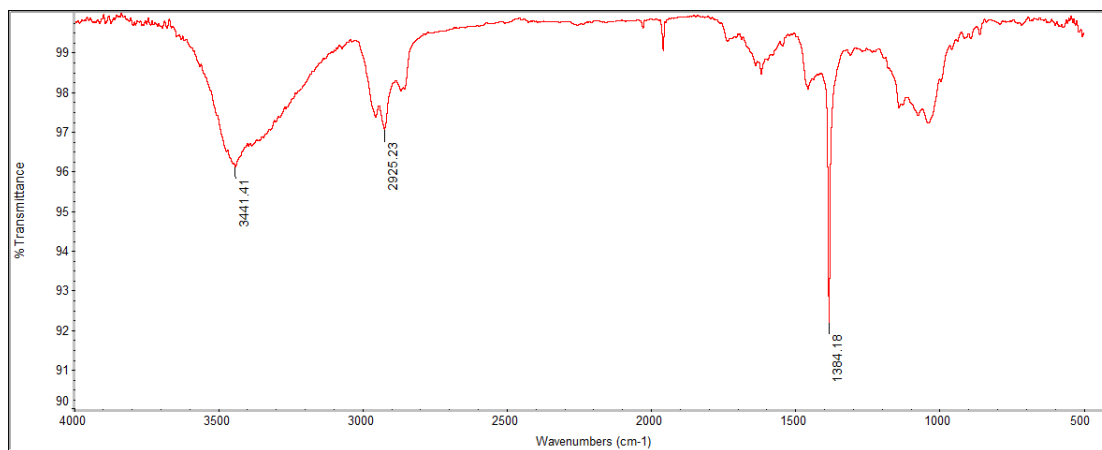

Figure S8. IR spectrum of compound 1

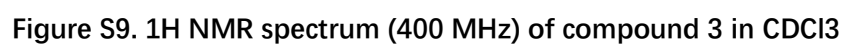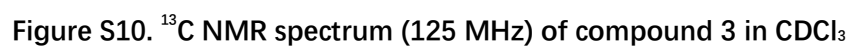

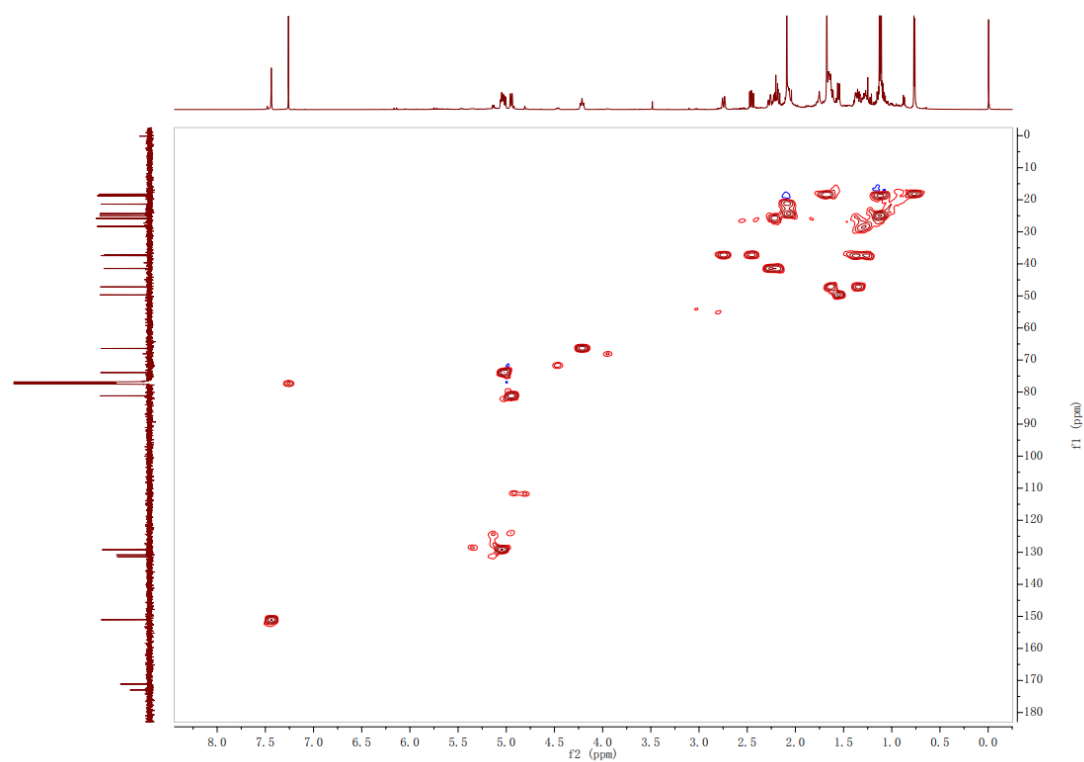

Figure S11. HSQC spectrum (500 MHz) of compound 3 in CDCl<sub>3</sub>

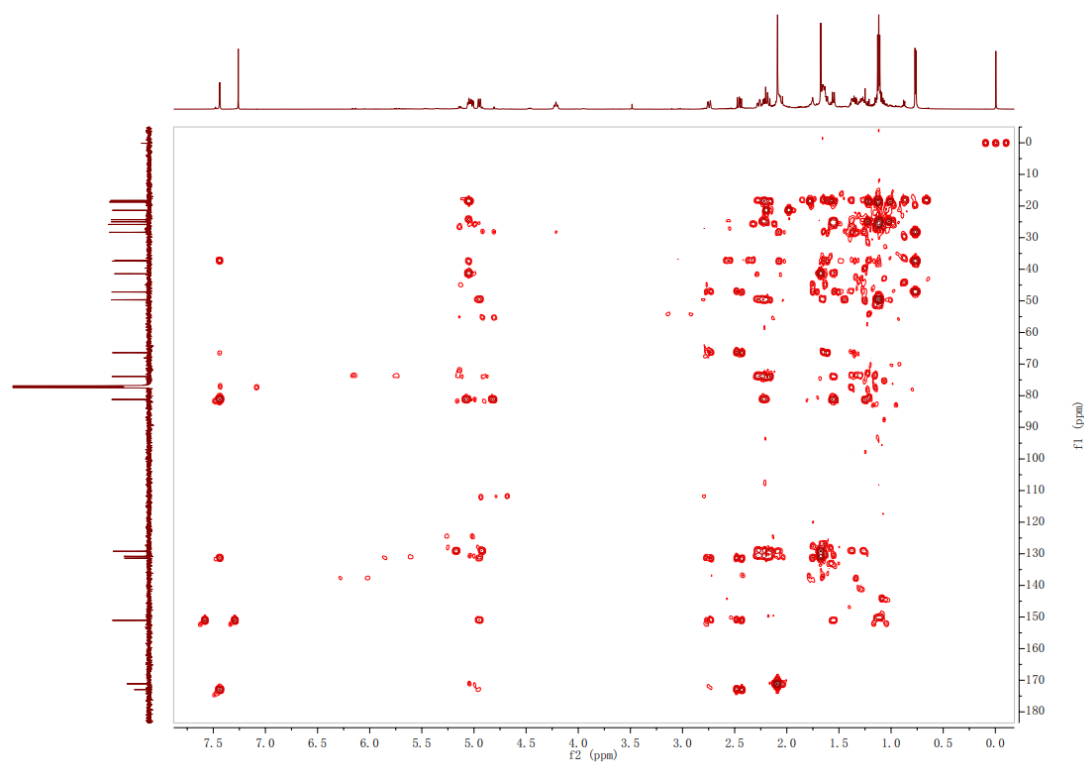

Figure S12. HMBC spectrum (500 MHz) of compound 3 in CDCl<sub>3</sub>



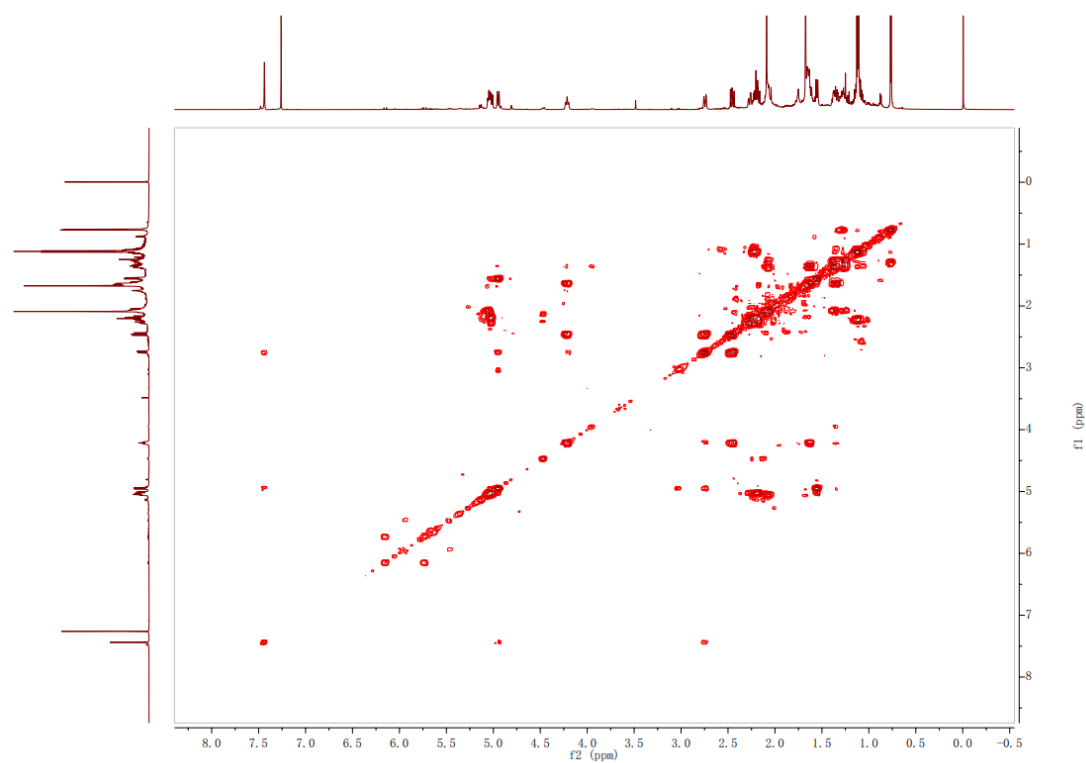

Figure S13.  $^1\text{H}$ - $^1\text{H}$  COSY spectrum (500 MHz) of compound 3 in  $\text{CDCl}_3$

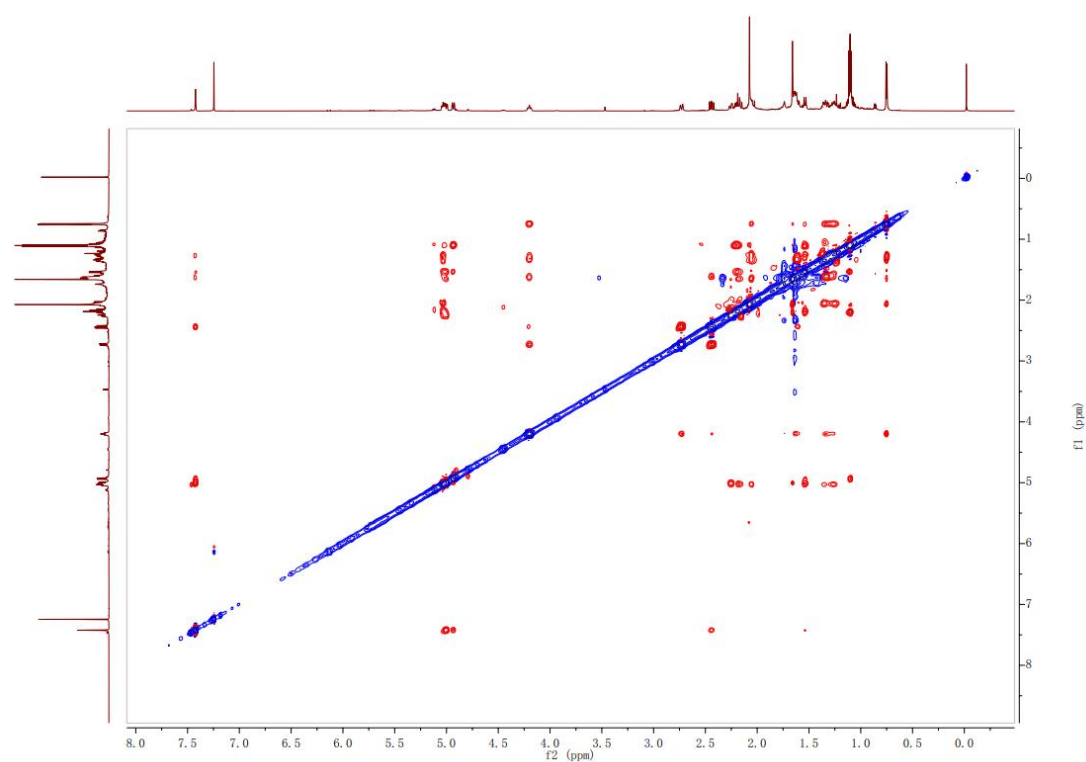

Figure S14. NOESY spectrum (500 MHz) of compound 3 in  $\text{CDCl}_3$

## Qualitative Analysis Report

|                        |                                        |                               |                             |
|------------------------|----------------------------------------|-------------------------------|-----------------------------|
| <b>Data Filename</b>   | ESI202105814.d                         | <b>Sample Name</b>            | A8-FDA-3                    |
| <b>Sample ID</b>       |                                        | <b>Position</b>               | P1-B4                       |
| <b>Instrument Name</b> | Agilent G6520 Q-TOF                    | <b>Acq Method</b>             | 20160322_MS_ESIH_POS_1min.m |
| <b>Acquired Time</b>   | 12/30/2021 14:34:46                    | <b>IRM Calibration Status</b> | Success                     |
| <b>DA Method</b>       | small molecular data analysis method.m | <b>Comment</b>                | ESIH by fangsuo             |

### User Spectra

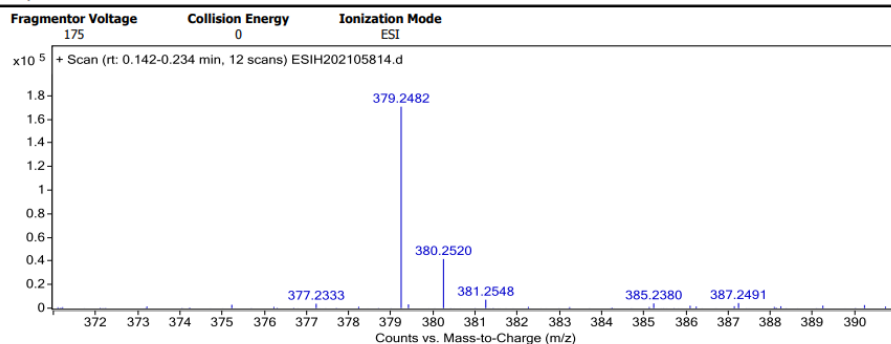

### Formula Calculator Results

| m/z      | Calc m/z | Diff (mDa) | Diff (ppm) | Ion Formula | Ion    |
|----------|----------|------------|------------|-------------|--------|
| 379.2482 | 379.2479 | -0.3       | -0.8       | C22 H35 O5  | (M+H)+ |

--- End Of Report ---

Figure S15. HR-ESIMS of compound 3

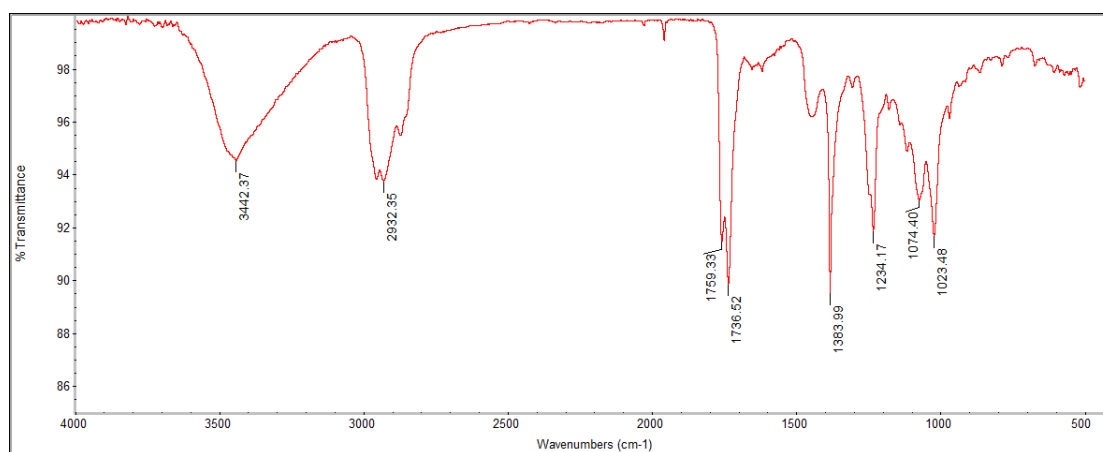

Figure S16. IR spectrum of compound 3

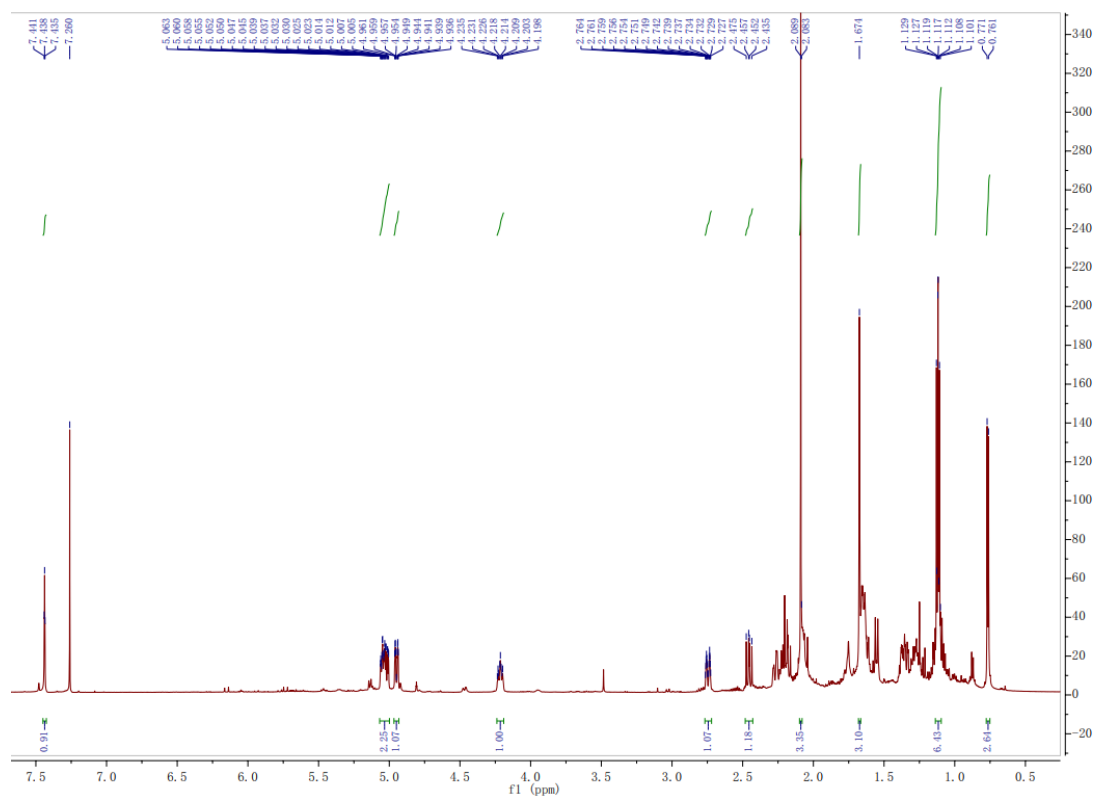

Figure S17.  $^1\text{H}$  NMR spectrum (400 MHz) of compound 5 in  $\text{CDCl}_3$

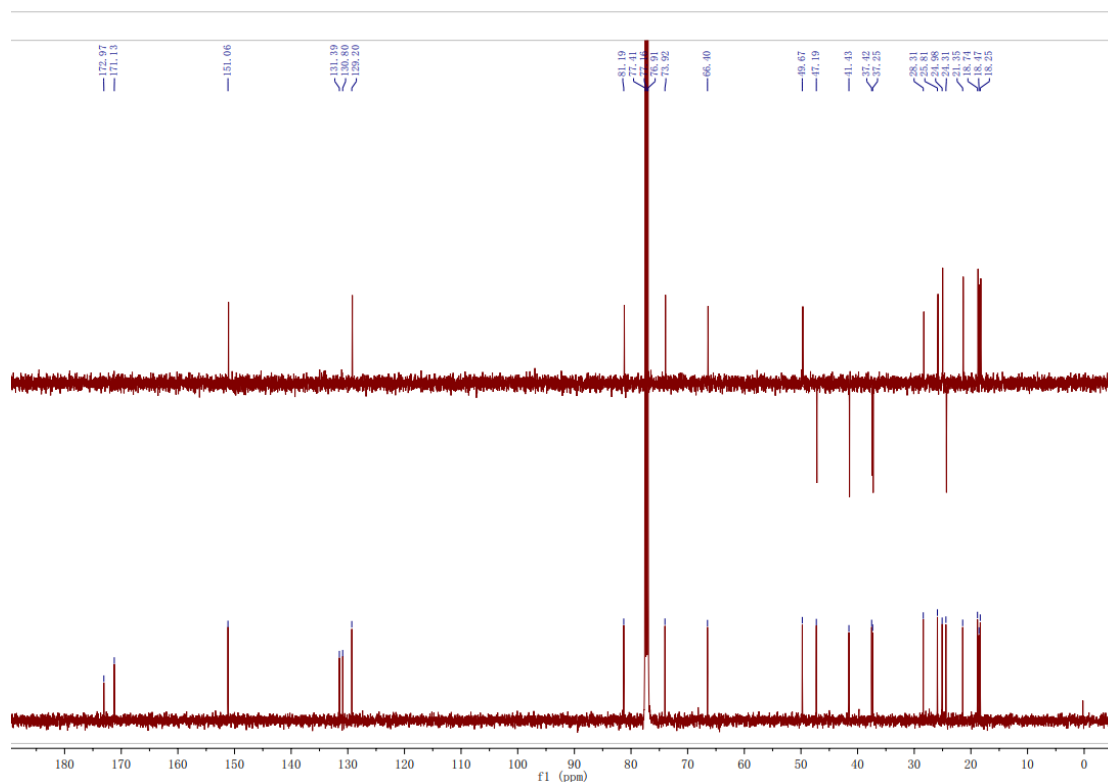

Figure S18.  $^{13}\text{C}$  NMR spectrum (125 MHz) of compound 5 in  $\text{CDCl}_3$

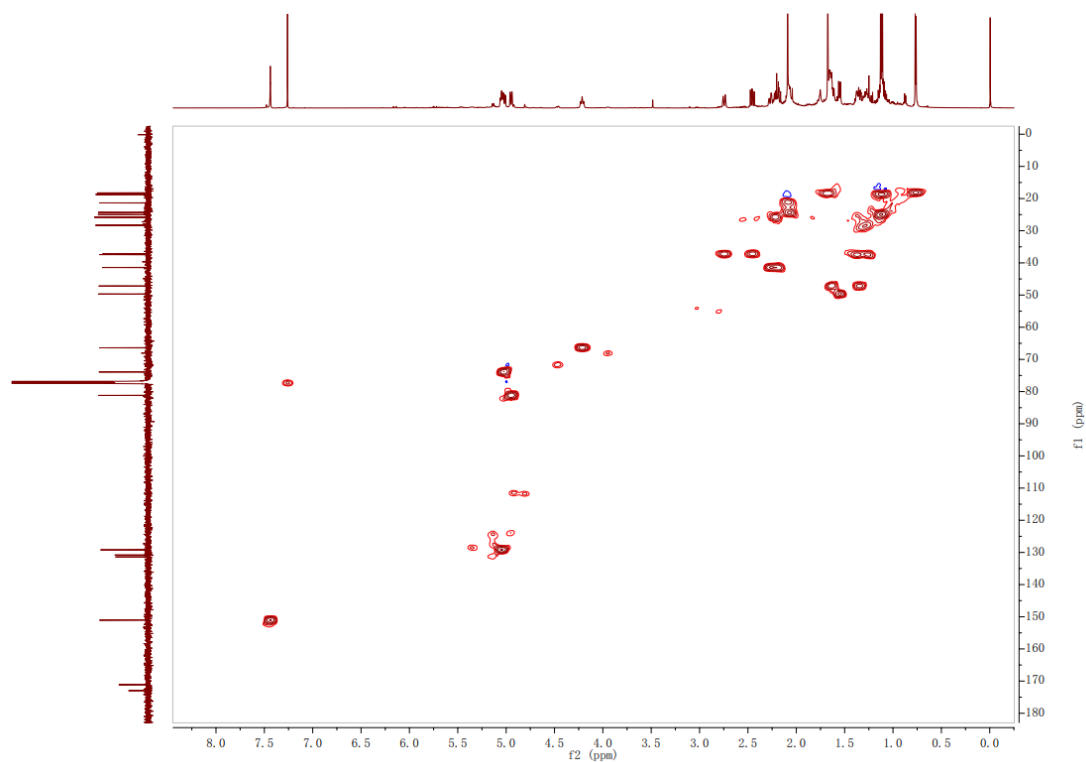

Figure S19. HSQC spectrum (500 MHz) of compound 5 in  $\text{CDCl}_3$

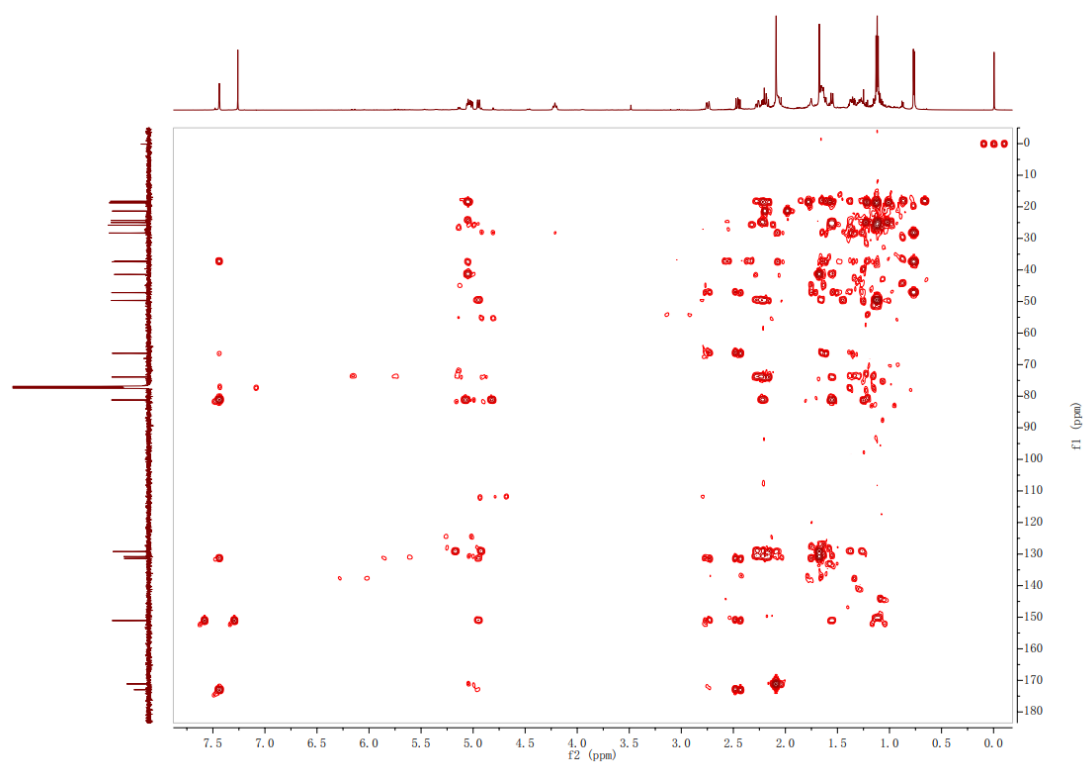

Figure S20. HMBC spectrum (500 MHz) of compound 5 in  $\text{CDCl}_3$

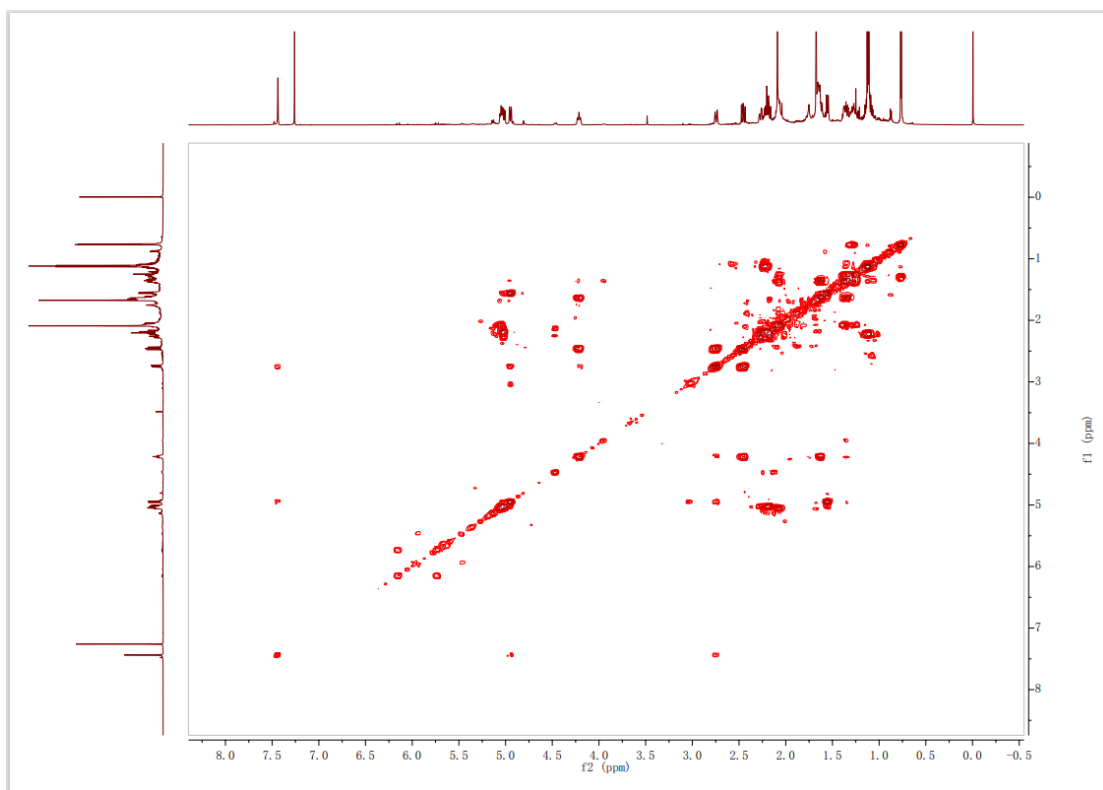

Figure S21.  $^1\text{H}$ - $^1\text{H}$  COSY spectrum (500 MHz) of compound 5 in  $\text{CDCl}_3$

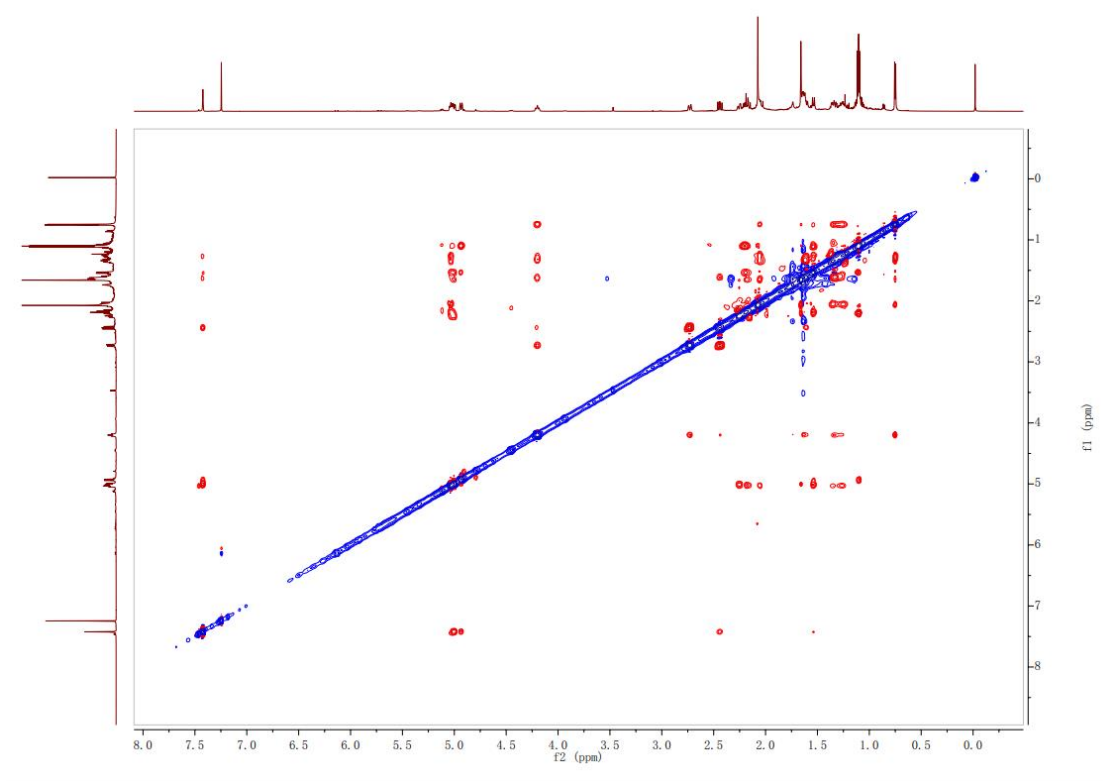

Figure S22. NOESY spectrum (500 MHz) of compound 5 in  $\text{CDCl}_3$

## Qualitative Analysis Report

|                        |                                        |                               |                             |
|------------------------|----------------------------------------|-------------------------------|-----------------------------|
| <b>Data Filename</b>   | ESI202105115.d                         | <b>Sample Name</b>            | A8-A8-EEA-5                 |
| <b>Sample ID</b>       |                                        | <b>Position</b>               | P1-A5                       |
| <b>Instrument Name</b> | Agilent G6520 Q-TOF                    | <b>Acq Method</b>             | 20160322_MS_ESIH_POS_1min.m |
| <b>Acquired Time</b>   | 11/22/2021 17:52:44                    | <b>IRM Calibration Status</b> | Success                     |
| <b>DA Method</b>       | small molecular data analysis method.m | <b>Comment</b>                | ESIH by fangsu              |

### User Spectra

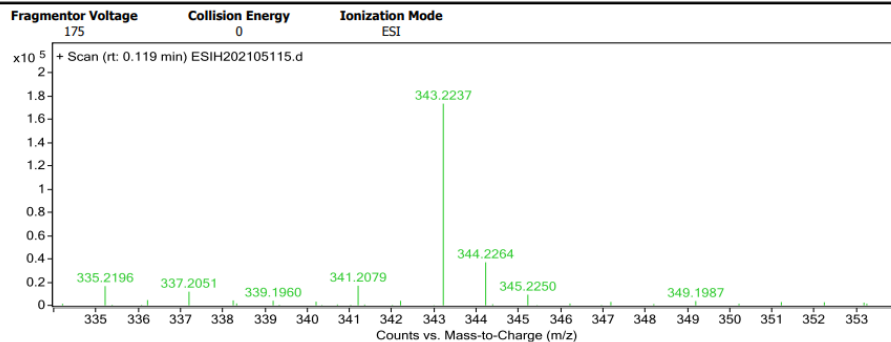

### Formula Calculator Results

| m/z      | Calc m/z | Diff (mDa) | Diff (ppm) | Ion Formula                                      | Ion     |
|----------|----------|------------|------------|--------------------------------------------------|---------|
| 343.2237 | 343.2244 | 0.71       | 2.05       | C <sub>20</sub> H <sub>32</sub> NaO <sub>3</sub> | (M+Na)+ |

--- End Of Report ---

Figure S23. HR-ESIMS of compound 5

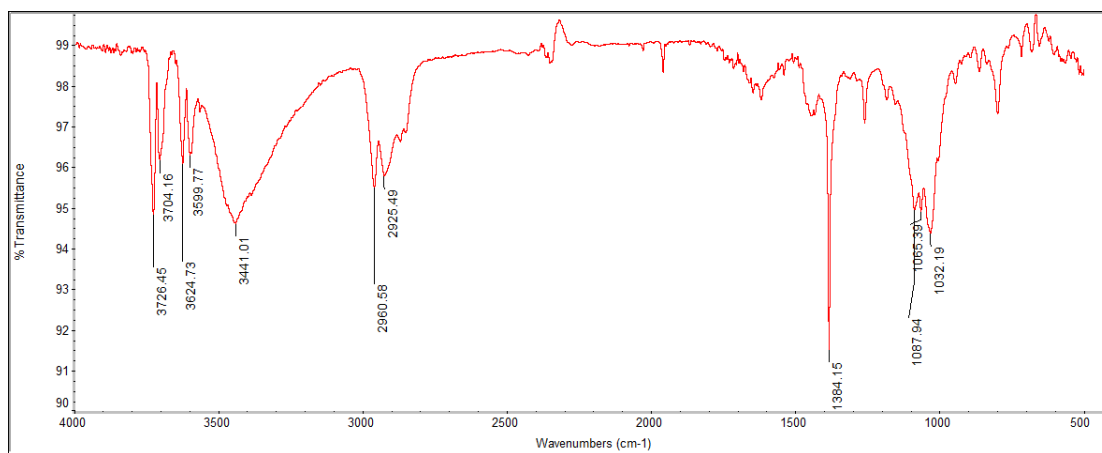

Figure S24. IR spectrum of compound 5

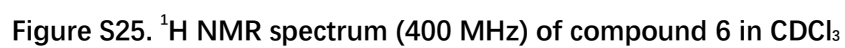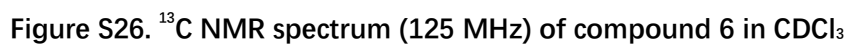

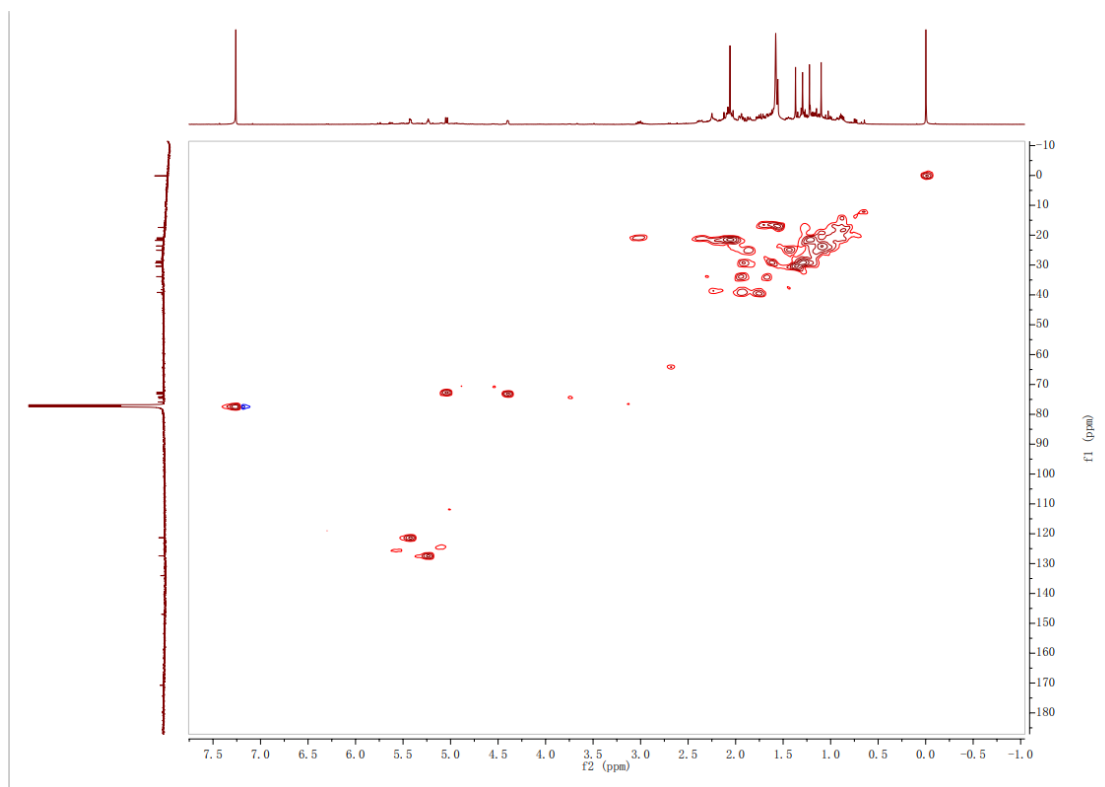

Figure S27. HSQC spectrum (500 MHz) of compound 6 in  $\text{CDCl}_3$

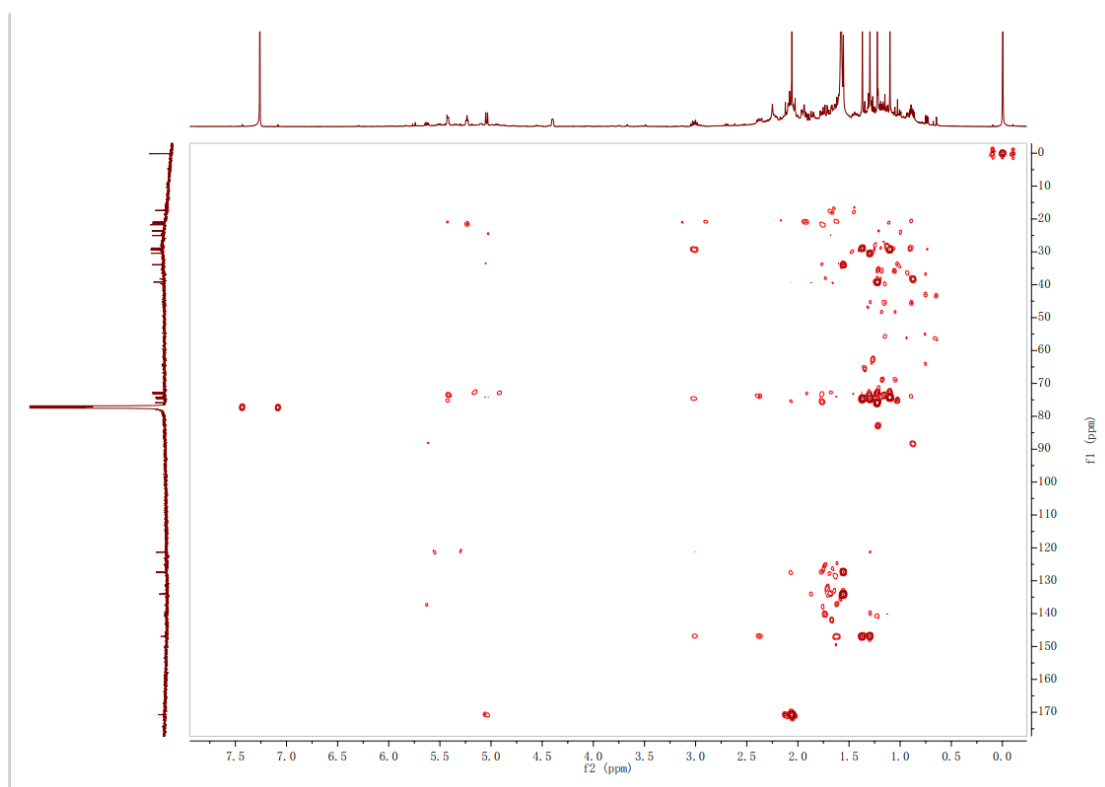

Figure S28. HMBC spectrum (500 MHz) of compound 6 in  $\text{CDCl}_3$



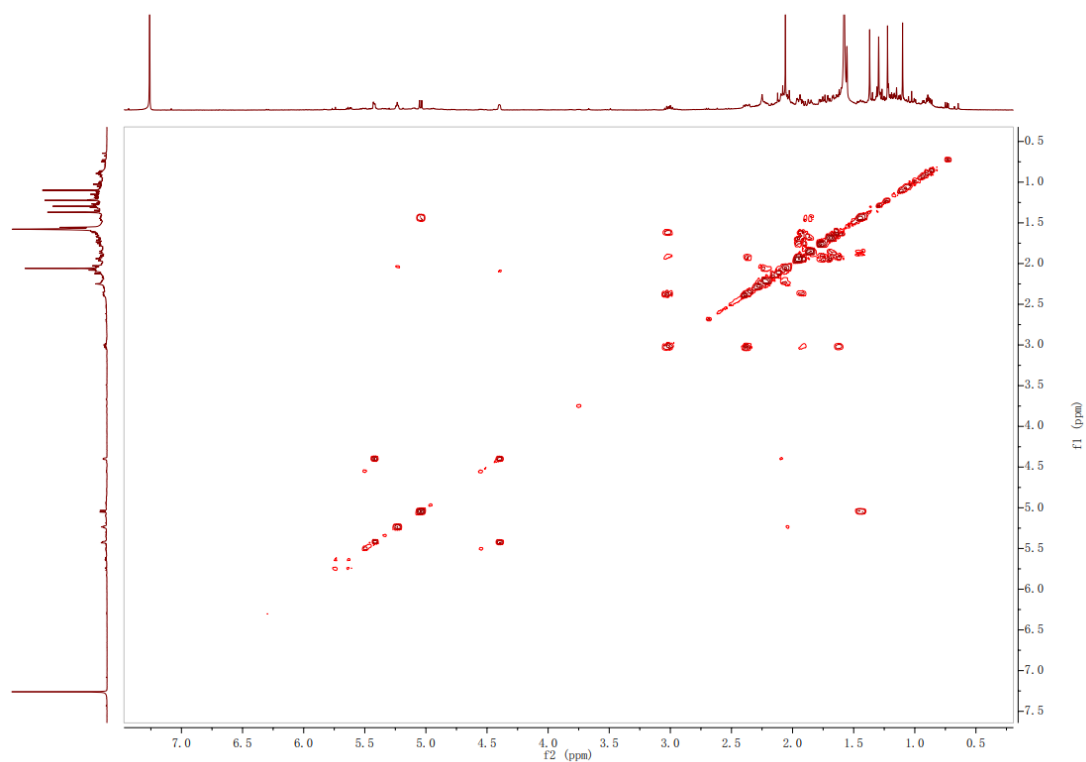

Figure S29.  $^1\text{H}$ - $^1\text{H}$  COSY spectrum (500 MHz) of compound 6 in  $\text{CDCl}_3$

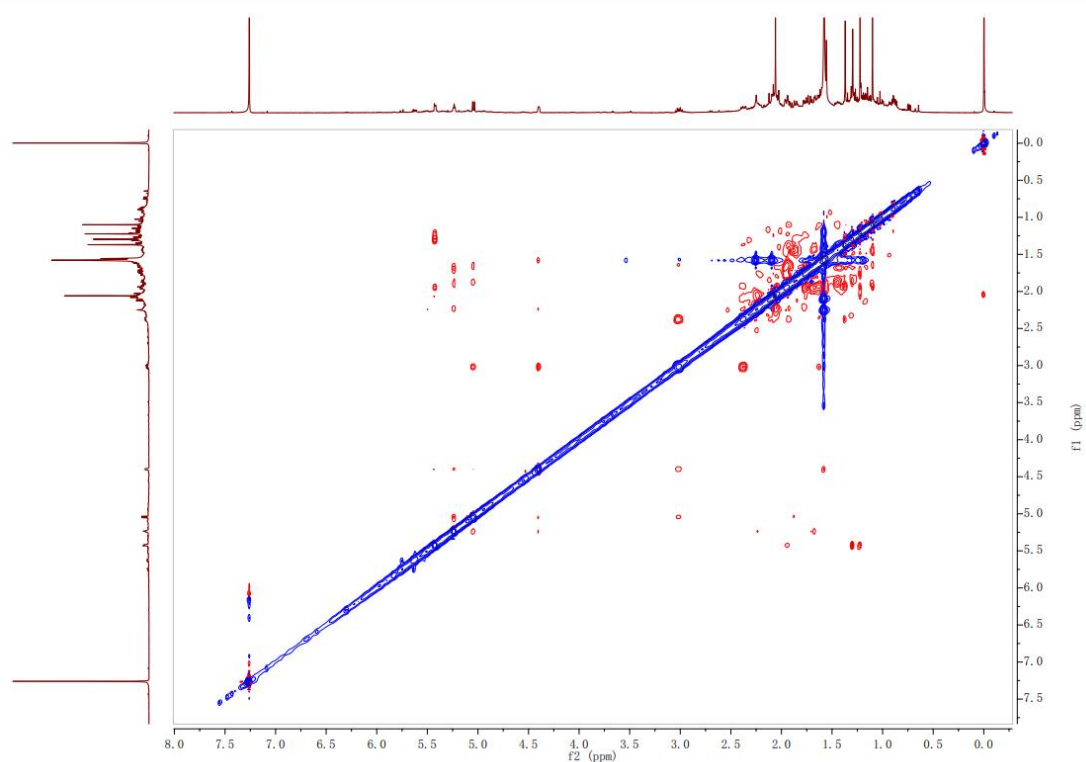

Figure S30. NOESY spectrum (500 MHz) of compound 6 in  $\text{CDCl}_3$

## Qualitative Analysis Report

|                        |                                        |                               |                             |
|------------------------|----------------------------------------|-------------------------------|-----------------------------|
| <b>Data Filename</b>   | ESI202105273-1.d                       | <b>Sample Name</b>            | A8-FCA-10                   |
| <b>Sample ID</b>       |                                        | <b>Position</b>               | P1-D9                       |
| <b>Instrument Name</b> | Agilent G6520 Q-TOF                    | <b>Acq Method</b>             | 20160322_MS_ESIH_POS_1min.m |
| <b>Acquired Time</b>   | 12/3/2021 18:22:56                     | <b>IRM Calibration Status</b> | Success                     |
| <b>DA Method</b>       | small molecular data analysis method.m | <b>Comment</b>                | ESI2 by fangsui             |

### User Spectra

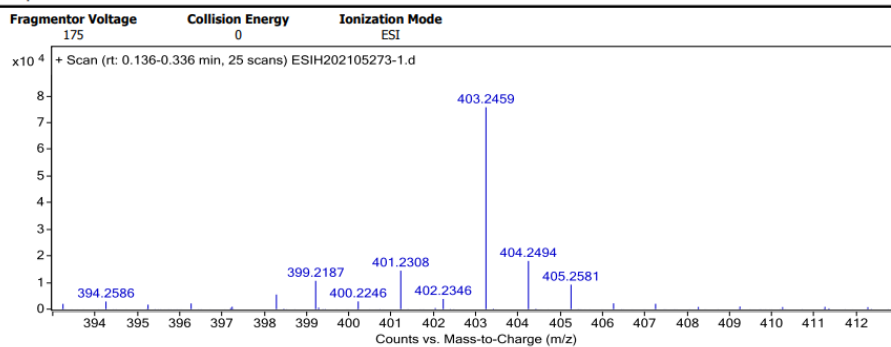

### Formula Calculator Results

| m/z      | Calc m/z | Diff (mDa) | Diff (ppm) | Ion Formula   | Ion     |
|----------|----------|------------|------------|---------------|---------|
| 403.2459 | 403.2455 | -0.4       | -1         | C22 H36 Na O5 | (M+Na)+ |

--- End Of Report ---

Figure S31. HR-ESIMS of compound 6

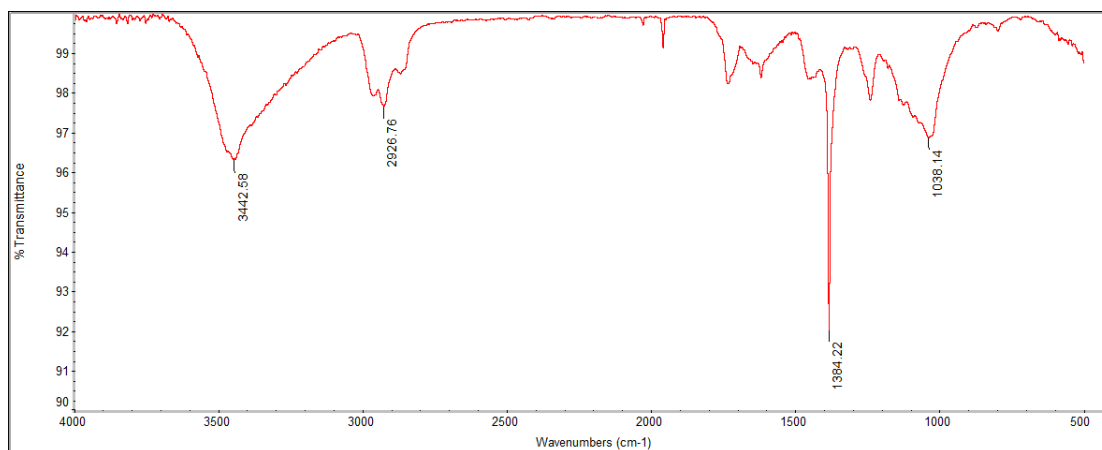

Figure S32. IR spectrum of compound 6

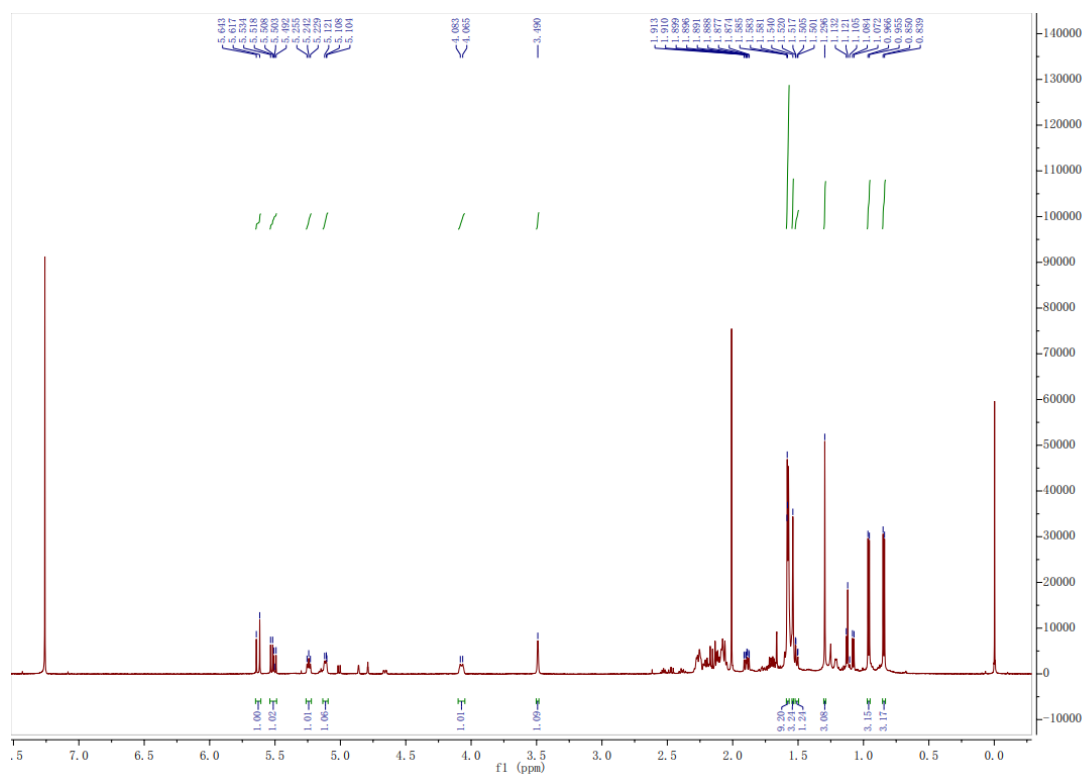

Figure S33.  $^1\text{H}$  NMR spectrum (400 MHz) of compound 7 in  $\text{CDCl}_3$

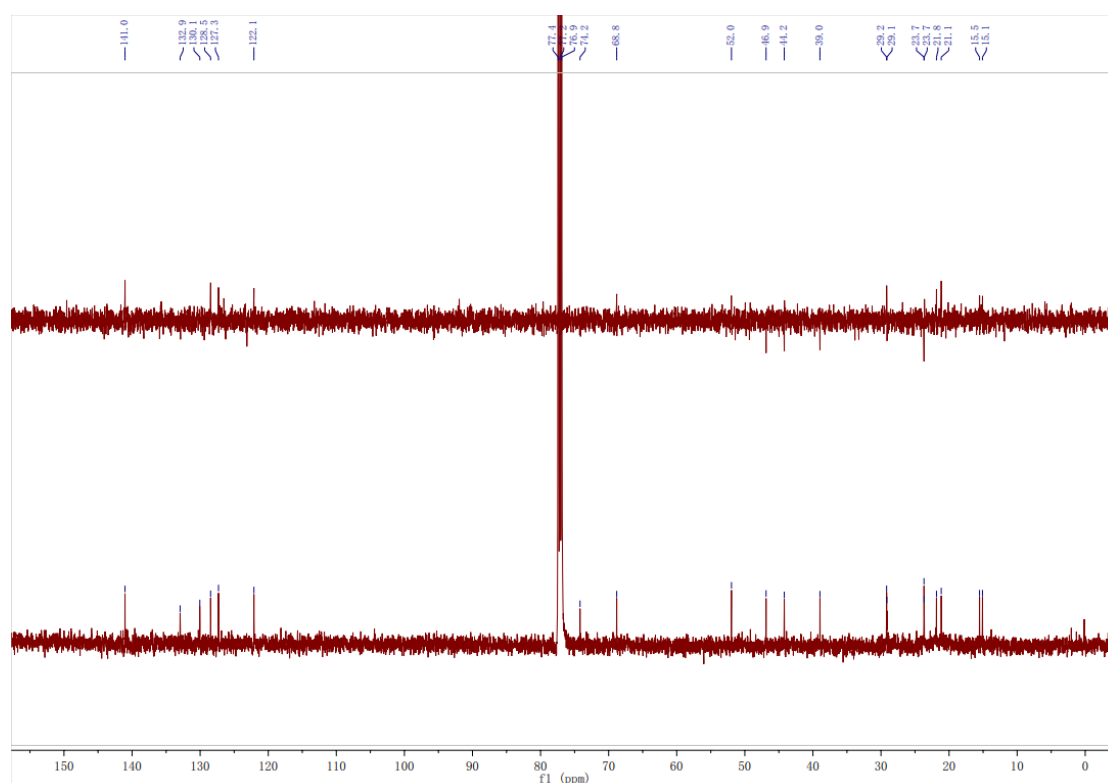

Figure S34.  $^{13}\text{C}$  NMR spectrum (125 MHz) of compound 7 in  $\text{CDCl}_3$

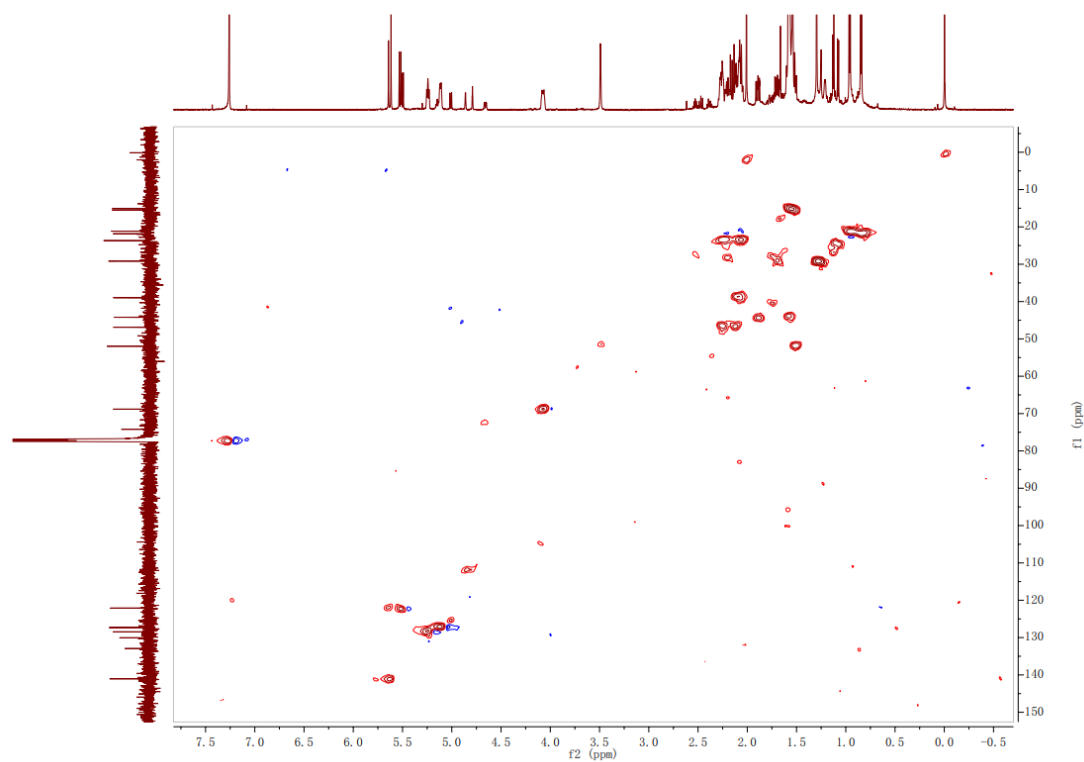

Figure S35. HSQC spectrum (500 MHz) of compound 7 in CDCl<sub>3</sub>

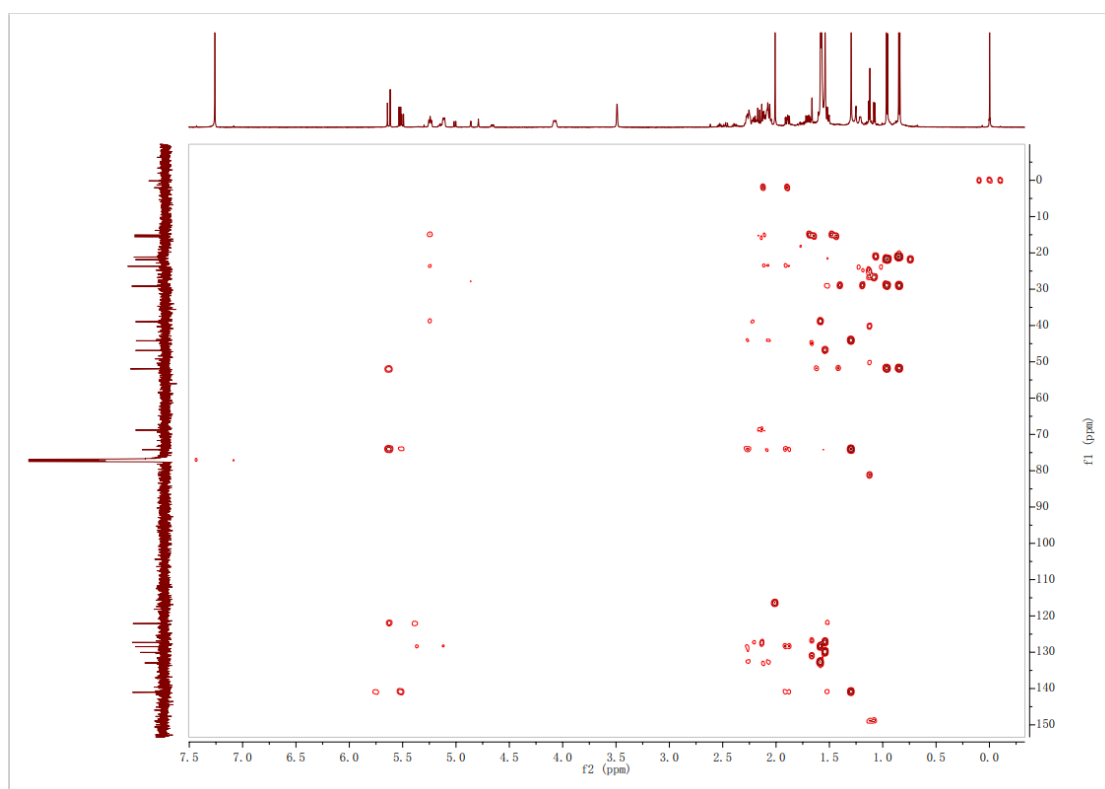

Figure S36. HMBC spectrum (500 MHz) of compound 7 in CDCl<sub>3</sub>

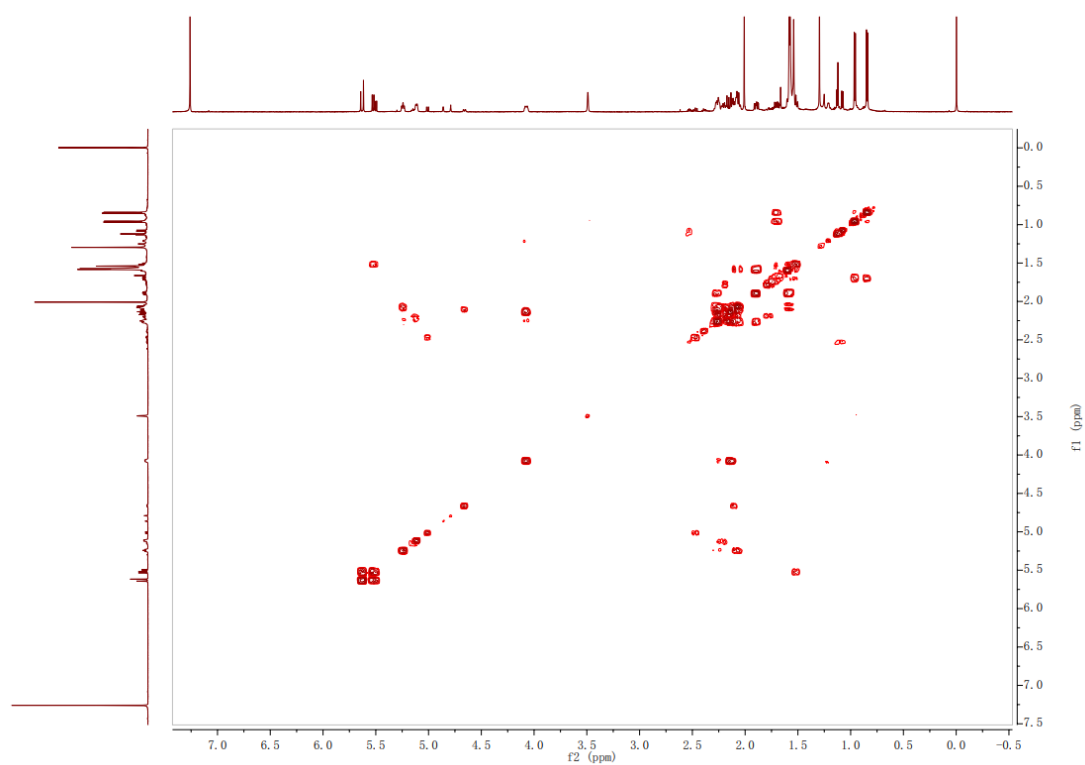

Figure S37.  $^1\text{H}$ - $^1\text{H}$  COSY spectrum (500 MHz) of compound 7 in  $\text{CDCl}_3$

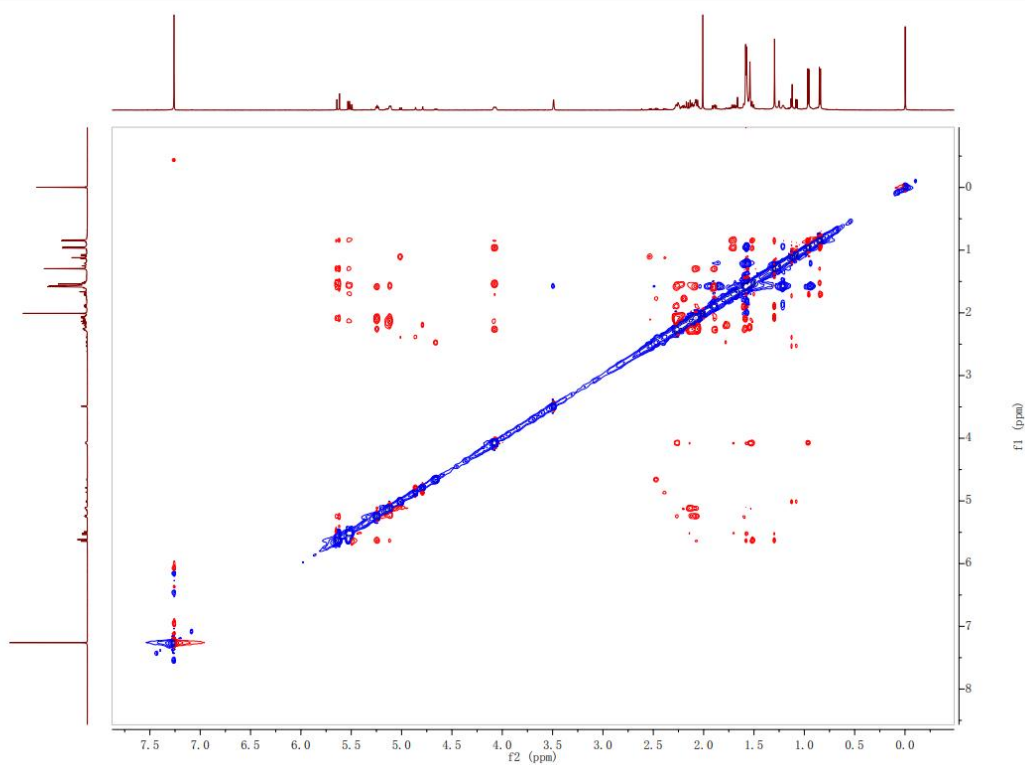

Figure S38. NOESY spectrum (500 MHz) of compound 7 in  $\text{CDCl}_3$

## Qualitative Analysis Report

|                        |                                        |                               |                             |
|------------------------|----------------------------------------|-------------------------------|-----------------------------|
| <b>Data Filename</b>   | ESI202105813.d                         | <b>Sample Name</b>            | A8-FCB-7                    |
| <b>Sample ID</b>       |                                        | <b>Position</b>               | P1-B3                       |
| <b>Instrument Name</b> | Agilent G6520 Q-TOF                    | <b>Acq Method</b>             | 20160322_MS_ESIH_POS_1min.m |
| <b>Acquired Time</b>   | 12/30/2021 14:33:30                    | <b>IRM Calibration Status</b> | Success                     |
| <b>DA Method</b>       | small molecular data analysis method.m | <b>Comment</b>                | ESIH by fangsu              |

### User Spectra

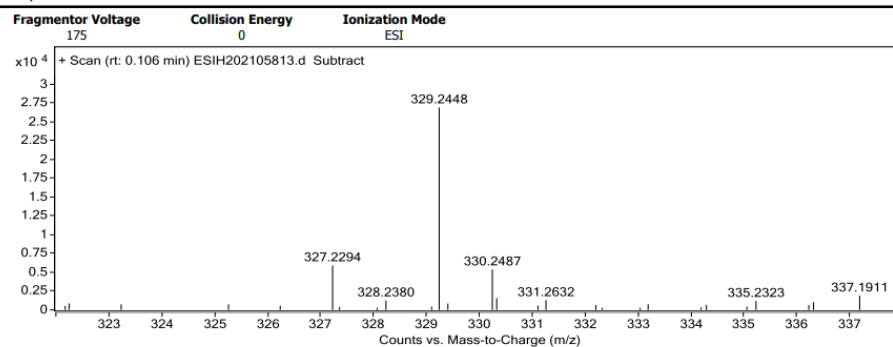

### Formula Calculator Results

| m/z      | Calc m/z | Diff (mDa) | Diff (ppm) | Ion Formula                                      | Ion                 |
|----------|----------|------------|------------|--------------------------------------------------|---------------------|
| 329.2448 | 329.2451 | 0.34       | 1.02       | C <sub>20</sub> H <sub>34</sub> NaO <sub>2</sub> | (M+Na) <sup>+</sup> |

--- End Of Report ---

Figure S39. HR-ESIMS of compound 7

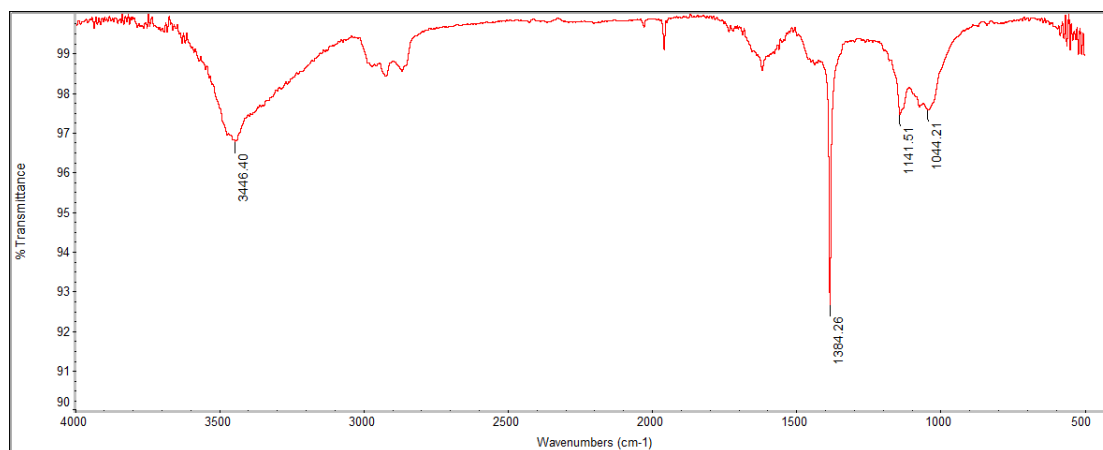

Figure S40. IR spectrum of compound 7

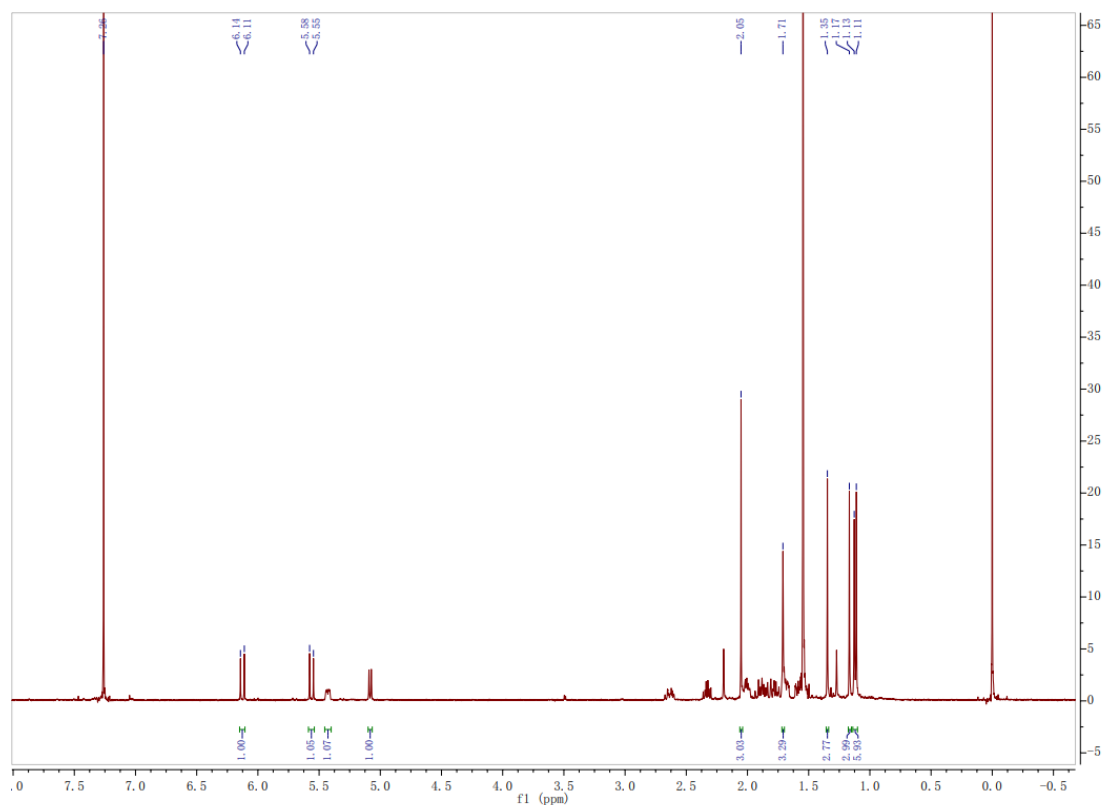

Figure S41. <sup>1</sup>H NMR spectrum (400 MHz) of compound 8 in CDCl<sub>3</sub>

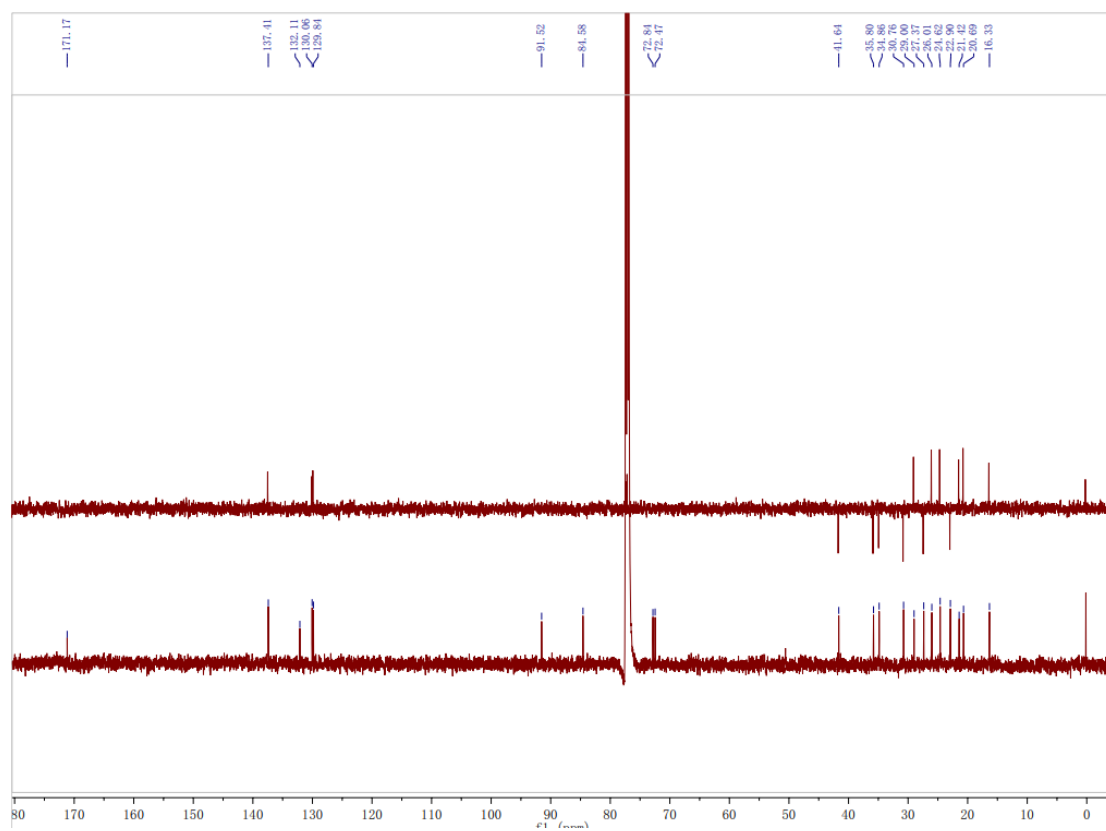

Figure S42. <sup>13</sup>C NMR spectrum (125 MHz) of compound 8 in CDCl<sub>3</sub>

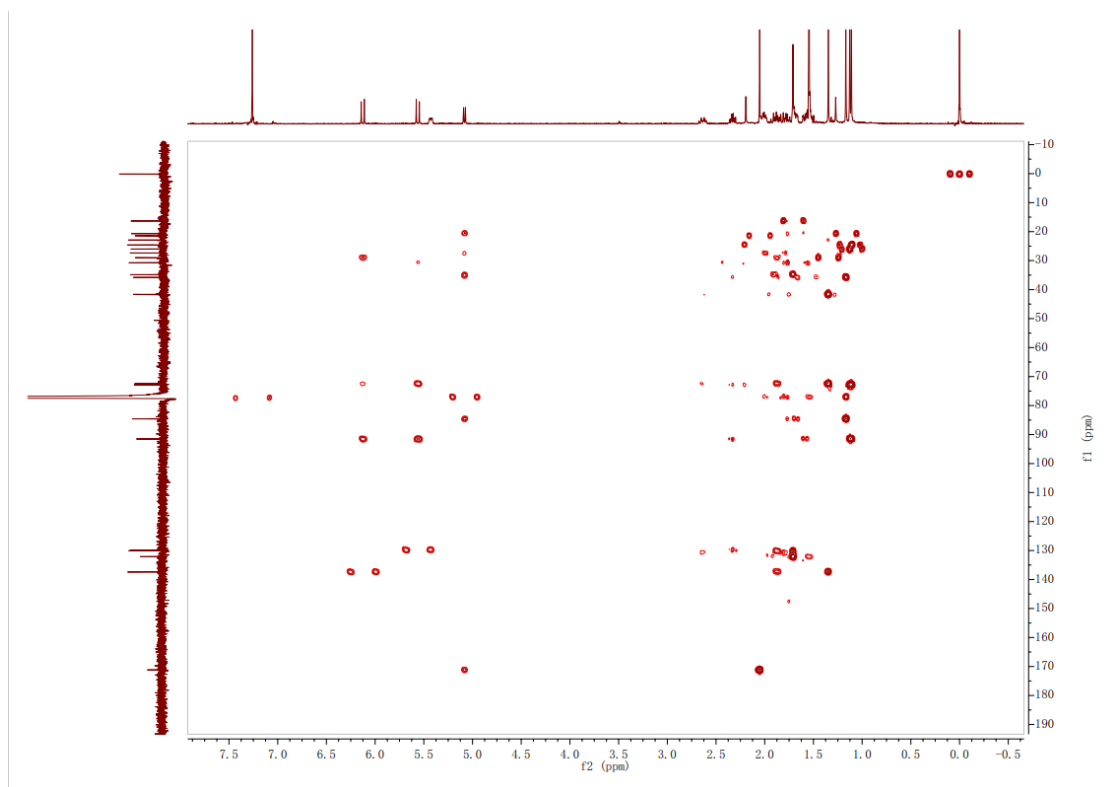

Figure S43. HSQC spectrum (500 MHz) of compound 8 in  $\text{CDCl}_3$

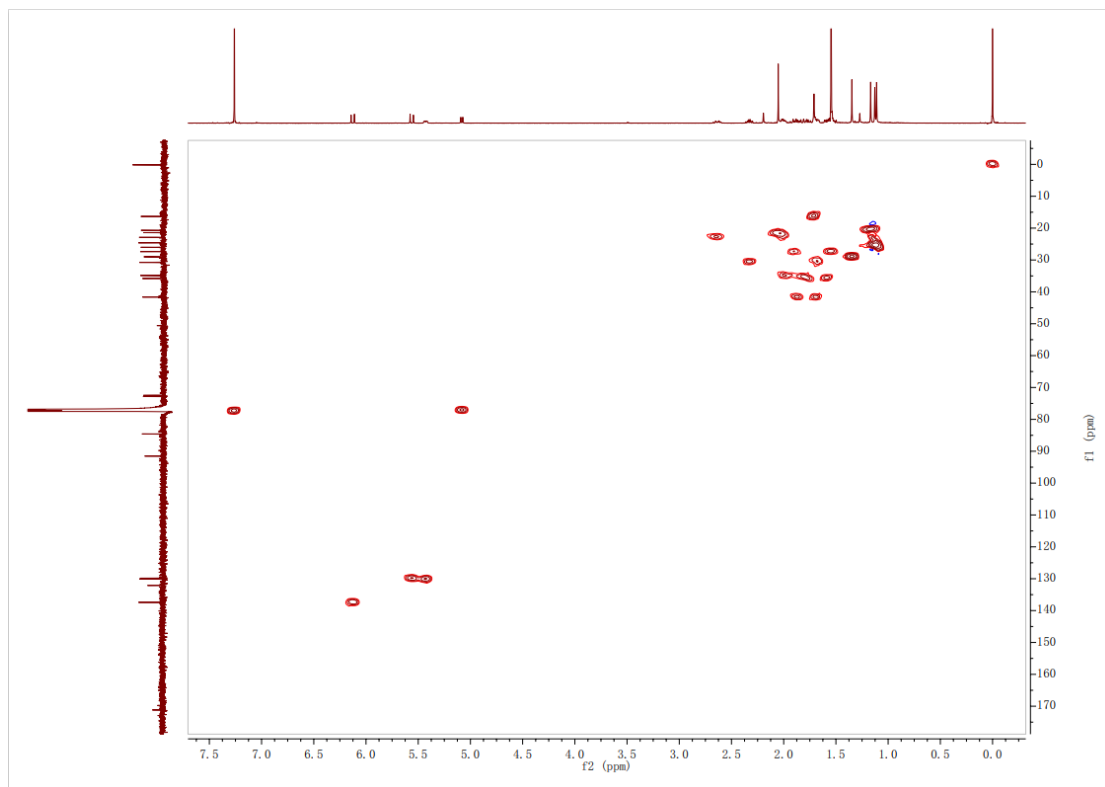

Figure S44. HMBC spectrum (500 MHz) of compound 8 in  $\text{CDCl}_3$



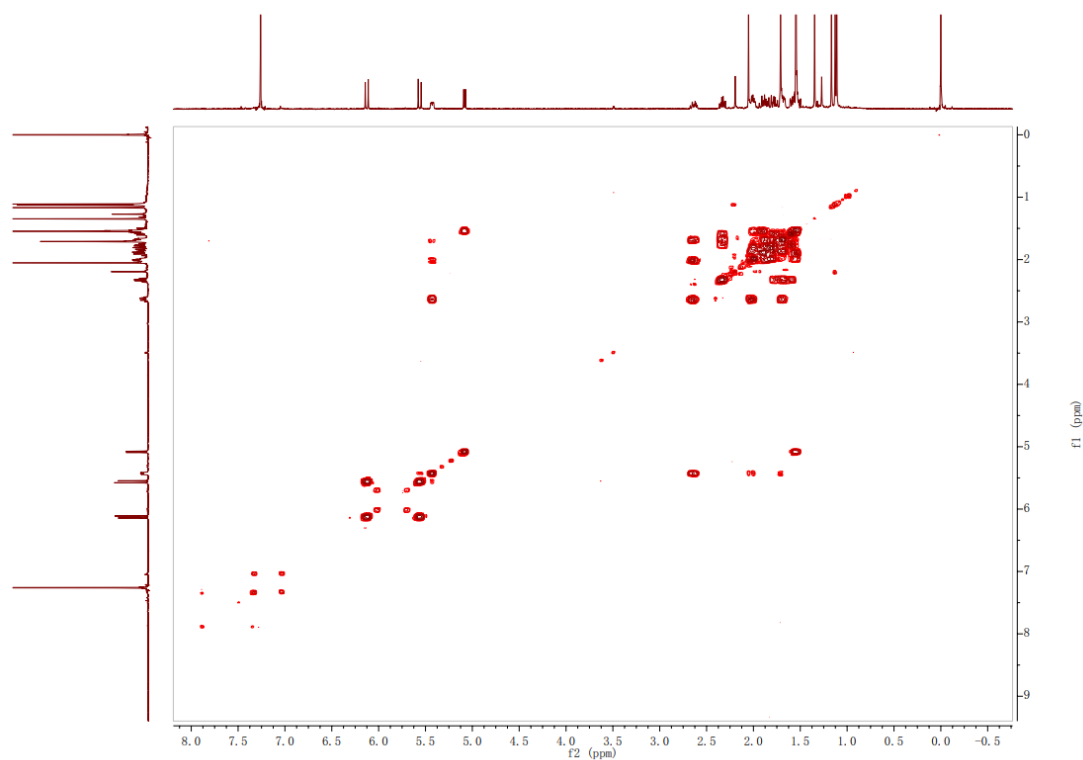

Figure S45.  $^1\text{H}$ - $^1\text{H}$  COSY spectrum (500 MHz) of compound 8 in  $\text{CDCl}_3$

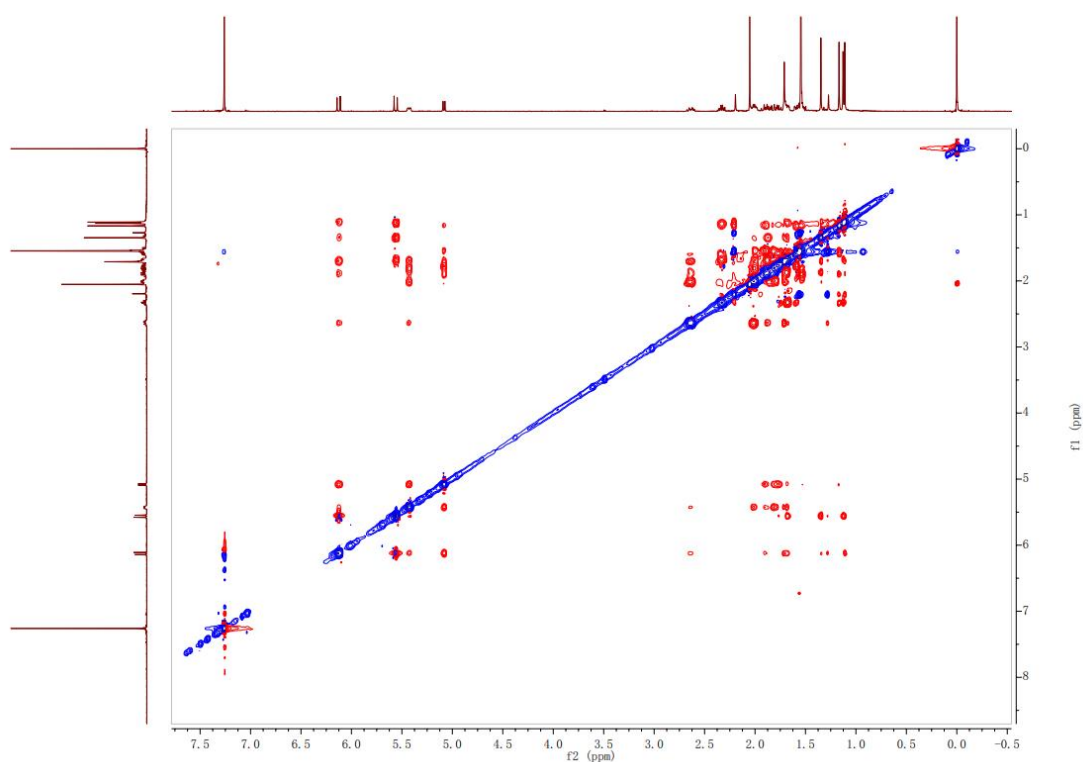

Figure S46. NOESY spectrum (500 MHz) of compound 8 in  $\text{CDCl}_3$

## Qualitative Analysis Report

|                        |                                        |                               |                             |
|------------------------|----------------------------------------|-------------------------------|-----------------------------|
| <b>Data Filename</b>   | ESI202202457.d                         | <b>Sample Name</b>            | A8-FCA-4-2                  |
| <b>Sample ID</b>       |                                        | <b>Position</b>               | P1-A8                       |
| <b>Instrument Name</b> | Agilent G6520 Q-TOF                    | <b>Acq Method</b>             | 20160322_MS_ESIH_POS_1min.m |
| <b>Acquired Time</b>   | 7/22/2022 14:23:25                     | <b>IRM Calibration Status</b> | Success                     |
| <b>DA Method</b>       | small molecular data analysis method.m | <b>Comment</b>                | ESI202202457.d              |

### User Spectra

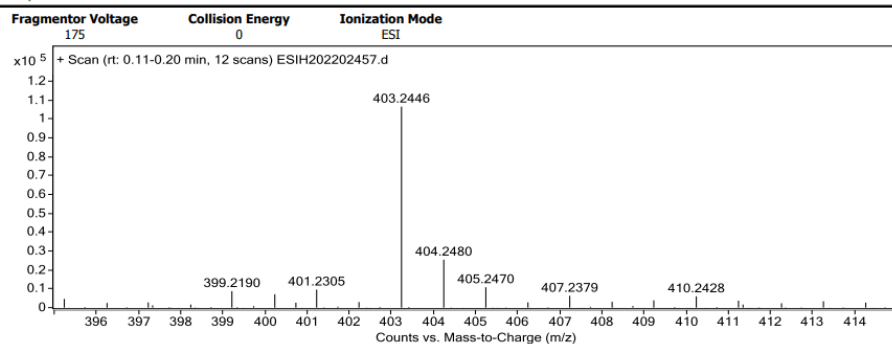

### Formula Calculator Results

| m/z      | Calc m/z | Diff (mDa) | Diff (ppm) | Ion Formula   | Ion     |
|----------|----------|------------|------------|---------------|---------|
| 403.2446 | 403.2455 | 0.92       | 2.27       | C22 H36 Na O5 | (M+Na)+ |

--- End Of Report ---

Figure S47. HR-ESIMS of compound 8

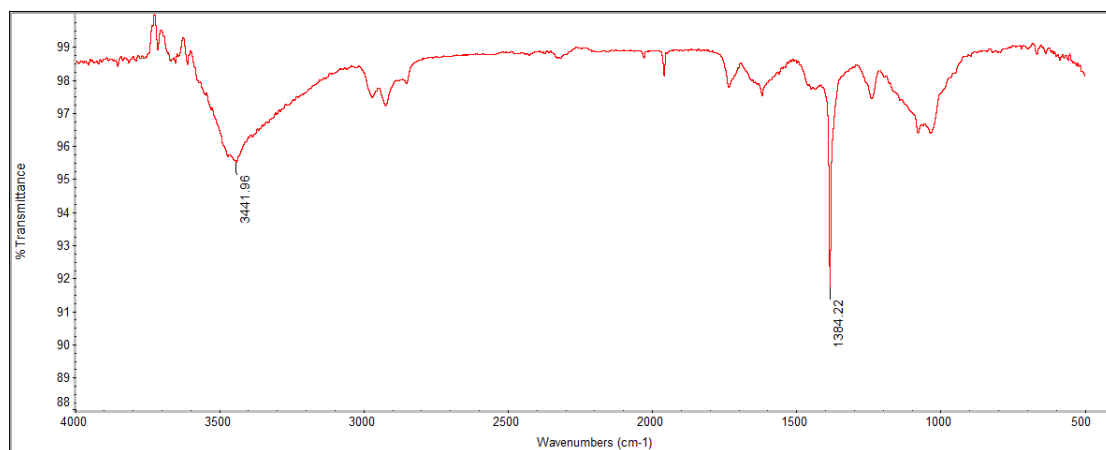

Figure S48. IR spectrum of compound 8

Table S1. X-ray crystallographic data for compound 1

|                                             |                                                               |
|---------------------------------------------|---------------------------------------------------------------|
| Empirical formula                           | C <sub>20</sub> H <sub>34</sub> O <sub>4</sub>                |
| Formula weight                              | 338.47                                                        |
| Temperature/K                               | 170.0                                                         |
| Crystal system                              | monoclinic                                                    |
| Space group                                 | P2 <sub>1</sub>                                               |
| a/Å                                         | 9.3012(3)                                                     |
| b/Å                                         | 24.6100(8)                                                    |
| c/Å                                         | 9.6893(3)                                                     |
| α/°                                         | 90                                                            |
| β/°                                         | 117.9940(10)                                                  |
| γ/°                                         | 90                                                            |
| Volume/Å <sup>3</sup>                       | 1958.40(11)                                                   |
| Z                                           | 4                                                             |
| ρ <sub>calc</sub> /g/cm <sup>3</sup>        | 1.148                                                         |
| μ/mm <sup>-1</sup>                          | 0.620                                                         |
| F (000)                                     | 744.0                                                         |
| Crystal size/mm <sup>3</sup>                | 0.19*0.08*0.07                                                |
| Radiation                                   | Cu Kα (λ = 1.54178)                                           |
| 2θ range for data collection/°              | 10.34 to 149.606                                              |
| Index ranges                                | -11 ≤ h ≤ 11, -30 ≤ k ≤ 30, -11 ≤ l ≤ 12                      |
| Reflections collected                       | 26834                                                         |
| Independent reflections                     | 7843 [R <sub>int</sub> = 0.0395, R <sub>sigma</sub> = 0.0351] |
| Data/restraints/parameters                  | 7843/1/470                                                    |
| Goodness-of-fit on F <sup>2</sup>           | 1.036                                                         |
| Final R indexes [I >= 2σ (I)]               | R <sub>1</sub> = 0.0336, wR <sub>2</sub> = 0.0772             |
| Final R indexes [all data]                  | R <sub>1</sub> = 0.0359, wR <sub>2</sub> = 0.0796             |
| Largest diff. peak/hole / e Å <sup>-3</sup> | 0.20/-0.15                                                    |
| Flack parameter                             | -0.05(6)                                                      |

**Table S2. X-ray crystallographic data for compound 4**

|                   |                                                |
|-------------------|------------------------------------------------|
| Empirical formula | C <sub>22</sub> H <sub>32</sub> O <sub>5</sub> |
| Formula weight    | 376.47                                         |
| Temperature/K     | 170.0                                          |
| Crystal system    | tetragonal                                     |
| Space group       | I4 <sub>1</sub>                                |
| a/Å               | 23.0912(7)                                     |
| b/Å               | 23.0912(7)                                     |
| c/Å               | 8.3133(4)                                      |
| α/°               | 90                                             |
| β/°               | 90                                             |

|                                                |                                                                    |
|------------------------------------------------|--------------------------------------------------------------------|
| $\gamma/^\circ$                                | 90                                                                 |
| Volume/ $\text{\AA}^3$                         | 4432.7(3)                                                          |
| Z                                              | 8                                                                  |
| $\rho_{\text{calc}}/\text{g/cm}^3$             | 1.128                                                              |
| $\mu/\text{mm}^{-1}$                           | 0.635                                                              |
| F (000)                                        | 1632.0                                                             |
| Crystal size/ $\text{mm}^3$                    | 0.12*0.08*0.05                                                     |
| Radiation                                      | Cu K $\alpha$ ( $\lambda$ = 1.54178)                               |
| 2 $\Theta$ range for data collection/ $^\circ$ | 5.412 to 149.152                                                   |
| Index ranges                                   | $-27 \leq h \leq 27$ , $-27 \leq k \leq 20$ , $-10 \leq l \leq 10$ |
| Reflections collected                          | 11788                                                              |
| Independent reflections                        | 4302 [ $R_{\text{int}} = 0.0409$ , $R_{\text{sigma}} = 0.0369$ ]   |
| Data/restraints/parameters                     | 4302/1/260                                                         |
| Goodness-of-fit on $F^2$                       | 1.050                                                              |
| Final R indexes [ $I > 2\sigma(I)$ ]           | $R_1 = 0.0378$ , $wR_2 = 0.0943$                                   |
| Final R indexes [all data]                     | $R_1 = 0.0418$ , $wR_2 = 0.0980$                                   |
| Largest diff. peak/hole / $e \text{\AA}^{-3}$  | 0.36/-0.24                                                         |
| Flack parameter                                | -0.03 (9)                                                          |

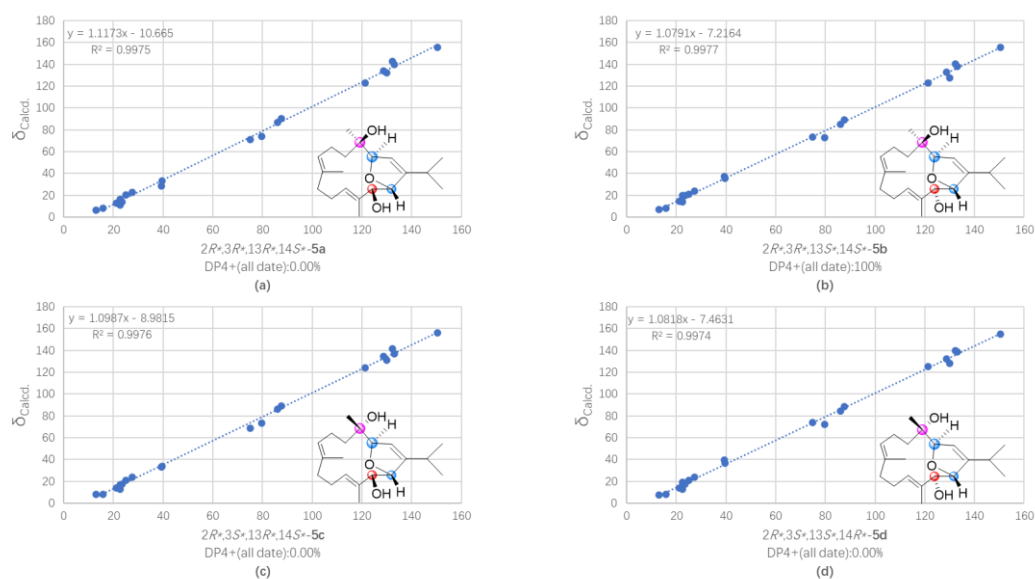

**Figure S49.** Regression analysis of experimental vs calculated  $^{13}\text{C}$  NMR chemical shifts of (2*R*\*, 3*R*\*, 13*R*\*, 14*S*\*)-5a, (2*R*\*, 3*R*\*, 13*S*\*, 14*S*\*)-5b, (2*R*\*, 3*S*\*, 13*R*\*, 14*S*\*)-5c, (2*R*\*, 3*S*\*, 13*S*\*, 14*R*\*)-5d at the PCM/mPW1PW91/6-31+G\*\* level using DP4+ method

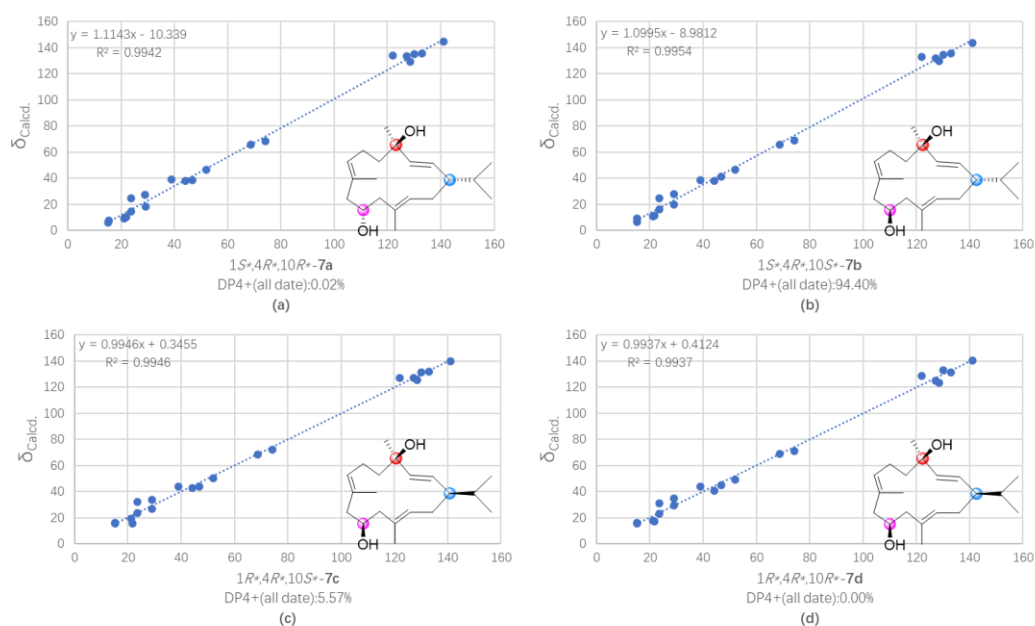

**Figure S50.** Regression analysis of experimental vs calculated  $^{13}\text{C}$  NMR chemical shifts of (1*S*\*, 4*R*\*, 10*R*\*)-**7a**, (1*S*\*, 4*R*\*, 10*S*\*)-**7b**, (1*R*\*, 4*R*\*, 10*S*\*)-**7c**, (1*R*\*, 4*R*\*, 10*R*\*)-**7d** at the PCM/mPW1PW91/6-31+G\*\* level using DP4+ method

**Table S3.** Cartesian coordinates of all conformers of isomers **5a-5b** used after optimization at the B3LYP/ 6-311G (d,p) level of theory as required for DP4+ analysis

|                 |         |         |        |   |         |         |         |
|-----------------|---------|---------|--------|---|---------|---------|---------|
| 05_3R4R13R14S_3 |         |         |        | O | -5.0307 | 12.9309 | 9.8948  |
| C               | -7.7717 | 8.9752  | 7.5353 | O | -5.6254 | 12.332  | 7.1392  |
| C               | -8.3176 | 10.1438 | 7.1497 | H | -8.6187 | 10.8524 | 7.9396  |
| C               | -7.6122 | 8.6512  | 9.0103 | H | -8.2967 | 9.2802  | 9.6269  |
| C               | -8.6187 | 10.6204 | 5.7494 | H | -7.9483 | 7.601   | 9.1788  |
| C               | -6.1715 | 8.8286  | 9.5186 | H | -9.7179 | 10.8143 | 5.7324  |
| C               | -7.8892 | 11.9175 | 5.3572 | H | -8.4619 | 9.8407  | 4.9747  |
| C               | -6.4067 | 11.7958 | 4.9374 | H | -5.4984 | 8.1389  | 8.9626  |
| C               | -5.4764 | 11.3959 | 6.0849 | H | -6.1306 | 8.5388  | 10.5952 |
| C               | -4.0141 | 11.3988 | 5.7525 | H | -8.4349 | 12.3574 | 4.488   |
| C               | -3.3507 | 12.1398 | 6.643  | H | -7.9956 | 12.6633 | 6.1798  |
| C               | -5.714  | 10.2628 | 9.4232 | H | -5.7401 | 10.3922 | 6.4852  |
| C               | -4.4624 | 10.7011 | 9.1953 | H | -3.5749 | 10.8415 | 4.911   |
| C               | -4.1763 | 12.1849 | 9.0597 | H | -6.5095 | 11.0137 | 9.5566  |
| C               | -4.3435 | 12.6917 | 7.6269 | H | -3.1523 | 12.4183 | 9.4339  |
| C               | -1.8696 | 12.4189 | 6.7004 | H | -4.3098 | 13.8056 | 7.5984  |
| C               | -1.0518 | 11.541  | 5.7389 | H | -1.526  | 12.18   | 7.7354  |
| C               | -1.5949 | 13.9051 | 6.4219 | H | 0.0403  | 11.7282 | 5.8581  |
| C               | -7.2767 | 7.9026  | 6.5935 | H | -1.2196 | 10.4567 | 5.9359  |
| C               | -6.2426 | 10.8625 | 3.7249 | H | -1.3071 | 11.7496 | 4.6747  |
| O               | -6.0052 | 13.0791 | 4.5028 | H | -0.5034 | 14.1268 | 6.4584  |
| C               | -3.2725 | 9.7883  | 9.0143 | H | -1.9694 | 14.1981 | 5.4142  |

|   |         |         |         |
|---|---------|---------|---------|
| H | -2.0844 | 14.5638 | 7.1752  |
| H | -7.3896 | 8.1456  | 5.5165  |
| H | -6.193  | 7.7123  | 6.7598  |
| H | -7.8296 | 6.9529  | 6.7719  |
| H | -5.2429 | 10.9754 | 3.248   |
| H | -6.3487 | 9.7928  | 4.0127  |
| H | -6.9975 | 11.0844 | 2.9365  |
| H | -5.9522 | 13.6377 | 5.2623  |
| H | -3.4621 | 8.7381  | 9.3239  |
| H | -2.9487 | 9.7737  | 7.9502  |
| H | -2.418  | 10.1392 | 9.6356  |
| H | -4.8702 | 12.6738 | 10.7879 |

05\_3R4R13R14S\_4

|   |         |         |         |
|---|---------|---------|---------|
| C | -7.7403 | 8.9618  | 7.5699  |
| C | -8.2869 | 10.1481 | 7.2431  |
| C | -7.5371 | 8.5829  | 9.0265  |
| C | -8.6241 | 10.6778 | 5.8702  |
| C | -6.082  | 8.7463  | 9.4983  |
| C | -7.8898 | 11.9788 | 5.4989  |
| C | -6.4199 | 11.8552 | 5.0373  |
| C | -5.4636 | 11.4328 | 6.1549  |
| C | -4.0107 | 11.4113 | 5.7841  |
| C | -3.3091 | 12.1181 | 6.6731  |
| C | -5.633  | 10.1853 | 9.441   |
| C | -4.3856 | 10.6361 | 9.2136  |
| C | -4.0976 | 12.1224 | 9.106   |
| C | -4.2651 | 12.6727 | 7.6898  |
| C | -1.8211 | 12.3621 | 6.7027  |
| C | -1.0438 | 11.4728 | 5.7184  |
| C | -1.5175 | 13.8437 | 6.4293  |
| C | -7.2822 | 7.9202  | 6.576   |
| C | -6.2935 | 10.9398 | 3.8069  |
| O | -6.0213 | 13.1417 | 4.61    |
| C | -3.1976 | 9.7269  | 9.0004  |
| O | -4.9168 | 12.8591 | 9.983   |
| O | -5.5669 | 12.3627 | 7.2213  |
| H | -8.5579 | 10.8302 | 8.0664  |
| H | -8.205  | 9.1865  | 9.6854  |
| H | -7.8659 | 7.5263  | 9.1663  |
| H | -9.7205 | 10.8857 | 5.8938  |
| H | -8.5021 | 9.9233  | 5.0648  |
| H | -5.424  | 8.0821  | 8.8948  |
| H | -6.0078 | 8.4165  | 10.5615 |
| H | -8.4528 | 12.4495 | 4.6574  |

|   |         |         |        |
|---|---------|---------|--------|
| H | -7.9668 | 12.7005 | 6.3459 |
| H | -5.7331 | 10.4301 | 6.5536 |
| H | -3.6044 | 10.8607 | 4.922  |
| H | -6.4347 | 10.9225 | 9.602  |
| H | -3.0698 | 12.3319 | 9.4812 |
| H | -4.2004 | 13.7857 | 7.6906 |
| H | -1.4636 | 12.1077 | 7.7293 |
| H | 0.0547  | 11.6319 | 5.8184 |
| H | -1.2351 | 10.3914 | 5.9092 |
| H | -1.3137 | 11.697  | 4.661  |
| H | -0.4207 | 14.04   | 6.4461 |
| H | -1.9044 | 14.1527 | 5.4311 |
| H | -1.9773 | 14.5079 | 7.1964 |

|   |         |         |        |
|---|---------|---------|--------|
| H | -7.4364 | 8.197   | 5.5125 |
| H | -6.1932 | 7.7251  | 6.6957 |
| H | -7.8289 | 6.9651  | 6.7441 |
| H | -5.3079 | 11.0579 | 3.3026 |
| H | -6.3934 | 9.8662  | 4.0817 |
| H | -7.0706 | 11.1752 | 3.0443 |
| H | -5.9374 | 13.6914 | 5.3727 |
| H | -3.3832 | 8.6718  | 9.2959 |
| H | -2.8901 | 9.7292  | 7.9314 |
| H | -2.3333 | 10.0658 | 9.6147 |
| H | -5.7742 | 12.9294 | 9.5966 |

05\_3R4R13R14S\_5

|   |         |         |        |
|---|---------|---------|--------|
| C | -7.7362 | 8.9494  | 7.5861 |
| C | -8.2989 | 10.1389 | 7.3009 |
| C | -7.5093 | 8.5311  | 9.0284 |
| C | -8.6629 | 10.703  | 5.9486 |
| C | -6.0495 | 8.6947  | 9.4853 |
| C | -7.951  | 12.0229 | 5.6006 |
| C | -6.4898 | 11.935  | 5.103  |
| C | -5.5171 | 11.4815 | 6.1953 |
| C | -4.0685 | 11.4752 | 5.8063 |
| C | -3.3586 | 12.1598 | 6.7058 |
| C | -5.614  | 10.1387 | 9.4603 |
| C | -4.3744 | 10.607  | 9.2262 |
| C | -4.1034 | 12.0986 | 9.1518 |
| C | -4.3034 | 12.6789 | 7.7518 |
| C | -1.8719 | 12.413  | 6.7215 |
| C | -1.1038 | 11.5608 | 5.698  |
| C | -1.5824 | 13.9046 | 6.4908 |
| C | -7.2829 | 7.9409  | 6.5566 |
| C | -6.3822 | 11.0623 | 3.8393 |

|                 |         |         |         |   |         |         |         |
|-----------------|---------|---------|---------|---|---------|---------|---------|
| O               | -6.1342 | 13.2498 | 4.7238  | C | -5.531  | 11.4481 | 6.1238  |
| C               | -3.1816 | 9.7152  | 8.9713  | C | -4.0724 | 11.4663 | 5.7749  |
| O               | -4.9177 | 12.8031 | 10.0591 | C | -3.4028 | 12.1886 | 6.6757  |
| O               | -5.6101 | 12.3594 | 7.3046  | C | -5.6977 | 10.2187 | 9.4442  |
| H               | -8.5644 | 10.7948 | 8.147   | C | -4.4539 | 10.6747 | 9.2082  |
| H               | -8.1735 | 9.1094  | 9.7133  | C | -4.1849 | 12.1644 | 9.1059  |
| H               | -7.8266 | 7.4678  | 9.1423  | C | -4.386  | 12.7043 | 7.6893  |
| H               | -9.7611 | 10.8968 | 5.996   | C | -1.9234 | 12.4796 | 6.719   |
| H               | -8.5465 | 9.9721  | 5.1211  | C | -1.1131 | 11.6398 | 5.7178  |
| H               | -5.3937 | 8.0529  | 8.8558  | C | -1.667  | 13.9763 | 6.4819  |
| H               | -5.9582 | 8.3374  | 10.5383 | C | -7.2845 | 7.9203  | 6.576   |
| H               | -8.539  | 12.5102 | 4.7859  | C | -6.3312 | 10.9659 | 3.7586  |
| H               | -8.0179 | 12.7194 | 6.4693  | O | -6.1223 | 13.1768 | 4.5902  |
| H               | -5.7745 | 10.4611 | 6.5549  | C | -3.2587 | 9.7785  | 8.9847  |
| H               | -3.6723 | 10.9538 | 4.9216  | O | -5.0288 | 12.8795 | 9.9776  |
| H               | -6.4197 | 10.8642 | 9.6526  | O | -5.6719 | 12.3373 | 7.2181  |
| H               | -3.072  | 12.3113 | 9.5151  | H | -8.6267 | 10.8232 | 8.0204  |
| H               | -4.2533 | 13.7923 | 7.7759  | H | -8.2684 | 9.208   | 9.66    |
| H               | -1.4971 | 12.1289 | 7.7339  | H | -7.9123 | 7.5446  | 9.1618  |
| H               | -0.0051 | 11.7247 | 5.7863  | H | -9.763  | 10.8315 | 5.8333  |
| H               | -1.2849 | 10.4726 | 5.8573  | H | -8.5136 | 9.8888  | 5.0287  |
| H               | -1.3916 | 11.8163 | 4.6524  | H | -5.4705 | 8.1097  | 8.9244  |
| H               | -0.4869 | 14.1081 | 6.4978  | H | -6.0818 | 8.4606  | 10.5762 |
| H               | -1.9862 | 14.2422 | 5.5086  | H | -8.5226 | 12.4157 | 4.6051  |
| H               | -2.0353 | 14.5409 | 7.2852  | H | -8.0486 | 12.6865 | 6.2933  |
| H               | -7.447  | 8.2502  | 5.5035  | H | -5.7805 | 10.428  | 6.4903  |
| H               | -6.1921 | 7.747   | 6.6605  | H | -3.6417 | 10.937  | 4.9112  |
| H               | -7.8241 | 6.9787  | 6.7002  | H | -6.4976 | 10.9583 | 9.6097  |
| H               | -5.4036 | 11.1933 | 3.3248  | H | -3.156  | 12.3987 | 9.4657  |
| H               | -6.4799 | 9.9801  | 4.0786  | H | -4.3673 | 13.8189 | 7.6868  |
| H               | -7.1698 | 11.3251 | 3.0969  | H | -1.5607 | 12.2124 | 7.7404  |
| H               | -5.2374 | 13.2652 | 4.4329  | H | -0.0211 | 11.8344 | 5.8249  |
| H               | -3.352  | 8.6519  | 9.2457  | H | -1.2671 | 10.5484 | 5.8843  |
| H               | -2.8931 | 9.7451  | 7.8975  | H | -1.3881 | 11.878  | 4.6648  |
| H               | -2.3101 | 10.0488 | 9.5783  | H | -0.5772 | 14.2075 | 6.5076  |
| H               | -5.7755 | 12.8901 | 9.6757  | H | -2.0608 | 14.2964 | 5.4899  |
| 05_3R4R13R14S_6 |         |         |         | H | -2.1501 | 14.6067 | 7.2631  |
| C               | -7.7723 | 8.9638  | 7.5535  | H | -7.4136 | 8.192   | 5.5077  |
| C               | -8.333  | 10.1379 | 7.2076  | H | -6.1974 | 7.7324  | 6.722   |
| C               | -7.5877 | 8.6019  | 9.0167  | H | -7.8292 | 6.9627  | 6.7362  |
| C               | -8.662  | 10.6478 | 5.8253  | H | -5.3389 | 11.0891 | 3.2691  |
| C               | -6.1411 | 8.7784  | 9.5084  | H | -6.4313 | 9.8895  | 4.0224  |
| C               | -7.9526 | 11.9614 | 5.451   | H | -7.0986 | 11.2056 | 2.9877  |
| C               | -6.478  | 11.87   | 4.9962  | H | -5.2086 | 13.2014 | 4.3596  |

|                 |         |         |         |
|-----------------|---------|---------|---------|
| H               | -3.4336 | 8.719   | 9.2701  |
| H               | -2.952  | 9.7944  | 7.9156  |
| H               | -2.3976 | 10.1216 | 9.6013  |
| H               | -4.8519 | 12.5979 | 10.8598 |
| 05_3R4R13R14S_7 |         |         |         |
| C               | -7.7337 | 8.9863  | 7.5834  |
| C               | -8.263  | 10.1903 | 7.2946  |
| C               | -7.5271 | 8.5617  | 9.027   |
| C               | -8.6064 | 10.7617 | 5.9402  |
| C               | -6.0678 | 8.693   | 9.4957  |
| C               | -7.8625 | 12.064  | 5.5924  |
| C               | -6.4011 | 11.9351 | 5.1048  |
| C               | -5.4457 | 11.4661 | 6.2054  |
| C               | -3.9936 | 11.4509 | 5.8304  |
| C               | -3.2862 | 12.1208 | 6.7429  |
| C               | -5.6037 | 10.1281 | 9.4792  |
| C               | -4.3548 | 10.5738 | 9.2502  |
| C               | -4.0568 | 12.0605 | 9.1811  |
| C               | -4.2375 | 12.645  | 7.7803  |
| C               | -1.7971 | 12.3574 | 6.7767  |
| C               | -1.0273 | 11.5061 | 5.7537  |
| C               | -1.488  | 13.8477 | 6.5636  |
| C               | -7.3011 | 7.9656  | 6.557   |
| C               | -6.2927 | 11.0465 | 3.8522  |
| O               | -5.9751 | 13.2292 | 4.7287  |
| C               | -3.1782 | 9.6613  | 8.9939  |
| O               | -4.8666 | 12.7771 | 10.0833 |
| O               | -5.5429 | 12.3374 | 7.3202  |
| H               | -8.5161 | 10.8534 | 8.1389  |
| H               | -8.1843 | 9.1535  | 9.707   |
| H               | -7.8683 | 7.5055  | 9.1372  |
| H               | -9.7001 | 10.9809 | 5.9816  |
| H               | -8.5021 | 10.0275 | 5.1138  |
| H               | -5.4204 | 8.0401  | 8.869   |
| H               | -5.9921 | 8.3305  | 10.5481 |
| H               | -8.4356 | 12.5588 | 4.7718  |
| H               | -7.9181 | 12.7669 | 6.4565  |
| H               | -5.7169 | 10.4462 | 6.557   |
| H               | -3.5923 | 10.9307 | 4.9472  |
| H               | -6.3959 | 10.868  | 9.6726  |
| H               | -3.0249 | 12.255  | 9.5531  |
| H               | -4.1779 | 13.758  | 7.8072  |
| H               | -1.4365 | 12.0594 | 7.7903  |
| H               | 0.0722  | 11.6571 | 5.8551  |

|                 |         |         |         |
|-----------------|---------|---------|---------|
| H               | -1.2218 | 10.4184 | 5.9014  |
| H               | -1.3011 | 11.7739 | 4.7075  |
| H               | -0.3903 | 14.0383 | 6.584   |
| H               | -1.8775 | 14.1995 | 5.5807  |
| H               | -1.9417 | 14.4814 | 7.3596  |
| H               | -7.449  | 8.2792  | 5.5029  |
| H               | -6.2169 | 7.7415  | 6.669   |
| H               | -7.8699 | 7.0188  | 6.6964  |
| H               | -5.31   | 11.1674 | 3.3431  |
| H               | -6.4017 | 9.9678  | 4.1024  |
| H               | -7.0745 | 11.3058 | 3.1023  |
| H               | -6.4912 | 13.5291 | 3.9989  |
| H               | -2.3016 | 9.9771  | 9.6031  |
| H               | -3.3685 | 8.6004  | 9.2647  |
| H               | -2.8876 | 9.6895  | 7.9206  |
| H               | -5.7165 | 12.8847 | 9.6881  |
| 05_3R4R13R14S_8 |         |         |         |
| C               | -7.771  | 9.005   | 7.5524  |
| C               | -8.2958 | 10.1954 | 7.2054  |
| C               | -7.6041 | 8.6351  | 9.0158  |
| C               | -8.6067 | 10.7143 | 5.8224  |
| C               | -6.1572 | 8.7773  | 9.5178  |
| C               | -7.8613 | 12.0076 | 5.4468  |
| C               | -6.388  | 11.8696 | 4.9997  |
| C               | -5.4578 | 11.4304 | 6.134   |
| C               | -3.9962 | 11.4434 | 5.7985  |
| C               | -3.3298 | 12.151  | 6.7133  |
| C               | -5.6846 | 10.2085 | 9.4638  |
| C               | -4.4318 | 10.6414 | 9.2329  |
| C               | -4.1356 | 12.1263 | 9.1357  |
| C               | -4.3201 | 12.6697 | 7.7183  |
| C               | -1.848  | 12.426  | 6.7762  |
| C               | -1.0359 | 11.5951 | 5.7692  |
| C               | -1.5725 | 13.9237 | 6.569   |
| C               | -7.3092 | 7.9486  | 6.5761  |
| C               | -6.2473 | 10.9487 | 3.7738  |
| O               | -5.9545 | 13.1538 | 4.5982  |
| C               | -3.2535 | 9.7239  | 9.0066  |
| O               | -4.9725 | 12.8543 | 10.0039 |
| O               | -5.604  | 12.3105 | 7.2355  |
| H               | -8.573  | 10.8882 | 8.0177  |
| H               | -8.2755 | 9.2548  | 9.656   |
| H               | -7.9537 | 7.5852  | 9.1562  |
| H               | -9.7024 | 10.9277 | 5.8274  |



|                 |         |         |         |                  |         |         |         |
|-----------------|---------|---------|---------|------------------|---------|---------|---------|
| H               | -8.4768 | 9.951   | 5.0267  | C                | -1.1813 | 10.8373 | 5.7727  |
| H               | -5.497  | 8.098   | 8.9341  | C                | -1.2194 | 13.3325 | 6.1218  |
| H               | -6.1114 | 8.4529  | 10.5842 | C                | -8.8967 | 9.5026  | 7.8065  |
| H               | -8.417  | 12.4702 | 4.596   | C                | -5.923  | 13.117  | 4.1587  |
| H               | -7.9414 | 12.7403 | 6.284   | O                | -7.6786 | 12.5057 | 5.6378  |
| H               | -5.7198 | 10.4094 | 6.4901  | C                | -3.4777 | 9.8153  | 9.2519  |
| H               | -3.5602 | 10.9165 | 4.936   | O                | -4.854  | 13.1723 | 9.8168  |
| H               | -6.4704 | 10.9628 | 9.6311  | O                | -5.4069 | 12.8011 | 7.0645  |
| H               | -3.105  | 12.3424 | 9.5022  | H                | -6.149  | 8.5914  | 5.8233  |
| H               | -4.2947 | 13.7842 | 7.718   | H                | -7.1737 | 7.3903  | 8.7153  |
| H               | -1.4987 | 12.1369 | 7.7963  | H                | -5.6932 | 8.077   | 7.9968  |
| H               | 0.0569  | 11.777  | 5.8902  | H                | -8.0584 | 8.9396  | 4.1587  |
| H               | -1.202  | 10.5026 | 5.9158  | H                | -8.7438 | 10.2289 | 5.1799  |
| H               | -1.2981 | 11.8537 | 4.7177  | H                | -5.8444 | 8.6729  | 10.3921 |
| H               | -0.4805 | 14.142  | 6.6097  | H                | -7.449  | 9.368   | 10.1979 |
| H               | -1.9525 | 14.2662 | 5.5791  | H                | -5.9503 | 10.2705 | 3.8454  |
| H               | -2.0563 | 14.5453 | 7.3568  | H                | -7.4133 | 11.1293 | 3.3088  |
| H               | -7.4243 | 8.2252  | 5.5075  | H                | -5.9092 | 10.8695 | 6.8319  |
| H               | -6.2292 | 7.7281  | 6.7281  | H                | -3.841  | 10.6676 | 4.9914  |
| H               | -7.8832 | 7.0075  | 6.7319  | H                | -6.5917 | 11.411  | 9.3313  |
| H               | -5.2502 | 11.0536 | 3.2899  | H                | -3.0514 | 12.3872 | 9.4419  |
| H               | -6.367  | 9.8769  | 4.0482  | H                | -3.7701 | 13.8763 | 7.56    |
| H               | -7.0069 | 11.1906 | 2.9957  | H                | -1.4289 | 11.826  | 7.6699  |
| H               | -6.4783 | 13.4481 | 3.8721  | H                | -0.0701 | 10.8081 | 5.8529  |
| H               | -2.3865 | 10.0488 | 9.6247  | H                | -1.5603 | 9.8464  | 6.1144  |
| H               | -3.4487 | 8.6669  | 9.2884  | H                | -1.43   | 10.9539 | 4.693   |
| H               | -2.946  | 9.7377  | 7.9377  | H                | -0.1051 | 13.337  | 6.1102  |
| H               | -4.8007 | 12.5716 | 10.8866 | H                | -1.5725 | 13.5504 | 5.0876  |
| 05_3R4R13R14S_9 |         |         |         | H                | -1.5409 | 14.1736 | 6.7775  |
| C               | -7.5628 | 8.9731  | 7.3369  | H                | -9.631  | 9.6667  | 6.9894  |
| C               | -7.1292 | 9.0372  | 6.0631  | H                | -9.3743 | 8.7737  | 8.4995  |
| C               | -6.6913 | 8.3492  | 8.4117  | H                | -8.7645 | 10.4682 | 8.344   |
| C               | -7.7906 | 9.7312  | 4.8983  | H                | -5.641  | 14.0194 | 4.7479  |
| C               | -6.4822 | 9.2226  | 9.6614  | H                | -5.0157 | 12.7714 | 3.613   |
| C               | -6.8746 | 10.77   | 4.218   | H                | -6.669  | 13.4421 | 3.3978  |
| C               | -6.4906 | 12.0069 | 5.0625  | H                | -7.4328 | 13.1077 | 6.3237  |
| C               | -5.5176 | 11.6866 | 6.1986  | H                | -3.8496 | 8.779   | 9.3999  |
| C               | -4.1096 | 11.3547 | 5.8086  | H                | -2.9234 | 9.8169  | 8.288   |
| C               | -3.271  | 12.0003 | 6.6237  | H                | -2.7562 | 10.0245 | 10.0735 |
| C               | -5.871  | 10.5785 | 9.3935  | H                | -4.7512 | 12.9297 | 10.7224 |
| C               | -4.5652 | 10.8637 | 9.2318  | 05_3R4R13R14S_10 |         |         |         |
| C               | -4.0843 | 12.2918 | 9.0316  | C                | -7.8161 | 9.0186  | 7.6096  |
| C               | -4.0913 | 12.8092 | 7.5909  | C                | -8.3368 | 10.1942 | 7.2118  |
| C               | -1.7638 | 11.9831 | 6.6164  | C                | -7.642  | 8.7207  | 9.0879  |

|   |         |         |         |                  |         |         |         |
|---|---------|---------|---------|------------------|---------|---------|---------|
| C | -8.6679 | 10.6438 | 5.8102  | H                | -5.3985 | 10.8955 | 3.161   |
| C | -6.1847 | 8.8439  | 9.5607  | H                | -6.4988 | 9.7485  | 3.9836  |
| C | -7.9277 | 11.919  | 5.3729  | H                | -7.1615 | 11.0464 | 2.924   |
| C | -6.4681 | 11.7605 | 4.8915  | H                | -5.9769 | 13.6017 | 5.1726  |
| C | -5.485  | 11.3511 | 5.9933  | H                | -3.5211 | 8.6096  | 9.0693  |
| C | -4.0435 | 11.4304 | 5.5833  | H                | -3.1023 | 9.6394  | 7.6635  |
| C | -3.3703 | 12.2081 | 6.4342  | H                | -2.3817 | 9.9436  | 9.2971  |
| C | -5.6647 | 10.2527 | 9.4127  | H                | -4.591  | 12.5923 | 10.7002 |
| C | -4.4214 | 10.6287 | 9.0604  | 05_3R4R13R14S_11 |         |         |         |
| C | -4.0676 | 12.0982 | 8.9132  | C                | -7.5136 | 8.9393  | 7.3648  |
| C | -4.321  | 12.6514 | 7.5105  | C                | -7.1073 | 9.0784  | 6.088   |
| C | -1.9217 | 12.6082 | 6.2975  | C                | -6.6086 | 8.2822  | 8.3911  |
| C | -1.6842 | 14.0635 | 6.7283  | C                | -7.8082 | 9.819   | 4.9759  |
| C | -0.9685 | 11.6533 | 7.0292  | C                | -6.3802 | 9.1105  | 9.668   |
| C | -7.3753 | 7.9122  | 6.6803  | C                | -6.9142 | 10.8784 | 4.2979  |
| C | -6.379  | 10.8129 | 3.6816  | C                | -6.4987 | 12.0892 | 5.1658  |
| O | -6.0664 | 13.0327 | 4.4244  | C                | -5.517  | 11.7258 | 6.2814  |
| C | -3.3098 | 9.6539  | 8.7558  | C                | -4.1287 | 11.3567 | 5.8544  |
| O | -4.8142 | 12.8688 | 9.8266  | C                | -3.2516 | 11.9647 | 6.6576  |
| O | -5.6128 | 12.2587 | 7.0755  | C                | -5.7873 | 10.4801 | 9.4287  |
| H | -8.5995 | 10.9275 | 7.9927  | C                | -4.4856 | 10.7849 | 9.2671  |
| H | -8.2835 | 9.3938  | 9.7042  | C                | -4.0121 | 12.2188 | 9.0866  |
| H | -8.0217 | 7.6908  | 9.2867  | C                | -4.0245 | 12.7748 | 7.6604  |
| H | -8.5476 | 9.8449  | 5.0487  | C                | -1.7461 | 11.9118 | 6.6079  |
| H | -9.7635 | 10.8571 | 5.8202  | C                | -1.2151 | 10.7594 | 5.7397  |
| H | -5.5631 | 8.1001  | 9.0161  | C                | -1.1853 | 13.252  | 6.1061  |
| H | -6.1332 | 8.5844  | 10.6446 | C                | -8.8493 | 9.415   | 7.8844  |
| H | -8.5001 | 12.3596 | 4.5214  | C                | -5.9237 | 13.2091 | 4.2787  |
| H | -7.9849 | 12.6781 | 6.1881  | O                | -7.6721 | 12.592  | 5.7666  |
| H | -5.7039 | 10.3301 | 6.3789  | C                | -3.3893 | 9.7446  | 9.2647  |
| H | -3.6191 | 10.9442 | 4.6907  | O                | -4.7466 | 13.0862 | 9.9173  |
| H | -6.4046 | 11.0408 | 9.6271  | O                | -5.3523 | 12.82   | 7.1659  |
| H | -3.0095 | 12.277  | 9.2117  | H                | -6.1243 | 8.6649  | 5.8056  |
| H | -4.3423 | 13.7659 | 7.529   | H                | -7.0714 | 7.3057  | 8.6678  |
| H | -1.6713 | 12.5399 | 5.2103  | H                | -5.6173 | 8.0406  | 7.9422  |
| H | -0.6305 | 14.3718 | 6.5371  | H                | -8.1087 | 9.0563  | 4.2188  |
| H | -2.3429 | 14.7644 | 6.165   | H                | -8.7456 | 10.3117 | 5.314   |
| H | -1.8772 | 14.2033 | 7.8164  | H                | -5.7238 | 8.5405  | 10.3657 |
| H | 0.0948  | 11.9229 | 6.8327  | H                | -7.3364 | 9.2293  | 10.2297 |
| H | -1.1136 | 11.6883 | 8.1311  | H                | -6.0052 | 10.3891 | 3.8772  |
| H | -1.1082 | 10.6018 | 6.6887  | H                | -7.4826 | 11.2674 | 3.4194  |
| H | -7.4916 | 8.1424  | 5.6008  | H                | -5.9259 | 10.9125 | 6.9085  |
| H | -6.2975 | 7.6834  | 6.8353  | H                | -3.8989 | 10.6793 | 5.0177  |
| H | -7.9614 | 6.9875  | 6.8825  | H                | -6.5235 | 11.2992 | 9.3843  |

|   |         |         |         |
|---|---------|---------|---------|
| H | -2.9766 | 12.2959 | 9.4916  |
| H | -3.6725 | 13.8326 | 7.6509  |
| H | -1.3851 | 11.7408 | 7.6505  |
| H | -0.1033 | 10.7021 | 5.7897  |
| H | -1.6096 | 9.7752  | 6.0831  |
| H | -1.4896 | 10.8913 | 4.6681  |
| H | -0.072  | 13.2318 | 6.064   |
| H | -1.5617 | 13.4844 | 5.0833  |
| H | -1.4702 | 14.096  | 6.7751  |
| H | -9.6048 | 9.592   | 7.0894  |
| H | -9.2937 | 8.6466  | 8.5564  |
| H | -8.7292 | 10.361  | 8.4584  |
| H | -5.6199 | 14.0942 | 4.8829  |
| H | -5.0283 | 12.8609 | 3.7151  |
| H | -6.673  | 13.5619 | 3.5336  |
| H | -7.4161 | 13.2482 | 6.3949  |
| H | -3.7519 | 8.7007  | 9.3781  |
| H | -2.829  | 9.7771  | 8.305   |
| H | -2.6745 | 9.9353  | 10.0967 |
| H | -5.5832 | 13.2382 | 9.5103  |

05\_3R4R13R14S\_12

|   |         |         |        |
|---|---------|---------|--------|
| C | -7.8743 | 9.019   | 7.5698 |
| C | -8.3602 | 10.2237 | 7.217  |
| C | -7.6674 | 8.6755  | 9.0339 |
| C | -8.6883 | 10.7324 | 5.8351 |
| C | -6.198  | 8.7847  | 9.4735 |
| C | -7.8908 | 11.9825 | 5.4244 |
| C | -6.4332 | 11.7724 | 4.9553 |
| C | -5.473  | 11.3612 | 6.0764 |
| C | -4.0289 | 11.3285 | 5.6742 |
| C | -3.3047 | 12.0707 | 6.5158 |
| C | -5.6831 | 10.1988 | 9.3667 |
| C | -4.4245 | 10.5865 | 9.0906 |
| C | -4.0727 | 12.0587 | 8.9793 |
| C | -4.2291 | 12.6225 | 7.5648 |
| C | -1.8571 | 12.4388 | 6.3032 |
| C | -1.7827 | 13.8    | 5.5912 |
| C | -1.0082 | 12.4525 | 7.5803 |
| C | -7.4885 | 7.926   | 6.6011 |
| C | -6.3647 | 10.8002 | 3.7642 |
| O | -5.9888 | 13.0222 | 4.467  |
| C | -3.2816 | 9.6273  | 8.855  |
| O | -4.8798 | 12.8239 | 9.8443 |
| O | -5.5411 | 12.3367 | 7.1043 |

|   |         |         |         |
|---|---------|---------|---------|
| H | -8.5805 | 10.9427 | 8.024   |
| H | -8.2938 | 9.3308  | 9.6841  |
| H | -8.0435 | 7.6406  | 9.2123  |
| H | -9.772  | 10.9981 | 5.8657  |
| H | -8.6154 | 9.9521  | 5.0487  |
| H | -5.5862 | 8.0698  | 8.8801  |
| H | -6.1185 | 8.4833  | 10.5447 |
| H | -8.4368 | 12.4568 | 4.5737  |
| H | -7.925  | 12.7315 | 6.2502  |
| H | -5.7531 | 10.376  | 6.5109  |
| H | -3.642  | 10.8234 | 4.7753  |
| H | -6.438  | 10.9813 | 9.5452  |
| H | -3.041  | 12.224  | 9.3613  |
| H | -4.1438 | 13.7341 | 7.5734  |
| H | -1.4144 | 11.6763 | 5.6165  |
| H | -0.7291 | 14.0724 | 5.3507  |
| H | -2.3512 | 13.7866 | 4.6323  |
| H | -2.2045 | 14.6133 | 6.225   |
| H | 0.0624  | 12.6515 | 7.3436  |
| H | -1.338  | 13.2527 | 8.2806  |
| H | -1.0483 | 11.472  | 8.1065  |
| H | -7.6579 | 8.1741  | 5.5328  |
| H | -6.4067 | 7.6854  | 6.7019  |
| H | -8.0734 | 7.0028  | 6.8138  |
| H | -5.3862 | 10.8566 | 3.2365  |
| H | -6.5001 | 9.7445  | 4.0886  |
| H | -7.1467 | 11.032  | 3.0055  |
| H | -5.8738 | 13.5968 | 5.2076  |
| H | -2.4247 | 9.8843  | 9.5173  |
| H | -3.5263 | 8.5662  | 9.0742  |
| H | -2.9386 | 9.6789  | 7.7981  |
| H | -4.722  | 12.5379 | 10.7291 |

05\_3R4R13R14S\_13

|   |         |         |        |
|---|---------|---------|--------|
| C | -7.0818 | 8.7012  | 7.1522 |
| C | -6.851  | 9.0609  | 5.8755 |
| C | -6.0274 | 7.9706  | 7.9635 |
| C | -7.7568 | 9.8835  | 4.9882 |
| C | -5.6093 | 8.6862  | 9.262  |
| C | -7.0278 | 11.0268 | 4.2534 |
| C | -6.5887 | 12.2325 | 5.1168 |
| C | -5.6881 | 11.8405 | 6.2877 |
| C | -4.3695 | 11.2362 | 5.9099 |
| C | -3.4133 | 11.7591 | 6.6799 |
| C | -4.7918 | 9.937   | 9.0326 |

|   |         |         |         |                 |          |                   |
|---|---------|---------|---------|-----------------|----------|-------------------|
| C | -5.0975 | 11.2088 | 9.3557  | 05_3R4R13S14S_3 |          |                   |
| C | -4.1147 | 12.3324 | 9.064   | C               | 2.924407 | 2.042198 -0.34286 |
| C | -4.0541 | 12.7652 | 7.5956  | C               | 3.141767 | 0.556377 -0.48185 |
| C | -1.9371 | 11.4564 | 6.6597  | C               | 1.644037 | 2.571412 -1.03986 |
| C | -1.6089 | 10.1344 | 5.9466  | C               | -0.11528 | 1.103115 0.116976 |
| C | -1.1672 | 12.6175 | 6.0116  | C               | -1.41048 | 0.950097 0.869441 |
| C | -8.3818 | 8.9876  | 7.865   | C               | 3.366214 | -0.37054 0.464176 |
| C | -5.9175 | 13.297  | 4.2295  | C               | 1.14762  | -2.3754 -0.42237  |
| O | -7.7603 | 12.8104 | 5.651   | C               | 3.574036 | -1.82187 0.069908 |
| C | -6.3976 | 11.6365 | 9.997   | C               | -1.21385 | -1.92468 -1.02245 |
| O | -4.4187 | 13.4705 | 9.8365  | C               | -1.54103 | -0.40624 -1.00369 |
| O | -5.3581 | 12.9723 | 7.075   | C               | 2.371813 | -2.75469 0.369096 |
| H | -5.8934 | 8.7654  | 5.4172  | C               | -0.13618 | -2.35659 -0.03165 |
| H | -6.4513 | 6.9703  | 8.2171  | C               | 0.308263 | 2.546973 -0.25144 |
| H | -5.1151 | 7.7716  | 7.3536  | C               | -2.23186 | 0.096519 0.251956 |
| H | -8.1817 | 9.1807  | 4.233   | C               | -3.6279  | -0.32918 0.645821 |
| H | -8.6157 | 10.319  | 5.5451  | C               | 3.436536 | -0.08892 1.946495 |
| H | -4.9617 | 7.9969  | 9.8545  | C               | -0.6341  | -2.75973 1.335547 |
| H | -6.4993 | 8.8592  | 9.9044  | O               | -0.35541 | 0.391878 -1.11802 |
| H | -6.1512 | 10.6122 | 3.7034  | C               | -4.03439 | 0.178121 2.036007 |
| H | -7.7177 | 11.4148 | 3.466   | C               | -4.66136 | 0.108895 -0.41524 |
| H | -6.2428 | 11.1641 | 6.9712  | C               | 0.376232 | 3.435423 0.992619 |
| H | -4.2329 | 10.4716 | 5.1308  | O               | -0.70395 | 3.113386 -1.09487 |
| H | -3.8153 | 9.7558  | 8.5537  | O               | -0.8719  | -2.20556 -2.38176 |
| H | -3.0946 | 12.0237 | 9.3935  | H               | 0.712837 | 0.623497 0.655735 |
| H | -3.5271 | 13.7422 | 7.4938  | H               | -2.14333 | -0.23168 -1.90615 |
| H | -1.6031 | 11.3495 | 7.7194  | H               | 2.949843 | 2.359724 0.704628 |
| H | -0.5229 | 9.8972  | 6.0265  | H               | 3.776671 | 2.546803 -0.82292 |
| H | -2.1663 | 9.2813  | 6.3988  | H               | 3.123677 | 0.210618 -1.51733 |
| H | -1.8553 | 10.1781 | 4.861   | H               | 1.800208 | 3.620112 -1.32026 |
| H | -0.0719 | 12.4131 | 5.9928  | H               | 1.494076 | 2.019457 -1.97624 |
| H | -1.5021 | 12.7816 | 4.9615  | H               | -1.60662 | 1.457338 1.806361 |
| H | -1.3123 | 13.5708 | 6.5694  | H               | 1.3472   | -2.07212 -1.44924 |
| H | -9.2504 | 9.0558  | 7.1744  | H               | 3.794175 | -1.88001 -1.00348 |
| H | -8.6304 | 8.1682  | 8.5764  | H               | 4.453815 | -2.22334 0.593477 |
| H | -8.3132 | 9.9418  | 8.4314  | H               | -2.15001 | -2.45226 -0.76887 |
| H | -5.6367 | 14.2023 | 4.8146  | H               | 2.679414 | -3.77848 0.103893 |
| H | -4.9903 | 12.9027 | 3.7547  | H               | 2.168184 | -2.77176 1.445218 |
| H | -6.5983 | 13.6311 | 3.4135  | H               | -3.64702 | -1.42966 0.67575  |
| H | -7.4986 | 13.4655 | 6.2792  | H               | 4.427739 | -0.3511 2.342521  |
| H | -7.1262 | 10.8167 | 10.1602 | H               | 3.245781 | 0.958013 2.194552 |
| H | -6.2085 | 12.0827 | 10.999  | H               | 2.711259 | -0.69899 2.501614 |
| H | -6.9066 | 12.3945 | 9.3595  | H               | -1.31416 | -3.62019 1.262996 |
| H | -4.1993 | 13.2904 | 10.736  | H               | 0.178249 | -3.03757 2.011184 |

|                 |          |          |          |                 |          |          |          |
|-----------------|----------|----------|----------|-----------------|----------|----------|----------|
| H               | -1.20155 | -1.94925 | 1.808479 | H               | 1.405171 | -2.17022 | -1.48188 |
| H               | -5.03085 | -0.19303 | 2.29926  | H               | 3.784891 | -1.98554 | -0.88241 |
| H               | -3.3328  | -0.15611 | 2.808356 | H               | 4.346974 | -2.32182 | 0.752284 |
| H               | -4.06904 | 1.273897 | 2.061042 | H               | -2.08854 | -2.45523 | -1.18784 |
| H               | -5.66306 | -0.23588 | -0.13464 | H               | 2.572395 | -3.84897 | 0.190194 |
| H               | -4.68787 | 1.201654 | -0.49956 | H               | 1.995203 | -2.80362 | 1.477013 |
| H               | -4.43303 | -0.30083 | -1.40482 | H               | -3.63666 | -1.45514 | 0.603769 |
| H               | 0.766718 | 4.423829 | 0.727364 | H               | 4.265062 | -0.46623 | 2.478709 |
| H               | -0.62212 | 3.570643 | 1.418127 | H               | 3.164239 | 0.901868 | 2.256236 |
| H               | 1.025991 | 3.007048 | 1.762946 | H               | 2.526286 | -0.72195 | 2.542234 |
| H               | -0.89788 | 2.41195  | -1.7431  | H               | -1.58437 | -3.49533 | 1.004079 |
| H               | -0.51329 | -3.10767 | -2.39953 | H               | -0.05008 | -3.19421 | 1.824723 |
| 05_3R4R13S14S_4 |          |          |          | H               | -1.25104 | -1.9042  | 1.683798 |
| C               | 2.971636 | 1.969558 | -0.29842 | H               | -4.92173 | -0.36547 | 2.407211 |
| C               | 3.152275 | 0.476178 | -0.41847 | H               | -3.19869 | -0.38001 | 2.824582 |
| C               | 1.706831 | 2.538388 | -0.99529 | H               | -3.96288 | 1.113652 | 2.249756 |
| C               | -0.11342 | 1.090743 | 0.075899 | H               | -5.68204 | -0.18647 | 0.010358 |
| C               | -1.38575 | 0.921684 | 0.864546 | H               | -4.7176  | 1.278493 | -0.26305 |
| C               | 3.310631 | -0.44883 | 0.543834 | H               | -4.5183  | -0.13005 | -1.32101 |
| C               | 1.112072 | -2.42022 | -0.46382 | H               | 0.904352 | 4.330941 | 0.865233 |
| C               | 3.506125 | -1.90944 | 0.176188 | H               | -0.53367 | 3.512531 | 1.495619 |
| C               | -1.18045 | -1.83808 | -1.22392 | H               | 1.080615 | 2.852724 | 1.829671 |
| C               | -1.6054  | -0.34698 | -1.05863 | H               | -0.85955 | 2.518505 | -1.69895 |
| C               | 2.268581 | -2.81502 | 0.416518 | H               | -0.06835 | -1.22289 | -2.67747 |
| C               | -0.19296 | -2.33978 | -0.16758 | 05_3R4R13S14S_5 |          |          |          |
| C               | 0.365155 | 2.532933 | -0.2145  | C               | 2.913127 | 2.030466 | -0.49911 |
| C               | -2.23349 | 0.094241 | 0.246341 | C               | 3.104245 | 0.536385 | -0.58272 |
| C               | -3.61086 | -0.35673 | 0.674348 | C               | 1.588596 | 2.55285  | -1.10936 |
| C               | 3.313263 | -0.15572 | 2.02576  | C               | -0.11163 | 1.078097 | 0.125517 |
| C               | -0.79235 | -2.74898 | 1.157806 | C               | -1.43127 | 0.964073 | 0.848771 |
| O               | -0.4288  | 0.47288  | -1.19832 | C               | 3.380066 | -0.34914 | 0.389244 |
| C               | -3.93796 | 0.024477 | 2.124334 | C               | 1.13488  | -2.40435 | -0.35726 |
| C               | -4.69384 | 0.182723 | -0.28626 | C               | 3.56583  | -1.81842 | 0.051836 |
| C               | 0.462865 | 3.35083  | 1.075311 | C               | -1.22865 | -1.96918 | -0.94763 |
| O               | -0.61996 | 3.183413 | -1.028   | C               | -1.51818 | -0.43965 | -0.99141 |
| O               | -0.68772 | -1.96398 | -2.55833 | C               | 2.373362 | -2.73412 | 0.433617 |
| H               | 0.709811 | 0.540998 | 0.548738 | C               | -0.14385 | -2.36903 | 0.048048 |
| H               | -2.25308 | -0.13628 | -1.92065 | C               | 0.323275 | 2.523104 | -0.2267  |
| H               | 3.009804 | 2.298414 | 0.744787 | C               | -2.24891 | 0.110624 | 0.222018 |
| H               | 3.836577 | 2.443501 | -0.78653 | C               | -3.66096 | -0.28616 | 0.58581  |
| H               | 3.173845 | 0.12268  | -1.45171 | C               | 3.538207 | -0.00231 | 1.851015 |
| H               | 1.891122 | 3.588063 | -1.25369 | C               | -0.6251  | -2.70544 | 1.438927 |
| H               | 1.55126  | 2.009513 | -1.94456 | O               | -0.31448 | 0.321502 | -1.07755 |
| H               | -1.53691 | 1.381346 | 1.833939 | C               | -4.1067  | 0.271482 | 1.944351 |

|                 |          |          |          |   |          |          |          |
|-----------------|----------|----------|----------|---|----------|----------|----------|
| C               | -4.65462 | 0.123079 | -0.52354 | C | 3.569235 | -1.826   | 0.051225 |
| C               | 0.514318 | 3.340745 | 1.063647 | C | -1.21537 | -1.96373 | -0.96123 |
| O               | -0.68296 | 3.156289 | -1.03358 | C | -1.50821 | -0.43528 | -0.98209 |
| O               | -0.90641 | -2.31455 | -2.29709 | C | 2.38176  | -2.75462 | 0.417247 |
| H               | 0.696645 | 0.619499 | 0.712835 | C | -0.13341 | -2.37584 | 0.032004 |
| H               | -2.08353 | -0.28102 | -1.9208  | C | 0.304956 | 2.545062 | -0.22287 |
| H               | 3.726499 | 2.496341 | -1.07602 | C | -2.24766 | 0.099267 | 0.232247 |
| H               | 3.035373 | 2.397692 | 0.524801 | C | -3.65546 | -0.31906 | 0.590397 |
| H               | 3.019794 | 0.144457 | -1.59811 | C | 3.514829 | -0.02587 | 1.865669 |
| H               | 1.726345 | 3.602764 | -1.39709 | C | -0.61679 | -2.70787 | 1.423029 |
| H               | 1.363577 | 2.003069 | -2.02936 | O | -0.30344 | 0.326734 | -1.0539  |
| H               | -1.64508 | 1.487205 | 1.773459 | C | -4.11629 | 0.239558 | 1.943627 |
| H               | 1.319476 | -2.14958 | -1.39984 | C | -4.65124 | 0.069344 | -0.52423 |
| H               | 3.747627 | -1.92578 | -1.02493 | C | 0.487566 | 3.375149 | 1.059488 |
| H               | 4.46311  | -2.19933 | 0.560808 | O | -0.76711 | 3.106952 | -0.99785 |
| H               | -2.17008 | -2.47006 | -0.66236 | O | -0.88904 | -2.29328 | -2.31439 |
| H               | 2.679267 | -3.77182 | 0.226844 | H | 0.676628 | 0.672666 | 0.739806 |
| H               | 2.190192 | -2.68383 | 1.51271  | H | -2.07155 | -0.26362 | -1.91118 |
| H               | -3.69073 | -1.38461 | 0.651901 | H | 3.013874 | 2.380681 | 0.556592 |
| H               | 4.553349 | -0.24181 | 2.197922 | H | 3.724886 | 2.493985 | -1.0344  |
| H               | 3.354331 | 1.053363 | 2.064674 | H | 3.021051 | 0.146525 | -1.58605 |
| H               | 2.85226  | -0.59149 | 2.474707 | H | 1.750248 | 3.603785 | -1.38028 |
| H               | -1.29643 | -3.5756  | 1.418709 | H | 1.36319  | 2.007183 | -2.01381 |
| H               | 0.197107 | -2.93864 | 2.119739 | H | -1.68966 | 1.522456 | 1.756646 |
| H               | -1.19738 | -1.87778 | 1.875375 | H | 1.33119  | -2.16453 | -1.41551 |
| H               | -5.11596 | -0.0793  | 2.185322 | H | 3.758138 | -1.92224 | -1.02539 |
| H               | -3.43612 | -0.04551 | 2.750692 | H | 4.466782 | -2.20393 | 0.562071 |
| H               | -4.1289  | 1.367936 | 1.933043 | H | -2.15691 | -2.46967 | -0.68532 |
| H               | -5.66734 | -0.20593 | -0.2651  | H | 2.695704 | -3.78717 | 0.196989 |
| H               | -4.67154 | 1.212806 | -0.64437 | H | 2.195235 | -2.72035 | 1.496333 |
| H               | -4.39544 | -0.31984 | -1.49065 | H | -3.67078 | -1.41761 | 0.664325 |
| H               | 0.922008 | 4.327307 | 0.818893 | H | 4.529194 | -0.26062 | 2.218144 |
| H               | -0.44505 | 3.494787 | 1.568973 | H | 3.320575 | 1.026235 | 2.087673 |
| H               | 1.192986 | 2.855171 | 1.773749 | H | 2.82869  | -0.62595 | 2.47852  |
| H               | -1.54534 | 2.875088 | -0.68271 | H | -1.30508 | -3.56469 | 1.401768 |
| H               | -0.55655 | -3.22011 | -2.27859 | H | 0.202439 | -2.95917 | 2.101048 |
| 05_3R4R13S14S_6 |          |          |          | H | -1.17188 | -1.86991 | 1.861801 |
| C               | 2.904105 | 2.023112 | -0.4721  | H | -5.12009 | -0.12744 | 2.184309 |
| C               | 3.096385 | 0.530358 | -0.567   | H | -3.44227 | -0.05971 | 2.754036 |
| C               | 1.585767 | 2.554937 | -1.09209 | H | -4.15724 | 1.335292 | 1.924349 |
| C               | -0.13461 | 1.108879 | 0.137278 | H | -5.66117 | -0.27013 | -0.26696 |
| C               | -1.45543 | 0.979028 | 0.849227 | H | -4.67904 | 1.15751  | -0.65412 |
| C               | 3.370057 | -0.36119 | 0.399911 | H | -4.38327 | -0.37784 | -1.48714 |
| C               | 1.144807 | -2.41993 | -0.37334 | H | 0.896843 | 4.363338 | 0.814579 |

|                 |          |          |          |                 |          |          |          |
|-----------------|----------|----------|----------|-----------------|----------|----------|----------|
| H               | -0.4761  | 3.525157 | 1.554892 | H               | -4.42602 | 0.39692  | 0.829124 |
| H               | 1.170165 | 2.901228 | 1.773088 | H               | -4.92753 | -1.23982 | 0.375934 |
| H               | -0.48542 | 3.995623 | -1.26992 | H               | 1.673329 | -3.63623 | -1.03254 |
| H               | -0.54762 | -3.20219 | -2.30615 | H               | 0.113696 | -3.29576 | -1.80592 |
| 05_3R4R13S14S_7 |          |          |          | H               | 1.384366 | -2.07028 | -1.78517 |
| C               | -2.94469 | 2.013206 | -0.85006 | H               | 4.756541 | 0.253574 | -2.60959 |
| C               | -2.76434 | 0.582171 | -1.28889 | H               | 3.018449 | 0.074247 | -2.91168 |
| C               | -1.62527 | 2.811517 | -0.68152 | H               | 3.660618 | 1.606933 | -2.29309 |
| C               | 0.009492 | 1.030489 | 0.120056 | H               | 5.667639 | 0.370276 | -0.26418 |
| C               | 1.219662 | 1.03984  | -0.77338 | H               | 4.580969 | 1.704052 | 0.172694 |
| C               | -3.19218 | -0.54753 | -0.69866 | H               | 4.604734 | 0.22118  | 1.14312  |
| C               | -0.8984  | -2.31591 | 0.482226 | H               | -0.19054 | 4.355057 | 1.174921 |
| C               | -2.78864 | -1.894   | -1.2716  | H               | 1.035757 | 3.125464 | 1.553807 |
| C               | 1.465308 | -1.80434 | 1.085212 | H               | 0.908873 | 3.768078 | -0.09415 |
| C               | 1.707031 | -0.2702  | 1.075425 | H               | -0.97015 | 1.603417 | 2.2185   |
| C               | -2.08387 | -2.86709 | -0.28045 | H               | 0.801688 | -3.01106 | 2.460041 |
| C               | 0.396155 | -2.32283 | 0.119432 | 05_3R4R13S14S_8 |          |          |          |
| C               | -0.68668 | 2.371338 | 0.464671 | C               | 3.127613 | 1.774153 | -0.30301 |
| C               | 2.199622 | 0.295262 | -0.24939 | C               | 3.18178  | 0.286805 | -0.53934 |
| C               | 3.581163 | 0.01901  | -0.79655 | C               | 1.89466  | 2.473717 | -0.93204 |
| C               | -4.05733 | -0.58857 | 0.537928 | C               | 0.007752 | 1.17977  | 0.240722 |
| C               | 0.909302 | -2.86324 | -1.19348 | C               | -1.28651 | 1.178224 | 1.009113 |
| O               | 0.49951  | 0.444924 | 1.34652  | C               | 3.326245 | -0.71567 | 0.334862 |
| C               | 3.760304 | 0.516173 | -2.23731 | C               | 0.874361 | -2.42317 | -0.54796 |
| C               | 4.671252 | 0.612566 | 0.12255  | C               | 3.366629 | -2.14965 | -0.16042 |
| C               | 0.331586 | 3.473087 | 0.789918 | C               | -1.44131 | -1.65999 | -0.96538 |
| O               | -1.51408 | 2.141102 | 1.615873 | C               | -1.61523 | -0.11626 | -0.8817  |
| O               | 1.168412 | -2.11241 | 2.449792 | C               | 2.090841 | -2.97788 | 0.143652 |
| H               | -0.75502 | 0.36712  | -0.28655 | C               | -0.35643 | -2.24104 | -0.06091 |
| H               | 2.400225 | -0.07509 | 1.905288 | C               | 0.593914 | 2.575086 | -0.09398 |
| H               | -3.53681 | 2.547792 | -1.60876 | C               | -2.22332 | 0.454032 | 0.39187  |
| H               | -3.50277 | 2.073672 | 0.086381 | C               | -3.68063 | 0.35703  | 0.804877 |
| H               | -2.15981 | 0.467645 | -2.1926  | C               | 3.461533 | -0.54199 | 1.828657 |
| H               | -1.05807 | 2.80015  | -1.62295 | C               | -0.78715 | -2.59762 | 1.340901 |
| H               | -1.89789 | 3.859891 | -0.50478 | O               | -0.34851 | 0.546969 | -1.00814 |
| H               | 1.244508 | 1.54776  | -1.73101 | C               | -4.62048 | 0.71885  | -0.36252 |
| H               | -1.12625 | -1.876   | 1.451568 | C               | -4.09352 | -0.98906 | 1.432712 |
| H               | -3.68016 | -2.42062 | -1.64762 | C               | 0.809504 | 3.40182  | 1.176052 |
| H               | -2.13161 | -1.73366 | -2.13467 | O               | -0.3703  | 3.291191 | -0.87811 |
| H               | 2.425202 | -2.27463 | 0.807228 | O               | -1.2001  | -1.91227 | -2.35262 |
| H               | -2.82336 | -3.21484 | 0.451824 | H               | 0.782205 | 0.584355 | 0.74328  |
| H               | -1.79197 | -3.75424 | -0.85561 | H               | -2.21276 | 0.147605 | -1.76474 |
| H               | 3.725867 | -1.07248 | -0.80012 | H               | 3.208194 | 2.020284 | 0.760837 |
| H               | -3.51222 | -1.0032  | 1.396181 | H               | 4.018184 | 2.216462 | -0.77478 |

|                  |          |          |          |   |          |          |          |
|------------------|----------|----------|----------|---|----------|----------|----------|
| H                | 3.103234 | 0.013037 | -1.59352 | C | -4.12919 | -0.68783 | 0.351647 |
| H                | 2.160859 | 3.507478 | -1.18336 | C | 1.05141  | -2.93466 | -0.86043 |
| H                | 1.648539 | 1.978432 | -1.87947 | O | 0.603128 | 0.616069 | 1.435896 |
| H                | -1.42561 | 1.719431 | 1.93876  | C | 3.556611 | 0.131658 | -2.37728 |
| H                | 1.037537 | -2.1269  | -1.58314 | C | 4.638108 | 0.557053 | -0.12924 |
| H                | 3.52962  | -2.15505 | -1.2455  | C | 0.449931 | 3.544436 | 0.527534 |
| H                | 4.22402  | -2.67134 | 0.289494 | O | -1.40707 | 2.400713 | 1.584717 |
| H                | -2.40729 | -2.10929 | -0.68175 | O | 0.865636 | -1.76174 | 2.714362 |
| H                | 2.276933 | -4.00416 | -0.21    | H | -0.79808 | 0.365618 | -0.0586  |
| H                | 1.943182 | -3.0542  | 1.226072 | H | 2.518065 | 0.036649 | 1.889593 |
| H                | -3.81832 | 1.120175 | 1.582587 | H | -3.5285  | 2.447007 | -1.61085 |
| H                | 4.416514 | -0.95701 | 2.180544 | H | -3.4117  | 1.982625 | 0.082057 |
| H                | 3.416494 | 0.50306  | 2.145433 | H | -1.97557 | 0.41291  | -2.16046 |
| H                | 2.672365 | -1.08591 | 2.365131 | H | -1.04113 | 2.744075 | -1.71585 |
| H                | -1.62249 | -3.31102 | 1.323656 | H | -1.89317 | 3.834884 | -0.63671 |
| H                | 0.02033  | -3.04895 | 1.922274 | H | 1.100439 | 1.301939 | -1.8078  |
| H                | -1.14093 | -1.71483 | 1.885466 | H | -1.27479 | -1.85254 | 1.491182 |
| H                | -5.65652 | 0.775303 | -0.00973 | H | -3.51481 | -2.50589 | -1.77887 |
| H                | -4.35742 | 1.688069 | -0.80033 | H | -1.94571 | -1.78426 | -2.13783 |
| H                | -4.58338 | -0.0346  | -1.1584  | H | 2.283899 | -2.28391 | 1.369561 |
| H                | -5.13377 | -0.93275 | 1.774593 | H | -2.80628 | -3.29061 | 0.382142 |
| H                | -4.02823 | -1.81536 | 0.71635  | H | -1.64985 | -3.79331 | -0.83241 |
| H                | -3.46792 | -1.23755 | 2.295882 | H | 3.63645  | -1.23864 | -0.73005 |
| H                | 1.304216 | 4.347134 | 0.9279   | H | -3.69074 | -1.15413 | 1.243751 |
| H                | -0.14965 | 3.638105 | 1.645267 | H | -4.50183 | 0.29691  | 0.641791 |
| H                | 1.431044 | 2.872462 | 1.905672 | H | -4.99496 | -1.30467 | 0.072706 |
| H                | -0.67    | 2.644854 | -1.54317 | H | 1.874147 | -3.59835 | -0.56123 |
| H                | -0.94935 | -2.84734 | -2.42731 | H | 0.345459 | -3.52375 | -1.45199 |
| 05_3R4R13S14S_9  |          |          |          | H | 1.480833 | -2.17748 | -1.52725 |
| C                | -2.88588 | 1.939381 | -0.87486 | H | 4.525158 | -0.18258 | -2.78103 |
| C                | -2.66115 | 0.513401 | -1.31501 | H | 2.771373 | -0.39819 | -2.92797 |
| C                | -1.59251 | 2.787531 | -0.76656 | H | 3.44421  | 1.204065 | -2.57695 |
| C                | 0.012501 | 1.053353 | 0.183935 | H | 5.605029 | 0.248128 | -0.54214 |
| C                | 1.143372 | 0.908175 | -0.79859 | H | 4.551677 | 1.644376 | -0.23961 |
| C                | -3.13947 | -0.6267  | -0.78697 | H | 4.642939 | 0.325307 | 0.941013 |
| C                | -0.92621 | -2.31595 | 0.569926 | H | -0.02492 | 4.492328 | 0.800245 |
| C                | -2.6673  | -1.96258 | -1.33185 | H | 1.165718 | 3.275678 | 1.312127 |
| C                | 1.358473 | -1.69191 | 1.37757  | H | 1.008711 | 3.688732 | -0.40399 |
| C                | 1.752476 | -0.19863 | 1.139062 | H | -0.83474 | 1.992512 | 2.257013 |
| C                | -2.01933 | -2.91754 | -0.28565 | H | 0.288963 | -0.98293 | 2.810994 |
| 05_3R4R13S14S_10 |          |          |          |   |          |          |          |
| C                | -0.61814 | 2.451291 | 0.385301 | C | -3.05752 | 1.880472 | 0.363755 |
| C                | 2.149542 | 0.204454 | -0.26774 | C | -3.16707 | 0.391854 | 0.571899 |
| C                | 3.486991 | -0.15731 | -0.87184 | C | -1.77759 | 2.516835 | 0.964926 |



|   |          |          |          |                  |          |          |          |
|---|----------|----------|----------|------------------|----------|----------|----------|
| C | 0.03069  | 1.134334 | -0.23132 | H                | 5.233194 | -1.16369 | -1.46724 |
| C | 1.302964 | 1.073442 | -1.03274 | H                | 4.290636 | -1.7491  | -0.09513 |
| C | -3.38229 | -0.58818 | -0.32092 | H                | 3.597243 | -1.78952 | -1.7281  |
| C | -0.97979 | -2.39007 | 0.504996 | H                | -1.159   | 4.342303 | -0.92816 |
| C | -3.46499 | -2.0305  | 0.144632 | H                | 0.260082 | 3.57947  | -1.65997 |
| C | 1.378456 | -1.74973 | 0.933461 | H                | -1.34855 | 2.864422 | -1.89052 |
| C | 1.629138 | -0.21518 | 0.862629 | H                | 0.805717 | 2.585537 | 1.519864 |
| C | -2.21859 | -2.89014 | -0.19062 | H                | 0.825063 | -2.92123 | 2.386052 |
| C | 0.267389 | -2.27079 | 0.023392 | 05_3R4R13S14S_11 |          |          |          |
| C | -0.49141 | 2.556538 | 0.099498 | C                | 2.837268 | 2.351429 | 0.614494 |
| C | 2.232218 | 0.330609 | -0.42394 | C                | 2.891173 | 0.955904 | 1.188496 |
| C | 3.683507 | 0.222747 | -0.85013 | C                | 1.431915 | 2.984461 | 0.448507 |
| C | -3.55512 | -0.3787  | -1.80643 | C                | -0.17628 | 1.059814 | 0.040432 |
| C | 0.691285 | -2.65526 | -1.37402 | C                | -1.51894 | 1.224257 | 0.710853 |
| O | 0.396524 | 0.505457 | 1.017925 | C                | 3.321433 | -0.17697 | 0.604569 |
| C | 4.587055 | 1.004    | 0.128922 | C                | 1.040215 | -2.38178 | 0.759467 |
| C | 4.222601 | -1.20643 | -1.04469 | C                | 3.342267 | -1.48357 | 1.379202 |
| C | -0.69924 | 3.379067 | -1.17466 | C                | -1.26424 | -1.99339 | 0.005409 |
| O | 0.517172 | 3.239567 | 0.857314 | C                | -1.62278 | -0.62758 | -0.67405 |
| O | 1.124902 | -2.00021 | 2.319073 | C                | 2.5212   | -2.6491  | 0.761459 |
| H | -0.77903 | 0.562099 | -0.70336 | C                | 0.166947 | -2.42995 | -0.26022 |
| H | 2.254814 | 0.01174  | 1.736661 | C                | 0.500786 | 2.314285 | -0.58875 |
| H | -3.16237 | 2.152836 | -0.69145 | C                | -2.37124 | 0.283303 | 0.28893  |
| H | -3.91263 | 2.349241 | 0.874143 | C                | -3.80067 | 0.018543 | 0.69149  |
| H | -3.06561 | 0.092191 | 1.617142 | C                | 3.832815 | -0.26402 | -0.81402 |
| H | -1.98828 | 3.562106 | 1.221071 | C                | 0.484933 | -2.85156 | -1.67259 |
| H | -1.53585 | 2.009431 | 1.907157 | O                | -0.45458 | 0.120076 | -1.01718 |
| H | 1.436731 | 1.595102 | -1.97418 | C                | -4.23833 | 0.836103 | 1.913709 |
| H | -1.13499 | -2.08439 | 1.538786 | C                | -4.75932 | 0.251995 | -0.49653 |
| H | -3.61632 | -2.0546  | 1.23116  | C                | -0.5389  | 3.312187 | -1.12008 |
| H | -4.34343 | -2.51464 | -0.30633 | O                | 1.318875 | 1.883566 | -1.68435 |
| H | 2.318485 | -2.24521 | 0.645395 | O                | -2.24841 | -2.91747 | -0.4821  |
| H | -2.43338 | -3.91897 | 0.138743 | H                | 0.545221 | 0.598539 | 0.725059 |
| H | -2.08111 | -2.94451 | -1.27578 | H                | -2.1615  | -0.85252 | -1.60149 |
| H | 3.747454 | 0.72792  | -1.8233  | H                | 3.396216 | 3.016637 | 1.290384 |
| H | -4.54164 | -0.73521 | -2.13466 | H                | 3.341494 | 2.394026 | -0.35243 |
| H | -3.46351 | 0.66791  | -2.10696 | H                | 2.5444   | 0.880129 | 2.222417 |
| H | -2.81352 | -0.95395 | -2.37704 | H                | 0.912776 | 3.014269 | 1.417199 |
| H | 1.471376 | -3.42871 | -1.34556 | H                | 1.582152 | 4.030894 | 0.15341  |
| H | -0.13806 | -3.04591 | -1.96813 | H                | -1.71485 | 1.976166 | 1.466888 |
| H | 1.116109 | -1.79947 | -1.91152 | H                | 0.648911 | -2.07525 | 1.732887 |
| H | 5.61965  | 1.021955 | -0.23891 | H                | 4.384151 | -1.83013 | 1.461977 |
| H | 4.244349 | 2.03792  | 0.241853 | H                | 2.990362 | -1.30964 | 2.40436  |
| H | 4.597362 | 0.538794 | 1.121913 | H                | -1.3841  | -1.87794 | 1.091894 |

|                 |          |          |          |                 |          |          |          |
|-----------------|----------|----------|----------|-----------------|----------|----------|----------|
| H               | 2.890493 | -2.87256 | -0.24427 | H               | 3.084815 | 0.307431 | -1.52818 |
| H               | 2.726179 | -3.54341 | 1.369669 | H               | 4.519923 | -2.12911 | 0.505483 |
| H               | -3.86939 | -1.04945 | 0.949554 | H               | 3.815913 | -1.77813 | -1.07105 |
| H               | 3.120448 | -0.79942 | -1.45472 | H               | 2.784499 | 2.374687 | 0.762224 |
| H               | 3.996581 | 0.714226 | -1.26786 | H               | 3.705832 | 2.646271 | -0.7057  |
| H               | 4.77686  | -0.82502 | -0.85045 | H               | 2.271969 | -2.77634 | 1.390678 |
| H               | 0.432061 | -1.99222 | -2.35259 | H               | 2.794178 | -3.73848 | 0.020545 |
| H               | 1.477929 | -3.29814 | -1.76454 | H               | 1.749061 | 3.697612 | -1.25795 |
| H               | -0.25294 | -3.5818  | -2.02381 | H               | 1.449367 | 2.124264 | -1.97799 |
| H               | -5.26478 | 0.579579 | 2.198289 | H               | 0.692597 | 0.677967 | 0.684383 |
| H               | -3.58902 | 0.647935 | 2.775917 | H               | -1.63859 | 1.47668  | 1.784094 |
| H               | -4.2122  | 1.911394 | 1.698727 | H               | 1.373123 | -2.09403 | -1.48746 |
| H               | -5.78771 | 0.003622 | -0.2102  | H               | -2.09835 | -2.49785 | -0.71888 |
| H               | -4.73706 | 1.302027 | -0.81157 | H               | -2.10926 | -0.28218 | -1.89817 |
| H               | -4.49345 | -0.36747 | -1.35934 | H               | -3.5965  | -1.50066 | 0.712836 |
| H               | -0.02988 | 4.097643 | -1.6881  | H               | -5.03608 | -0.25942 | 2.28411  |
| H               | -1.24884 | 2.807349 | -1.78493 | H               | -3.34471 | -0.15407 | 2.806665 |
| H               | -1.10846 | 3.782268 | -0.31027 | H               | -4.11693 | 1.228949 | 2.010266 |
| H               | 0.817375 | 1.167066 | -2.11247 | H               | -5.64256 | -0.39986 | -0.15209 |
| H               | -2.13799 | -3.74438 | 0.014755 | H               | -4.71148 | 1.056628 | -0.55407 |
| 05_3R4S13R14S_3 |          |          |          | H               | -4.39833 | -0.46391 | -1.4088  |
| C               | 3.36323  | -0.31547 | 0.436455 | H               | 3.204325 | 0.965307 | 2.198427 |
| C               | 3.100705 | 0.626918 | -0.48416 | H               | 2.739543 | -0.71801 | 2.469911 |
| C               | 3.615614 | -1.74955 | 0.007501 | H               | 4.439861 | -0.29895 | 2.306281 |
| C               | 2.842085 | 2.100639 | -0.29548 | H               | -1.78815 | 3.289836 | -0.44967 |
| C               | 2.454293 | -2.732   | 0.311631 | H               | -0.56786 | 4.313316 | -1.23619 |
| C               | 1.582578 | 2.637349 | -1.01798 | H               | -1.03793 | 2.769443 | -1.97309 |
| C               | 0.251779 | 2.566689 | -0.23244 | H               | 0.642421 | 4.11257  | 0.91025  |
| C               | -0.14068 | 1.110185 | 0.11428  | H               | 0.301839 | -3.01335 | 2.017267 |
| C               | -1.43335 | 0.943153 | 0.864276 | H               | -1.08111 | -1.92606 | 1.832486 |
| C               | -2.22648 | 0.056726 | 0.255446 | H               | -1.21294 | -3.60725 | 1.323375 |
| C               | 1.204085 | -2.38306 | -0.45109 | H               | -0.48768 | -3.15505 | -2.37506 |
| C               | -0.06941 | -2.37052 | -0.02801 | 05_3R4S13R14S_4 |          |          |          |
| C               | -1.1739  | -1.96285 | -0.99832 | C               | 3.349848 | -0.3514  | 0.462507 |
| C               | -1.51224 | -0.44525 | -0.98908 | C               | 3.12379  | 0.603748 | -0.4546  |
| C               | -3.61254 | -0.40154 | 0.648272 | C               | 3.589309 | -1.78488 | 0.024618 |
| C               | -4.04889 | 0.134397 | 2.018563 | C               | 2.879323 | 2.079109 | -0.26003 |
| C               | -4.64971 | -0.0316  | -0.43458 | C               | 2.410989 | -2.75407 | 0.303984 |
| C               | 3.435488 | -0.06656 | 1.924493 | C               | 1.635666 | 2.632946 | -0.99994 |
| C               | -0.8549  | 3.276342 | -1.02085 | C               | 0.29344  | 2.573578 | -0.24442 |
| O               | 0.405701 | 3.182938 | 1.061924 | C               | -0.11899 | 1.115355 | 0.093625 |
| C               | -0.52911 | -2.74743 | 1.359726 | C               | -1.40497 | 0.951718 | 0.859223 |
| O               | -0.85903 | -2.25802 | -2.36205 | C               | -2.2163  | 0.078661 | 0.254329 |
| O               | -0.33326 | 0.359113 | -1.09449 | C               | 1.17143  | -2.37847 | -0.46429 |

|   |          |          |          |                 |          |                   |
|---|----------|----------|----------|-----------------|----------|-------------------|
| C | -0.10648 | -2.37116 | -0.05407 | 05_3R4S13R14S_5 |          |                   |
| C | -1.20104 | -1.94115 | -1.02618 | C               | 3.28434  | -0.4321 0.543255  |
| C | -1.52399 | -0.42046 | -1.00326 | C               | 3.143823 | 0.511701 -0.40348 |
| C | -3.59815 | -0.37441 | 0.666955 | C               | 3.517572 | -1.88085 0.153123 |
| C | -4.01075 | 0.154021 | 2.047436 | C               | 2.935101 | 1.997805 -0.24575 |
| C | -4.64991 | 0.007359 | -0.39772 | C               | 2.300141 | -2.81896 0.372092 |
| C | 3.389704 | -0.11703 | 1.954129 | C               | 1.695912 | 2.580901 -0.97135 |
| C | -0.78874 | 3.294381 | -1.0552  | C               | 0.355954 | 2.541234 -0.19486 |
| O | 0.516278 | 3.257768 | 1.005343 | C               | -0.1173  | 1.090768 0.052328 |
| C | -0.58073 | -2.7783  | 1.320252 | C               | -1.38002 | 0.920298 0.853415 |
| O | -0.8812  | -2.22364 | -2.39105 | C               | -2.22038 | 0.077906 0.244534 |
| O | -0.33866 | 0.37126  | -1.11708 | C               | 1.134291 | -2.42856 -0.49726 |
| H | 3.128133 | 0.293941 | -1.50181 | C               | -0.16836 | -2.35197 -0.18938 |
| H | 3.804286 | -1.80632 | -1.05125 | C               | -1.16593 | -1.85038 -1.2359  |
| H | 4.481278 | -2.18145 | 0.531604 | C               | -1.59269 | -0.36014 -1.06307 |
| H | 2.819467 | 2.351058 | 0.797399 | C               | -3.58851 | -0.39059 0.683702 |
| H | 3.752437 | 2.616165 | -0.66154 | C               | -3.91479 | 0.002991 2.130614 |
| H | 2.218256 | -2.8108  | 1.380623 | C               | -4.68603 | 0.116588 -0.27775 |
| H | 2.739013 | -3.76141 | 0.002437 | C               | 3.227621 | -0.16976 2.029835 |
| H | 1.813665 | 3.691275 | -1.22722 | C               | -0.70514 | 3.363262 -0.93442 |
| H | 1.512261 | 2.117423 | -1.95962 | O               | 0.535276 | 3.058505 1.138369 |
| H | 0.714875 | 0.668966 | 0.650882 | C               | -0.75508 | -2.75924 1.142226 |
| H | -1.59886 | 1.453178 | 1.800984 | O               | -0.67946 | -1.96745 -2.57411 |
| H | 1.353288 | -2.06545 | -1.49155 | O               | -0.41929 | 0.45848 -1.20715  |
| H | -2.13245 | -2.46975 | -0.7577  | H               | 3.208324 | 0.183486 -1.4435  |
| H | -2.13149 | -0.24473 | -1.90303 | H               | 3.804753 | -1.93267 -0.90476 |
| H | -3.58609 | -1.47383 | 0.723759 | H               | 4.364227 | -2.28319 0.728432 |
| H | -4.99559 | -0.23695 | 2.325213 | H               | 2.89222  | 2.291981 0.806611 |
| H | -3.29661 | -0.14371 | 2.823111 | H               | 3.817668 | 2.501278 -0.66865 |
| H | -4.07448 | 1.248956 | 2.047883 | H               | 2.028296 | -2.8394 1.432704  |
| H | -5.63963 | -0.35858 | -0.10199 | H               | 2.626622 | -3.84011 0.120341 |
| H | -4.70898 | 1.096543 | -0.50948 | H               | 1.900929 | 3.637462 -1.19628 |
| H | -4.41547 | -0.41994 | -1.37827 | H               | 1.553987 | 2.08631 -1.94031  |
| H | 3.162302 | 0.9148   | 2.231553 | H               | 0.709522 | 0.558787 0.538243 |
| H | 2.67471  | -0.76643 | 2.476957 | H               | -1.51958 | 1.399165 1.814652 |
| H | 4.382367 | -0.36284 | 2.357514 | H               | 1.417457 | -2.17393 -1.51698 |
| H | -1.74181 | 3.31268  | -0.51226 | H               | -2.07077 | -2.47235 -1.19702 |
| H | -0.48572 | 4.32757  | -1.25484 | H               | -2.24671 | -0.15038 -1.9216  |
| H | -0.96009 | 2.786447 | -2.00862 | H               | -3.59614 | -1.49017 0.627305 |
| H | -0.35275 | 3.446533 | 1.393602 | H               | -4.89144 | -0.39769 2.423427 |
| H | 0.242682 | -3.06336 | 1.979213 | H               | -3.16576 | -0.38159 2.831582 |
| H | -1.1334  | -1.96592 | 1.807827 | H               | -3.95422 | 1.093185 2.243295 |
| H | -1.26786 | -3.63392 | 1.257776 | H               | -5.66594 | -0.26781 0.02727  |
| H | -0.50986 | -3.12053 | -2.41089 | H               | -4.7313  | 1.212059 -0.26706 |

|                 |          |          |          |                 |          |          |          |
|-----------------|----------|----------|----------|-----------------|----------|----------|----------|
| H               | -4.50851 | -0.20425 | -1.30969 | H               | 1.610771 | 2.080618 | -1.92373 |
| H               | 3.016346 | 0.873541 | 2.274431 | H               | 0.733581 | 0.549885 | 0.50605  |
| H               | 2.45345  | -0.78423 | 2.508677 | H               | -1.47717 | 1.36492  | 1.829872 |
| H               | 4.179084 | -0.44402 | 2.506937 | H               | 1.400155 | -2.15925 | -1.52375 |
| H               | -1.64877 | 3.361196 | -0.37992 | H               | -2.09792 | -2.44556 | -1.22658 |
| H               | -0.37311 | 4.403044 | -1.04634 | H               | -2.25926 | -0.1182  | -1.9266  |
| H               | -0.88881 | 2.955513 | -1.93284 | H               | -3.59158 | -1.46269 | 0.627434 |
| H               | 0.827226 | 3.980895 | 1.052944 | H               | -4.85505 | -0.37685 | 2.449371 |
| H               | -0.0101  | -3.21741 | 1.797294 | H               | -3.12524 | -0.37839 | 2.83755  |
| H               | -1.1938  | -1.90964 | 1.677628 | H               | -3.9092  | 1.108228 | 2.271804 |
| H               | -1.56002 | -3.4934  | 0.997094 | H               | -5.65671 | -0.21601 | 0.064461 |
| H               | -0.07052 | -1.21736 | -2.69217 | H               | -4.71247 | 1.257826 | -0.22883 |
| 05_3R4S13R14S_6 |          |          |          | H               | -4.51517 | -0.15137 | -1.28605 |
| C               | 3.258634 | -0.46177 | 0.567702 | H               | 2.910761 | 0.828473 | 2.295154 |
| C               | 3.165369 | 0.492163 | -0.37475 | H               | 2.371239 | -0.84055 | 2.502906 |
| C               | 3.489318 | -1.90953 | 0.172915 | H               | 4.089409 | -0.46918 | 2.560479 |
| C               | 2.96904  | 1.979525 | -0.21362 | H               | -1.60507 | 3.381869 | -0.4284  |
| C               | 2.262269 | -2.84112 | 0.363042 | H               | -0.29957 | 4.410893 | -1.0599  |
| C               | 1.743942 | 2.576512 | -0.95443 | H               | -0.82202 | 2.965665 | -1.95779 |
| C               | 0.396    | 2.544811 | -0.20411 | H               | -0.20583 | 3.351907 | 1.483468 |
| C               | -0.09314 | 1.092781 | 0.033767 | H               | -0.05912 | -3.2555  | 1.759253 |
| C               | -1.349   | 0.922143 | 0.848387 | H               | -1.2319  | -1.93723 | 1.657686 |
| C               | -2.20711 | 0.095966 | 0.241259 | H               | -1.60589 | -3.50467 | 0.944441 |
| C               | 1.106917 | -2.42933 | -0.51082 | H               | -0.08526 | -1.19415 | -2.70696 |
| C               | -0.19804 | -2.35252 | -0.21226 | 05_3R4S13R14S_7 |          |          |          |
| C               | -1.18678 | -1.83252 | -1.25827 | C               | 3.144737 | 0.607676 | -0.78714 |
| C               | -1.59849 | -0.33854 | -1.07596 | C               | 2.66396  | -0.51454 | -1.35066 |
| C               | -3.57332 | -0.36406 | 0.69436  | C               | 2.6675   | 1.960739 | -1.2835  |
| C               | -3.87888 | 0.018778 | 2.148603 | C               | 2.893973 | -1.95672 | -0.9718  |
| C               | -4.6773  | 0.162151 | -0.24945 | C               | 2.01655  | 2.884501 | -0.21169 |
| C               | 3.149452 | -0.20958 | 2.053171 | C               | 1.594329 | -2.75973 | -0.69685 |
| C               | -0.64512 | 3.376666 | -0.9599  | C               | 0.73292  | -2.34542 | 0.517794 |
| O               | 0.651999 | 3.126248 | 1.089985 | C               | 0.013087 | -1.01065 | 0.24022  |
| C               | -0.79633 | -2.7796  | 1.108171 | C               | -1.14458 | -1.03735 | -0.72757 |
| O               | -0.69733 | -1.94285 | -2.59546 | C               | -2.17127 | -0.32651 | -0.24986 |
| O               | -0.41902 | 0.46846  | -1.22643 | C               | 0.841131 | 2.313417 | 0.554852 |
| H               | 3.263747 | 0.171266 | -1.41457 | C               | -0.45228 | 2.304796 | 0.187641 |
| H               | 4.321982 | -2.32188 | 0.761655 | C               | -1.52483 | 1.762878 | 1.138333 |
| H               | 3.79688  | -1.95587 | -0.87944 | C               | -1.76364 | 0.227519 | 1.108423 |
| H               | 2.926058 | 2.27538  | 0.837551 | C               | -3.52916 | -0.07773 | -0.8644  |
| H               | 3.85929  | 2.473797 | -0.6311  | C               | -3.60444 | -0.50342 | -2.33711 |
| H               | 1.979288 | -2.8767  | 1.420285 | C               | -4.64148 | -0.76649 | -0.04312 |
| H               | 2.58365  | -3.86061 | 0.09839  | C               | 4.146183 | 0.638303 | 0.343129 |
| H               | 1.957787 | 3.631502 | -1.16576 | C               | 1.57314  | -2.25176 | 1.800902 |

|                 |          |          |          |   |          |          |          |
|-----------------|----------|----------|----------|---|----------|----------|----------|
| O               | -0.23309 | -3.40218 | 0.668466 | C | -0.14919 | 1.106033 | 0.109309 |
| C               | -0.9632  | 2.857183 | -1.12151 | C | -1.44619 | 0.951863 | 0.854579 |
| O               | -1.2467  | 2.061308 | 2.50831  | C | -2.2423  | 0.066958 | 0.247772 |
| O               | -0.58274 | -0.49951 | 1.452877 | C | 1.183906 | -2.38758 | -0.42684 |
| H               | 1.960719 | -0.38595 | -2.17713 | C | -0.08991 | -2.36566 | -0.00562 |
| H               | 3.518256 | 2.519408 | -1.70456 | C | -1.19141 | -1.96649 | -0.9831  |
| H               | 1.952345 | 1.812009 | -2.10099 | C | -1.52516 | -0.44785 | -0.98991 |
| H               | 3.399526 | -2.46788 | -1.80495 | C | -3.63379 | -0.37822 | 0.636165 |
| H               | 3.567872 | -2.04148 | -0.11408 | C | -4.07286 | 0.169293 | 2.001036 |
| H               | 1.722547 | 3.808255 | -0.72542 | C | -4.66264 | -0.00714 | -0.45417 |
| H               | 2.786867 | 3.177455 | 0.512037 | C | 3.531121 | -0.0442  | 1.886147 |
| H               | 0.964426 | -2.7489  | -1.59592 | C | -0.83722 | 3.306002 | -0.97132 |
| H               | 1.871512 | -3.8087  | -0.53458 | O | 0.410208 | 3.259827 | 1.037283 |
| H               | 0.767724 | -0.29878 | -0.09708 | C | -0.55199 | -2.72473 | 1.386075 |
| H               | -1.10526 | -1.53883 | -1.68721 | O | -0.87415 | -2.2765  | -2.34259 |
| H               | 1.074101 | 1.871123 | 1.522037 | O | -0.34354 | 0.353919 | -1.09831 |
| H               | -2.48515 | 2.228344 | 0.852527 | H | 3.020041 | 0.257538 | -1.55424 |
| H               | -2.5076  | 0.030916 | 1.892614 | H | 3.785101 | -1.82126 | -1.07912 |
| H               | -3.72256 | 1.005227 | -0.81951 | H | 4.510857 | -2.15392 | 0.490799 |
| H               | -4.58827 | -0.26138 | -2.75391 | H | 2.920195 | 2.396715 | 0.685195 |
| H               | -2.84458 | 0.003165 | -2.9427  | H | 3.713633 | 2.597669 | -0.85009 |
| H               | -3.45477 | -1.58462 | -2.44289 | H | 2.254539 | -2.73538 | 1.42328  |
| H               | -5.62576 | -0.5383  | -0.46783 | H | 2.759475 | -3.74689 | 0.082472 |
| H               | -4.50909 | -1.85479 | -0.05435 | H | 1.746254 | 3.696164 | -1.2525  |
| H               | -4.64332 | -0.43719 | 1.001402 | H | 1.424593 | 2.128131 | -1.98789 |
| H               | 4.554202 | -0.34776 | 0.576884 | H | 0.677069 | 0.654034 | 0.681824 |
| H               | 4.989193 | 1.29614  | 0.09009  | H | -1.65491 | 1.496147 | 1.76742  |
| H               | 3.703758 | 1.041866 | 1.263821 | H | 1.354612 | -2.11583 | -1.4676  |
| H               | 0.921737 | -2.08422 | 2.663086 | H | -2.11791 | -2.49582 | -0.69983 |
| H               | 2.121999 | -3.18778 | 1.952766 | H | -2.11776 | -0.29034 | -1.90253 |
| H               | 2.291494 | -1.42634 | 1.763217 | H | -3.62615 | -1.47703 | 0.707388 |
| H               | -0.89977 | -3.06264 | 1.289907 | H | -5.06436 | -0.21538 | 2.263771 |
| H               | -0.17147 | 3.319416 | -1.71689 | H | -3.37516 | -0.12007 | 2.794637 |
| H               | -1.41409 | 2.065456 | -1.73313 | H | -4.13255 | 1.264225 | 1.985906 |
| H               | -1.74597 | 3.609649 | -0.95381 | H | -5.65943 | -0.3665  | -0.17421 |
| H               | -0.90637 | 2.97001  | 2.53271  | H | -4.71587 | 1.080698 | -0.5805  |
| 05_3R4S13R14S_8 |          |          |          | H | -4.40963 | -0.4474  | -1.42437 |
| C               | 3.385224 | -0.32339 | 0.408962 | H | 3.329944 | 0.996847 | 2.150759 |
| C               | 3.090936 | 0.600706 | -0.52049 | H | 2.853667 | -0.67444 | 2.477935 |
| C               | 3.603926 | -1.76973 | 0.001844 | H | 4.549222 | -0.28124 | 2.225521 |
| C               | 2.869859 | 2.084059 | -0.36481 | H | -1.75775 | 3.335119 | -0.38072 |
| C               | 2.432697 | -2.7277  | 0.342433 | H | -0.52805 | 4.335805 | -1.1785  |
| C               | 1.582228 | 2.634949 | -1.02829 | H | -1.04823 | 2.803399 | -1.91932 |
| C               | 0.266138 | 2.564583 | -0.21697 | H | 1.084374 | 2.794863 | 1.559109 |

|                 |          |          |          |                  |          |          |          |
|-----------------|----------|----------|----------|------------------|----------|----------|----------|
| H               | 0.278714 | -2.97424 | 2.05044  | H                | -3.21213 | -0.37711 | 2.823991 |
| H               | -1.11308 | -1.90135 | 1.844225 | H                | -3.99343 | 1.097642 | 2.225319 |
| H               | -1.22837 | -3.59077 | 1.360133 | H                | -5.68975 | -0.266   | -0.00076 |
| H               | -0.51341 | -3.17794 | -2.34738 | H                | -4.74975 | 1.211379 | -0.29069 |
| 05_3R4S13R14S_9 |          |          |          | H                | -4.52157 | -0.20759 | -1.32851 |
| C               | 3.339852 | -0.41548 | 0.495766 | H                | 3.235998 | 0.926085 | 2.221439 |
| C               | 3.106314 | 0.503808 | -0.45655 | H                | 2.747099 | -0.74128 | 2.550732 |
| C               | 3.529123 | -1.87593 | 0.123132 | H                | 4.449862 | -0.35335 | 2.344826 |
| C               | 2.931734 | 1.997067 | -0.3271  | H                | -1.65865 | 3.381458 | -0.303   |
| C               | 2.303901 | -2.78694 | 0.403583 | H                | -0.38615 | 4.412882 | -0.98779 |
| C               | 1.659497 | 2.590871 | -0.98626 | H                | -0.93929 | 2.971599 | -1.87355 |
| C               | 0.338504 | 2.540998 | -0.17863 | H                | 1.164948 | 2.623375 | 1.60754  |
| C               | -0.14316 | 1.087977 | 0.057169 | H                | 0.004784 | -3.15517 | 1.854456 |
| C               | -1.41198 | 0.922611 | 0.849795 | H                | -1.21752 | -1.88666 | 1.697174 |
| C               | -2.24578 | 0.072738 | 0.24268  | H                | -1.53298 | -3.49743 | 1.056872 |
| C               | 1.130291 | -2.41952 | -0.46566 | H                | -0.08524 | -1.25663 | -2.67811 |
| C               | -0.17154 | -2.34655 | -0.15431 | 05_3R4S13R14S_10 |          |          |          |
| C               | -1.17453 | -1.86839 | -1.20669 | C                | 3.067222 | 0.716609 | -0.84191 |
| C               | -1.60619 | -0.37743 | -1.05509 | C                | 2.592378 | -0.41888 | -1.38324 |
| C               | -3.6181  | -0.39137 | 0.672827 | C                | 2.541207 | 2.056433 | -1.32511 |
| C               | -3.95481 | 0.007117 | 2.116005 | C                | 2.874555 | -1.8541  | -1.01204 |
| C               | -4.70674 | 0.115862 | -0.29876 | C                | 1.916834 | 2.966793 | -0.22649 |
| C               | 3.442808 | -0.11803 | 1.973195 | C                | 1.604376 | -2.72067 | -0.79182 |
| C               | -0.72926 | 3.378709 | -0.8808  | C                | 0.695373 | -2.43137 | 0.43664  |
| O               | 0.51513  | 3.150358 | 1.114838 | C                | 0.029194 | -1.04833 | 0.285576 |
| C               | -0.75092 | -2.73594 | 1.185571 | C                | -1.0632  | -0.93467 | -0.75305 |
| O               | -0.69144 | -2.00608 | -2.544   | C                | -2.11453 | -0.26656 | -0.26403 |
| O               | -0.43441 | 0.44458  | -1.19933 | C                | 0.836602 | 2.334491 | 0.623905 |
| H               | 3.06211  | 0.148148 | -1.48785 | C                | -0.48588 | 2.298426 | 0.394321 |
| H               | 4.390219 | -2.28238 | 0.672601 | C                | -1.44035 | 1.649222 | 1.408098 |
| H               | 3.774293 | -1.95296 | -0.94366 | C                | -1.78689 | 0.143699 | 1.157413 |
| H               | 3.002993 | 2.327121 | 0.715959 | C                | -3.43437 | 0.056794 | -0.92424 |
| H               | 3.787983 | 2.472533 | -0.82868 | C                | -3.42682 | -0.21073 | -2.43522 |
| H               | 2.04821  | -2.75646 | 1.468311 | C                | -4.58889 | -0.71065 | -0.24178 |
| H               | 2.613105 | -3.82267 | 0.193036 | C                | 4.108441 | 0.77271  | 0.250494 |
| H               | 1.855992 | 3.650129 | -1.19264 | C                | 1.481345 | -2.51518 | 1.746884 |
| H               | 1.492188 | 2.105696 | -1.95577 | O                | -0.29192 | -3.47238 | 0.524297 |
| H               | 0.679196 | 0.548665 | 0.551465 | C                | -1.14203 | 2.922526 | -0.81508 |
| H               | -1.56397 | 1.415129 | 1.802456 | O                | -0.96165 | 1.720259 | 2.749113 |
| H               | 1.405808 | -2.18576 | -1.49229 | O                | -0.63304 | -0.63794 | 1.503447 |
| H               | -2.0766  | -2.49333 | -1.15525 | H                | 1.858326 | -0.30975 | -2.18526 |
| H               | -2.2544  | -0.17881 | -1.92041 | H                | 3.359439 | 2.630362 | -1.78803 |
| H               | -3.62739 | -1.49111 | 0.619366 | H                | 1.792299 | 1.886266 | -2.10744 |
| H               | -4.93441 | -0.39102 | 2.402185 | H                | 3.430842 | -2.33175 | -1.83305 |

|                  |          |          |          |                  |          |          |          |
|------------------|----------|----------|----------|------------------|----------|----------|----------|
| H                | 3.523794 | -1.91955 | -0.13335 | C                | 3.112755 | -0.54445 | 2.752234 |
| H                | 1.537698 | 3.864051 | -0.73078 | C                | 4.526176 | -0.77456 | 0.663049 |
| H                | 2.717651 | 3.312933 | 0.438867 | C                | -4.02975 | 0.793481 | 0.058075 |
| H                | 0.988613 | -2.68019 | -1.7021  | C                | -1.44188 | -2.08255 | -2.17097 |
| H                | 1.918665 | -3.76627 | -0.68989 | O                | 0.37104  | -3.26447 | -1.08227 |
| H                | 0.824769 | -0.333   | 0.070068 | C                | -0.68492 | 2.331907 | -1.91054 |
| H                | -0.96098 | -1.303   | -1.76802 | O                | 2.15394  | 2.435166 | -2.02876 |
| H                | 1.189587 | 1.872652 | 1.544412 | O                | 0.818902 | -0.41886 | -1.51206 |
| H                | -2.38151 | 2.215622 | 1.392198 | H                | -1.75525 | -0.79147 | 2.175913 |
| H                | -2.57768 | -0.1107  | 1.875161 | H                | -3.34126 | 2.212755 | 2.350796 |
| H                | -3.62992 | 1.129069 | -0.77229 | H                | -1.81913 | 1.392112 | 2.688974 |
| H                | -4.3862  | 0.077719 | -2.87801 | H                | -3.34261 | -2.67623 | 1.390231 |
| H                | -2.63593 | 0.35326  | -2.94222 | H                | -3.44906 | -1.89281 | -0.17155 |
| H                | -3.26995 | -1.27561 | -2.64531 | H                | -1.67564 | 3.700347 | 1.663898 |
| H                | -5.54779 | -0.43031 | -0.69185 | H                | -2.3649  | 3.085126 | 0.177642 |
| H                | -4.4579  | -1.79227 | -0.36296 | H                | -0.90509 | -3.02498 | 1.139488 |
| H                | -4.6467  | -0.4956  | 0.83023  | H                | -1.87216 | -3.83089 | -0.07685 |
| H                | 4.531    | -0.20679 | 0.486204 | H                | -0.79522 | -0.23963 | -0.2261  |
| H                | 4.937499 | 1.430706 | -0.04446 | H                | 0.769258 | -1.55246 | 1.637477 |
| H                | 3.696809 | 1.190951 | 1.17879  | H                | 0.362888 | 2.339318 | 1.424953 |
| H                | 0.798863 | -2.40711 | 2.592904 | H                | 2.169315 | 2.243038 | 0.032286 |
| H                | 1.980864 | -3.4874  | 1.820812 | H                | 2.767474 | 0.221211 | -1.56763 |
| H                | 2.239747 | -1.72896 | 1.811064 | H                | 3.514157 | 0.995556 | 1.317591 |
| H                | -0.95735 | -3.29892 | -0.16244 | H                | 4.011752 | -0.3284  | 3.33994  |
| H                | -0.45408 | 3.565312 | -1.37118 | H                | 2.264738 | -0.03858 | 3.226743 |
| H                | -1.51255 | 2.163751 | -1.5149  | H                | 2.934277 | -1.62524 | 2.803342 |
| H                | -2.00665 | 3.532369 | -0.52023 | H                | 5.427912 | -0.56979 | 1.251543 |
| H                | -0.39581 | 0.933215 | 2.85231  | H                | 4.380648 | -1.8606  | 0.627826 |
| 05_3R4S13R14S_11 |          |          |          | H                | 4.70688  | -0.42461 | -0.35889 |
| C                | -2.97471 | 0.507587 | 1.102365 | H                | -4.45006 | -0.11311 | -0.38282 |
| C                | -2.49221 | -0.71783 | 1.372963 | H                | -4.85864 | 1.362818 | 0.500811 |
| C                | -2.48008 | 1.718117 | 1.876164 | H                | -3.63634 | 1.407484 | -0.76228 |
| C                | -2.78897 | -2.03228 | 0.689838 | H                | -0.77077 | -1.77329 | -2.97794 |
| C                | -1.74389 | 2.802204 | 1.032804 | H                | -1.91707 | -3.027   | -2.4576  |
| C                | -1.53725 | -2.84243 | 0.262133 | H                | -2.21923 | -1.317   | -2.07165 |
| C                | -0.64853 | -2.27401 | -0.8683  | H                | 1.062836 | -2.81142 | -1.59562 |
| C                | 0.005543 | -0.95087 | -0.43702 | H                | -1.73059 | 2.577342 | -1.71437 |
| C                | 0.972186 | -1.01353 | 0.720446 | H                | -0.27984 | 3.096727 | -2.58327 |
| C                | 2.066068 | -0.29521 | 0.455054 | H                | -0.64317 | 1.383705 | -2.45633 |
| C                | -0.34397 | 2.438823 | 0.598202 | H                | 2.057408 | 3.398919 | -1.96198 |
| C                | 0.130818 | 2.233808 | -0.64328 | 05_3R4S13R14S_12 |          |          |          |
| C                | 1.604504 | 1.865426 | -0.83332 | C                | 3.144147 | 0.632145 | -0.77695 |
| C                | 1.889152 | 0.331881 | -0.92    | C                | 2.680198 | -0.49542 | -1.344   |
| C                | 3.299866 | -0.08445 | 1.300114 | C                | 2.662073 | 1.979979 | -1.2822  |

|   |          |          |          |                  |          |          |          |
|---|----------|----------|----------|------------------|----------|----------|----------|
| C | 2.917246 | -1.93424 | -0.95815 | H                | 0.867159 | -2.15274 | 2.656727 |
| C | 1.994177 | 2.901589 | -0.21904 | H                | 2.073312 | -3.26112 | 1.961601 |
| C | 1.621636 | -2.75247 | -0.69856 | H                | 2.271088 | -1.50183 | 1.792533 |
| C | 0.728956 | -2.37297 | 0.516491 | H                | -0.93516 | -3.30744 | 0.063776 |
| C | 0.025736 | -1.02399 | 0.247684 | H                | -0.20264 | 3.333526 | -1.71779 |
| C | -1.13187 | -1.04161 | -0.72382 | H                | -1.45429 | 2.089256 | -1.72868 |
| C | -2.16041 | -0.33571 | -0.23996 | H                | -1.76766 | 3.631221 | -0.93821 |
| C | 0.823382 | 2.319289 | 0.545431 | H                | -0.91906 | 2.976379 | 2.52618  |
| C | -0.472   | 2.312083 | 0.184893 | 05_3R4S13R14S_13 |          |          |          |
| C | -1.53713 | 1.761752 | 1.13827  | C                | 2.837804 | -0.68892 | 1.137339 |
| C | -1.74785 | 0.221081 | 1.114864 | C                | 2.459227 | 0.569615 | 1.420281 |
| C | -3.51723 | -0.08519 | -0.85467 | C                | 2.233339 | -1.86205 | 1.890718 |
| C | -3.59536 | -0.51205 | -2.32679 | C                | 2.861482 | 1.862488 | 0.749097 |
| C | -4.62853 | -0.77134 | -0.02938 | C                | 1.448241 | -2.89155 | 1.022905 |
| C | 4.129325 | 0.672701 | 0.36716  | C                | 1.674857 | 2.772145 | 0.333753 |
| C | 1.540077 | -2.31543 | 1.812442 | C                | 0.753737 | 2.301302 | -0.81614 |
| O | -0.23055 | -3.42537 | 0.722302 | C                | 0.060068 | 0.976692 | -0.45899 |
| C | -0.9917  | 2.874182 | -1.11674 | C                | -0.84566 | 0.982635 | 0.747899 |
| O | -1.26051 | 2.068035 | 2.506777 | C                | -1.97924 | 0.326751 | 0.489373 |
| O | -0.55038 | -0.47704 | 1.446972 | C                | 0.108977 | -2.42259 | 0.503502 |
| H | 1.987298 | -0.3747  | -2.18048 | C                | -0.26683 | -2.18677 | -0.76523 |
| H | 3.512418 | 2.543907 | -1.69703 | C                | -1.69637 | -1.71337 | -1.07119 |
| H | 1.955534 | 1.823572 | -2.10578 | C                | -1.91206 | -0.17206 | -0.94176 |
| H | 3.440922 | -2.44214 | -1.78227 | C                | -3.16278 | 0.069745 | 1.392138 |
| H | 3.57819  | -2.01129 | -0.08953 | C                | -2.87229 | 0.405628 | 2.861073 |
| H | 1.691389 | 3.818858 | -0.73898 | C                | -4.41421 | 0.827181 | 0.896374 |
| H | 2.757342 | 3.207553 | 0.507011 | C                | 3.873807 | -1.04753 | 0.096507 |
| H | 1.004841 | -2.73752 | -1.60908 | C                | 1.524878 | 2.162574 | -2.13876 |
| H | 1.908669 | -3.79973 | -0.54623 | O                | -0.23554 | 3.334092 | -0.95599 |
| H | 0.794483 | -0.3355  | -0.10819 | C                | 0.627653 | -2.35267 | -1.97064 |
| H | -1.0882  | -1.51277 | -1.70012 | O                | -2.14065 | -2.14987 | -2.36075 |
| H | 1.061366 | 1.868971 | 1.507616 | O                | -0.8295  | 0.569983 | -1.53243 |
| H | -2.50418 | 2.21332  | 0.853427 | H                | 1.72921  | 0.695397 | 2.222266 |
| H | -2.48315 | 0.011992 | 1.904513 | H                | 3.04096  | -2.41964 | 2.389457 |
| H | -3.70825 | 0.997874 | -0.80965 | H                | 1.573619 | -1.49025 | 2.684631 |
| H | -4.57948 | -0.26853 | -2.74167 | H                | 3.464871 | 2.45424  | 1.454319 |
| H | -2.83604 | -0.0073  | -2.93451 | H                | 3.50794  | 1.679242 | -0.11488 |
| H | -3.44854 | -1.59378 | -2.43222 | H                | 1.270641 | -3.76877 | 1.661831 |
| H | -5.61256 | -0.54356 | -0.45448 | H                | 2.089382 | -3.24323 | 0.208902 |
| H | -4.49682 | -1.85969 | -0.037   | H                | 1.048798 | 2.974013 | 1.211115 |
| H | -4.62858 | -0.43911 | 1.013944 | H                | 2.08118  | 3.743887 | 0.026001 |
| H | 4.543262 | -0.30945 | 0.606889 | H                | 0.834459 | 0.21534  | -0.34547 |
| H | 4.969567 | 1.338465 | 0.125956 | H                | -0.57271 | 1.432614 | 1.693598 |
| H | 3.66998  | 1.071929 | 1.281391 | H                | -0.64095 | -2.27566 | 1.283365 |



|                  |          |          |          |                  |          |          |          |
|------------------|----------|----------|----------|------------------|----------|----------|----------|
| H                | -2.38886 | -2.19444 | -0.37157 | H                | 1.811894 | 0.812273 | 2.167483 |
| H                | -2.81932 | 0.053189 | -1.51777 | H                | 3.475695 | -2.15328 | 2.300736 |
| H                | -3.39664 | -1.00507 | 1.336117 | H                | 1.946003 | -1.36633 | 2.682569 |
| H                | -3.7347  | 0.154349 | 3.488213 | H                | 3.346848 | 2.726152 | 1.333087 |
| H                | -2.00527 | -0.14991 | 3.235059 | H                | 3.401785 | 1.949197 | -0.23455 |
| H                | -2.66942 | 1.47588  | 2.987827 | H                | 1.812741 | -3.67354 | 1.66399  |
| H                | -5.27862 | 0.588126 | 1.526276 | H                | 2.462121 | -3.0536  | 0.161416 |
| H                | -4.25036 | 1.910375 | 0.9388   | H                | 0.891649 | 3.017405 | 1.184911 |
| H                | -4.67011 | 0.564233 | -0.13553 | H                | 1.798964 | 3.872241 | -0.04344 |
| H                | 4.389773 | -0.17376 | -0.30766 | H                | 0.802355 | 0.322246 | -0.15995 |
| H                | 4.634547 | -1.71125 | 0.529966 | H                | -0.86305 | 1.565084 | 1.633398 |
| H                | 3.433636 | -1.59154 | -0.74885 | H                | -0.24692 | -2.3295  | 1.463044 |
| H                | 0.838124 | 1.903568 | -2.9506  | H                | -2.08019 | -2.27512 | 0.125853 |
| H                | 2.010251 | 3.112832 | -2.38567 | H                | -2.71169 | -0.32103 | -1.60165 |
| H                | 2.29257  | 1.382386 | -2.08738 | H                | -3.53513 | -1.05198 | 1.263344 |
| H                | -0.95044 | 2.931392 | -1.47978 | H                | -4.11468 | 0.269631 | 3.264224 |
| H                | 1.622665 | -2.71499 | -1.70727 | H                | -2.35925 | 0.020919 | 3.198488 |
| H                | 0.187959 | -3.06204 | -2.68101 | H                | -3.05537 | 1.589334 | 2.749938 |
| H                | 0.746867 | -1.39805 | -2.49946 | H                | -5.48087 | 0.464533 | 1.132343 |
| H                | -1.66246 | -1.62161 | -3.02099 | H                | -4.44853 | 1.780063 | 0.53635  |
| 05_3R4S13R14S_14 |          |          |          | H                | -4.70854 | 0.334885 | -0.45614 |
| C                | 3.033701 | -0.45809 | 1.062282 | H                | 4.457018 | 0.195802 | -0.4587  |
| C                | 2.528037 | 0.755338 | 1.344207 | H                | 4.9126   | -1.28023 | 0.401376 |
| C                | 2.590474 | -1.67816 | 1.851096 | H                | 3.655321 | -1.33396 | -0.82685 |
| C                | 2.774901 | 2.075703 | 0.653359 | H                | 0.610938 | 1.900674 | -2.96273 |
| C                | 1.854518 | -2.77695 | 1.028194 | H                | 1.750618 | 3.166422 | -2.45348 |
| C                | 1.494204 | 2.868949 | 0.278055 | H                | 2.110102 | 1.45721  | -2.12305 |
| C                | 0.56637  | 2.327146 | -0.84725 | H                | -1.14933 | 3.159943 | -0.39946 |
| C                | -0.03455 | 0.972767 | -0.42414 | H                | 1.771605 | -2.60815 | -1.72419 |
| C                | -1.03134 | 1.021498 | 0.710777 | H                | 0.302245 | -3.15215 | -2.54658 |
| C                | -2.09645 | 0.264549 | 0.428897 | H                | 0.655293 | -1.43392 | -2.45518 |
| C                | 0.441428 | -2.43525 | 0.621242 | H                | -2.01098 | -3.50991 | -1.82047 |
| C                | -0.06538 | -2.26061 | -0.61214 | 05_3R4S13R14S_15 |          |          |          |
| C                | -1.54934 | -1.92333 | -0.77133 | C                | 2.87124  | -0.68001 | 1.11134  |
| C                | -1.85452 | -0.39597 | -0.92058 | C                | 2.474725 | 0.573813 | 1.38988  |
| C                | -3.34468 | 0.032002 | 1.245367 | C                | 2.287122 | -1.8575  | 1.872951 |
| C                | -3.20607 | 0.504175 | 2.699007 | C                | 2.854737 | 1.869227 | 0.711676 |
| C                | -4.56792 | 0.690742 | 0.569816 | C                | 1.500375 | -2.89214 | 1.013706 |
| C                | 4.063069 | -0.72034 | -0.01317 | C                | 1.654898 | 2.784994 | 0.346258 |
| C                | 1.309697 | 2.201686 | -2.17872 | C                | 0.6876   | 2.361188 | -0.79774 |
| O                | -0.46774 | 3.299291 | -1.07846 | C                | 0.041152 | 1.002489 | -0.46931 |
| C                | 0.71928  | -2.37367 | -1.89734 | C                | -0.8646  | 0.981195 | 0.740318 |
| O                | -2.12584 | -2.55141 | -1.9242  | C                | -1.98453 | 0.301258 | 0.477557 |
| O                | -0.77689 | 0.350305 | -1.49258 | C                | 0.154432 | -2.43147 | 0.504308 |

|   |          |          |          |                 |          |                   |
|---|----------|----------|----------|-----------------|----------|-------------------|
| C | -0.2316  | -2.19898 | -0.76188 | 05_3R4S13S14R_3 |          |                   |
| C | -1.66963 | -1.74814 | -1.05953 | C               | -2.80822 | 0.879468 1.117618 |
| C | -1.89619 | -0.20544 | -0.94967 | C               | -2.42092 | -0.35176 1.494128 |
| C | -3.16232 | 0.018172 | 1.379215 | C               | -2.1413  | 2.109711 1.711221 |
| C | -2.88576 | 0.367736 | 2.847609 | C               | -2.88569 | -1.6983 0.989029  |
| C | -4.431   | 0.740183 | 0.87389  | C               | -1.37283 | 3.017289 0.702304 |
| C | 3.909453 | -1.02717 | 0.069027 | C               | -1.74396 | -2.67926 0.611612 |
| C | 1.403999 | 2.30795  | -2.14853 | C               | -0.87546 | -2.35535 -0.62588 |
| O | -0.31192 | 3.38481  | -0.93426 | C               | -0.12199 | -1.02832 -0.4397  |
| C | 0.657874 | -2.35241 | -1.97249 | C               | 0.850848 | -0.9479 0.709429  |
| O | -2.11961 | -2.20534 | -2.33971 | C               | 1.985261 | -0.35251 0.330681 |
| O | -0.8158  | 0.534069 | -1.5348  | C               | -0.07989 | 2.442347 0.175262 |
| H | 1.747538 | 0.692161 | 2.195836 | C               | 0.209298 | 2.049085 -1.07741 |
| H | 3.104909 | -2.40815 | 2.362671 | C               | 1.600018 | 1.523762 -1.44152 |
| H | 1.633128 | -1.49061 | 2.673911 | C               | 1.84344  | 0.007065 -1.14196 |
| H | 3.486891 | 2.455298 | 1.396541 | C               | 3.227466 | -0.09067 1.151733 |
| H | 3.467257 | 1.689575 | -0.17767 | C               | 3.046261 | -0.46035 2.630218 |
| H | 1.332619 | -3.76974 | 1.654761 | C               | 4.451736 | -0.82081 0.55845  |
| H | 2.136183 | -3.24124 | 0.194477 | C               | -3.91931 | 1.154655 0.130727 |
| H | 1.058794 | 2.96177  | 1.251836 | C               | -1.71567 | -2.31802 -1.91286 |
| H | 2.049747 | 3.76622  | 0.056108 | O               | 0.07349  | -3.43079 -0.71722 |
| H | 0.854152 | 0.283836 | -0.33769 | C               | -0.74502 | 2.094664 -2.24758 |
| H | -0.59756 | 1.418944 | 1.694496 | O               | 2.662889 | 2.223875 -0.7913  |
| H | -0.59259 | -2.29387 | 1.288968 | O               | 0.719402 | -0.7667 -1.593    |
| H | -2.3496  | -2.2304  | -0.3487  | H               | -1.63578 | -0.40931 2.250555 |
| H | -2.80217 | 0.006559 | -1.53376 | H               | -2.90981 | 2.74065 2.183226  |
| H | -3.3678  | -1.06223 | 1.32667  | H               | -1.45199 | 1.80631 2.509028  |
| H | -3.74406 | 0.097033 | 3.472078 | H               | -3.46118 | -2.1947 1.785323  |
| H | -2.00668 | -0.16419 | 3.227576 | H               | -3.57583 | -1.59101 0.146461 |
| H | -2.71125 | 1.44341  | 2.971453 | H               | -1.13701 | 3.949446 1.235876 |
| H | -5.29042 | 0.482614 | 1.50304  | H               | -2.04303 | 3.302428 -0.11451 |
| H | -4.29595 | 1.827666 | 0.909708 | H               | -1.07765 | -2.80834 1.472784 |
| H | -4.6759  | 0.464153 | -0.15702 | H               | -2.18937 | -3.6653 0.427864  |
| H | 4.397224 | -0.14635 | -0.35439 | H               | -0.86532 | -0.232 -0.36694   |
| H | 4.692035 | -1.66067 | 0.508956 | H               | 0.628308 | -1.31141 1.704142 |
| H | 3.479881 | -1.59925 | -0.76301 | H               | 0.713487 | 2.352222 0.917259 |
| H | 0.690301 | 2.058045 | -2.93732 | H               | 1.707839 | 1.633967 -2.5329  |
| H | 1.848176 | 3.283394 | -2.3748  | H               | 2.714772 | -0.30063 -1.7326  |
| H | 2.199959 | 1.556297 | -2.14889 | H               | 3.432827 | 0.984435 1.08836  |
| H | -0.98363 | 3.221806 | -0.25051 | H               | 3.949559 | -0.20933 3.197519 |
| H | 1.660514 | -2.69738 | -1.71493 | H               | 2.204653 | 0.078711 3.079717 |
| H | 0.225839 | -3.07024 | -2.67912 | H               | 2.864058 | -1.53516 2.753509 |
| H | 0.75651  | -1.39605 | -2.50188 | H               | 5.347856 | -0.60075 1.150227 |
| H | -1.65726 | -1.67656 | -3.01081 | H               | 4.300393 | -1.90721 0.563704 |

|                 |          |          |          |                 |          |          |          |
|-----------------|----------|----------|----------|-----------------|----------|----------|----------|
| H               | 4.650685 | -0.51015 | -0.47255 | H               | -2.14332 | -3.69123 | 0.463334 |
| H               | -4.41882 | 0.246273 | -0.21326 | H               | -0.88269 | -0.30838 | -0.35625 |
| H               | -4.68214 | 1.799672 | 0.588966 | H               | 0.658933 | -1.28833 | 1.707375 |
| H               | -3.55695 | 1.689041 | -0.75644 | H               | 0.655865 | 2.394256 | 0.918576 |
| H               | -1.06894 | -2.16102 | -2.78165 | H               | 1.669463 | 1.682947 | -2.5253  |
| H               | -2.24082 | -3.27081 | -2.0398  | H               | 2.704387 | -0.24309 | -1.74765 |
| H               | -2.45713 | -1.51133 | -1.89635 | H               | 3.378237 | 1.072081 | 1.096686 |
| H               | 0.777906 | -3.09616 | -1.30005 | H               | 3.969729 | -0.14179 | 3.176832 |
| H               | -1.73946 | 2.456175 | -1.9785  | H               | 2.213458 | 0.070609 | 3.079525 |
| H               | -0.35454 | 2.747168 | -3.04109 | H               | 2.940758 | -1.50544 | 2.714023 |
| H               | -0.85186 | 1.096198 | -2.68806 | H               | 5.367217 | -0.4216  | 1.115981 |
| H               | 2.474655 | 3.171973 | -0.88067 | H               | 4.380744 | -1.76103 | 0.499376 |
| 05_3R4S13S14R_4 |          |          |          | H               | 4.657315 | -0.32168 | -0.50092 |
| C               | -2.85604 | 0.865255 | 1.08707  | H               | -4.42657 | 0.208086 | -0.27929 |
| C               | -2.44065 | -0.36095 | 1.448897 | H               | -4.77527 | 1.706047 | 0.592616 |
| C               | -2.21299 | 2.102468 | 1.691238 | H               | -3.64319 | 1.71953  | -0.75129 |
| C               | -2.87657 | -1.71155 | 0.92972  | H               | -0.87088 | -2.34965 | -2.75351 |
| C               | -1.44304 | 3.017158 | 0.690415 | H               | -2.01823 | -3.4933  | -2.02139 |
| C               | -1.71442 | -2.69462 | 0.62449  | H               | -2.34457 | -1.74744 | -1.96739 |
| C               | -0.78671 | -2.4276  | -0.59632 | H               | 0.917105 | -3.23305 | -0.0675  |
| C               | -0.09454 | -1.06046 | -0.44686 | H               | -1.80615 | 2.380607 | -1.96996 |
| C               | 0.875395 | -0.94056 | 0.704591 | H               | -0.43582 | 2.730011 | -3.03493 |
| C               | 1.993569 | -0.31551 | 0.32002  | H               | -0.8627  | 1.059206 | -2.68045 |
| C               | -0.13906 | 2.456284 | 0.175138 | H               | 2.405568 | 3.226126 | -0.87195 |
| C               | 0.158507 | 2.053259 | -1.07228 | 05_3R4S13S14R_5 |          |          |          |
| C               | 1.561858 | 1.562702 | -1.43501 | C               | -3.49123 | 0.116806 | -0.35127 |
| C               | 1.831138 | 0.046731 | -1.15015 | C               | -2.75002 | 1.069705 | -0.94236 |
| C               | 3.226266 | -0.01272 | 1.140078 | C               | -3.74501 | -1.21194 | -1.03849 |
| C               | 3.073718 | -0.42109 | 2.611516 | C               | -2.4433  | 2.455223 | -0.4111  |
| C               | 4.47981  | -0.66873 | 0.522071 | C               | -3.02624 | -2.43677 | -0.40729 |
| C               | -3.97756 | 1.125315 | 0.108186 | C               | -1.3474  | 2.586684 | 0.679022 |
| C               | -1.55613 | -2.50549 | -1.91673 | C               | 0.130238 | 2.558866 | 0.236858 |
| O               | 0.183557 | -3.48729 | -0.65294 | C               | 0.5365   | 1.18191  | -0.35365 |
| C               | -0.79808 | 2.061461 | -2.24129 | C               | 1.993726 | 0.98444  | -0.68528 |
| O               | 2.607709 | 2.281318 | -0.77807 | C               | 2.460925 | -0.14096 | -0.1358  |
| O               | 0.717732 | -0.73684 | -1.59618 | C               | -1.53267 | -2.32665 | -0.54739 |
| H               | -1.65529 | -0.40916 | 2.206031 | C               | -0.57757 | -2.46915 | 0.381409 |
| H               | -2.99411 | 2.724256 | 2.154487 | C               | 0.874142 | -2.1733  | 0.01963  |
| H               | -1.52932 | 1.806346 | 2.496633 | C               | 1.324282 | -0.80468 | 0.625125 |
| H               | -3.49734 | -2.20185 | 1.695606 | C               | 3.836686 | -0.75342 | -0.2336  |
| H               | -3.5182  | -1.61072 | 0.048508 | C               | 4.738005 | -0.0329  | -1.2449  |
| H               | -1.22189 | 3.952281 | 1.224941 | C               | 4.518957 | -0.82491 | 1.149737 |
| H               | -2.10761 | 3.294542 | -0.13369 | C               | -4.13064 | 0.277949 | 1.007806 |
| H               | -1.0845  | -2.78496 | 1.519687 | C               | 1.018599 | 2.94116  | 1.427389 |

|                 |          |          |          |   |          |          |          |
|-----------------|----------|----------|----------|---|----------|----------|----------|
| O               | 0.25883  | 3.538934 | -0.81042 | C | 0.860192 | 1.26466  | -0.65908 |
| C               | -0.80993 | -2.83717 | 1.825352 | C | 2.292016 | 0.803612 | -0.63962 |
| O               | 1.110962 | -2.13352 | -1.38559 | C | 2.398006 | -0.40239 | -0.07619 |
| O               | 0.267635 | 0.154717 | 0.607666 | C | -1.90675 | -2.03055 | -0.83423 |
| H               | -2.33694 | 0.837331 | -1.92448 | C | -0.94082 | -2.42711 | 0.006298 |
| H               | -4.82573 | -1.41886 | -1.0357  | C | 0.517116 | -2.14603 | -0.33756 |
| H               | -3.44242 | -1.14207 | -2.09119 | C | 1.014414 | -0.85193 | 0.358689 |
| H               | -2.17669 | 3.109087 | -1.24836 | C | 3.628551 | -1.25477 | 0.120472 |
| H               | -3.35892 | 2.880137 | 0.021374 | C | 4.875612 | -0.6567  | -0.54454 |
| H               | -3.38657 | -3.33269 | -0.93635 | C | 3.891524 | -1.53171 | 1.616455 |
| H               | -3.33122 | -2.55432 | 0.63795  | C | -3.79077 | 0.220628 | 1.578816 |
| H               | -1.49884 | 3.554531 | 1.174656 | C | 1.019391 | 2.73334  | 1.420453 |
| H               | -1.4866  | 1.812259 | 1.439935 | O | 1.494381 | 3.583236 | -0.73502 |
| H               | -0.08216 | 1.027441 | -1.25084 | C | -1.15542 | -3.09985 | 1.339717 |
| H               | 2.546352 | 1.648032 | -1.34174 | O | 0.760894 | -1.99544 | -1.73227 |
| H               | -1.20471 | -2.03018 | -1.54333 | O | 0.154865 | 0.251984 | 0.063759 |
| H               | 1.520938 | -2.9437  | 0.475677 | H | -2.51391 | 1.435976 | -1.42713 |
| H               | 1.57497  | -0.99324 | 1.678526 | H | -5.09761 | -0.72452 | -0.69035 |
| H               | 3.698611 | -1.78602 | -0.58634 | H | -3.84092 | -0.32251 | -1.86015 |
| H               | 5.706133 | -0.54003 | -1.32273 | H | -2.78968 | 3.316111 | 0.581738 |
| H               | 4.282787 | -0.01345 | -2.24087 | H | -1.75199 | 2.198851 | 1.433827 |
| H               | 4.929074 | 1.002829 | -0.93779 | H | -3.86354 | -2.71849 | -1.39595 |
| H               | 5.493457 | -1.32017 | 1.069421 | H | -3.67436 | -2.46732 | 0.33222  |
| H               | 4.681913 | 0.181273 | 1.554284 | H | -1.02207 | 3.216939 | -1.35548 |
| H               | 3.919266 | -1.38573 | 1.874967 | H | -0.79345 | 4.251471 | 0.041776 |
| H               | -4.0526  | 1.298015 | 1.393099 | H | 0.482932 | 1.296757 | -1.69845 |
| H               | -5.1953  | 0.00833  | 0.973328 | H | 3.092888 | 1.39337  | -1.06717 |
| H               | -3.66419 | -0.38679 | 1.74764  | H | -1.58087 | -1.54632 | -1.75422 |
| H               | 2.073775 | 2.990953 | 1.132919 | H | 1.135379 | -2.97048 | 0.06172  |
| H               | 0.723329 | 3.919514 | 1.820435 | H | 0.969435 | -1.03942 | 1.442433 |
| H               | 0.932507 | 2.200096 | 2.227961 | H | 3.427607 | -2.22451 | -0.36078 |
| H               | 1.206338 | 3.694782 | -0.95095 | H | 5.732761 | -1.32815 | -0.42218 |
| H               | -1.84283 | -3.13605 | 2.018583 | H | 4.718977 | -0.49648 | -1.61658 |
| H               | -0.15973 | -3.66861 | 2.129991 | H | 5.138482 | 0.307265 | -0.0923  |
| H               | -0.57836 | -1.99419 | 2.490434 | H | 4.761232 | -2.18792 | 1.735919 |
| H               | 0.766537 | -2.96489 | -1.75102 | H | 4.095427 | -0.59682 | 2.152211 |
| 05_3R4S13S14R_6 |          |          |          | H | 3.038349 | -2.01823 | 2.101594 |
| C               | -3.44454 | 0.401886 | 0.120516 | H | -3.39463 | 1.019195 | 2.210721 |
| C               | -2.68116 | 1.399762 | -0.34894 | H | -4.88089 | 0.193886 | 1.71859  |
| C               | -4.00828 | -0.6426  | -0.82395 | H | -3.40471 | -0.73183 | 1.966181 |
| C               | -2.03713 | 2.526667 | 0.428878 | H | 2.084069 | 2.50407  | 1.525529 |
| C               | -3.39747 | -2.06149 | -0.64606 | H | 0.840857 | 3.736679 | 1.821245 |
| C               | -0.83241 | 3.20081  | -0.27049 | H | 0.452917 | 2.01014  | 2.012207 |
| C               | 0.607306 | 2.67146  | -0.0482  | H | 1.190376 | 3.643846 | -1.65651 |

|                 |          |          |          |                 |          |          |          |
|-----------------|----------|----------|----------|-----------------|----------|----------|----------|
| H               | -2.21123 | -3.27485 | 1.558431 | H               | 4.834337 | -0.5748  | -1.53132 |
| H               | -0.64232 | -4.07102 | 1.373798 | H               | 5.190402 | 0.187438 | 0.030277 |
| H               | -0.7416  | -2.50172 | 2.163397 | H               | 4.616358 | -2.3217  | 1.784669 |
| H               | 0.304648 | -2.7284  | -2.17676 | H               | 3.97489  | -0.71935 | 2.195299 |
| 05_3R4S13S14R_7 |          |          |          | H               | 2.880216 | -2.10579 | 2.047208 |
| C               | -3.46797 | 0.405249 | 0.036721 | H               | -3.60693 | 1.213925 | 2.058319 |
| C               | -2.57471 | 1.301247 | -0.41136 | H               | -5.12249 | 0.565887 | 1.415143 |
| C               | -3.98577 | -0.69987 | -0.86502 | H               | -3.86075 | -0.53331 | 1.954624 |
| C               | -1.979   | 2.464229 | 0.357448 | H               | 2.066    | 2.303751 | 1.601056 |
| C               | -3.44669 | -2.12424 | -0.53233 | H               | 0.794021 | 3.491925 | 1.95375  |
| C               | -0.75505 | 3.151855 | -0.29436 | H               | 0.411965 | 1.761993 | 1.950007 |
| C               | 0.683889 | 2.628165 | -0.03622 | H               | 1.438735 | 4.424544 | -0.28809 |
| C               | 0.981958 | 1.301409 | -0.78117 | H               | -2.16853 | -2.97002 | 1.819545 |
| C               | 2.392729 | 0.785999 | -0.69208 | H               | -0.43591 | -3.27307 | 1.986985 |
| C               | 2.428051 | -0.42667 | -0.13017 | H               | -1.06602 | -1.63692 | 2.172723 |
| C               | -1.96714 | -2.21262 | -0.77905 | H               | 0.342272 | -1.29313 | -2.03319 |
| C               | -0.97828 | -2.33677 | 0.115087 | 05_3R4S13S14R_8 |          |          |          |
| C               | 0.475501 | -2.14817 | -0.31617 | C               | -3.43318 | 0.358274 | 0.043965 |
| C               | 1.017087 | -0.81752 | 0.270179 | C               | -2.6983  | 1.370747 | -0.43982 |
| C               | 3.616024 | -1.32241 | 0.123876 | C               | -3.95441 | -0.72599 | -0.88002 |
| C               | 4.920251 | -0.7583  | -0.45494 | C               | -2.12931 | 2.552096 | 0.313687 |
| C               | 3.776271 | -1.636   | 1.627002 | C               | -3.33637 | -2.13134 | -0.63685 |
| C               | -4.03274 | 0.420779 | 1.438436 | C               | -0.88644 | 3.213298 | -0.32209 |
| C               | 1.006906 | 2.536684 | 1.457688 | C               | 0.524872 | 2.661738 | -0.02026 |
| O               | 1.592054 | 3.548193 | -0.67736 | C               | 0.788077 | 1.255015 | -0.6368  |
| C               | -1.17845 | -2.5648  | 1.595671 | C               | 2.231824 | 0.82653  | -0.67314 |
| O               | 0.668476 | -2.15608 | -1.72337 | C               | 2.397429 | -0.36015 | -0.08294 |
| O               | 0.187761 | 0.234793 | -0.24982 | C               | -1.84298 | -2.09111 | -0.79436 |
| H               | -2.24912 | 1.212183 | -1.4482  | C               | -0.89016 | -2.44735 | 0.078417 |
| H               | -5.0843  | -0.73638 | -0.81047 | C               | 0.569763 | -2.16173 | -0.25133 |
| H               | -3.7309  | -0.4717  | -1.9079  | C               | 1.044969 | -0.84001 | 0.412718 |
| H               | -2.75141 | 3.241614 | 0.462652 | C               | 3.658644 | -1.17413 | 0.075272 |
| H               | -1.73431 | 2.165934 | 1.383402 | C               | 4.849477 | -0.57928 | -0.6884  |
| H               | -3.97973 | -2.83702 | -1.17815 | C               | 4.013576 | -1.37499 | 1.564569 |
| H               | -3.70459 | -2.38568 | 0.499271 | C               | -3.80253 | 0.202391 | 1.499901 |
| H               | -0.89937 | 3.207083 | -1.3819  | C               | 0.851063 | 2.695928 | 1.475052 |
| H               | -0.74554 | 4.194254 | 0.057094 | O               | 1.378155 | 3.591142 | -0.72794 |
| H               | 0.691131 | 1.467914 | -1.83081 | C               | -1.12241 | -3.06888 | 1.43324  |
| H               | 3.235904 | 1.349761 | -1.07116 | O               | 0.830187 | -2.05194 | -1.64685 |
| H               | -1.6779  | -2.07023 | -1.81953 | O               | 0.143971 | 0.232392 | 0.13131  |
| H               | 1.087893 | -2.97198 | 0.07516  | H               | -2.51159 | 1.385184 | -1.51538 |
| H               | 0.917906 | -0.85329 | 1.365653 | H               | -5.04643 | -0.81513 | -0.77441 |
| H               | 3.408626 | -2.27531 | -0.3875  | H               | -3.76125 | -0.43908 | -1.92149 |
| H               | 5.743588 | -1.46328 | -0.29574 | H               | -2.90332 | 3.335147 | 0.351798 |

|                 |          |          |          |                  |          |          |          |
|-----------------|----------|----------|----------|------------------|----------|----------|----------|
| H               | -1.92657 | 2.296067 | 1.358682 | C                | 4.870926 | -0.62719 | -0.5875  |
| H               | -3.77938 | -2.81935 | -1.37276 | C                | 3.925947 | -1.46698 | 1.604612 |
| H               | -3.63089 | -2.50482 | 0.349248 | C                | -3.78784 | 0.217235 | 1.551149 |
| H               | -1.00593 | 3.237212 | -1.41408 | C                | 0.945609 | 2.685448 | 1.446208 |
| H               | -0.85514 | 4.261794 | -0.0017  | O                | 1.486944 | 3.504798 | -0.78098 |
| H               | 0.369055 | 1.270142 | -1.65656 | C                | -1.14065 | -3.07618 | 1.385855 |
| H               | 3.000606 | 1.395727 | -1.18295 | O                | 0.786256 | -2.03216 | -1.70069 |
| H               | -1.50428 | -1.63523 | -1.72417 | O                | 0.148811 | 0.246027 | 0.058394 |
| H               | 1.192073 | -2.96638 | 0.180711 | H                | -2.51826 | 1.415603 | -1.46617 |
| H               | 1.040911 | -1.01355 | 1.499834 | H                | -5.07714 | -0.7583  | -0.71668 |
| H               | 3.454313 | -2.16834 | -0.35009 | H                | -3.81024 | -0.37157 | -1.88038 |
| H               | 5.728499 | -1.22543 | -0.5876  | H                | -2.83785 | 3.337977 | 0.462756 |
| H               | 4.626403 | -0.47206 | -1.75529 | H                | -1.83477 | 2.259344 | 1.40087  |
| H               | 5.116244 | 0.409761 | -0.29597 | H                | -3.83638 | -2.76051 | -1.37717 |
| H               | 4.906135 | -2.00341 | 1.662251 | H                | -3.65741 | -2.48091 | 0.347766 |
| H               | 4.222299 | -0.41153 | 2.045138 | H                | -0.99749 | 3.224362 | -1.38923 |
| H               | 3.202692 | -1.85903 | 2.119608 | H                | -0.82049 | 4.2521   | 0.020457 |
| H               | -3.44894 | 1.029686 | 2.11966  | H                | 0.452238 | 1.301795 | -1.70355 |
| H               | -4.89366 | 0.13919  | 1.618856 | H                | 3.064884 | 1.403043 | -1.11292 |
| H               | -3.39037 | -0.72533 | 1.918736 | H                | -1.5552  | -1.59537 | -1.74518 |
| H               | 1.894794 | 2.405785 | 1.648235 | H                | 1.157559 | -2.96559 | 0.115784 |
| H               | 0.704386 | 3.707686 | 1.867988 | H                | 0.988292 | -1.0123  | 1.453795 |
| H               | 0.220899 | 2.002189 | 2.036962 | H                | 3.439707 | -2.20315 | -0.35173 |
| H               | 2.286054 | 3.434486 | -0.4225  | H                | 5.735546 | -1.28904 | -0.46505 |
| H               | -2.17838 | -3.26865 | 1.629257 | H                | 4.696758 | -0.48888 | -1.65983 |
| H               | -0.58016 | -4.02016 | 1.525289 | H                | 5.132384 | 0.347558 | -0.15802 |
| H               | -0.75271 | -2.42122 | 2.24041  | H                | 4.802779 | -2.11356 | 1.724897 |
| H               | 0.383492 | -2.80057 | -2.07469 | H                | 4.129722 | -0.51959 | 2.118073 |
| 05_3R4S13S14R_9 |          |          |          | H                | 3.083896 | -1.95019 | 2.112058 |
| C               | -3.43734 | 0.386483 | 0.092327 | H                | -3.41189 | 1.031305 | 2.175478 |
| C               | -2.68968 | 1.391105 | -0.38836 | H                | -4.87793 | 0.16982  | 1.685469 |
| C               | -3.98662 | -0.67598 | -0.84097 | H                | -3.38439 | -0.72212 | 1.95235  |
| C               | -2.07748 | 2.546    | 0.372534 | H                | 1.997256 | 2.415445 | 1.581508 |
| C               | -3.3755  | -2.0907  | -0.63548 | H                | 0.792329 | 3.691335 | 1.857006 |
| C               | -0.84788 | 3.200163 | -0.30135 | H                | 0.333818 | 1.984594 | 2.020752 |
| C               | 0.580729 | 2.657242 | -0.04082 | H                | 1.332515 | 4.41691  | -0.48598 |
| C               | 0.839394 | 1.262623 | -0.67166 | H                | -2.19654 | -3.25648 | 1.600075 |
| C               | 2.275413 | 0.813261 | -0.66517 | H                | -0.61819 | -4.04091 | 1.448109 |
| C               | 2.398342 | -0.38421 | -0.08715 | H                | -0.7398  | -2.45361 | 2.197798 |
| C               | -1.88412 | -2.06023 | -0.81632 | H                | 0.3351   | -2.77644 | -2.13135 |
| C               | -0.92152 | -2.43398 | 0.038249 | 05_3R4S13S14R_10 |          |          |          |
| C               | 0.536788 | -2.15343 | -0.30436 | C                | -3.46133 | 0.386548 | 0.019986 |
| C               | 1.023725 | -0.84182 | 0.366606 | C                | -2.58804 | 1.297591 | -0.43758 |
| C               | 3.638932 | -1.22252 | 0.107337 | C                | -3.96557 | -0.73125 | -0.87423 |

|   |          |          |          |                  |          |          |          |
|---|----------|----------|----------|------------------|----------|----------|----------|
| C | -2.01723 | 2.482261 | 0.316368 | H                | 1.980133 | 2.29024  | 1.65748  |
| C | -3.42069 | -2.14978 | -0.52679 | H                | 0.703278 | 3.485217 | 1.970362 |
| C | -0.78204 | 3.166847 | -0.31339 | H                | 0.322777 | 1.748789 | 1.945537 |
| C | 0.642364 | 2.634868 | -0.02237 | H                | 2.396073 | 3.476019 | -0.30812 |
| C | 0.951119 | 1.306873 | -0.77013 | H                | -2.147   | -2.98204 | 1.832973 |
| C | 2.369913 | 0.804985 | -0.69724 | H                | -0.41477 | -3.28509 | 2.00438  |
| C | 2.427808 | -0.40552 | -0.13133 | H                | -1.04512 | -1.64846 | 2.186276 |
| C | -1.9399  | -2.23264 | -0.76736 | H                | 0.360876 | -1.31227 | -2.02153 |
| C | -0.95343 | -2.35158 | 0.130084 | 05_3R4S13S14R_11 |          |          |          |
| C | 0.500203 | -2.15369 | -0.29728 | C                | -2.80888 | 0.878289 | 1.11747  |
| C | 1.025651 | -0.81344 | 0.282875 | C                | -2.42042 | -0.3526  | 1.493904 |
| C | 3.628432 | -1.28823 | 0.105976 | C                | -2.14264 | 2.109115 | 1.710664 |
| C | 4.919957 | -0.71048 | -0.48745 | C                | -2.88439 | -1.69958 | 0.989258 |
| C | 3.80891  | -1.60213 | 1.606859 | C                | -1.37476 | 3.016807 | 0.701367 |
| C | -4.02247 | 0.398983 | 1.423294 | C                | -1.74207 | -2.68003 | 0.612311 |
| C | 0.925641 | 2.53235  | 1.478431 | C                | -0.87366 | -2.35607 | -0.6252  |
| O | 1.490476 | 3.64313  | -0.61565 | C                | -0.12101 | -1.02849 | -0.43955 |
| C | -1.15644 | -2.57732 | 1.610499 | C                | 0.851839 | -0.94707 | 0.709488 |
| O | 0.699087 | -2.16763 | -1.70374 | C                | 1.98585  | -0.35112 | 0.330411 |
| O | 0.178636 | 0.224509 | -0.23407 | C                | -0.08149 | 2.442485 | 0.174482 |
| H | -2.26654 | 1.208553 | -1.47598 | C                | 0.207771 | 2.048823 | -1.07806 |
| H | -5.0642  | -0.77433 | -0.82497 | C                | 1.598871 | 1.524511 | -1.44216 |
| H | -3.70725 | -0.51056 | -1.91787 | C                | 1.843596 | 0.008029 | -1.14229 |
| H | -2.79603 | 3.258239 | 0.376402 | C                | 3.228232 | -0.08876 | 1.151003 |
| H | -1.80357 | 2.214418 | 1.357377 | C                | 3.046313 | -0.45415 | 2.630466 |
| H | -3.94759 | -2.87076 | -1.16855 | C                | 4.451449 | -0.82248 | 0.559911 |
| H | -3.68116 | -2.40376 | 0.505957 | C                | -3.92079 | 1.152546 | 0.131277 |
| H | -0.90629 | 3.215944 | -1.40403 | C                | -1.71369 | -2.31981 | -1.91232 |
| H | -0.7625  | 4.207748 | 0.03125  | O                | 0.075978 | -3.43098 | -0.71583 |
| H | 0.649572 | 1.470351 | -1.81703 | C                | -0.74684 | 2.093    | -2.24803 |
| H | 3.208018 | 1.355907 | -1.10919 | O                | 2.661182 | 2.225839 | -0.7923  |
| H | -1.64819 | -2.09073 | -1.80721 | O                | 0.720057 | -0.7667  | -1.59302 |
| H | 1.118988 | -2.96946 | 0.100598 | H                | -1.63488 | -0.40943 | 2.249973 |
| H | 0.936615 | -0.84815 | 1.379378 | H                | -2.91148 | 2.73975  | 2.182531 |
| H | 3.423332 | -2.2419  | -0.40443 | H                | -1.45308 | 1.806361 | 2.508491 |
| H | 5.751817 | -1.40748 | -0.33864 | H                | -3.45968 | -2.19599 | 1.785687 |
| H | 4.820255 | -0.52707 | -1.56267 | H                | -3.57452 | -1.59301 | 0.146601 |
| H | 5.187178 | 0.237013 | -0.00375 | H                | -1.13951 | 3.949312 | 1.234575 |
| H | 4.657025 | -2.28022 | 1.753166 | H                | -2.04517 | 3.301174 | -0.11554 |
| H | 4.005967 | -0.68467 | 2.174399 | H                | -1.07578 | -2.80838 | 1.473609 |
| H | 2.922233 | -2.0807  | 2.036686 | H                | -2.18688 | -3.6664  | 0.428903 |
| H | -3.61083 | 1.203435 | 2.037979 | H                | -0.86486 | -0.23263 | -0.36697 |
| H | -5.11486 | 0.523171 | 1.40202  | H                | 0.629596 | -1.31033 | 1.704362 |
| H | -3.83106 | -0.54885 | 1.944076 | H                | 0.712066 | 2.353233 | 0.916388 |

|                  |          |          |          |                  |          |          |          |
|------------------|----------|----------|----------|------------------|----------|----------|----------|
| H                | 1.706497 | 1.634539 | -2.53357 | H                | -2.32504 | 1.310881 | -1.42779 |
| H                | 2.715069 | -0.29912 | -1.73301 | H                | -5.11026 | -0.65715 | -0.71691 |
| H                | 3.435134 | 0.985859 | 1.08475  | H                | -3.79822 | -0.37318 | -1.85923 |
| H                | 3.949766 | -0.20254 | 3.197266 | H                | -2.69368 | 3.283321 | 0.546366 |
| H                | 2.205164 | 0.087045 | 3.078256 | H                | -1.67034 | 2.169108 | 1.413906 |
| H                | 2.862984 | -1.52843 | 2.75673  | H                | -4.02432 | -2.75228 | -1.2139  |
| H                | 5.34796  | -0.60184 | 1.150884 | H                | -3.72672 | -2.37212 | 0.476811 |
| H                | 4.298497 | -1.90864 | 0.56864  | H                | -0.89713 | 3.21184  | -1.35908 |
| H                | 4.650785 | -0.51551 | -0.47213 | H                | -0.68576 | 4.211973 | 0.066939 |
| H                | -4.41798 | 0.243584 | -0.21453 | H                | 0.738519 | 1.485544 | -1.84026 |
| H                | -4.68527 | 1.794589 | 0.59098  | H                | 3.265784 | 1.333545 | -1.01305 |
| H                | -3.56001 | 1.689782 | -0.75479 | H                | -1.7263  | -1.93538 | -1.84507 |
| H                | -1.06695 | -2.16279 | -2.78111 | H                | 1.064247 | -2.97942 | -0.02841 |
| H                | -2.2383  | -3.27295 | -2.03893 | H                | 0.863663 | -0.87987 | 1.325295 |
| H                | -2.4556  | -1.51353 | -1.89628 | H                | 3.383942 | -2.30642 | -0.3733  |
| H                | 0.779562 | -3.09677 | -1.29989 | H                | 5.721906 | -1.51745 | -0.22137 |
| H                | -1.74139 | 2.454255 | -1.979   | H                | 4.851139 | -0.60952 | -1.47048 |
| H                | -0.35685 | 2.745027 | -3.04217 | H                | 5.178098 | 0.135963 | 0.105662 |
| H                | -0.85329 | 1.09412  | -2.68766 | H                | 4.539258 | -2.37575 | 1.826929 |
| H                | 2.470941 | 3.173669 | -0.88024 | H                | 3.897829 | -0.77212 | 2.232966 |
| 05_3R4S13S14R_12 |          |          |          | H                | 2.798655 | -2.15052 | 2.048229 |
| C                | -3.44656 | 0.441338 | 0.097655 | H                | -3.49668 | 1.194867 | 2.144348 |
| C                | -2.58441 | 1.357925 | -0.3693  | H                | -5.01373 | 0.477626 | 1.583194 |
| C                | -4.01436 | -0.63036 | -0.81432 | H                | -3.65976 | -0.56071 | 2.010378 |
| C                | -1.94139 | 2.492428 | 0.402795 | H                | 2.123733 | 2.355058 | 1.583994 |
| C                | -3.47943 | -2.06929 | -0.54593 | H                | 0.809158 | 3.488736 | 1.954066 |
| C                | -0.7236  | 3.169467 | -0.27198 | H                | 0.496411 | 1.739474 | 1.93217  |
| C                | 0.714644 | 2.636852 | -0.03367 | H                | 1.337791 | 3.814053 | -1.48392 |
| C                | 1.004862 | 1.307213 | -0.78297 | H                | -2.18862 | -3.06297 | 1.731633 |
| C                | 2.405919 | 0.772016 | -0.66959 | H                | -0.47543 | -3.48656 | 1.81589  |
| C                | 2.413673 | -0.44945 | -0.12643 | H                | -0.99255 | -1.83996 | 2.168853 |
| C                | -2.00337 | -2.15242 | -0.81419 | H                | 0.305915 | -1.22477 | -2.06575 |
| C                | -1.00325 | -2.35508 | 0.052987 | 05_3R4S13S14R_13 |          |          |          |
| C                | 0.445571 | -2.1457  | -0.38698 | C                | -3.4592  | 0.112256 | -0.3643  |
| C                | 0.98895  | -0.83044 | 0.233251 | C                | -2.72315 | 1.066728 | -0.96011 |
| C                | 3.586694 | -1.35851 | 0.149179 | C                | -3.73102 | -1.21187 | -1.05374 |
| C                | 4.909751 | -0.80275 | -0.39394 | C                | -2.41517 | 2.454508 | -0.43244 |
| C                | 3.707642 | -1.68355 | 1.653631 | C                | -3.07188 | -2.46006 | -0.39838 |
| C                | -3.91869 | 0.393713 | 1.532399 | C                | -1.31699 | 2.597629 | 0.654675 |
| C                | 1.054988 | 2.547127 | 1.45186  | C                | 0.160359 | 2.55267  | 0.211553 |
| O                | 1.627659 | 3.615377 | -0.57757 | C                | 0.55051  | 1.156924 | -0.34147 |
| C                | -1.18094 | -2.70095 | 1.51304  | C                | 1.999744 | 0.930365 | -0.69551 |
| O                | 0.624525 | -2.10383 | -1.7954  | C                | 2.462727 | -0.18878 | -0.12558 |
| O                | 0.183861 | 0.239281 | -0.29131 | C                | -1.57534 | -2.4329  | -0.54113 |



|   |          |          |          |                  |          |                   |
|---|----------|----------|----------|------------------|----------|-------------------|
| C | -0.63684 | -2.40466 | 0.413878 | 05_3R4S13S14R_14 |          |                   |
| C | 0.827049 | -2.18078 | 0.041358 | C                | -3.47373 | 0.115156 -0.35293 |
| C | 1.328988 | -0.82719 | 0.660415 | C                | -2.71691 | 1.058797 -0.93946 |
| C | 3.830645 | -0.81828 | -0.2278  | C                | -3.74278 | -1.21049 -1.04108 |
| C | 4.726186 | -0.13257 | -1.26799 | C                | -2.40378 | 2.446719 -0.41592 |
| C | 4.528281 | -0.86185 | 1.149025 | C                | -3.07729 | -2.45639 -0.38768 |
| C | -4.08355 | 0.273885 | 1.001823 | C                | -1.30087 | 2.587998 0.665538 |
| C | 1.056866 | 2.959019 | 1.386991 | C                | 0.177634 | 2.549536 0.205195 |
| O | 0.293104 | 3.498417 | -0.86554 | C                | 0.566092 | 1.163786 -0.36037 |
| C | -0.90116 | -2.51456 | 1.896275 | C                | 2.017517 | 0.93747 -0.69651  |
| O | 1.080272 | -2.25392 | -1.35918 | C                | 2.467761 | -0.18817 -0.12978 |
| O | 0.289008 | 0.157779 | 0.651338 | C                | -1.58183 | -2.4278 -0.54143  |
| H | -2.32123 | 0.836857 | -1.94782 | C                | -0.63634 | -2.40735 0.406554 |
| H | -4.81793 | -1.38392 | -1.07696 | C                | 0.824663 | -2.17875 0.025469 |
| H | -3.40147 | -1.15547 | -2.09914 | C                | 1.323812 | -0.82507 0.64257  |
| H | -2.15312 | 3.105686 | -1.2732  | C                | 3.834463 | -0.82277 -0.21942 |
| H | -3.33029 | 2.87927  | 0.001253 | C                | 4.746336 | -0.12852 -1.23964 |
| H | -3.47657 | -3.34639 | -0.90938 | C                | 4.513927 | -0.88508 1.165609 |
| H | -3.38304 | -2.53793 | 0.64839  | C                | -4.12654 | 0.290051 0.998053 |
| H | -1.4624  | 3.574909 | 1.133064 | C                | 1.087281 | 2.950392 1.373089 |
| H | -1.46055 | 1.837878 | 1.429472 | O                | 0.390082 | 3.43287 -0.91173  |
| H | -0.08961 | 0.988346 | -1.22225 | C                | -0.88987 | -2.52567 1.89021  |
| H | 2.551257 | 1.574898 | -1.37147 | O                | 1.069634 | -2.24871 -1.37663 |
| H | -1.23093 | -2.37052 | -1.57275 | O                | 0.282197 | 0.159048 0.617705 |
| H | 1.443788 | -2.98184 | 0.471554 | H                | -2.29708 | 0.818155 -1.91689 |
| H | 1.589482 | -1.01529 | 1.710176 | H                | -4.82907 | -1.38606 -1.0624  |
| H | 3.676    | -1.85747 | -0.55218 | H                | -3.4153  | -1.1535 -2.08707  |
| H | 5.687255 | -0.65268 | -1.34483 | H                | -2.13313 | 3.0895 -1.26146   |
| H | 4.259822 | -0.13332 | -2.25913 | H                | -3.31673 | 2.880334 0.012807 |
| H | 4.93259  | 0.908217 | -0.98945 | H                | -3.48506 | -3.34415 -0.89392 |
| H | 5.4959   | -1.37    | 1.068584 | H                | -3.38071 | -2.5324 0.661573  |
| H | 4.707298 | 0.15223  | 1.525888 | H                | -1.449   | 3.562897 1.15369  |
| H | 3.931704 | -1.39799 | 1.895024 | H                | -1.43929 | 1.829632 1.443115 |
| H | -4.02072 | 1.299329 | 1.375642 | H                | -0.06212 | 1.008691 -1.25249 |
| H | -5.14276 | -0.01734 | 0.984915 | H                | 2.571056 | 1.602096 -1.34892 |
| H | -3.59294 | -0.37358 | 1.741126 | H                | -1.24399 | -2.35703 -1.5747  |
| H | 2.111615 | 2.988046 | 1.08747  | H                | 1.446269 | -2.97802 0.452354 |
| H | 0.774112 | 3.951731 | 1.752051 | H                | 1.572054 | -1.00968 1.696056 |
| H | 0.965461 | 2.242945 | 2.209272 | H                | 3.680504 | -1.8578 -0.55785  |
| H | 1.239425 | 3.676481 | -0.9858  | H                | 5.706338 | -0.65164 -1.31042 |
| H | -1.91758 | -2.85301 | 2.111599 | H                | 4.292534 | -0.11506 -2.23646 |
| H | -0.20989 | -3.22913 | 2.364012 | H                | 4.952389 | 0.908121 -0.94617 |
| H | -0.75548 | -1.55057 | 2.399805 | H                | 5.48139  | -1.39472 1.09202  |
| H | 0.759386 | -1.43143 | -1.76327 | H                | 4.690369 | 0.123966 1.556962 |

|                  |          |          |          |                  |          |          |          |
|------------------|----------|----------|----------|------------------|----------|----------|----------|
| H                | 3.906367 | -1.42866 | 1.897322 | H                | -2.16727 | -3.68007 | 0.493757 |
| H                | -3.68407 | -0.38504 | 1.742892 | H                | -0.85165 | -0.34472 | -0.31483 |
| H                | -4.03109 | 1.308052 | 1.384821 | H                | 0.732528 | -1.34311 | 1.715805 |
| H                | -5.19618 | 0.043268 | 0.949971 | H                | 0.648375 | 2.423396 | 0.897282 |
| H                | 2.132914 | 2.987644 | 1.053505 | H                | 1.641066 | 1.663959 | -2.5412  |
| H                | 0.807363 | 3.939797 | 1.755389 | H                | 2.706678 | -0.23724 | -1.74526 |
| H                | 1.000736 | 2.233587 | 2.195775 | H                | 3.382315 | 1.112899 | 1.093817 |
| H                | 0.199291 | 4.335311 | -0.60795 | H                | 4.020684 | -0.09519 | 3.160344 |
| H                | -1.90308 | -2.87029 | 2.110977 | H                | 2.258386 | 0.074901 | 3.08209  |
| H                | -0.19162 | -3.23839 | 2.350242 | H                | 3.019223 | -1.48107 | 2.700827 |
| H                | -0.74622 | -1.56312 | 2.397401 | H                | 5.40061  | -0.34199 | 1.083071 |
| H                | 0.771643 | -1.41415 | -1.77337 | H                | 4.43169  | -1.69638 | 0.46896  |
| 05_3R4S13S14R_15 |          |          |          | H                | 4.670816 | -0.24641 | -0.52526 |
| C                | -2.87299 | 0.885096 | 1.078895 | H                | -4.44999 | 0.22555  | -0.27909 |
| C                | -2.44331 | -0.34019 | 1.425741 | H                | -4.81576 | 1.696539 | 0.63082  |
| C                | -2.22632 | 2.122341 | 1.67815  | H                | -3.70433 | 1.763206 | -0.72854 |
| C                | -2.88346 | -1.68971 | 0.906454 | H                | -0.80096 | -2.42699 | -2.72357 |
| C                | -1.45654 | 3.028513 | 0.669916 | H                | -2.03358 | -3.48407 | -1.99434 |
| C                | -1.72355 | -2.68534 | 0.643447 | H                | -2.26051 | -1.72676 | -1.99804 |
| C                | -0.76832 | -2.44784 | -0.56081 | H                | -0.18767 | -4.31386 | -0.66999 |
| C                | -0.05985 | -1.09325 | -0.4148  | H                | -1.8421  | 2.307559 | -1.96305 |
| C                | 0.921037 | -0.96043 | 0.720713 | H                | -0.49087 | 2.674248 | -3.04741 |
| C                | 2.013561 | -0.30158 | 0.326715 | H                | -0.87472 | 0.998874 | -2.66509 |
| C                | -0.15254 | 2.463427 | 0.158905 | H                | 2.368585 | 3.23593  | -0.91039 |
| C                | 0.138395 | 2.03614  | -1.08186 | 05_3R4S13S14R_16 |          |          |          |
| C                | 1.543538 | 1.555207 | -1.4484  | C                | -3.49368 | 0.12054  | -0.31892 |
| C                | 1.833142 | 0.047349 | -1.14472 | C                | -2.76522 | 1.088964 | -0.9003  |
| C                | 3.251271 | 0.024969 | 1.13152  | C                | -3.75424 | -1.19297 | -1.03183 |
| C                | 3.125596 | -0.3935  | 2.602856 | C                | -2.4605  | 2.4637   | -0.34105 |
| C                | 4.511072 | -0.60276 | 0.497623 | C                | -3.03587 | -2.43139 | -0.42783 |
| C                | -4.0137  | 1.143175 | 0.122042 | C                | -1.32043 | 2.593889 | 0.703944 |
| C                | -1.51334 | -2.52193 | -1.9005  | C                | 0.149357 | 2.566133 | 0.215198 |
| O                | 0.252107 | -3.46024 | -0.52392 | C                | 0.554249 | 1.182965 | -0.35768 |
| C                | -0.82969 | 2.008524 | -2.24101 | C                | 2.012483 | 0.984674 | -0.67478 |
| O                | 2.586053 | 2.295283 | -0.80943 | C                | 2.467182 | -0.14699 | -0.12873 |
| O                | 0.726904 | -0.75495 | -1.57795 | C                | -1.5427  | -2.31968 | -0.56923 |
| H                | -1.64529 | -0.38913 | 2.169241 | C                | -0.58656 | -2.46866 | 0.357495 |
| H                | -3.00457 | 2.747755 | 2.141247 | C                | 0.864665 | -2.16937 | -0.00347 |
| H                | -1.54082 | 1.827465 | 2.482382 | C                | 1.319067 | -0.80974 | 0.616257 |
| H                | -3.53136 | -2.16661 | 1.658251 | C                | 3.841707 | -0.76449 | -0.21302 |
| H                | -3.49894 | -1.58842 | 0.006582 | C                | 4.7584   | -0.03723 | -1.20562 |
| H                | -1.23546 | 3.968724 | 1.195393 | C                | 4.506146 | -0.85202 | 1.177926 |
| H                | -2.12129 | 3.297871 | -0.15688 | C                | -4.11148 | 0.24759  | 1.053519 |
| H                | -1.10842 | -2.76677 | 1.548181 | C                | 1.065175 | 2.978888 | 1.368703 |

|                  |          |          |          |   |          |          |          |
|------------------|----------|----------|----------|---|----------|----------|----------|
| O                | 0.369079 | 3.543886 | -0.8184  | C | 0.088172 | 1.135122 | 0.037697 |
| C                | -0.81717 | -2.84997 | 1.798323 | C | -1.18683 | 1.075779 | 0.835175 |
| O                | 1.098469 | -2.11319 | -1.40862 | C | -2.10741 | 0.32737  | 0.217667 |
| O                | 0.267831 | 0.158035 | 0.597946 | C | 0.952609 | -2.50731 | -0.63147 |
| H                | -2.36518 | 0.879648 | -1.89309 | C | -0.3238  | -2.32192 | -0.25589 |
| H                | -4.8356  | -1.39608 | -1.02713 | C | -1.27351 | -1.68982 | -1.26461 |
| H                | -3.45704 | -1.10286 | -2.08451 | C | -1.51629 | -0.16096 | -1.09525 |
| H                | -2.26472 | 3.153491 | -1.1736  | C | -3.51508 | 0.00577  | 0.665858 |
| H                | -3.36243 | 2.860005 | 0.142647 | C | -3.8214  | 0.529548 | 2.075226 |
| H                | -3.39884 | -3.3154  | -0.97457 | C | -4.55538 | 0.528731 | -0.34828 |
| H                | -3.33885 | -2.56987 | 0.615314 | C | 3.276985 | -0.54095 | 1.907178 |
| H                | -1.45626 | 3.561339 | 1.204547 | C | -0.29636 | 3.450013 | -0.96248 |
| H                | -1.44129 | 1.818205 | 1.467162 | O | 1.004479 | 3.112594 | 1.072516 |
| H                | -0.0561  | 1.017511 | -1.26408 | C | -0.88672 | -2.69735 | 1.094356 |
| H                | 2.567024 | 1.670895 | -1.30366 | O | -2.57293 | -2.29399 | -1.28173 |
| H                | -1.21611 | -2.01484 | -1.5631  | O | -0.26137 | 0.517566 | -1.2149  |
| H                | 1.511446 | -2.94576 | 0.442295 | H | 3.295652 | -0.02669 | -1.54481 |
| H                | 1.558275 | -1.0075  | 1.670422 | H | 3.652438 | -2.20526 | -1.12069 |
| H                | 3.704932 | -1.79344 | -0.57758 | H | 4.227844 | -2.68116 | 0.474611 |
| H                | 5.725887 | -0.54677 | -1.27618 | H | 3.181265 | 2.007665 | 0.792724 |
| H                | 4.315753 | -0.00622 | -2.20694 | H | 4.123988 | 2.182762 | -0.67318 |
| H                | 4.947945 | 0.99487  | -0.88612 | H | 1.883088 | -3.08069 | 1.234952 |
| H                | 5.480371 | -1.34911 | 1.105134 | H | 2.350021 | -4.05568 | -0.14698 |
| H                | 4.666386 | 0.149616 | 1.594511 | H | 2.326078 | 3.505939 | -1.17635 |
| H                | 3.895921 | -1.41863 | 1.889835 | H | 1.833203 | 2.005515 | -1.95697 |
| H                | -4.0324  | 1.258245 | 1.462503 | H | 0.868892 | 0.542377 | 0.530668 |
| H                | -5.17488 | -0.02756 | 1.030264 | H | -1.29387 | 1.53802  | 1.810287 |
| H                | -3.62845 | -0.4317  | 1.768902 | H | 1.211356 | -2.22359 | -1.65339 |
| H                | 2.106238 | 3.030492 | 1.037367 | H | -0.81184 | -1.78339 | -2.25856 |
| H                | 0.773906 | 3.963456 | 1.748936 | H | -2.14765 | 0.130257 | -1.94735 |
| H                | 0.995717 | 2.252873 | 2.184114 | H | -3.60915 | -1.08779 | 0.676177 |
| H                | -0.16568 | 3.287065 | -1.58749 | H | -4.83244 | 0.235977 | 2.378831 |
| H                | -1.8485  | -3.15579 | 1.989089 | H | -3.11827 | 0.132027 | 2.815938 |
| H                | -0.16278 | -3.68068 | 2.095714 | H | -3.76734 | 1.624687 | 2.112562 |
| H                | -0.58962 | -2.01176 | 2.470758 | H | -5.56858 | 0.277977 | -0.01354 |
| H                | 0.758401 | -2.94269 | -1.7823  | H | -4.49182 | 1.619307 | -0.44856 |
| 05_3R4S13S14R_17 |          |          |          | H | -4.41092 | 0.083043 | -1.33711 |
| C                | 3.308056 | -0.73748 | 0.409764 | H | 3.164246 | 0.505568 | 2.199214 |
| C                | 3.26274  | 0.258957 | -0.49084 | H | 2.449598 | -1.10163 | 2.362458 |
| C                | 3.402118 | -2.18056 | -0.05251 | H | 4.199401 | -0.92255 | 2.367522 |
| C                | 3.196292 | 1.749399 | -0.26939 | H | -1.24328 | 3.537256 | -0.41545 |
| C                | 2.118684 | -3.0258  | 0.167212 | H | 0.129104 | 4.452095 | -1.08096 |
| C                | 2.022239 | 2.469878 | -0.98176 | H | -0.52242 | 3.042674 | -1.952   |
| C                | 0.686411 | 2.543992 | -0.21408 | H | 0.170895 | 3.394511 | 1.481389 |

|                  |          |          |          |                  |          |          |          |
|------------------|----------|----------|----------|------------------|----------|----------|----------|
| H                | -1.75907 | -3.35111 | 0.978386 | H                | -3.16383 | 0.149584 | 2.80507  |
| H                | -0.15501 | -3.22021 | 1.714717 | H                | -3.82091 | 1.620686 | 2.066173 |
| H                | -1.23013 | -1.81353 | 1.644107 | H                | -5.57806 | 0.213996 | -0.0577  |
| H                | -2.45583 | -3.22817 | -1.51719 | H                | -4.51077 | 1.558787 | -0.50506 |
| 05_3R4S13S14R_18 |          |          |          | H                | -4.40104 | 0.006286 | -1.36207 |
| C                | 3.32554  | -0.70731 | 0.391772 | H                | 3.221708 | 0.537628 | 2.183489 |
| C                | 3.247842 | 0.286163 | -0.50982 | H                | 2.499756 | -1.06475 | 2.360003 |
| C                | 3.431719 | -2.14997 | -0.06901 | H                | 4.250473 | -0.89661 | 2.332527 |
| C                | 3.162958 | 1.775793 | -0.28851 | H                | -1.2886  | 3.522878 | -0.37465 |
| C                | 2.161335 | -3.00981 | 0.169641 | H                | 0.055904 | 4.449183 | -1.07655 |
| C                | 1.976614 | 2.480831 | -0.99357 | H                | -0.58746 | 3.033876 | -1.93114 |
| C                | 0.64579  | 2.546912 | -0.20487 | H                | 1.233625 | 3.961107 | 1.022521 |
| C                | 0.065582 | 1.137784 | 0.059253 | H                | -0.10044 | -3.1978  | 1.743543 |
| C                | -1.21731 | 1.077105 | 0.840447 | H                | -1.18572 | -1.79889 | 1.661208 |
| C                | -2.11957 | 0.309484 | 0.22015  | H                | -1.70904 | -3.34911 | 1.020566 |
| C                | 0.983326 | -2.50987 | -0.62283 | H                | -2.41706 | -3.26089 | -1.48827 |
| C                | -0.29034 | -2.3268  | -0.23749 | 05_3R4S13S14R_19 |          |          |          |
| C                | -1.25023 | -1.7097  | -1.24513 | C                | -3.53171 | 0.096397 | 0.331044 |
| C                | -1.50776 | -0.18274 | -1.08209 | C                | -2.60484 | 0.87518  | 0.913821 |
| C                | -3.53028 | -0.02111 | 0.652977 | C                | -3.61414 | -1.37873 | 0.684322 |
| C                | -3.86213 | 0.524617 | 2.048301 | C                | -2.38628 | 2.357881 | 0.73448  |
| C                | -4.56327 | 0.4697   | -0.38413 | C                | -3.07471 | -2.35955 | -0.39878 |
| C                | 3.322075 | -0.50946 | 1.889227 | C                | -1.3294  | 2.833985 | -0.29742 |
| C                | -0.35659 | 3.441183 | -0.94229 | C                | 0.194822 | 2.642314 | -0.05468 |
| O                | 0.879049 | 3.062264 | 1.121283 | C                | 0.719307 | 1.280141 | -0.57749 |
| C                | -0.84025 | -2.6881  | 1.121679 | C                | 2.209715 | 1.065773 | -0.55275 |
| O                | -2.54344 | -2.32752 | -1.25447 | C                | 2.501405 | -0.14017 | -0.05712 |
| O                | -0.25629 | 0.505957 | -1.19157 | C                | -1.63086 | -2.09289 | -0.73502 |
| H                | 3.265525 | -0.00059 | -1.56372 | C                | -0.5403  | -2.59788 | -0.13797 |
| H                | 3.667445 | -2.17426 | -1.14054 | C                | 0.836853 | -2.06536 | -0.517   |
| H                | 4.27077  | -2.63872 | 0.447981 | C                | 1.199439 | -0.82028 | 0.338321 |
| H                | 3.138476 | 2.030746 | 0.774889 | C                | 3.846251 | -0.81053 | 0.088813 |
| H                | 4.085727 | 2.22253  | -0.68904 | C                | 4.983303 | -0.00347 | -0.55225 |
| H                | 1.935881 | -3.05929 | 1.239849 | C                | 4.166478 | -1.12326 | 1.56647  |
| H                | 2.402377 | -4.03902 | -0.13936 | C                | -4.53828 | 0.576594 | -0.68837 |
| H                | 2.271247 | 3.519302 | -1.20313 | C                | 0.607465 | 2.908083 | 1.388747 |
| H                | 1.7832   | 2.015731 | -1.9678  | O                | 0.876759 | 3.646708 | -0.84346 |
| H                | 0.847554 | 0.559876 | 0.56893  | C                | -0.54959 | -3.61589 | 0.975092 |
| H                | -1.33455 | 1.575692 | 1.794661 | O                | 0.940413 | -1.67902 | -1.88545 |
| H                | 1.230507 | -2.236   | -1.6503  | O                | 0.205009 | 0.195008 | 0.195709 |
| H                | -0.79122 | -1.8049  | -2.24027 | H                | -1.92283 | 0.391149 | 1.608472 |
| H                | -2.13122 | 0.100431 | -1.94272 | H                | -4.66218 | -1.64778 | 0.886996 |
| H                | -3.61151 | -1.11545 | 0.682904 | H                | -3.05453 | -1.56019 | 1.609343 |
| H                | -4.87366 | 0.224125 | 2.343851 | H                | -3.32765 | 2.835412 | 0.43633  |

|                  |          |          |          |                  |          |          |          |
|------------------|----------|----------|----------|------------------|----------|----------|----------|
| H                | -2.13452 | 2.792317 | 1.711084 | C                | 4.975551 | 0.031522 | -0.61085 |
| H                | -3.68496 | -2.27162 | -1.30697 | C                | 4.204581 | -1.07559 | 1.531761 |
| H                | -3.2205  | -3.38112 | -0.028   | C                | -4.54896 | 0.52651  | -0.7477  |
| H                | -1.57765 | 2.40888  | -1.28107 | C                | 0.507285 | 2.847291 | 1.441412 |
| H                | -1.45781 | 3.920637 | -0.3868  | O                | 0.795488 | 3.657671 | -0.83785 |
| H                | 0.35623  | 1.190212 | -1.61908 | C                | -0.5236  | -3.61029 | 1.0197   |
| H                | 2.905534 | 1.790091 | -0.95726 | O                | 0.969287 | -1.70193 | -1.8562  |
| H                | -1.46197 | -1.33094 | -1.49212 | O                | 0.208692 | 0.191123 | 0.211847 |
| H                | 1.589396 | -2.84143 | -0.28956 | H                | -1.95059 | 0.431179 | 1.573862 |
| H                | 1.200989 | -1.1443  | 1.389285 | H                | -3.04968 | -1.53473 | 1.608321 |
| H                | 3.785841 | -1.77488 | -0.44017 | H                | -4.65217 | -1.66081 | 0.87992  |
| H                | 5.930991 | -0.54722 | -0.47028 | H                | -3.37026 | 2.826476 | 0.307167 |
| H                | 4.789989 | 0.185397 | -1.61362 | H                | -2.23455 | 2.83503  | 1.633376 |
| H                | 5.109491 | 0.965023 | -0.05319 | H                | -3.65156 | -2.31708 | -1.29607 |
| H                | 5.125405 | -1.64806 | 1.646015 | H                | -3.18856 | -3.3953  | 0.00997  |
| H                | 4.235717 | -0.19817 | 2.151139 | H                | -1.55569 | 2.412939 | -1.33047 |
| H                | 3.401143 | -1.75675 | 2.027895 | H                | -1.46199 | 3.925611 | -0.44442 |
| H                | -4.4604  | 1.647322 | -0.89436 | H                | 0.318212 | 1.193807 | -1.60936 |
| H                | -4.41454 | 0.050249 | -1.64508 | H                | 2.886072 | 1.769935 | -1.03242 |
| H                | -5.56486 | 0.369694 | -0.35411 | H                | -1.43611 | -1.35127 | -1.47252 |
| H                | 1.698775 | 2.928801 | 1.469518 | H                | 1.616629 | -2.83868 | -0.24146 |
| H                | 0.218733 | 3.873998 | 1.728634 | H                | 1.233454 | -1.12198 | 1.409813 |
| H                | 0.228643 | 2.122726 | 2.047684 | H                | 3.793227 | -1.74751 | -0.46258 |
| H                | 0.557799 | 3.561704 | -1.75804 | H                | 5.928569 | -0.50414 | -0.53965 |
| H                | -1.55683 | -3.9633  | 1.217893 | H                | 4.763741 | 0.208424 | -1.67073 |
| H                | 0.058892 | -4.4929  | 0.714454 | H                | 5.103395 | 1.0054   | -0.12248 |
| H                | -0.11568 | -3.20112 | 1.896193 | H                | 5.169698 | -1.59045 | 1.598894 |
| H                | 0.456281 | -2.34551 | -2.39919 | H                | 4.274935 | -0.14507 | 2.107699 |
| 05_3R4S13S14R_20 |          |          |          | H                | 3.453343 | -1.71234 | 2.011273 |
| C                | -3.54333 | 0.085785 | 0.290269 | H                | -4.48447 | 1.592555 | -0.98033 |
| C                | -2.63422 | 0.891632 | 0.864473 | H                | -4.41071 | -0.02177 | -1.68989 |
| C                | -3.60675 | -1.38215 | 0.676527 | H                | -5.57498 | 0.313454 | -0.41547 |
| C                | -2.43492 | 2.373245 | 0.657045 | H                | 1.594148 | 2.815299 | 1.588382 |
| C                | -3.04882 | -2.38043 | -0.38079 | H                | 0.144339 | 3.823422 | 1.780754 |
| C                | -1.34461 | 2.839673 | -0.34148 | H                | 0.067622 | 2.068259 | 2.069683 |
| C                | 0.162107 | 2.634003 | -0.03331 | H                | 1.734088 | 3.67819  | -0.59072 |
| C                | 0.69593  | 1.279854 | -0.57669 | H                | -1.52992 | -3.96089 | 1.261709 |
| C                | 2.190385 | 1.073877 | -0.57714 | H                | 0.090757 | -4.48649 | 0.770396 |
| C                | 2.503257 | -0.12142 | -0.06791 | H                | -0.09591 | -3.18406 | 1.938548 |
| C                | -1.60466 | -2.10787 | -0.70988 | H                | 0.482441 | -2.37216 | -2.36243 |
| C                | -0.51481 | -2.60296 | -0.10307 | 05_3R4S13S14R_21 |          |          |          |
| C                | 0.861455 | -2.06947 | -0.4833  | C                | -3.53581 | 0.09885  | 0.310628 |
| C                | 1.215225 | -0.80969 | 0.355361 | C                | -2.61306 | 0.884164 | 0.891181 |
| C                | 3.856356 | -0.77856 | 0.05704  | C                | -3.61808 | -1.37299 | 0.677365 |

|   |          |          |          |                  |          |          |          |
|---|----------|----------|----------|------------------|----------|----------|----------|
| C | -2.39767 | 2.366068 | 0.702891 | H                | 1.674142 | 2.834166 | 1.51669  |
| C | -3.07201 | -2.36304 | -0.39366 | H                | 0.233148 | 3.845102 | 1.755449 |
| C | -1.32432 | 2.837745 | -0.31402 | H                | 0.154885 | 2.099225 | 2.063075 |
| C | 0.195616 | 2.632462 | -0.04985 | H                | 0.622989 | 4.458419 | -0.63765 |
| C | 0.713618 | 1.275637 | -0.58896 | H                | -1.56148 | -3.94908 | 1.247127 |
| C | 2.204445 | 1.061339 | -0.57594 | H                | 0.057178 | -4.48252 | 0.757333 |
| C | 2.500917 | -0.13779 | -0.06683 | H                | -0.1242  | -3.17861 | 1.924568 |
| C | -1.62678 | -2.09775 | -0.72484 | H                | 0.459614 | -2.36898 | -2.37708 |
| C | -0.53903 | -2.59678 | -0.11768 | 05_3R4S13S14R_22 |          |          |          |
| C | 0.83979  | -2.06974 | -0.49779 | C                | -3.45706 | 0.35023  | 0.074138 |
| C | 1.202622 | -0.81512 | 0.344137 | C                | -2.70992 | 1.330353 | -0.45573 |
| C | 3.847389 | -0.80562 | 0.075906 | C                | -3.99148 | -0.76565 | -0.80399 |
| C | 4.979347 | -0.00348 | -0.58015 | C                | -2.10776 | 2.529292 | 0.242146 |
| C | 4.177719 | -1.10369 | 1.554397 | C                | -3.35463 | -2.1578  | -0.53293 |
| C | -4.53777 | 0.567647 | -0.71849 | C                | -0.8845  | 3.161813 | -0.46539 |
| C | 0.585252 | 2.864236 | 1.410902 | C                | 0.554453 | 2.692713 | -0.13073 |
| O | 0.900583 | 3.56586  | -0.89993 | C                | 0.887167 | 1.269468 | -0.66095 |
| C | -0.5533  | -3.60334 | 1.005716 | C                | 2.321725 | 0.842859 | -0.49889 |
| O | 0.948027 | -1.7004  | -1.8702  | C                | 2.398731 | -0.3362  | 0.122889 |
| O | 0.205986 | 0.196769 | 0.196807 | C                | -1.86268 | -2.10464 | -0.70612 |
| H | -1.93305 | 0.406727 | 1.592425 | C                | -0.89897 | -2.44279 | 0.162033 |
| H | -4.66685 | -1.64127 | 0.877403 | C                | 0.55662  | -2.1362  | -0.17309 |
| H | -3.06288 | -1.54498 | 1.606867 | C                | 0.994738 | -0.79299 | 0.466014 |
| H | -3.33582 | 2.836793 | 0.384398 | C                | 3.625415 | -1.14935 | 0.478037 |
| H | -2.16646 | 2.80847  | 1.681338 | C                | 4.169343 | -1.91125 | -0.74888 |
| H | -3.67748 | -2.2842  | -1.30586 | C                | 4.725675 | -0.28543 | 1.118611 |
| H | -3.21855 | -3.38137 | -0.01429 | C                | -3.81945 | 0.260651 | 1.537029 |
| H | -1.55515 | 2.427883 | -1.30563 | C                | 0.874997 | 2.832177 | 1.354875 |
| H | -1.46065 | 3.926185 | -0.4001  | O                | 1.454996 | 3.600847 | -0.80497 |
| H | 0.340363 | 1.191897 | -1.62361 | C                | -1.11639 | -3.06339 | 1.520131 |
| H | 2.895662 | 1.779073 | -0.99902 | O                | 0.816524 | -2.0485  | -1.57111 |
| H | -1.4548  | -1.34275 | -1.48827 | O                | 0.140835 | 0.270884 | 0.040789 |
| H | 1.590716 | -2.84395 | -0.25842 | H                | -2.53078 | 1.29449  | -1.5321  |
| H | 1.209751 | -1.12951 | 1.39815  | H                | -5.08003 | -0.86055 | -0.67246 |
| H | 3.784582 | -1.77497 | -0.44349 | H                | -3.82307 | -0.50879 | -1.85752 |
| H | 5.928255 | -0.54529 | -0.49894 | H                | -2.87591 | 3.316839 | 0.293677 |
| H | 4.778955 | 0.175088 | -1.64192 | H                | -1.85973 | 2.297972 | 1.28296  |
| H | 5.107458 | 0.969946 | -0.09118 | H                | -3.79801 | -2.86892 | -1.24637 |
| H | 5.13793  | -1.62632 | 1.633132 | H                | -3.63437 | -2.50981 | 0.465282 |
| H | 4.249248 | -0.17285 | 2.129702 | H                | -1.02356 | 3.075481 | -1.55482 |
| H | 3.416204 | -1.73365 | 2.026873 | H                | -0.88051 | 4.236871 | -0.24822 |
| H | -4.4596  | 1.636085 | -0.93577 | H                | 0.596837 | 1.251959 | -1.72844 |
| H | -4.40837 | 0.031409 | -1.66887 | H                | 3.146595 | 1.440812 | -0.86806 |
| H | -5.56587 | 0.363204 | -0.38733 | H                | -1.53768 | -1.65306 | -1.64272 |

|                  |          |          |          |                  |          |          |          |
|------------------|----------|----------|----------|------------------|----------|----------|----------|
| H                | 1.193251 | -2.91845 | 0.277601 | H                | -1.63469 | -0.40932 | 2.249578 |
| H                | 0.886593 | -0.91742 | 1.5563   | H                | -2.91162 | 2.739859 | 2.182352 |
| H                | 3.320376 | -1.89969 | 1.222177 | H                | -1.4532  | 1.806509 | 2.508292 |
| H                | 4.988357 | -2.57926 | -0.45579 | H                | -3.45985 | -2.19585 | 1.785471 |
| H                | 3.385036 | -2.50373 | -1.22893 | H                | -3.57437 | -1.59301 | 0.146317 |
| H                | 4.556026 | -1.20582 | -1.49418 | H                | -1.13981 | 3.949405 | 1.234237 |
| H                | 5.582617 | -0.90508 | 1.408189 | H                | -2.04536 | 3.301098 | -0.11586 |
| H                | 5.087014 | 0.475723 | 0.417116 | H                | -1.07583 | -2.80826 | 1.473814 |
| H                | 4.358392 | 0.22988  | 2.012898 | H                | -2.18677 | -3.66645 | 0.429081 |
| H                | -3.42644 | 1.094495 | 2.123673 | H                | -0.86474 | -0.23275 | -0.36698 |
| H                | -4.9112  | 0.247388 | 1.666198 | H                | 0.629781 | -1.31041 | 1.70442  |
| H                | -3.4431  | -0.66819 | 1.986276 | H                | 0.711971 | 2.353638 | 0.916223 |
| H                | 1.942792 | 2.667565 | 1.526793 | H                | 1.706387 | 1.634434 | -2.53363 |
| H                | 0.618776 | 3.837118 | 1.706946 | H                | 2.715189 | -0.29908 | -1.73292 |
| H                | 0.315966 | 2.098914 | 1.941344 | H                | 3.434751 | 0.986251 | 1.085068 |
| H                | 1.203301 | 3.615122 | -1.74388 | H                | 3.949841 | -0.20241 | 3.197322 |
| H                | -2.17039 | -3.25934 | 1.729619 | H                | 2.205136 | 0.086544 | 3.078406 |
| H                | -0.57668 | -4.01689 | 1.604062 | H                | 2.863545 | -1.52861 | 2.756513 |
| H                | -0.73346 | -2.41893 | 2.323582 | H                | 5.348137 | -0.60078 | 1.150847 |
| H                | 0.387965 | -2.81579 | -1.98422 | H                | 4.299149 | -1.90783 | 0.568328 |
| 05_3R4S13S14R_23 |          |          |          | H                | 4.650943 | -0.51436 | -0.47215 |
| C                | -2.80908 | 0.878337 | 1.117419 | H                | -4.41866 | 0.243539 | -0.21396 |
| C                | -2.42041 | -0.35253 | 1.493694 | H                | -4.68552 | 1.794745 | 0.591288 |
| C                | -2.14281 | 2.10919  | 1.710482 | H                | -3.56068 | 1.689524 | -0.7548  |
| C                | -2.88438 | -1.69954 | 0.989103 | H                | -1.06657 | -2.16326 | -2.781   |
| C                | -1.37497 | 3.016836 | 0.701103 | H                | -2.23804 | -3.27325 | -2.03877 |
| C                | -1.74202 | -2.68004 | 0.612421 | H                | -2.45528 | -1.5138  | -1.89643 |
| C                | -0.87349 | -2.3562  | -0.62505 | H                | 0.779917 | -3.09689 | -1.29933 |
| C                | -0.12088 | -1.0286  | -0.43948 | H                | -1.74195 | 2.452466 | -1.97879 |
| C                | 0.851962 | -0.94708 | 0.709556 | H                | -0.35775 | 2.745434 | -3.04181 |
| C                | 1.985921 | -0.35104 | 0.330471 | H                | -0.85239 | 1.093752 | -2.68829 |
| C                | -0.08163 | 2.442576 | 0.174321 | H                | 2.470713 | 3.173728 | -0.88038 |
| C                | 0.207643 | 2.048626 | -1.07813 | 05_3R4S13S14R_24 |          |          |          |
| C                | 1.598786 | 1.524466 | -1.4422  | C                | -3.4593  | 0.114589 | -0.33778 |
| C                | 1.843674 | 0.008036 | -1.14223 | C                | -2.73749 | 1.087901 | -0.92006 |
| C                | 3.228239 | -0.08846 | 1.151085 | C                | -3.73073 | -1.19425 | -1.0555  |
| C                | 3.046475 | -0.45424 | 2.63048  | C                | -2.43641 | 2.464362 | -0.36045 |
| C                | 4.451708 | -0.82162 | 0.559823 | C                | -3.07217 | -2.4556  | -0.42594 |
| C                | -3.92126 | 1.15252  | 0.131495 | C                | -1.29476 | 2.605802 | 0.6825   |
| C                | -1.71341 | -2.32011 | -1.91225 | C                | 0.17454  | 2.557847 | 0.194146 |
| O                | 0.076167 | -3.43111 | -0.71549 | C                | 0.558975 | 1.157413 | -0.34865 |
| C                | -0.74702 | 2.092477 | -2.24808 | C                | 2.008437 | 0.931379 | -0.69264 |
| O                | 2.661029 | 2.225921 | -0.79238 | C                | 2.464131 | -0.19037 | -0.12256 |
| O                | 0.720211 | -0.76685 | -1.59297 | C                | -1.5753  | -2.42484 | -0.56394 |

|   |          |          |          |                  |          |                   |
|---|----------|----------|----------|------------------|----------|-------------------|
| C | -0.64034 | -2.40859 | 0.394657 | 05_3R4S13S14R_25 |          |                   |
| C | 0.824993 | -2.18204 | 0.029845 | C                | -3.47875 | 0.32658 -0.02288  |
| C | 1.322964 | -0.82939 | 0.652518 | C                | -2.70926 | 1.299669 -0.53398 |
| C | 3.833947 | -0.81841 | -0.21024 | C                | -3.95087 | -0.82231 -0.89291 |
| C | 4.7398   | -0.12718 | -1.23788 | C                | -2.15679 | 2.515965 0.176547 |
| C | 4.516239 | -0.86531 | 1.174036 | C                | -3.3092  | -2.19445 -0.5429  |
| C | -4.06933 | 0.239155 | 1.038521 | C                | -0.91525 | 3.162607 -0.479   |
| C | 1.099767 | 2.983355 | 1.334809 | C                | 0.503358 | 2.676383 -0.10394 |
| O | 0.402861 | 3.508402 | -0.86161 | C                | 0.823129 | 1.241341 -0.61749 |
| C | -0.90847 | -2.53456 | 1.874987 | C                | 2.272574 | 0.831758 -0.54417 |
| O | 1.084442 | -2.2541  | -1.36984 | C                | 2.409353 | -0.32666 0.106387 |
| O | 0.282101 | 0.157027 | 0.635958 | C                | -1.81292 | -2.13293 -0.66915 |
| H | -2.34557 | 0.884484 | -1.91766 | C                | -0.87088 | -2.43876 0.234228 |
| H | -4.81778 | -1.36464 | -1.08166 | C                | 0.59162  | -2.14687 -0.08175 |
| H | -3.40153 | -1.11579 | -2.09955 | C                | 1.036926 | -0.79658 0.544315 |
| H | -2.24819 | 3.154628 | -1.19456 | C                | 3.671326 | -1.11631 0.384767 |
| H | -3.33869 | 2.856915 | 0.125556 | C                | 4.252343 | -1.72549 -0.90713 |
| H | -3.47537 | -3.33051 | -0.95719 | C                | 4.724865 | -0.26456 1.116601 |
| H | -3.38629 | -2.55642 | 0.617946 | C                | -3.92138 | 0.273594 1.420311 |
| H | -1.42446 | 3.582775 | 1.165736 | C                | 0.788039 | 2.81973 1.393135  |
| H | -1.42099 | 1.844919 | 1.459626 | O                | 1.349542 | 3.578895 -0.85302 |
| H | -0.0765  | 0.982246 | -1.23658 | C                | -1.12053 | -3.01204 1.607086 |
| H | 2.5598   | 1.598138 | -1.34476 | O                | 0.869621 | -2.08055 -1.47765 |
| H | -1.22601 | -2.34865 | -1.593   | O                | 0.148344 | 0.257871 0.175968 |
| H | 1.439615 | -2.98283 | 0.463775 | H                | -2.46667 | 1.240952 -1.59671 |
| H | 1.573852 | -1.01735 | 1.70446  | H                | -5.04325 | -0.93002 -0.81446 |
| H | 3.684848 | -1.85691 | -0.5399  | H                | -3.73147 | -0.59641 -1.94422 |
| H | 5.702652 | -0.64529 | -1.30611 | H                | -2.93833 | 3.291899 0.185721 |
| H | 4.284239 | -0.12475 | -2.23404 | H                | -1.95527 | 2.296416 1.229959 |
| H | 4.940416 | 0.912977 | -0.95339 | H                | -3.71931 | -2.93908 -1.24202 |
| H | 5.486283 | -1.37026 | 1.102599 | H                | -3.62025 | -2.50984 0.458433 |
| H | 4.6878   | 0.147906 | 1.556479 | H                | -1.00677 | 3.102065 -1.57218 |
| H | 3.913064 | -1.40616 | 1.91135  | H                | -0.91798 | 4.232557 -0.23865 |
| H | -4.01271 | 1.255709 | 1.436703 | H                | 0.463314 | 1.188387 -1.65875 |
| H | -5.12546 | -0.06273 | 1.026452 | H                | 3.069795 | 1.392329 -1.02155 |
| H | -3.56354 | -0.42016 | 1.756518 | H                | -1.46485 | -1.70954 -1.61067 |
| H | 2.139191 | 3.02154  | 0.99601  | H                | 1.21667  | -2.9287 0.385654  |
| H | 0.818404 | 3.976951 | 1.698221 | H                | 0.990458 | -0.92708 1.637763 |
| H | 1.029934 | 2.272912 | 2.163631 | H                | 3.402673 | -1.94928 1.049937 |
| H | -0.17124 | 3.269523 | -1.60771 | H                | 5.112033 | -2.367 -0.67864   |
| H | -1.92473 | -2.87713 | 2.084613 | H                | 3.497935 | -2.31763 -1.43275 |
| H | -0.21682 | -3.25219 | 2.337302 | H                | 4.591148 | -0.93409 -1.58658 |
| H | -0.76593 | -1.57546 | 2.388919 | H                | 5.610871 | -0.86577 1.352567 |
| H | 0.809448 | -1.41254 | -1.76811 | H                | 5.048336 | 0.577995 0.493876 |



|                  |          |          |          |   |          |          |          |
|------------------|----------|----------|----------|---|----------|----------|----------|
| H                | 4.329315 | 0.142681 | 2.053788 | O | 0.312309 | 0.296109 | 0.579876 |
| H                | -3.5967  | 1.143319 | 1.996404 | H | -2.47601 | 0.508679 | -1.90275 |
| H                | -5.01723 | 0.218832 | 1.488263 | H | -4.65475 | -1.97955 | -0.79758 |
| H                | -3.53423 | -0.622   | 1.925122 | H | -3.36992 | -1.5894  | -1.93837 |
| H                | 1.835923 | 2.578423 | 1.610184 | H | -2.54738 | 2.814879 | -1.33191 |
| H                | 0.595841 | 3.848385 | 1.71669  | H | -3.66721 | 2.51709  | -0.02077 |
| H                | 0.16766  | 2.140839 | 1.983501 | H | -2.97719 | -3.69324 | -0.6911  |
| H                | 2.251145 | 3.480691 | -0.50759 | H | -2.94481 | -2.833   | 0.841297 |
| H                | -2.17907 | -3.20567 | 1.795173 | H | -1.88453 | 3.430467 | 1.071611 |
| H                | -0.57926 | -3.95906 | 1.74009  | H | -1.63072 | 1.712132 | 1.372945 |
| H                | -0.76225 | -2.3364  | 2.396133 | H | -0.19261 | 1.017064 | -1.30989 |
| H                | 0.443467 | -2.85211 | -1.88545 | H | 2.350621 | 2.025253 | -1.43375 |
| 05_3R4S13S14R_26 |          |          |          | H | -1.02397 | -2.13143 | -1.47331 |
| C                | -3.48994 | -0.25895 | -0.25581 | H | 1.89796  | -2.64238 | 0.365728 |
| C                | -2.883   | 0.741073 | -0.91793 | H | 1.765781 | -0.70449 | 1.612599 |
| C                | -3.61009 | -1.64181 | -0.86871 | H | 4.441641 | 0.790678 | -0.83707 |
| C                | -2.72001 | 2.176097 | -0.45939 | H | 5.700765 | -0.10023 | 1.094507 |
| C                | -2.71072 | -2.73246 | -0.22383 | H | 4.393167 | 0.95933  | 1.657947 |
| C                | -1.61994 | 2.478998 | 0.592165 | H | 4.229432 | -0.80204 | 1.781202 |
| C                | -0.16496 | 2.635876 | 0.10284  | H | 5.455054 | -1.41386 | -1.06976 |
| C                | 0.414892 | 1.301109 | -0.43674 | H | 4.024702 | -2.21864 | -0.41027 |
| C                | 1.882493 | 1.293285 | -0.78195 | H | 3.91979  | -1.394   | -1.97037 |
| C                | 2.50775  | 0.259214 | -0.21072 | H | -4.1173  | 0.934939 | 1.458243 |
| C                | -1.25421 | -2.4357  | -0.45299 | H | -5.13103 | -0.48277 | 1.132088 |
| C                | -0.24096 | -2.41383 | 0.423117 | H | -3.54425 | -0.68376 | 1.867004 |
| C                | 1.138518 | -1.946   | -0.03124 | H | 1.72246  | 3.371056 | 0.921641 |
| C                | 1.470646 | -0.54255 | 0.566935 | H | 0.274175 | 4.142846 | 1.602579 |
| C                | 3.992331 | -0.02881 | -0.25947 | H | 0.724007 | 2.49003  | 2.08471  |
| C                | 4.611898 | 0.011808 | 1.15317  | H | 0.711897 | 3.85183  | -1.16693 |
| C                | 4.365025 | -1.34253 | -0.97367 | H | -1.30332 | -3.22344 | 2.137992 |
| C                | -4.0998  | -0.1036  | 1.117559 | H | 0.449689 | -3.45372 | 2.187802 |
| C                | 0.690481 | 3.194292 | 1.247825 | H | -0.23833 | -1.86242 | 2.512594 |
| O                | -0.20054 | 3.572822 | -0.98982 | H | 1.02454  | -2.73259 | -1.80396 |
| C                | -0.34656 | -2.75906 | 1.887599 |   |          |          |          |
| O                | 1.26505  | -1.86195 | -1.44721 |   |          |          |          |

**Table S4.. DP4+ results obtained using experimental data of compound 5 *versus* isomers 5a-5d**

| Functional |      | Solvent?    | Basis Set   |            | Type of Data      |            |          |
|------------|------|-------------|-------------|------------|-------------------|------------|----------|
| mPW1PW91   |      | PCII        | 6-311G(d,p) |            | Shielding Tensors |            |          |
|            |      | DP4+        | 0.00%       | 100.00%    | 0.00%             | 0.00%      | -        |
| Nuclei     | sp2? | xperimental | Isomer 1    | Isomer 2   | Isomer 3          | Isomer 4   | Isomer 5 |
| C          | x    | 150.34      | 29.9963132  | 30.4660645 | 28.6578485        | 29.888422  |          |
| C          | x    | 121.2       | 60.6559923  | 59.1232248 | 59.1380858        | 58.9206303 |          |
| C          |      | 87.63       | 91.896291   | 94.7805839 | 92.8179325        | 94.1620483 |          |
| C          |      | 74.93       | 110.00521   | 111.260747 | 112.054249        | 108.156839 |          |
| C          |      | 39.37       | 150.034075  | 145.453329 | 146.312277        | 141.25874  |          |
| C          |      | 22.57       | 161.791613  | 159.974185 | 161.805824        | 160.864477 |          |
| C          | x    | 128.74      | 50.06382    | 50.5656532 | 49.041335         | 52.1531393 |          |
| C          | x    | 133.16      | 44.8073429  | 46.2602058 | 47.1018255        | 45.9825299 |          |
| C          |      | 39.64       | 145.484394  | 144.144856 | 145.663905        | 143.93389  |          |
| C          |      | 25          | 157.915356  | 158.833991 | 157.495743        | 158.791626 |          |
| C          | x    | 130.08      | 51.9886508  | 50.8585059 | 52.5583317        | 55.8119476 |          |
| C          | x    | 132.19      | 42.2618611  | 43.8253549 | 42.8530437        | 44.512168  |          |
| C          |      | 79.67       | 107.275425  | 108.125782 | 107.934471        | 109.534397 |          |
| C          |      | 86.05       | 95.2122679  | 94.2835959 | 95.7216244        | 97.847462  |          |
| C          |      | 27.43       | 155.490321  | 155.44348  | 154.913007        | 156.187818 |          |
| C          |      | 21.11       | 165.000747  | 166.650397 | 164.249778        | 165.397248 |          |
| C          |      | 22.57       | 166.582839  | 165.148593 | 165.664722        | 166.554474 |          |
| C          |      | 23.36       | 169.615827  | 163.917173 | 169.906948        | 171.189815 |          |
| C          |      | 15.84       | 163.668655  | 171.631476 | 161.094738        | 162.43471  |          |
| C          |      | 12.89       | 171.109143  | 169.319718 | 169.983784        | 171.877057 |          |

**Table S5.** Cartesian coordinates of all conformers of isomers **7a-7b** used after optimization at the B3LYP/ 6-311G (d,p) level of theory as required for DP4+ analysis

|              |          |          |          |              |          |          |          |
|--------------|----------|----------|----------|--------------|----------|----------|----------|
| 07_1S4R10R_3 |          |          |          | H            | -3.36102 | -3.24867 | -1.64022 |
| C            | 2.765412 | 1.037503 | -0.77217 | H            | -3.38685 | -3.85218 | 0.026604 |
| C            | 1.507437 | 1.501682 | -0.88326 | H            | 4.416004 | 1.373592 | 0.573112 |
| C            | 3.076782 | -0.38054 | -1.22395 | H            | 4.714883 | 1.910777 | -1.07206 |
| C            | 0.983309 | 2.884803 | -0.58628 | H            | 3.672056 | 2.875014 | -0.01558 |
| C            | 3.527864 | -1.40503 | -0.15688 | H            | -3.34856 | 2.769155 | 1.486308 |
| C            | 0.012741 | 3.005954 | 0.617051 | H            | -1.9446  | 2.333739 | 2.477614 |
| C            | -1.48141 | 2.68383  | 0.361689 | H            | -2.15712 | 4.008364 | 1.931897 |
| C            | -1.68072 | 1.279269 | -0.17258 | H            | -2.80595 | 3.389775 | -0.90323 |
| C            | -2.17299 | 0.218996 | 0.475612 | H            | 1.971189 | -4.28895 | 0.572228 |
| C            | -2.25067 | -1.18215 | -0.08472 | H            | 0.338183 | -4.13338 | -0.09215 |
| C            | 2.534318 | -1.61577 | 0.995769 | H            | 1.733862 | -3.5802  | -1.01957 |
| C            | 1.212169 | -2.26926 | 0.631744 | H            | 5.416576 | -0.89038 | -0.23859 |
| C            | 0.060331 | -1.65354 | 0.949242 | 07_1S4R10R_4 |          |          |          |
| C            | -1.35557 | -2.13513 | 0.766287 | C            | -2.71996 | 1.199767 | 0.655733 |
| C            | -3.72504 | -1.68185 | -0.15942 | C            | -1.44245 | 1.59157  | 0.814515 |
| C            | -4.58219 | -0.76148 | -1.04324 | C            | -3.14768 | -0.16526 | 1.172227 |
| C            | -3.84158 | -3.13151 | -0.65977 | C            | -0.81563 | 2.922664 | 0.480453 |
| C            | 3.943055 | 1.852839 | -0.29034 | C            | -3.65188 | -1.216   | 0.155969 |
| C            | -2.28066 | 2.959809 | 1.64419  | C            | 0.215223 | 2.92877  | -0.67842 |
| O            | -1.89505 | 3.622194 | -0.65919 | C            | 1.670762 | 2.513567 | -0.34369 |
| C            | 1.306743 | -3.63519 | -0.00928 | C            | 1.739842 | 1.120847 | 0.249821 |
| O            | 4.769247 | -1.04576 | 0.467924 | C            | 2.152461 | -0.00368 | -0.34442 |
| H            | 0.765715 | 0.798539 | -1.25689 | C            | 2.074913 | -1.37812 | 0.277727 |
| H            | 3.872994 | -0.34405 | -1.98679 | C            | -2.65345 | -1.57433 | -0.95497 |
| H            | 2.197944 | -0.80267 | -1.72629 | C            | -1.38696 | -2.28841 | -0.51487 |
| H            | 1.817669 | 3.56947  | -0.4043  | C            | -0.19065 | -1.7773  | -0.85119 |
| H            | 0.463307 | 3.27124  | -1.47323 | C            | 1.190335 | -2.31995 | -0.59339 |
| H            | 3.666281 | -2.36271 | -0.68351 | C            | 3.472386 | -2.00892 | 0.5663   |
| H            | 0.366495 | 2.381693 | 1.445941 | C            | 4.385889 | -2.10029 | -0.66719 |
| H            | 0.039424 | 4.04642  | 0.966779 | C            | 4.186354 | -1.26864 | 1.707023 |
| H            | -1.35713 | 1.154446 | -1.20566 | C            | -3.81383 | 2.059986 | 0.066468 |
| H            | -2.51033 | 0.323322 | 1.508736 | C            | 2.541591 | 2.678815 | -1.59813 |
| H            | -1.84736 | -1.16828 | -1.10849 | O            | 2.108082 | 3.459887 | 0.659293 |
| H            | 2.352598 | -0.6504  | 1.480805 | C            | -1.58411 | -3.59164 | 0.225206 |
| H            | 3.054477 | -2.24956 | 1.729928 | O            | -4.84781 | -0.80476 | -0.52291 |
| H            | 0.143567 | -0.67405 | 1.417856 | H            | -0.76864 | 0.86678  | 1.266843 |
| H            | -1.37306 | -3.13173 | 0.319782 | H            | -3.95585 | -0.02569 | 1.910438 |
| H            | -1.82481 | -2.23274 | 1.759462 | H            | -2.31499 | -0.62159 | 1.721386 |
| H            | -4.13344 | -1.6446  | 0.86309  | H            | -1.59502 | 3.648305 | 0.22707  |
| H            | -5.62703 | -1.09343 | -1.04973 | H            | -0.31456 | 3.317921 | 1.374346 |
| H            | -4.5566  | 0.275913 | -0.69626 | H            | -3.87569 | -2.12538 | 0.735999 |
| H            | -4.22321 | -0.77401 | -2.08115 | H            | -0.14418 | 2.297838 | -1.49977 |
| H            | -4.89566 | -3.41045 | -0.77444 | H            | 0.277107 | 3.954291 | -1.06591 |

|              |          |          |          |              |          |          |          |
|--------------|----------|----------|----------|--------------|----------|----------|----------|
| H            | 1.373916 | 1.066678 | 1.27504  | C            | 3.943256 | 1.852055 | -0.28983 |
| H            | 2.520232 | 0.032757 | -1.37029 | C            | -2.27979 | 2.960228 | 1.643966 |
| H            | 1.569669 | -1.27733 | 1.248708 | O            | -1.89422 | 3.622154 | -0.65961 |
| H            | -2.39624 | -0.65882 | -1.49933 | C            | 1.305574 | -3.63429 | -0.0115  |
| H            | -3.20303 | -2.21968 | -1.65693 | O            | 4.768795 | -1.04668 | 0.468593 |
| H            | -0.19907 | -0.83222 | -1.3928  | H            | 0.766035 | 0.798405 | -1.25755 |
| H            | 1.156973 | -3.30322 | -0.11145 | H            | 3.873448 | -0.3448  | -1.98631 |
| H            | 1.688217 | -2.46809 | -1.56356 | H            | 2.19823  | -0.80315 | -1.72643 |
| H            | 3.27708  | -3.03598 | 0.910177 | H            | 1.818429 | 3.569188 | -0.40506 |
| H            | 5.31065  | -2.63243 | -0.41498 | H            | 0.463823 | 3.271025 | -1.47367 |
| H            | 3.914201 | -2.63823 | -1.49681 | H            | 3.665864 | -2.36346 | -0.68312 |
| H            | 4.670307 | -1.1049  | -1.02932 | H            | 0.367337 | 2.381826 | 1.445606 |
| H            | 5.144355 | -1.74643 | 1.944341 | H            | 0.040301 | 4.046539 | 0.966301 |
| H            | 4.389238 | -0.22624 | 1.433729 | H            | -1.35635 | 1.154171 | -1.20554 |
| H            | 3.579234 | -1.2618  | 2.620455 | H            | -2.51025 | 0.323983 | 1.508867 |
| H            | -4.27509 | 1.563893 | -0.79355 | H            | -1.84727 | -1.16837 | -1.10793 |
| H            | -4.61837 | 2.21401  | 0.80078  | H            | 2.352212 | -0.65092 | 1.481012 |
| H            | -3.45975 | 3.044312 | -0.24889 | H            | 3.053526 | -2.25037 | 1.730007 |
| H            | 3.582931 | 2.409306 | -1.38659 | H            | 0.143264 | -0.67505 | 1.420258 |
| H            | 2.190622 | 2.051067 | -2.42412 | H            | -1.37395 | -3.13174 | 0.320832 |
| H            | 2.515277 | 3.722661 | -1.92584 | H            | -1.82577 | -2.2323  | 1.760233 |
| H            | 2.991241 | 3.177131 | 0.948051 | H            | -4.13386 | -1.64405 | 0.863236 |
| H            | -2.26623 | -4.25149 | -0.3285  | H            | -5.62708 | -1.09229 | -1.04967 |
| H            | -0.64914 | -4.13428 | 0.383205 | H            | -4.5565  | 0.276818 | -0.69579 |
| H            | -2.04098 | -3.43164 | 1.210962 | H            | -4.22309 | -0.77287 | -2.08086 |
| H            | -5.49555 | -0.55328 | 0.154961 | H            | -4.89621 | -3.40953 | -0.77459 |
| 07_1S4R10R_5 |          |          |          | H            | -3.36155 | -3.24773 | -1.64036 |
| C            | 2.765634 | 1.036943 | -0.77211 | H            | -3.38744 | -3.85163 | 0.026333 |
| C            | 1.507797 | 1.501363 | -0.88365 | H            | 4.41543  | 1.373013 | 0.574174 |
| C            | 3.076957 | -0.38116 | -1.22376 | H            | 4.715639 | 1.909372 | -1.07103 |
| C            | 0.983919 | 2.884618 | -0.58678 | H            | 3.672425 | 2.874434 | -0.01567 |
| C            | 3.527523 | -1.40572 | -0.15654 | H            | -3.34771 | 2.769667 | 1.486176 |
| C            | 0.013555 | 3.006037 | 0.616693 | H            | -1.94373 | 2.334251 | 2.477469 |
| C            | -1.48063 | 2.683951 | 0.361464 | H            | -2.15611 | 4.008816 | 1.931502 |
| C            | -1.6801  | 1.279302 | -0.17253 | H            | -2.80526 | 3.389905 | -0.90333 |
| C            | -2.17278 | 0.219312 | 0.475819 | H            | 1.971162 | -4.28857 | 0.568113 |
| C            | -2.25084 | -1.18192 | -0.08426 | H            | 0.337082 | -4.13274 | -0.09359 |
| C            | 2.533692 | -1.61628 | 0.99586  | H            | 1.731148 | -3.57772 | -1.02235 |
| C            | 1.211399 | -2.26927 | 0.631524 | H            | 5.416109 | -0.89061 | -0.23778 |
| C            | 0.059744 | -1.65389 | 0.950343 | 07_1S4R10R_6 |          |          |          |
| C            | -1.35627 | -2.13506 | 0.76715  | C            | 2.772053 | 1.052328 | -0.74877 |
| C            | -3.72534 | -1.6812  | -0.15923 | C            | 1.515718 | 1.526893 | -0.82926 |
| C            | -4.5822  | -0.7605  | -1.04298 | C            | 3.063507 | -0.36158 | -1.22595 |
| C            | -3.84209 | -3.13075 | -0.65987 | C            | 1.009396 | 2.906973 | -0.49086 |

|   |          |          |          |              |          |          |          |
|---|----------|----------|----------|--------------|----------|----------|----------|
| C | 3.522546 | -1.40329 | -0.1787  | H            | -3.41568 | 2.770637 | 1.375962 |
| C | -0.02044 | 2.99568  | 0.664619 | H            | -2.03702 | 2.383759 | 2.432313 |
| C | -1.5109  | 2.688331 | 0.336672 | H            | -2.26476 | 4.039849 | 1.841554 |
| C | -1.69904 | 1.276474 | -0.18686 | H            | -1.59039 | 3.380048 | -1.50958 |
| C | -2.17515 | 0.215824 | 0.470532 | H            | 1.97382  | -4.29165 | 0.56392  |
| C | -2.24492 | -1.19001 | -0.07944 | H            | 0.334568 | -4.13597 | -0.08473 |
| C | 2.542529 | -1.62154 | 0.984285 | H            | 1.72118  | -3.58361 | -1.02584 |
| C | 1.216081 | -2.27167 | 0.630042 | H            | 5.415812 | -0.908   | -0.27941 |
| C | 0.067233 | -1.65378 | 0.954526 | 07_1S4R10R_7 |          |          |          |
| C | -1.35    | -2.13468 | 0.780042 | C            | 2.772786 | 1.051678 | -0.74878 |
| C | -3.71835 | -1.69272 | -0.15575 | C            | 1.516368 | 1.526237 | -0.82797 |
| C | -4.57159 | -0.78285 | -1.0542  | C            | 3.063712 | -0.36243 | -1.22577 |
| C | -3.83106 | -3.14811 | -0.64021 | C            | 1.010529 | 2.90649  | -0.48967 |
| C | 3.965483 | 1.849609 | -0.27611 | C            | 3.522308 | -1.40408 | -0.17827 |
| C | -2.36114 | 2.982484 | 1.575797 | C            | -0.02013 | 2.995681 | 0.664974 |
| O | -1.98756 | 3.623643 | -0.65818 | C            | -1.51041 | 2.688585 | 0.336339 |
| C | 1.303958 | -3.63799 | -0.01139 | C            | -1.69866 | 1.276647 | -0.18695 |
| O | 4.774759 | -1.06079 | 0.433374 | C            | -2.17529 | 0.216241 | 0.470459 |
| H | 0.761494 | 0.836272 | -1.2007  | C            | -2.24529 | -1.18966 | -0.07937 |
| H | 3.847522 | -0.3209  | -2.0009  | C            | 2.541961 | -1.62191 | 0.984503 |
| H | 2.172939 | -0.76976 | -1.71898 | C            | 1.215372 | -2.27161 | 0.629967 |
| H | 1.847714 | 3.560423 | -0.23136 | C            | 0.066654 | -1.65372 | 0.954861 |
| H | 0.565615 | 3.360763 | -1.39143 | C            | -1.35066 | -2.1344  | 0.780219 |
| H | 3.646859 | -2.35464 | -0.71986 | C            | -3.71886 | -1.69207 | -0.15572 |
| H | 0.302028 | 2.344858 | 1.486892 | C            | -4.5719  | -0.78216 | -1.05431 |
| H | -0.00515 | 4.025002 | 1.045744 | C            | -3.8319  | -3.14748 | -0.64002 |
| H | -1.37319 | 1.131862 | -1.21912 | C            | 3.966744 | 1.848964 | -0.27751 |
| H | -2.5129  | 0.326449 | 1.502814 | C            | -2.36126 | 2.983324 | 1.574937 |
| H | -1.8391  | -1.18266 | -1.10248 | O            | -1.98646 | 3.623671 | -0.65901 |
| H | 2.36737  | -0.65981 | 1.478916 | C            | 1.302921 | -3.63756 | -0.01234 |
| H | 3.070656 | -2.26148 | 1.707174 | O            | 4.774445 | -1.06177 | 0.434018 |
| H | 0.154351 | -0.67396 | 1.421959 | H            | 0.761715 | 0.835451 | -1.19824 |
| H | -1.36973 | -3.13608 | 0.344696 | H            | 3.84775  | -0.32217 | -2.00072 |
| H | -1.81703 | -2.22062 | 1.775252 | H            | 2.17301  | -0.77034 | -1.71876 |
| H | -4.13169 | -1.64437 | 0.86428  | H            | 1.849003 | 3.559411 | -0.22931 |
| H | -5.61671 | -1.11397 | -1.05937 | H            | 0.567901 | 3.360814 | -1.39059 |
| H | -4.54531 | 0.259245 | -0.7222  | H            | 3.646475 | -2.35558 | -0.71922 |
| H | -4.20966 | -0.81063 | -2.09088 | H            | 0.301677 | 2.34498  | 1.487615 |
| H | -4.88437 | -3.42846 | -0.75848 | H            | -0.00478 | 4.025092 | 1.045862 |
| H | -3.34441 | -3.27631 | -1.61633 | H            | -1.37252 | 1.131797 | -1.21909 |
| H | -3.38072 | -3.86114 | 0.05702  | H            | -2.51339 | 0.327128 | 1.502602 |
| H | 4.452426 | 1.348935 | 0.567005 | H            | -1.83945 | -1.18243 | -1.10239 |
| H | 4.720222 | 1.916346 | -1.07349 | H            | 2.367022 | -0.66008 | 1.47902  |
| H | 3.71013  | 2.868564 | 0.023963 | H            | 3.069707 | -2.26198 | 1.70756  |

|              |          |          |          |              |          |          |          |
|--------------|----------|----------|----------|--------------|----------|----------|----------|
| H            | 0.153915 | -0.67416 | 1.422824 | H            | -0.75835 | 0.900307 | 1.194204 |
| H            | -1.37044 | -3.13582 | 0.344912 | H            | -3.92638 | -0.00781 | 1.927118 |
| H            | -1.81775 | -2.22024 | 1.775407 | H            | -2.2845  | -0.59266 | 1.709504 |
| H            | -4.13223 | -1.64353 | 0.864294 | H            | -1.61968 | 3.62789  | 0.029135 |
| H            | -5.61703 | -1.11324 | -1.05967 | H            | -0.4174  | 3.41421  | 1.269518 |
| H            | -4.54563 | 0.259936 | -0.72231 | H            | -3.85596 | -2.11834 | 0.77131  |
| H            | -4.20978 | -0.80995 | -2.09093 | H            | -0.06881 | 2.238369 | -1.53973 |
| H            | -4.88527 | -3.42758 | -0.75834 | H            | 0.326646 | 3.9146   | -1.1562  |
| H            | -3.34521 | -3.27592 | -1.61608 | H            | 1.402088 | 1.043111 | 1.301502 |
| H            | -3.38181 | -3.86055 | 0.05733  | H            | 2.516193 | 0.038399 | -1.36259 |
| H            | 4.454145 | 1.348552 | 0.565509 | H            | 1.565014 | -1.29439 | 1.244907 |
| H            | 4.720875 | 1.915235 | -1.07548 | H            | -2.4138  | -0.6646  | -1.49683 |
| H            | 3.711822 | 2.868093 | 0.022381 | H            | -3.22175 | -2.22675 | -1.63591 |
| H            | -3.41578 | 2.771931 | 1.374512 | H            | -0.21244 | -0.82635 | -1.39388 |
| H            | -2.03791 | 2.384564 | 2.431718 | H            | 1.152627 | -3.30639 | -0.13999 |
| H            | -2.26453 | 4.040684 | 1.840581 | H            | 1.679039 | -2.45106 | -1.58181 |
| H            | -1.58686 | 3.381287 | -1.50963 | H            | 3.26695  | -3.05573 | 0.884559 |
| H            | 1.974607 | -4.29097 | 0.561087 | H            | 5.301524 | -2.64226 | -0.43453 |
| H            | 0.333745 | -4.13625 | -0.08372 | H            | 3.905929 | -2.62568 | -1.51732 |
| H            | 1.717747 | -3.58229 | -1.02772 | H            | 4.668782 | -1.10275 | -1.02623 |
| H            | 5.415366 | -0.90787 | -0.27864 | H            | 5.137551 | -1.78411 | 1.936143 |
| 07_1S4R10R_8 |          |          |          | H            | 4.385116 | -0.25537 | 1.446812 |
| C            | -2.72827 | 1.212991 | 0.631385 | H            | 3.573343 | -1.30667 | 2.618793 |
| C            | -1.44916 | 1.613445 | 0.749541 | H            | -4.32818 | 1.545743 | -0.77528 |
| C            | -3.13268 | -0.14902 | 1.173952 | H            | -4.62647 | 2.217222 | 0.819374 |
| C            | -0.83966 | 2.939935 | 0.368798 | H            | -3.50807 | 3.040361 | -0.27705 |
| C            | -3.6478  | -1.21414 | 0.177811 | H            | 3.656619 | 2.42002  | -1.24969 |
| C            | 0.25371  | 2.905332 | -0.73061 | H            | 2.308253 | 2.09432  | -2.36382 |
| C            | 1.701699 | 2.516988 | -0.31076 | H            | 2.62839  | 3.751267 | -1.82043 |
| C            | 1.763542 | 1.11779  | 0.273543 | H            | 1.717119 | 3.29535  | 1.501692 |
| C            | 2.154442 | -0.00578 | -0.33494 | H            | -2.26758 | -4.25397 | -0.32999 |
| C            | 2.069949 | -1.38634 | 0.272701 | H            | -0.64561 | -4.13741 | 0.370613 |
| C            | -2.66385 | -1.57734 | -0.94453 | H            | -2.03227 | -3.43989 | 1.210952 |
| C            | -1.3924  | -2.28897 | -0.51525 | H            | -5.49821 | -0.57009 | 0.199771 |
| C            | -0.19909 | -1.77362 | -0.85601 | 07_1S4R10R_9 |          |          |          |
| C            | 1.183619 | -2.31659 | -0.60844 | C            | 2.79319  | 0.885204 | -0.89193 |
| C            | 3.465577 | -2.02469 | 0.5546   | C            | 1.567256 | 1.436535 | -0.90066 |
| C            | 4.379491 | -2.10211 | -0.67954 | C            | 2.947837 | -0.52895 | -1.42226 |
| C            | 4.180572 | -1.30104 | 1.7053   | C            | 1.117933 | 2.786451 | -0.40794 |
| C            | -3.84437 | 2.057976 | 0.062464 | C            | 3.27583  | -1.63291 | -0.38292 |
| C            | 2.632498 | 2.700848 | -1.51292 | C            | 0.130547 | 2.739766 | 0.786634 |
| O            | 2.189591 | 3.460048 | 0.670064 | C            | -1.36086 | 2.446646 | 0.47871  |
| C            | -1.58231 | -3.59539 | 0.221266 | C            | -1.5607  | 1.15267  | -0.29066 |
| O            | -4.85695 | -0.81761 | -0.48566 | C            | -1.9601  | -0.03349 | 0.18032  |

|   |          |          |          |               |          |          |          |
|---|----------|----------|----------|---------------|----------|----------|----------|
| C | -2.0662  | -1.29479 | -0.64634 | H             | -0.53205 | -1.93035 | 2.557032 |
| C | 2.527897 | -1.54876 | 0.951332 | H             | 1.096961 | -2.30674 | 3.139913 |
| C | 1.039001 | -1.82937 | 1.032775 | H             | 5.185057 | -1.62418 | -0.8266  |
| C | 0.266415 | -2.17029 | -0.01108 | 07_1S4R10R_10 |          |          |          |
| C | -1.2183  | -2.44125 | -0.01671 | C             | 2.762748 | 1.050997 | -0.76742 |
| C | -3.54042 | -1.74778 | -0.89026 | C             | 1.503112 | 1.509318 | -0.88644 |
| C | -4.33826 | -1.99518 | 0.400502 | C             | 3.084204 | -0.36209 | -1.23142 |
| C | -4.28356 | -0.75893 | -1.80009 | C             | 0.970897 | 2.890082 | -0.59109 |
| C | 4.054989 | 1.561326 | -0.41169 | C             | 3.535321 | -1.39186 | -0.17838 |
| C | -2.15923 | 2.489369 | 1.790843 | C             | 0.002475 | 3.009755 | 0.614166 |
| O | -1.78543 | 3.542724 | -0.36447 | C             | -1.49068 | 2.680451 | 0.362609 |
| C | 0.523553 | -1.67536 | 2.447372 | C             | -1.68389 | 1.274641 | -0.17024 |
| O | 4.664423 | -1.60067 | -0.00781 | C             | -2.17405 | 0.21356  | 0.478145 |
| H | 0.771047 | 0.813354 | -1.2986  | C             | -2.24601 | -1.1883  | -0.0811  |
| H | 3.745306 | -0.56374 | -2.18303 | C             | 2.542948 | -1.60855 | 0.98231  |
| H | 2.027525 | -0.81337 | -1.94235 | C             | 1.218866 | -2.26491 | 0.628388 |
| H | 1.981069 | 3.386935 | -0.10164 | C             | 0.067332 | -1.65174 | 0.951692 |
| H | 0.634463 | 3.33955  | -1.22493 | C             | -1.34787 | -2.13657 | 0.77175  |
| H | 3.059432 | -2.60339 | -0.85856 | C             | -3.71821 | -1.6941  | -0.15655 |
| H | 0.480768 | 2.006635 | 1.522759 | C             | -4.57843 | -0.77738 | -1.04119 |
| H | 0.14695  | 3.721388 | 1.278226 | C             | -3.82848 | -3.14428 | -0.65694 |
| H | -1.32286 | 1.239597 | -1.35112 | C             | 3.931916 | 1.87278  | -0.27691 |
| H | -2.20175 | -0.13758 | 1.23822  | C             | -2.28877 | 2.953483 | 1.646464 |
| H | -1.64099 | -1.0822  | -1.63839 | O             | -1.9111  | 3.615993 | -0.65807 |
| H | 2.707973 | -0.55117 | 1.376607 | C             | 1.313684 | -3.62888 | -0.01689 |
| H | 3.04116  | -2.24385 | 1.63228  | O             | 4.809534 | -0.97363 | 0.330268 |
| H | 0.731976 | -2.24835 | -0.99254 | H             | 0.767099 | 0.804145 | -1.26775 |
| H | -1.4086  | -3.35288 | -0.60162 | H             | 3.88761  | -0.31629 | -1.98182 |
| H | -1.5847  | -2.64619 | 0.994152 | H             | 2.206789 | -0.78292 | -1.73597 |
| H | -3.47599 | -2.70603 | -1.4277  | H             | 1.801716 | 3.579943 | -0.4127  |
| H | -5.33606 | -2.3817  | 0.161773 | H             | 0.446871 | 3.271643 | -1.47774 |
| H | -3.85186 | -2.72565 | 1.056252 | H             | 3.668038 | -2.34582 | -0.71296 |
| H | -4.47432 | -1.06837 | 0.970792 | H             | 0.360649 | 2.38873  | 1.443654 |
| H | -5.29795 | -1.11444 | -2.01697 | H             | 0.024977 | 4.051049 | 0.961845 |
| H | -4.36627 | 0.226584 | -1.32696 | H             | -1.35769 | 1.149647 | -1.20243 |
| H | -3.7623  | -0.62704 | -2.75618 | H             | -2.51391 | 0.317761 | 1.510469 |
| H | 4.568769 | 0.94364  | 0.333166 | H             | -1.84183 | -1.17398 | -1.10447 |
| H | 4.76133  | 1.685077 | -1.24574 | H             | 2.365924 | -0.64556 | 1.473589 |
| H | 3.873509 | 2.549552 | 0.018895 | H             | 3.056791 | -2.25123 | 1.717878 |
| H | -3.22512 | 2.317392 | 1.601289 | H             | 0.150194 | -0.67276 | 1.421449 |
| H | -1.81584 | 1.730769 | 2.502225 | H             | -1.36361 | -3.13463 | 0.328557 |
| H | -2.04537 | 3.47267  | 2.257861 | H             | -1.81549 | -2.23184 | 1.765902 |
| H | -2.69764 | 3.352406 | -0.63847 | H             | -4.12752 | -1.65831 | 0.865663 |
| H | 0.653549 | -0.64019 | 2.792511 | H             | -5.62195 | -1.1134  | -1.04805 |

|               |          |          |          |               |          |          |          |
|---------------|----------|----------|----------|---------------|----------|----------|----------|
| H             | -4.55698 | 0.260245 | -0.69465 | H             | 3.667737 | -2.3462  | -0.71286 |
| H             | -4.21885 | -0.78896 | -2.0789  | H             | 0.361038 | 2.388645 | 1.443389 |
| H             | -4.88131 | -3.42746 | -0.77262 | H             | 0.025447 | 4.051002 | 0.961633 |
| H             | -3.34653 | -3.25945 | -1.63693 | H             | -1.35737 | 1.149444 | -1.20236 |
| H             | -3.37157 | -3.86328 | 0.029787 | H             | -2.51388 | 0.318148 | 1.510591 |
| H             | 4.393794 | 1.404902 | 0.598275 | H             | -1.84178 | -1.174   | -1.10411 |
| H             | 4.716952 | 1.916928 | -1.04482 | H             | 2.365744 | -0.64573 | 1.47359  |
| H             | 3.654176 | 2.89796  | -0.01996 | H             | 3.056329 | -2.25154 | 1.717836 |
| H             | -3.35612 | 2.75801  | 1.49074  | H             | 0.150082 | -0.67321 | 1.422687 |
| H             | -1.94834 | 2.329331 | 2.479592 | H             | -1.36407 | -3.13462 | 0.329269 |
| H             | -2.16945 | 4.002739 | 1.933397 | H             | -1.81594 | -2.23149 | 1.766409 |
| H             | -2.82106 | 3.378414 | -0.90065 | H             | -4.12769 | -1.65821 | 0.865789 |
| H             | 1.984938 | -4.28249 | 0.557231 | H             | -5.622   | -1.11311 | -1.04802 |
| H             | 0.346476 | -4.13062 | -0.09309 | H             | -4.55721 | 0.260564 | -0.69415 |
| H             | 1.732105 | -3.56933 | -1.03046 | H             | -4.21881 | -0.78826 | -2.07861 |
| H             | 5.096905 | -1.6404  | 0.974654 | H             | -4.88141 | -3.42717 | -0.77263 |
| 07_1S4R10R_11 |          |          |          | H             | -3.34676 | -3.25886 | -1.63713 |
| C             | 2.762881 | 1.050717 | -0.76739 | H             | -3.37151 | -3.86303 | 0.029478 |
| C             | 1.503333 | 1.509188 | -0.88675 | H             | 4.392573 | 1.4049   | 0.599793 |
| C             | 3.084374 | -0.36236 | -1.23144 | H             | 4.717871 | 1.915382 | -1.04335 |
| C             | 0.97123  | 2.889992 | -0.59136 | H             | 3.654441 | 2.897822 | -0.02049 |
| C             | 3.535158 | -1.39219 | -0.17831 | H             | -3.35576 | 2.758618 | 1.49059  |
| C             | 0.002872 | 3.00972  | 0.613936 | H             | -1.94804 | 2.32957  | 2.479395 |
| C             | -1.49032 | 2.680503 | 0.362432 | H             | -2.16873 | 4.00303  | 1.933169 |
| C             | -1.68365 | 1.274659 | -0.17022 | H             | -2.82059 | 3.378256 | -0.90105 |
| C             | -2.17401 | 0.213742 | 0.478297 | H             | 1.9849   | -4.28223 | 0.555156 |
| C             | -2.24611 | -1.18817 | -0.0808  | H             | 0.345871 | -4.13025 | -0.09371 |
| C             | 2.542634 | -1.60873 | 0.982275 | H             | 1.730638 | -3.56811 | -1.03187 |
| C             | 1.21848  | -2.26484 | 0.628248 | H             | 5.095937 | -1.64029 | 0.975901 |
| C             | 0.06705  | -1.65187 | 0.952285 | 07_1S4R10R_12 |          |          |          |
| C             | -1.34822 | -2.13649 | 0.772288 | C             | -2.70773 | 1.217939 | 0.641438 |
| C             | -3.71834 | -1.69383 | -0.15641 | C             | -1.43405 | 1.607706 | 0.834273 |
| C             | -4.57851 | -0.77699 | -1.04094 | C             | -3.15765 | -0.13311 | 1.17876  |
| C             | -3.82858 | -3.14394 | -0.65705 | C             | -0.79477 | 2.933786 | 0.501659 |
| C             | 3.931945 | 1.87229  | -0.27631 | C             | -3.66436 | -1.19437 | 0.184129 |
| C             | -2.28834 | 2.953799 | 1.646275 | C             | 0.229361 | 2.9378   | -0.66304 |
| O             | -1.91067 | 3.615939 | -0.6584  | C             | 1.682442 | 2.507157 | -0.33893 |
| C             | 1.313047 | -3.62838 | -0.018   | C             | 1.740755 | 1.111566 | 0.248323 |
| O             | 4.809367 | -0.9742  | 0.330459 | C             | 2.149509 | -0.01264 | -0.349   |
| H             | 0.767343 | 0.804164 | -1.2684  | C             | 2.065931 | -1.38817 | 0.269505 |
| H             | 3.888001 | -0.31653 | -1.98159 | C             | -2.66998 | -1.56734 | -0.93415 |
| H             | 2.207054 | -0.78306 | -1.73625 | C             | -1.40009 | -2.28217 | -0.50331 |
| H             | 1.802118 | 3.57977  | -0.41294 | C             | -0.20536 | -1.77667 | -0.85339 |
| H             | 0.44724  | 3.271648 | -1.47798 | C             | 1.175386 | -2.32322 | -0.60254 |



|               |          |          |          |   |          |          |          |
|---------------|----------|----------|----------|---|----------|----------|----------|
| C             | 3.460929 | -2.0266  | 0.553554 | C | -1.44941 | 1.613226 | 0.749897 |
| C             | 4.371465 | -2.11925 | -0.68207 | C | -3.13312 | -0.14919 | 1.173759 |
| C             | 4.180794 | -1.2926  | 1.694622 | C | -0.83983 | 2.93976  | 0.369441 |
| C             | -3.77627 | 2.074825 | 0.003515 | C | -3.64788 | -1.21437 | 0.177521 |
| C             | 2.548089 | 2.669713 | -1.59725 | C | 0.253376 | 2.90544  | -0.73011 |
| O             | 2.134893 | 3.4444   | 0.665973 | C | 1.70148  | 2.517052 | -0.31055 |
| C             | -1.59504 | -3.57879 | 0.248931 | C | 1.763411 | 1.117775 | 0.273532 |
| O             | -4.8919  | -0.71686 | -0.38382 | C | 2.154391 | -0.00572 | -0.33503 |
| H             | -0.77719 | 0.888046 | 1.319243 | C | 2.070065 | -1.38635 | 0.272396 |
| H             | -3.97557 | 0.027261 | 1.897492 | C | -2.6636  | -1.57767 | -0.94448 |
| H             | -2.33277 | -0.58767 | 1.739843 | C | -1.39205 | -2.2889  | -0.51484 |
| H             | -1.56892 | 3.667572 | 0.255742 | C | -0.19885 | -1.7739  | -0.85652 |
| H             | -0.2859  | 3.320648 | 1.394605 | C | 1.183894 | -2.31668 | -0.60886 |
| H             | -3.88223 | -2.09604 | 0.778036 | C | 3.465839 | -2.02455 | 0.554073 |
| H             | -0.14064 | 2.314957 | -1.48588 | C | 4.379999 | -2.10081 | -0.67996 |
| H             | 0.29866  | 3.965018 | -1.04491 | C | 4.18045  | -1.30155 | 1.705414 |
| H             | 1.37206  | 1.055244 | 1.272359 | C | -3.84443 | 2.057732 | 0.061972 |
| H             | 2.519749 | 0.02539  | -1.37391 | C | 2.632034 | 2.701172 | -1.51284 |
| H             | 1.562943 | -1.28754 | 1.241634 | O | 2.1895   | 3.459985 | 0.670328 |
| H             | -2.41895 | -0.65856 | -1.49238 | C | -1.58179 | -3.59477 | 0.222716 |
| H             | -3.21582 | -2.22766 | -1.63013 | O | -4.85685 | -0.81792 | -0.48643 |
| H             | -0.21533 | -0.83522 | -1.40137 | H | -0.75877 | 0.900059 | 1.194753 |
| H             | 1.141081 | -3.30867 | -0.12519 | H | -3.92712 | -0.00791 | 1.926588 |
| H             | 1.668847 | -2.46813 | -1.57541 | H | -2.28516 | -0.59282 | 1.709685 |
| H             | 3.261414 | -3.05357 | 0.895294 | H | -1.61988 | 3.627803 | 0.030028 |
| H             | 5.293706 | -2.65736 | -0.43338 | H | -0.41751 | 3.413804 | 1.270263 |
| H             | 3.895158 | -2.65191 | -1.51248 | H | -3.8563  | -2.1185  | 0.771039 |
| H             | 4.660818 | -1.12436 | -1.04162 | H | -0.06926 | 2.238661 | -1.53933 |
| H             | 5.136983 | -1.77555 | 1.928794 | H | 0.326231 | 3.914812 | -1.15547 |
| H             | 4.388106 | -0.25053 | 1.423473 | H | 1.40187  | 1.043024 | 1.301469 |
| H             | 3.57558  | -1.2851  | 2.609288 | H | 2.516239 | 0.038612 | -1.36264 |
| H             | -4.20696 | 1.572081 | -0.86801 | H | 1.565151 | -1.29467 | 1.244639 |
| H             | -4.60967 | 2.232102 | 0.702542 | H | -2.41366 | -0.66501 | -1.49698 |
| H             | -3.40584 | 3.055038 | -0.30643 | H | -3.22126 | -2.22735 | -1.63583 |
| H             | 3.588146 | 2.390228 | -1.39242 | H | -0.21239 | -0.82714 | -1.39531 |
| H             | 2.18711  | 2.048543 | -2.42394 | H | 1.152963 | -3.30647 | -0.14039 |
| H             | 2.529362 | 3.715128 | -1.92047 | H | 1.679444 | -2.45113 | -1.58217 |
| H             | 3.015756 | 3.150097 | 0.950166 | H | 3.26744  | -3.05589 | 0.883245 |
| H             | -2.28029 | -4.2436  | -0.29526 | H | 5.301852 | -2.64144 | -0.43535 |
| H             | -0.65999 | -4.12113 | 0.406985 | H | 3.906507 | -2.62331 | -1.51845 |
| H             | -2.04665 | -3.40932 | 1.235423 | H | 4.669581 | -1.10112 | -1.02546 |
| H             | -5.21287 | -1.39918 | -0.9952  | H | 5.137609 | -1.78441 | 1.935969 |
| 07_1S4R10R_13 |          |          |          | H | 4.384619 | -0.2556  | 1.447747 |
| C             | -2.72849 | 1.21278  | 0.631271 | H | 3.573133 | -1.30814 | 2.618839 |

|               |          |          |          |               |          |          |          |
|---------------|----------|----------|----------|---------------|----------|----------|----------|
| H             | -4.32844 | 1.545122 | -0.77543 | H             | -1.63825 | -1.08572 | -1.6365  |
| H             | -4.62639 | 2.217579 | 0.818918 | H             | 2.736781 | -0.55477 | 1.371381 |
| H             | -3.50792 | 3.039832 | -0.27814 | H             | 3.048822 | -2.25449 | 1.614636 |
| H             | 3.656237 | 2.420379 | -1.24988 | H             | 0.740636 | -2.22925 | -0.99917 |
| H             | 2.307666 | 2.094782 | -2.3638  | H             | -1.38891 | -3.35455 | -0.59754 |
| H             | 2.627821 | 3.751653 | -1.82014 | H             | -1.56486 | -2.64608 | 0.997668 |
| H             | 1.717713 | 3.294712 | 1.502232 | H             | -3.46129 | -2.72264 | -1.42292 |
| H             | -2.26689 | -4.25389 | -0.32814 | H             | -5.32073 | -2.412   | 0.169939 |
| H             | -0.64503 | -4.13652 | 0.372618 | H             | -3.83254 | -2.74492 | 1.061963 |
| H             | -2.03193 | -3.43857 | 1.212202 | H             | -4.46729 | -1.09224 | 0.977281 |
| H             | -5.49832 | -0.57034 | 0.198796 | H             | -5.29581 | -1.14338 | -2.00815 |
| 07_1S4R10R_14 |          |          |          | H             | -4.37139 | 0.203822 | -1.3204  |
| C             | 2.783634 | 0.901105 | -0.88562 | H             | -3.76502 | -0.64611 | -2.75081 |
| C             | 1.555557 | 1.447507 | -0.90794 | H             | 4.538263 | 0.971597 | 0.370537 |
| C             | 2.956139 | -0.5057  | -1.43273 | H             | 4.755559 | 1.704116 | -1.20616 |
| C             | 1.096431 | 2.794992 | -0.41638 | H             | 3.840706 | 2.57289  | 0.038089 |
| C             | 3.286031 | -1.61752 | -0.41087 | H             | -3.23503 | 2.301348 | 1.611323 |
| C             | 0.114576 | 2.745743 | 0.782678 | H             | -1.81833 | 1.723274 | 2.506245 |
| C             | -1.37609 | 2.443571 | 0.481357 | H             | -2.06013 | 3.463781 | 2.263799 |
| C             | -1.56897 | 1.149046 | -0.28824 | H             | -2.72214 | 3.339207 | -0.63297 |
| C             | -1.96211 | -0.03915 | 0.182697 | H             | 0.682667 | -0.64815 | 2.797826 |
| C             | -2.06043 | -1.301   | -0.64382 | H             | -0.50697 | -1.93375 | 2.558876 |
| C             | 2.54627  | -1.54522 | 0.934649 | H             | 1.123346 | -2.31847 | 3.131786 |
| C             | 1.056264 | -1.82472 | 1.027618 | H             | 4.928855 | -2.21954 | 0.478833 |
| C             | 0.279761 | -2.1608  | -0.01487 | 07_1S4R10R_15 |          |          |          |
| C             | -1.20322 | -2.44056 | -0.01478 | C             | 2.84521  | 0.881044 | -0.89174 |
| C             | -3.53166 | -1.76495 | -0.88523 | C             | 1.602828 | 1.343408 | -0.66615 |
| C             | -4.32541 | -2.01811 | 0.406924 | C             | 3.059408 | -0.59789 | -1.18542 |
| C             | -4.2833  | -0.7812  | -1.79358 | C             | 1.151405 | 2.763413 | -0.42995 |
| C             | 4.034161 | 1.583753 | -0.38531 | C             | 3.484429 | -1.4954  | 0.002655 |
| C             | -2.16951 | 2.480021 | 1.796666 | C             | 0.141877 | 2.949108 | 0.729055 |
| O             | -1.81156 | 3.537368 | -0.35919 | C             | -1.35798 | 2.715222 | 0.408438 |
| C             | 0.548776 | -1.68053 | 2.445973 | C             | -1.61585 | 1.330418 | -0.15442 |
| O             | 4.701712 | -1.53418 | -0.17022 | C             | -2.18416 | 0.288024 | 0.460514 |
| H             | 0.766884 | 0.824151 | -1.32068 | C             | -2.31108 | -1.10031 | -0.12398 |
| H             | 3.769773 | -0.52985 | -2.17175 | C             | 2.412828 | -1.67828 | 1.096708 |
| H             | 2.042773 | -0.79067 | -1.96339 | C             | 1.093035 | -2.30066 | 0.673441 |
| H             | 1.955917 | 3.40332  | -0.11552 | C             | -0.05698 | -1.6748  | 0.978414 |
| H             | 0.605635 | 3.341932 | -1.23308 | C             | -1.47759 | -2.10866 | 0.728496 |
| H             | 3.065004 | -2.58298 | -0.89401 | C             | -3.80325 | -1.53415 | -0.23856 |
| H             | 0.471767 | 2.015863 | 1.518701 | C             | -4.60138 | -0.56202 | -1.12211 |
| H             | 0.127377 | 3.728438 | 1.272352 | C             | -3.97    | -2.96854 | -0.76754 |
| H             | -1.33123 | 1.237311 | -1.34855 | C             | 4.085501 | 1.744225 | -0.96646 |
| H             | -2.20347 | -0.14465 | 1.24054  | C             | -2.19249 | 3.022158 | 1.660873 |

|               |          |          |          |   |          |          |          |
|---------------|----------|----------|----------|---|----------|----------|----------|
| O             | -1.67344 | 3.687381 | -0.61523 | C | -1.17636 | 2.594571 | 0.419081 |
| C             | 1.18888  | -3.64251 | -0.01413 | C | -1.49924 | 1.263354 | -0.23708 |
| O             | 4.709548 | -1.05595 | 0.607444 | C | -1.97278 | 0.155286 | 0.341117 |
| H             | 0.805393 | 0.60418  | -0.6779  | C | -2.23573 | -1.15526 | -0.36452 |
| H             | 3.836566 | -0.69883 | -1.95516 | C | 2.461637 | -1.54733 | 1.005488 |
| H             | 2.1412   | -1.02614 | -1.60533 | C | 0.964262 | -1.73098 | 1.185322 |
| H             | 2.015753 | 3.406822 | -0.23407 | C | 0.116752 | -2.05853 | 0.196854 |
| H             | 0.686633 | 3.160659 | -1.34397 | C | -1.37325 | -2.28284 | 0.281876 |
| H             | 3.73434  | -2.47788 | -0.41395 | C | -3.75598 | -1.50946 | -0.34935 |
| H             | 0.418923 | 2.307102 | 1.574102 | C | -4.59877 | -0.39986 | -0.99916 |
| H             | 0.213725 | 3.986175 | 1.08127  | C | -4.06486 | -2.85138 | -1.03562 |
| H             | -1.26064 | 1.202192 | -1.17717 | C | 4.112602 | 1.333897 | -0.63467 |
| H             | -2.55097 | 0.395718 | 1.483271 | C | -1.89173 | 2.785161 | 1.765994 |
| H             | -1.8845  | -1.08757 | -1.13821 | O | -1.58809 | 3.649527 | -0.48146 |
| H             | 2.219963 | -0.70105 | 1.558352 | C | 0.539461 | -1.50715 | 2.620158 |
| H             | 2.878424 | -2.30985 | 1.868505 | O | 4.561739 | -1.80569 | -0.17429 |
| H             | 0.032215 | -0.71817 | 1.491397 | H | 0.762444 | 0.731376 | -1.37042 |
| H             | -1.50744 | -3.08956 | 0.248536 | H | 3.637759 | -0.89745 | -2.21655 |
| H             | -1.98628 | -2.22343 | 1.699976 | H | 1.904235 | -1.01065 | -1.9432  |
| H             | -4.23122 | -1.49797 | 0.776011 | H | 2.168423 | 3.304188 | -0.40896 |
| H             | -5.65854 | -0.85007 | -1.15836 | H | 0.757139 | 3.254387 | -1.44983 |
| H             | -4.54149 | 0.466458 | -0.75331 | H | 2.817666 | -2.77659 | -0.74087 |
| H             | -4.21956 | -0.5691  | -2.15183 | H | 0.695795 | 2.116344 | 1.387315 |
| H             | -5.03237 | -3.20174 | -0.90508 | H | 0.441698 | 3.828445 | 1.045965 |
| H             | -3.47735 | -3.08815 | -1.74166 | H | -1.3066  | 1.251605 | -1.31009 |
| H             | -3.55723 | -3.71892 | -0.08651 | H | -2.18077 | 0.150674 | 1.412555 |
| H             | 4.924393 | 1.271691 | -0.444   | H | -1.93017 | -1.05115 | -1.41714 |
| H             | 4.406187 | 1.861179 | -2.01197 | H | 2.729925 | -0.53502 | 1.339341 |
| H             | 3.938858 | 2.746253 | -0.55438 | H | 2.953588 | -2.22079 | 1.727934 |
| H             | -3.26208 | 2.895494 | 1.456852 | H | 0.521697 | -2.18698 | -0.80573 |
| H             | -1.92796 | 2.368255 | 2.498731 | H | -1.59768 | -3.22525 | -0.2315  |
| H             | -2.02098 | 4.05849  | 1.967791 | H | -1.70031 | -2.41494 | 1.319886 |
| H             | -2.58269 | 3.507435 | -0.90538 | H | -4.06164 | -1.59078 | 0.705884 |
| H             | 1.802297 | -4.33595 | 0.577601 | H | -5.66617 | -0.64403 | -0.94488 |
| H             | 0.214275 | -4.11017 | -0.17175 | H | -4.44552 | 0.567651 | -0.51243 |
| H             | 1.675822 | -3.55894 | -0.99508 | H | -4.3383  | -0.28392 | -2.05983 |
| H             | 4.49961  | -0.2689  | 1.136097 | H | -5.1481  | -3.01506 | -1.07888 |
| 07_1S4R10R_16 |          |          |          | H | -3.68879 | -2.85857 | -2.06735 |
| C             | 2.7986   | 0.703269 | -1.02882 | H | -3.628   | -3.707   | -0.51204 |
| C             | 1.608962 | 1.328547 | -1.04179 | H | 4.003775 | 2.363356 | -0.2834  |
| C             | 2.851958 | -0.75132 | -1.46178 | H | 4.608835 | 0.748083 | 0.146841 |
| C             | 1.259501 | 2.732436 | -0.62411 | H | 4.802471 | 1.341691 | -1.49067 |
| C             | 3.134697 | -1.7941  | -0.35553 | H | -2.97629 | 2.677951 | 1.648599 |
| C             | 0.343473 | 2.819738 | 0.623543 | H | -1.55909 | 2.055956 | 2.512511 |

|               |          |          |          |               |          |          |          |
|---------------|----------|----------|----------|---------------|----------|----------|----------|
| H             | -1.68391 | 3.78833  | 2.150807 | H             | -1.69108 | -2.41254 | 1.328414 |
| H             | -2.52357 | 3.493311 | -0.69095 | H             | -4.0596  | -1.58778 | 0.709074 |
| H             | 0.780782 | -0.48273 | 2.936395 | H             | -5.66089 | -0.65977 | -0.95292 |
| H             | -0.52831 | -1.66129 | 2.78531  | H             | -4.43779 | 0.557336 | -0.54131 |
| H             | 1.085868 | -2.17716 | 3.298477 | H             | -4.33386 | -0.31906 | -2.07455 |
| H             | 4.762675 | -2.45307 | 0.520818 | H             | -5.14147 | -3.033   | -1.06248 |
| 07_1S4R10R_17 |          |          |          | H             | -3.67813 | -2.8901  | -2.04687 |
| C             | 2.802914 | 0.714797 | -1.01343 | H             | -3.6243  | -3.71894 | -0.48063 |
| C             | 1.614102 | 1.341273 | -1.00132 | H             | 4.023072 | 2.360453 | -0.2584  |
| C             | 2.846749 | -0.73496 | -1.46319 | H             | 4.632114 | 0.735818 | 0.130746 |
| C             | 1.275165 | 2.739262 | -0.55571 | H             | 4.798008 | 1.360324 | -1.49835 |
| C             | 3.135629 | -1.7889  | -0.36922 | H             | -3.0354  | 2.686906 | 1.569444 |
| C             | 0.315599 | 2.808918 | 0.660129 | H             | -1.62994 | 2.093668 | 2.483881 |
| C             | -1.20567 | 2.601284 | 0.404261 | H             | -1.77178 | 3.818345 | 2.096996 |
| C             | -1.51951 | 1.263027 | -0.24597 | H             | -1.33339 | 3.503467 | -1.34533 |
| C             | -1.97369 | 0.151173 | 0.337992 | H             | 0.804757 | -0.48873 | 2.938621 |
| C             | -2.23172 | -1.16353 | -0.36203 | H             | -0.5127  | -1.65807 | 2.78844  |
| C             | 2.471108 | -1.55346 | 0.997804 | H             | 1.099778 | -2.18614 | 3.294615 |
| C             | 0.973939 | -1.73323 | 1.183316 | H             | 4.768416 | -2.45816 | 0.489927 |
| C             | 0.122365 | -2.06036 | 0.198189 | 07_1S4R10R_18 |          |          |          |
| C             | -1.36705 | -2.28608 | 0.288793 | C             | 2.847748 | 0.59199  | -0.90363 |
| C             | -3.75174 | -1.51908 | -0.3464  | C             | 1.711118 | 1.305557 | -0.98187 |
| C             | -4.59323 | -0.41764 | -1.01178 | C             | 2.822056 | -0.85337 | -1.36701 |
| C             | -4.05829 | -2.86958 | -1.01675 | C             | 1.439398 | 2.727627 | -0.56768 |
| C             | 4.123674 | 1.337482 | -0.63042 | C             | 3.021605 | -1.94285 | -0.28116 |
| C             | -1.95882 | 2.80711  | 1.722259 | C             | 0.436411 | 2.876455 | 0.604741 |
| O             | -1.69468 | 3.655195 | -0.4572  | C             | -1.07512 | 2.746953 | 0.283599 |
| C             | 0.555473 | -1.51051 | 2.620141 | C             | -1.42827 | 1.430147 | -0.38729 |
| O             | 4.563641 | -1.80367 | -0.19737 | C             | -1.93361 | 0.3298   | 0.178824 |
| H             | 0.761228 | 0.749673 | -1.32311 | C             | -2.21408 | -0.9618  | -0.55652 |
| H             | 3.62517  | -0.87543 | -2.22644 | C             | 2.315455 | -1.70175 | 1.057068 |
| H             | 1.893559 | -0.98602 | -1.93802 | C             | 0.804546 | -1.78603 | 1.166709 |
| H             | 2.184906 | 3.288802 | -0.29303 | C             | -0.01889 | -2.08099 | 0.147886 |
| H             | 0.830975 | 3.30178  | -1.39274 | C             | -1.52657 | -2.16052 | 0.162953 |
| H             | 2.81494  | -2.76701 | -0.76232 | C             | -3.74617 | -1.17166 | -0.78415 |
| H             | 0.646276 | 2.085009 | 1.415365 | C             | -4.03558 | -2.29964 | -1.78747 |
| H             | 0.408679 | 3.806846 | 1.107789 | C             | -4.54833 | -1.37872 | 0.510887 |
| H             | -1.33472 | 1.23575  | -1.32218 | C             | 4.17609  | 1.114747 | -0.41097 |
| H             | -2.17633 | 0.149317 | 1.410399 | C             | -1.88013 | 2.990776 | 1.570126 |
| H             | -1.92625 | -1.06339 | -1.41525 | O             | -1.3492  | 3.817547 | -0.64906 |
| H             | 2.745227 | -0.54561 | 1.340161 | C             | 0.3328   | -1.49427 | 2.574725 |
| H             | 2.964431 | -2.23595 | 1.710803 | O             | 4.40921  | -2.07732 | 0.073891 |
| H             | 0.523408 | -2.19007 | -0.80593 | H             | 0.847285 | 0.780935 | -1.38139 |
| H             | -1.59112 | -3.23203 | -0.21825 | H             | 3.603352 | -1.01982 | -2.12765 |

|               |          |          |          |   |          |          |          |
|---------------|----------|----------|----------|---|----------|----------|----------|
| H             | 1.869765 | -1.04421 | -1.87222 | C | -0.68022 | -2.42807 | -0.75384 |
| H             | 2.369696 | 3.224747 | -0.27262 | C | 0.337472 | -1.64105 | -1.14234 |
| H             | 1.046706 | 3.294405 | -1.42291 | C | 1.816957 | -1.85836 | -0.97494 |
| H             | 2.671001 | -2.89669 | -0.70776 | C | 3.989198 | -1.08682 | 0.208639 |
| H             | 0.683864 | 2.153697 | 1.391282 | C | 4.588602 | -0.10293 | 1.226978 |
| H             | 0.566363 | 3.87799  | 1.035715 | C | 4.334191 | -2.52764 | 0.620526 |
| H             | -1.21057 | 1.417324 | -1.456   | C | -4.54847 | 1.870504 | 0.165245 |
| H             | -2.15235 | 0.327265 | 1.24664  | C | 1.864317 | 3.34435  | -1.37294 |
| H             | -1.76692 | -0.87604 | -1.55792 | O | 1.187274 | 3.695421 | 0.931303 |
| H             | 2.62937  | -0.71714 | 1.431913 | C | -0.53305 | -3.78657 | -0.1124  |
| H             | 2.747846 | -2.42477 | 1.764723 | O | -3.50934 | -2.92033 | 0.724455 |
| H             | 0.420575 | -2.26977 | -0.83082 | H | -1.3721  | 0.438101 | 0.473433 |
| H             | -1.82976 | -3.08824 | -0.34011 | H | -4.50471 | -0.73283 | -0.61691 |
| H             | -1.90796 | -2.22907 | 1.186551 | H | -4.59293 | -0.66709 | 1.124221 |
| H             | -4.10051 | -0.23629 | -1.24093 | H | -2.33415 | 3.36884  | 0.4779   |
| H             | -5.10178 | -2.32111 | -2.04281 | H | -1.05146 | 2.754068 | 1.486744 |
| H             | -3.47177 | -2.16201 | -2.71821 | H | -2.13316 | -1.43638 | 1.177739 |
| H             | -3.77939 | -3.28558 | -1.38209 | H | -0.6897  | 2.41362  | -1.50087 |
| H             | -5.62107 | -1.42662 | 0.289222 | H | -0.627   | 4.046494 | -0.84913 |
| H             | -4.27689 | -2.31664 | 1.009961 | H | 0.849216 | 1.096033 | 1.128312 |
| H             | -4.39573 | -0.56082 | 1.223973 | H | 2.673605 | 0.866006 | -1.32435 |
| H             | 4.578108 | 0.477244 | 0.384225 | H | 1.978201 | -1.02206 | 1.010782 |
| H             | 4.918227 | 1.093973 | -1.22256 | H | -2.09091 | -1.00729 | -1.51872 |
| H             | 4.119189 | 2.14128  | -0.03971 | H | -2.70332 | -2.6633  | -1.5023  |
| H             | -2.95636 | 2.942858 | 1.367481 | H | 0.073698 | -0.68938 | -1.60196 |
| H             | -1.64892 | 2.249875 | 2.342799 | H | 2.025671 | -2.87938 | -0.64716 |
| H             | -1.64609 | 3.983593 | 1.966632 | H | 2.319572 | -1.73397 | -1.9472  |
| H             | -2.27815 | 3.727761 | -0.91803 | H | 4.46172  | -0.89233 | -0.76732 |
| H             | 0.57976  | -0.46131 | 2.857371 | H | 5.672366 | -0.2446  | 1.312228 |
| H             | -0.7421  | -1.62693 | 2.710345 | H | 4.403078 | 0.938504 | 0.946084 |
| H             | 0.845437 | -2.14364 | 3.297565 | H | 4.15309  | -0.26074 | 2.222747 |
| H             | 4.906856 | -2.20277 | -0.74986 | H | 5.41     | -2.62195 | 0.809675 |
| 07_1S4R10R_19 |          |          |          | H | 3.811009 | -2.80714 | 1.544696 |
| C             | -3.40535 | 0.886187 | 0.283163 | H | 4.073874 | -3.26075 | -0.14893 |
| C             | -2.11226 | 1.233804 | 0.413838 | H | -5.13293 | 1.67169  | -0.74357 |
| C             | -3.89143 | -0.55598 | 0.280525 | H | -5.24474 | 1.762949 | 1.008921 |
| C             | -1.53368 | 2.625022 | 0.508211 | H | -4.22634 | 2.913005 | 0.131624 |
| C             | -2.85548 | -1.68516 | 0.386647 | H | 2.929991 | 3.283717 | -1.12391 |
| C             | -0.49522 | 2.988899 | -0.58812 | H | 1.69754  | 2.773574 | -2.2929  |
| C             | 0.998901 | 2.828635 | -0.21409 | H | 1.61928  | 4.39256  | -1.56939 |
| C             | 1.342232 | 1.413294 | 0.208658 | H | 2.087855 | 3.535957 | 1.258306 |
| C             | 2.171917 | 0.561864 | -0.40385 | H | -0.97495 | -4.5606  | -0.75566 |
| C             | 2.459102 | -0.85532 | 0.035297 | H | 0.507549 | -4.061   | 0.077376 |
| C             | -2.10268 | -1.93507 | -0.93805 | H | -1.0841  | -3.83303 | 0.833758 |

|               |          |          |          |               |          |          |          |
|---------------|----------|----------|----------|---------------|----------|----------|----------|
| H             | -3.87856 | -2.8195  | 1.616779 | H             | 5.62844  | -1.77632 | -0.37517 |
| 07_1S4R10R_20 |          |          |          | H             | 4.273623 | -2.38931 | -1.32681 |
| C             | -2.81192 | 0.987719 | 0.608768 | H             | 4.595681 | -0.64741 | -1.25881 |
| C             | -1.60382 | 1.54534  | 0.81113  | H             | -4.31819 | 1.14127  | -0.9276  |
| C             | -3.07938 | -0.41189 | 1.143599 | H             | -4.84101 | 1.712589 | 0.641005 |
| C             | -1.14558 | 2.942163 | 0.469765 | H             | -3.75297 | 2.7174   | -0.33345 |
| C             | -3.45548 | -1.52313 | 0.14518  | H             | 3.405915 | 2.984434 | -1.07069 |
| C             | -0.0393  | 3.066905 | -0.60978 | H             | 2.125504 | 2.553851 | -2.22822 |
| C             | 1.435176 | 2.821586 | -0.17477 | H             | 2.243862 | 4.212843 | -1.61461 |
| C             | 1.640958 | 1.413549 | 0.352541 | H             | 1.337064 | 3.514249 | 1.669449 |
| C             | 2.149874 | 0.363098 | -0.29685 | H             | -1.73712 | -4.3762  | -0.47553 |
| C             | 2.2271   | -1.03536 | 0.271609 | H             | -0.13133 | -4.10821 | 0.218256 |
| C             | -2.43704 | -1.74939 | -0.9909  | H             | -1.57637 | -3.60475 | 1.096811 |
| C             | -1.08851 | -2.31937 | -0.58459 | H             | -4.9851  | -1.9223  | -1.00854 |
| C             | 0.034845 | -1.65033 | -0.89389 | 07_1S4R10R_21 |          |          |          |
| C             | 1.471289 | -2.03566 | -0.65189 | C             | 2.550051 | 1.715695 | 0.20896  |
| C             | 3.699257 | -1.45848 | 0.576088 | C             | 1.228109 | 1.860495 | 0.396843 |
| C             | 3.770507 | -2.74728 | 1.411229 | C             | 3.283207 | 0.540945 | 0.830328 |
| C             | 4.592457 | -1.57119 | -0.66983 | C             | 0.332936 | 2.98391  | -0.08188 |
| C             | -3.981   | 1.689243 | -0.04226 | C             | 3.961262 | -0.436   | -0.15328 |
| C             | 2.361679 | 3.158065 | -1.34707 | C             | -0.99845 | 3.062961 | 0.698286 |
| O             | 1.800276 | 3.767789 | 0.855109 | C             | -2.21892 | 2.345252 | 0.073195 |
| C             | -1.1237  | -3.66771 | 0.098258 | C             | -1.92881 | 0.936527 | -0.42701 |
| O             | -4.74479 | -1.20715 | -0.39764 | C             | -2.16976 | -0.22481 | 0.192564 |
| H             | -0.86016 | 0.923529 | 1.305832 | C             | -1.90368 | -1.59442 | -0.39422 |
| H             | -3.90581 | -0.3609  | 1.868469 | C             | 2.986136 | -1.19072 | -1.07726 |
| H             | -2.19847 | -0.75904 | 1.695801 | C             | 1.89676  | -2.0134  | -0.40779 |
| H             | -1.9958  | 3.542134 | 0.131461 | C             | 0.634322 | -1.55596 | -0.39845 |
| H             | -0.79575 | 3.440281 | 1.388139 | C             | -0.5979  | -2.21338 | 0.180487 |
| H             | -3.54114 | -2.45089 | 0.732779 | C             | -3.11743 | -2.55871 | -0.24687 |
| H             | -0.27483 | 2.398327 | -1.44707 | C             | -3.47556 | -2.90363 | 1.208403 |
| H             | -0.07046 | 4.09309  | -0.99876 | C             | -4.34859 | -2.033   | -0.99981 |
| H             | 1.287412 | 1.259593 | 1.37448  | C             | 3.392983 | 2.692213 | -0.57783 |
| H             | 2.505096 | 0.484832 | -1.32069 | C             | -3.39056 | 2.388659 | 1.066534 |
| H             | 1.702108 | -1.02781 | 1.237446 | O             | -2.55536 | 3.150913 | -1.0812  |
| H             | -2.30008 | -0.80575 | -1.53045 | C             | 2.313592 | -3.33377 | 0.193642 |
| H             | -2.90731 | -2.45398 | -1.69817 | O             | 4.724086 | -1.41276 | 0.56786  |
| H             | -0.09136 | -0.69042 | -1.39364 | H             | 0.721787 | 1.088591 | 0.973812 |
| H             | 1.54613  | -3.04136 | -0.22878 | H             | 4.079367 | 0.93311  | 1.486112 |
| H             | 1.987275 | -2.06833 | -1.62321 | H             | 2.601465 | -0.03424 | 1.46601  |
| H             | 4.10838  | -0.6485  | 1.197179 | H             | 0.856553 | 3.942906 | 0.020907 |
| H             | 4.800094 | -2.93583 | 1.737781 | H             | 0.113027 | 2.890745 | -1.15452 |
| H             | 3.14262  | -2.67882 | 2.307989 | H             | 4.64145  | 0.132879 | -0.80788 |
| H             | 3.445658 | -3.62473 | 0.839538 | H             | -0.85033 | 2.675766 | 1.71389  |

|               |          |          |          |               |          |          |          |
|---------------|----------|----------|----------|---------------|----------|----------|----------|
| H             | -1.29881 | 4.112362 | 0.804502 | C             | 3.566178 | -3.11332 | 0.837278 |
| H             | -1.50162 | 0.915958 | -1.43104 | C             | -2.03587 | 1.497626 | 2.518595 |
| H             | -2.57441 | -0.21432 | 1.205084 | C             | 2.345518 | 2.992029 | -1.52793 |
| H             | -1.74225 | -1.46757 | -1.47462 | O             | 1.388522 | 3.546348 | 0.632677 |
| H             | 3.597481 | -1.84231 | -1.71783 | C             | -1.38353 | -3.6814  | -0.22597 |
| H             | 2.524846 | -0.44287 | -1.73223 | O             | -4.56277 | -0.43677 | -0.35904 |
| H             | 0.456849 | -0.5849  | -0.85613 | H             | -2.02277 | 0.971056 | -0.93258 |
| H             | -0.59541 | -3.29148 | -0.03143 | H             | -3.3794  | -0.61928 | 2.089473 |
| H             | -0.60537 | -2.12499 | 1.277077 | H             | -1.83898 | -1.20192 | 1.504759 |
| H             | -2.80999 | -3.49574 | -0.73508 | H             | -2.15675 | 3.512987 | -0.65343 |
| H             | -4.27002 | -3.65883 | 1.23263  | H             | -1.13035 | 3.396247 | 0.762794 |
| H             | -2.61908 | -3.30783 | 1.7588   | H             | -3.88326 | -2.13589 | 0.459152 |
| H             | -3.84534 | -2.02824 | 1.755663 | H             | -0.28005 | 2.389619 | -2.00582 |
| H             | -5.16599 | -2.76322 | -0.96926 | H             | -0.05844 | 4.050238 | -1.4631  |
| H             | -4.71799 | -1.09933 | -0.55866 | H             | 0.715544 | 1.051605 | 0.888983 |
| H             | -4.11534 | -1.83315 | -2.05284 | H             | 2.63161  | 0.375339 | -1.40688 |
| H             | 4.290897 | 2.97979  | -0.01361 | H             | 1.49269  | -1.20882 | 0.980143 |
| H             | 3.746345 | 2.252688 | -1.5209  | H             | -2.41215 | -0.75568 | -1.80966 |
| H             | 2.846071 | 3.604391 | -0.83161 | H             | -3.24225 | -2.29878 | -1.78398 |
| H             | -4.29588 | 1.967355 | 0.614768 | H             | -0.21355 | -0.74392 | -1.7021  |
| H             | -3.17293 | 1.822079 | 1.978123 | H             | 1.314736 | -3.16605 | -0.55647 |
| H             | -3.59541 | 3.426316 | 1.349313 | H             | 1.845021 | -2.17035 | -1.90488 |
| H             | -3.27532 | 2.69361  | -1.5466  | H             | 4.041938 | -1.63682 | -0.65034 |
| H             | 3.039019 | -3.17763 | 0.999424 | H             | 5.247578 | -1.04986 | 1.451357 |
| H             | 1.465915 | -3.89922 | 0.591133 | H             | 4.229226 | 0.303506 | 0.926164 |
| H             | 2.818617 | -3.95863 | -0.55651 | H             | 3.707402 | -0.72868 | 2.264913 |
| H             | 5.323809 | -0.93249 | 1.161153 | H             | 4.598003 | -3.37223 | 1.102477 |
| 07_1S4R10R_22 |          |          |          | H             | 2.954519 | -3.2274  | 1.742193 |
| C             | -2.19724 | 0.874753 | 1.149149 | H             | 3.224215 | -3.85053 | 0.104547 |
| C             | -1.89154 | 1.509225 | 0.003642 | H             | -3.01478 | 1.641966 | 2.996521 |
| C             | -2.69345 | -0.56438 | 1.233049 | H             | -1.46631 | 0.8286   | 3.17832  |
| C             | -1.36271 | 2.909587 | -0.18727 | H             | -1.52557 | 2.462545 | 2.500038 |
| C             | -3.43769 | -1.22086 | 0.051171 | H             | 3.339549 | 2.779596 | -1.11789 |
| C             | -0.13061 | 3.011999 | -1.11429 | H             | 2.230374 | 2.414563 | -2.45171 |
| C             | 1.24944  | 2.660182 | -0.5039  | H             | 2.298033 | 4.055823 | -1.7802  |
| C             | 1.320993 | 1.231191 | 0.002193 | H             | 2.213775 | 3.299747 | 1.081592 |
| C             | 2.027818 | 0.218189 | -0.51088 | H             | -1.99505 | -4.35836 | -0.8386  |
| C             | 2.040886 | -1.1957  | 0.026366 | H             | -0.41197 | -4.15677 | -0.07142 |
| C             | -2.5964  | -1.6373  | -1.18798 | H             | -1.87921 | -3.61934 | 0.752213 |
| C             | -1.27988 | -2.32552 | -0.8849  | H             | -4.23777 | 0.472338 | -0.4731  |
| C             | -0.12909 | -1.71414 | -1.21499 | 07_1S4R10R_23 |          |          |          |
| C             | 1.287353 | -2.14922 | -0.95492 | C             | -2.53865 | 1.252228 | 0.67726  |
| C             | 3.497595 | -1.67127 | 0.306776 | C             | -1.25535 | 1.645831 | 0.782661 |
| C             | 4.211954 | -0.72864 | 1.289389 | C             | -2.94144 | -0.11071 | 1.223705 |

|   |          |          |          |              |          |          |          |
|---|----------|----------|----------|--------------|----------|----------|----------|
| C | -0.6574  | 2.996462 | 0.478086 | H            | -3.31642 | 3.105468 | -0.17251 |
| C | -3.59691 | -1.13499 | 0.278586 | H            | 3.791451 | 2.524099 | -1.24128 |
| C | 0.404414 | 3.078057 | -0.64566 | H            | 2.502451 | 2.764659 | -2.43109 |
| C | 1.78379  | 2.416158 | -0.38689 | H            | 2.89497  | 4.062025 | -1.27932 |
| C | 1.722241 | 0.907647 | -0.54951 | H            | 3.06822  | 2.452172 | 1.085059 |
| C | 1.926235 | 0.003629 | 0.411895 | H            | -2.2146  | -4.16242 | -0.65381 |
| C | 1.831089 | -1.50358 | 0.289913 | H            | -0.53071 | -4.01914 | -0.11963 |
| C | -2.78137 | -1.46293 | -0.98826 | H            | -1.84564 | -3.46989 | 0.920455 |
| C | -1.44638 | -2.14563 | -0.75236 | H            | -5.30117 | -1.29716 | -0.66881 |
| C | -0.31482 | -1.52684 | -1.12748 | 07_1S4R10S_3 |          |          |          |
| C | 1.109272 | -2.00593 | -0.99046 | C            | -2.46809 | 1.653322 | 0.512082 |
| C | 3.210212 | -2.21146 | 0.486388 | C            | -1.17071 | 1.895238 | 0.769696 |
| C | 4.235263 | -1.8626  | -0.60285 | C            | -3.10361 | 0.367706 | 1.013471 |
| C | 3.796494 | -1.95084 | 1.883419 | C            | -0.35782 | 3.125875 | 0.45145  |
| C | -3.65885 | 2.119103 | 0.150202 | C            | -3.82993 | -0.486   | -0.03655 |
| C | 2.804768 | 2.977181 | -1.39926 | C            | 0.704844 | 2.974157 | -0.66803 |
| O | 2.173571 | 2.800955 | 0.938257 | C            | 2.060121 | 2.327519 | -0.28448 |
| C | -1.50187 | -3.51749 | -0.12142 | C            | 1.881645 | 0.934287 | 0.286234 |
| O | -4.89471 | -0.64091 | -0.08004 | C            | 2.09425  | -0.23572 | -0.32529 |
| H | -0.55042 | 0.925951 | 1.19137  | C            | 1.77253  | -1.58506 | 0.272941 |
| H | -3.65555 | 0.03891  | 2.048132 | C            | -2.91855 | -1.10297 | -1.12286 |
| H | -2.05896 | -0.59315 | 1.659076 | C            | -1.77739 | -2.00544 | -0.68141 |
| H | -1.44473 | 3.7128   | 0.219975 | C            | -0.50949 | -1.61829 | -0.90619 |
| H | -0.18839 | 3.377115 | 1.395079 | C            | 0.774043 | -2.35971 | -0.63739 |
| H | -3.7235  | -2.05941 | 0.865024 | C            | 3.036429 | -2.44245 | 0.591202 |
| H | -0.00384 | 2.668363 | -1.5782  | C            | 3.962267 | -2.66934 | -0.61537 |
| H | 0.591805 | 4.144353 | -0.82963 | C            | 3.825064 | -1.84675 | 1.766827 |
| H | 1.488406 | 0.586462 | -1.56339 | C            | -3.39821 | 2.616463 | -0.19002 |
| H | 2.146148 | 0.374289 | 1.413012 | C            | 2.997112 | 2.364107 | -1.5014  |
| H | 1.208526 | -1.83533 | 1.136279 | O            | 2.602374 | 3.180981 | 0.74945  |
| H | -2.63367 | -0.53528 | -1.5522  | C            | -2.17344 | -3.33468 | -0.08075 |
| H | -3.41063 | -2.12042 | -1.61199 | O            | -4.55364 | -1.47609 | 0.709177 |
| H | -0.43152 | -0.53821 | -1.56498 | H            | -0.63158 | 1.108438 | 1.292758 |
| H | 1.15064  | -3.10184 | -0.98137 | H            | -3.86176 | 0.618166 | 1.770933 |
| H | 1.671919 | -1.69055 | -1.8788  | H            | -2.35092 | -0.25355 | 1.511229 |
| H | 3.004152 | -3.29031 | 0.418023 | H            | -1.02    | 3.947541 | 0.159262 |
| H | 5.177873 | -2.39435 | -0.4267  | H            | 0.159624 | 3.46068  | 1.360104 |
| H | 3.883649 | -2.13845 | -1.60293 | H            | -4.55522 | 0.151461 | -0.56655 |
| H | 4.451832 | -0.78786 | -0.60937 | H            | 0.280305 | 2.413116 | -1.509   |
| H | 4.686934 | -2.56878 | 2.049114 | H            | 0.944101 | 3.979034 | -1.04065 |
| H | 4.09771  | -0.90374 | 2.007066 | H            | 1.502639 | 0.928156 | 1.308075 |
| H | 3.073085 | -2.18755 | 2.673417 | H            | 2.471285 | -0.24723 | -1.34855 |
| H | -4.16642 | 1.634012 | -0.68968 | H            | 1.262405 | -1.41236 | 1.231102 |
| H | -4.42897 | 2.262985 | 0.921015 | H            | -2.51457 | -0.27221 | -1.71437 |



|              |          |          |          |              |          |          |          |
|--------------|----------|----------|----------|--------------|----------|----------|----------|
| H            | -3.57542 | -1.6683  | -1.80557 | O            | 4.445967 | -1.69059 | -0.62355 |
| H            | -0.36826 | -0.63808 | -1.36096 | H            | 0.632811 | 1.014    | -1.30346 |
| H            | 0.585117 | -3.33875 | -0.18458 | H            | 3.852039 | 0.346184 | -1.84085 |
| H            | 1.265202 | -2.55691 | -1.60292 | H            | 2.297124 | -0.41989 | -1.51467 |
| H            | 2.661946 | -3.42692 | 0.909908 | H            | 1.184547 | 3.920112 | -0.44477 |
| H            | 4.775745 | -3.35308 | -0.34587 | H            | -0.08909 | 3.37874  | -1.51888 |
| H            | 3.434673 | -3.10835 | -1.46924 | H            | 4.517598 | 0.01836  | 0.538367 |
| H            | 4.421023 | -1.7307  | -0.94918 | H            | -0.05754 | 2.562728 | 1.424888 |
| H            | 4.682185 | -2.48008 | 2.025139 | H            | -0.67761 | 4.124916 | 0.8902   |
| H            | 4.206978 | -0.84899 | 1.51972  | H            | -1.50531 | 0.997137 | -1.22462 |
| H            | 3.196694 | -1.75113 | 2.660655 | H            | -2.49875 | -0.01641 | 1.491946 |
| H            | -2.94987 | 3.600251 | -0.34747 | H            | -1.55388 | -1.37537 | -1.11072 |
| H            | -3.70485 | 2.237838 | -1.17457 | H            | 2.454774 | -0.22653 | 1.69501  |
| H            | -4.32114 | 2.75547  | 0.389396 | H            | 3.438022 | -1.6689  | 1.884374 |
| H            | 3.973324 | 1.931807 | -1.25261 | H            | 0.289733 | -0.52291 | 1.392373 |
| H            | 2.586973 | 1.807116 | -2.3506  | H            | -0.7707  | -3.22497 | 0.336799 |
| H            | 3.148881 | 3.40185  | -1.81372 | H            | -1.39379 | -2.41235 | 1.762072 |
| H            | 3.417066 | 2.757975 | 1.066629 | H            | -3.74591 | -2.25023 | 0.830761 |
| H            | -2.79207 | -3.90501 | -0.7893  | H            | -5.28896 | -1.96655 | -1.10413 |
| H            | -1.31462 | -3.95693 | 0.181964 | H            | -4.48974 | -0.42924 | -0.72497 |
| H            | -2.78671 | -3.18881 | 0.814417 | H            | -3.95112 | -1.389   | -2.11061 |
| H            | -5.0255  | -2.03435 | 0.070416 | H            | -4.16244 | -4.11253 | -0.82913 |
| 07_1S4R10S_4 |          |          |          | H            | -2.66518 | -3.67614 | -1.66574 |
| C            | 2.524185 | 1.545475 | -0.65666 | H            | -2.61362 | -4.28772 | -0.00244 |
| C            | 1.226056 | 1.818896 | -0.87538 | H            | 3.119776 | 3.535281 | 0.013221 |
| C            | 3.085388 | 0.194869 | -1.06605 | H            | 3.858069 | 2.215615 | 0.920495 |
| C            | 0.47701  | 3.102979 | -0.61956 | H            | 4.422112 | 2.574656 | -0.7065  |
| C            | 3.765584 | -0.61811 | 0.045699 | H            | -3.77217 | 2.241129 | 1.447977 |
| C            | -0.51156 | 3.086251 | 0.575265 | H            | -2.31467 | 2.07997  | 2.444552 |
| C            | -1.91913 | 2.488485 | 0.325747 | H            | -2.82981 | 3.682173 | 1.883035 |
| C            | -1.85141 | 1.066113 | -0.19347 | H            | -3.34729 | 2.918486 | -0.95041 |
| C            | -2.14206 | -0.06246 | 0.460958 | H            | 2.535795 | -3.92737 | 0.980068 |
| C            | -1.96256 | -1.45673 | -0.09245 | H            | 1.079279 | -3.94212 | -0.02319 |
| C            | 2.816266 | -1.11392 | 1.161364 | H            | 2.604613 | -3.27949 | -0.65088 |
| C            | 1.630786 | -1.9822  | 0.769304 | H            | 4.876907 | -2.23201 | 0.057299 |
| C            | 0.382995 | -1.52841 | 0.984274 | 07_1S4R10S_5 |          |          |          |
| C            | -0.93029 | -2.23812 | 0.776116 | C            | -2.48772 | 1.634693 | 0.507849 |
| C            | -3.32539 | -2.20888 | -0.18665 | C            | -1.19271 | 1.87929  | 0.774675 |
| C            | -4.32177 | -1.45097 | -1.07863 | C            | -3.12433 | 0.343035 | 0.993491 |
| C            | -3.17616 | -3.65322 | -0.69395 | C            | -0.38389 | 3.115015 | 0.465461 |
| C            | 3.521907 | 2.523541 | -0.07889 | C            | -3.83114 | -0.51903 | -0.0719  |
| C            | -2.75791 | 2.626091 | 1.604973 | C            | 0.676966 | 2.976988 | -0.65753 |
| O            | -2.49776 | 3.321325 | -0.70665 | C            | 2.037928 | 2.340034 | -0.27904 |
| C            | 1.964519 | -3.35564 | 0.233676 | C            | 1.871875 | 0.944612 | 0.28999  |

|   |          |          |          |              |          |          |          |
|---|----------|----------|----------|--------------|----------|----------|----------|
| C | 2.09592  | -0.22209 | -0.3236  | H            | -2.77395 | -3.91893 | -0.71654 |
| C | 1.792164 | -1.5763  | 0.272471 | H            | -1.27096 | -3.95526 | 0.220535 |
| C | -2.90218 | -1.13819 | -1.13291 | H            | -2.73276 | -3.17835 | 0.869854 |
| C | -1.75412 | -2.02107 | -0.6666  | H            | -5.1533  | -1.18556 | 1.207387 |
| C | -0.48993 | -1.63185 | -0.90905 | 07_1S4R10S_6 |          |          |          |
| C | 0.79982  | -2.36114 | -0.63574 | C            | 2.530434 | 1.534846 | -0.64615 |
| C | 3.068012 | -2.41885 | 0.583248 | C            | 1.23663  | 1.812854 | -0.88371 |
| C | 3.994505 | -2.62505 | -0.62651 | C            | 3.096285 | 0.184015 | -1.05018 |
| C | 3.850952 | -1.82023 | 1.761181 | C            | 0.489513 | 3.098972 | -0.63175 |
| C | -3.41578 | 2.597068 | -0.19809 | C            | 3.76766  | -0.63874 | 0.067961 |
| C | 2.971395 | 2.386248 | -1.49828 | C            | -0.49742 | 3.089809 | 0.564432 |
| O | 2.576394 | 3.195731 | 0.755273 | C            | -1.90687 | 2.495964 | 0.318034 |
| C | -2.1368  | -3.33909 | -0.03407 | C            | -1.84424 | 1.071782 | -0.19643 |
| O | -4.55603 | -1.58608 | 0.555344 | C            | -2.14223 | -0.05307 | 0.461012 |
| H | -0.65326 | 1.092107 | 1.297029 | C            | -1.97058 | -1.44997 | -0.08779 |
| H | -3.8927  | 0.602795 | 1.742321 | C            | 2.811915 | -1.14146 | 1.166338 |
| H | -2.38048 | -0.27566 | 1.507371 | C            | 1.618695 | -1.99384 | 0.758371 |
| H | -1.0495  | 3.937003 | 0.182227 | C            | 0.375395 | -1.53523 | 0.989769 |
| H | 0.134058 | 3.443292 | 1.376147 | C            | -0.94384 | -2.23488 | 0.783888 |
| H | -4.54606 | 0.115385 | -0.61925 | C            | -3.3381  | -2.19388 | -0.18076 |
| H | 0.255061 | 2.415909 | -1.49972 | C            | -4.32923 | -1.43276 | -1.07585 |
| H | 0.906992 | 3.985311 | -1.02654 | C            | -3.19749 | -3.64077 | -0.68324 |
| H | 1.493673 | 0.933747 | 1.312202 | C            | 3.520808 | 2.506861 | -0.04598 |
| H | 2.471251 | -0.2272  | -1.3475  | C            | -2.74422 | 2.640941 | 1.597353 |
| H | 1.283737 | -1.41175 | 1.233026 | O            | -2.48353 | 3.327157 | -0.71701 |
| H | -2.49868 | -0.31055 | -1.72786 | C            | 1.937118 | -3.36166 | 0.200218 |
| H | -3.54936 | -1.72203 | -1.80449 | O            | 4.439853 | -1.77766 | -0.4876  |
| H | -0.35722 | -0.66116 | -1.38657 | H            | 0.647199 | 1.012418 | -1.32546 |
| H | 0.618698 | -3.33999 | -0.17947 | H            | 3.867841 | 0.353271 | -1.82099 |
| H | 1.293001 | -2.55809 | -1.60024 | H            | 2.316514 | -0.43031 | -1.51381 |
| H | 2.707446 | -3.41037 | 0.896073 | H            | 1.198948 | 3.915451 | -0.46142 |
| H | 4.816688 | -3.30102 | -0.36389 | H            | -0.07687 | 3.371772 | -1.53166 |
| H | 3.470694 | -3.06344 | -1.48299 | H            | 4.513478 | -0.00475 | 0.572942 |
| H | 4.441104 | -1.67817 | -0.95342 | H            | -0.04405 | 2.567485 | 1.415053 |
| H | 4.718424 | -2.4423  | 2.012268 | H            | -0.65929 | 4.130151 | 0.875955 |
| H | 4.216907 | -0.81491 | 1.52053  | H            | -1.49658 | 0.997664 | -1.22673 |
| H | 3.223877 | -1.74095 | 2.657534 | H            | -2.50043 | -0.00165 | 1.491201 |
| H | -2.96991 | 3.58308  | -0.34806 | H            | -1.56063 | -1.37417 | -1.10602 |
| H | -3.7125  | 2.220914 | -1.1865  | H            | 2.453524 | -0.2585  | 1.708029 |
| H | -4.3443  | 2.731361 | 0.373796 | H            | 3.431078 | -1.71434 | 1.872957 |
| H | 3.951551 | 1.961032 | -1.25285 | H            | 0.290972 | -0.53501 | 1.412938 |
| H | 2.563426 | 1.827748 | -2.34751 | H            | -0.79207 | -3.22467 | 0.348597 |
| H | 3.114366 | 3.425716 | -1.80901 | H            | -1.40851 | -2.40164 | 1.770535 |
| H | 3.395396 | 2.778426 | 1.068907 | H            | -3.7596  | -2.22939 | 0.836441 |

|              |          |          |          |              |          |          |          |
|--------------|----------|----------|----------|--------------|----------|----------|----------|
| H            | -5.2997  | -1.94221 | -1.09997 | H            | -0.05522 | 3.376037 | -1.56611 |
| H            | -4.49079 | -0.40872 | -0.72592 | H            | 4.507509 | -0.04313 | 0.594851 |
| H            | -3.95778 | -1.37684 | -2.10791 | H            | 0.000203 | 2.588194 | 1.38517  |
| H            | -4.18652 | -4.09411 | -0.81856 | H            | -0.62108 | 4.146351 | 0.839667 |
| H            | -2.68508 | -3.67012 | -1.65412 | H            | -1.4619  | 0.989286 | -1.22209 |
| H            | -2.64019 | -4.27663 | 0.011187 | H            | -2.49816 | 0.026668 | 1.496607 |
| H            | 3.119197 | 3.518778 | 0.045847 | H            | -1.5666  | -1.37841 | -1.08613 |
| H            | 3.83934  | 2.191863 | 0.956856 | H            | 2.453174 | -0.30802 | 1.725002 |
| H            | 4.431742 | 2.560896 | -0.658   | H            | 3.410309 | -1.78064 | 1.852221 |
| H            | -3.7598  | 2.258605 | 1.442596 | H            | 0.287653 | -0.57702 | 1.493533 |
| H            | -2.30197 | 2.096567 | 2.438559 | H            | -0.82949 | -3.23066 | 0.377126 |
| H            | -2.81253 | 3.698292 | 1.871467 | H            | -1.4395  | -2.3956  | 1.794896 |
| H            | -3.33444 | 2.925974 | -0.9587  | H            | -3.78489 | -2.18669 | 0.854737 |
| H            | 2.532444 | -3.93829 | 0.922239 | H            | -5.31536 | -1.88835 | -1.08699 |
| H            | 1.043802 | -3.9443  | -0.03737 | H            | -4.48332 | -0.36516 | -0.72177 |
| H            | 2.554048 | -3.27826 | -0.69965 | H            | -3.96252 | -1.35114 | -2.09576 |
| H            | 5.054636 | -1.44988 | -1.16365 | H            | -4.2359  | -4.05513 | -0.79041 |
| 07_1S4R10S_7 |          |          |          | H            | -2.72453 | -3.66037 | -1.62244 |
| C            | 2.535654 | 1.515913 | -0.62624 | H            | -2.69612 | -4.25647 | 0.046988 |
| C            | 1.258901 | 1.815732 | -0.92229 | H            | 3.101556 | 3.474998 | 0.147035 |
| C            | 3.108306 | 0.17093  | -1.03944 | H            | 3.767444 | 2.119715 | 1.057079 |
| C            | 0.516143 | 3.104664 | -0.66944 | H            | 4.442639 | 2.526214 | -0.51565 |
| C            | 3.763854 | -0.66806 | 0.075743 | H            | -3.71687 | 2.283534 | 1.444759 |
| C            | -0.46098 | 3.103759 | 0.534707 | H            | -2.25193 | 2.132012 | 2.43204  |
| C            | -1.87153 | 2.50702  | 0.304467 | H            | -2.76599 | 3.727424 | 1.850258 |
| C            | -1.81516 | 1.077196 | -0.19492 | H            | -3.30735 | 2.922401 | -0.96783 |
| C            | -2.13326 | -0.0381  | 0.469561 | H            | 2.50203  | -3.96049 | 0.770454 |
| C            | -1.98136 | -1.44129 | -0.06902 | H            | 0.985573 | -3.90968 | -0.14441 |
| C            | 2.798797 | -1.18172 | 1.160439 | H            | 2.479932 | -3.21805 | -0.81448 |
| C            | 1.59286  | -2.00661 | 0.734879 | H            | 5.058942 | -1.46974 | -1.15373 |
| C            | 0.357886 | -1.55568 | 1.019733 | 07_1S4R10S_8 |          |          |          |
| C            | -0.96948 | -2.23783 | 0.80959  | C            | -2.48171 | 1.652679 | 0.481924 |
| C            | -3.36007 | -2.16433 | -0.16145 | C            | -1.18574 | 1.908232 | 0.732931 |
| C            | -4.33706 | -1.39403 | -1.06419 | C            | -3.10625 | 0.366128 | 0.995528 |
| C            | -3.2404  | -3.61654 | -0.65397 | C            | -0.38611 | 3.138197 | 0.381586 |
| C            | 3.501689 | 2.463128 | 0.048262 | C            | -3.83111 | -0.50944 | -0.04688 |
| C            | -2.70003 | 2.666975 | 1.58784  | C            | 0.715795 | 2.955824 | -0.69431 |
| O            | -2.45522 | 3.326832 | -0.73604 | C            | 2.070116 | 2.3325   | -0.24713 |
| C            | 1.888823 | -3.34459 | 0.097779 | C            | 1.890048 | 0.931462 | 0.308601 |
| O            | 4.437312 | -1.80296 | -0.48663 | C            | 2.087931 | -0.22985 | -0.32174 |
| H            | 0.683973 | 1.036255 | -1.41834 | C            | 1.775348 | -1.58869 | 0.259462 |
| H            | 3.892146 | 0.351469 | -1.79543 | C            | -2.92108 | -1.13598 | -1.11995 |
| H            | 2.335553 | -0.43552 | -1.52489 | C            | -1.76825 | -2.01978 | -0.66757 |
| H            | 1.229784 | 3.919457 | -0.50682 | C            | -0.50623 | -1.63097 | -0.92199 |

|              |          |          |          |   |          |          |          |
|--------------|----------|----------|----------|---|----------|----------|----------|
| C            | 0.784859 | -2.36184 | -0.65999 | C | 2.539468 | 1.55359  | -0.60152 |
| C            | 3.047874 | -2.43762 | 0.567585 | C | 1.249836 | 1.860738 | -0.82497 |
| C            | 3.981187 | -2.62851 | -0.63938 | C | 3.080692 | 0.208191 | -1.05414 |
| C            | 3.824202 | -1.85538 | 1.758033 | C | 0.524183 | 3.145617 | -0.51369 |
| C            | -3.42179 | 2.596116 | -0.23366 | C | 3.764918 | -0.65123 | 0.028295 |
| C            | 3.053207 | 2.38508  | -1.42027 | C | -0.53242 | 3.074581 | 0.61926  |
| O            | 2.67382  | 3.167069 | 0.767048 | C | -1.93522 | 2.497226 | 0.272989 |
| C            | -2.14511 | -3.3389  | -0.03355 | C | -1.85625 | 1.064934 | -0.22244 |
| O            | -4.53887 | -1.57187 | 0.606181 | C | -2.13886 | -0.05226 | 0.452467 |
| H            | -0.63733 | 1.134972 | 1.266486 | C | -1.96051 | -1.45705 | -0.07366 |
| H            | -3.8613  | 0.633613 | 1.754975 | C | 2.829461 | -1.15847 | 1.142061 |
| H            | -2.35165 | -0.24511 | 1.502566 | C | 1.623027 | -2.00069 | 0.752358 |
| H            | -1.05278 | 3.931842 | 0.030011 | C | 0.386131 | -1.53403 | 1.001718 |
| H            | 0.079789 | 3.54055  | 1.294641 | C | -0.93878 | -2.22805 | 0.814936 |
| H            | -4.55911 | 0.116824 | -0.58618 | C | -3.32856 | -2.2011  | -0.16374 |
| H            | 0.312952 | 2.364439 | -1.52588 | C | -4.30845 | -1.45877 | -1.08668 |
| H            | 0.958626 | 3.949512 | -1.09276 | C | -3.18649 | -3.65978 | -0.63065 |
| H            | 1.514862 | 0.900014 | 1.333929 | C | 3.548637 | 2.485875 | 0.029659 |
| H            | 2.456911 | -0.22524 | -1.34788 | C | -2.84993 | 2.65622  | 1.490887 |
| H            | 1.263366 | -1.43237 | 1.219676 | O | -2.55177 | 3.313252 | -0.74959 |
| H            | -2.52515 | -0.31216 | -1.72527 | C | 1.924561 | -3.37081 | 0.190368 |
| H            | -3.58039 | -1.72139 | -1.7781  | O | 4.399766 | -1.78933 | -0.57039 |
| H            | -0.37694 | -0.65967 | -1.3995  | H | 0.646272 | 1.088393 | -1.29663 |
| H            | 0.605108 | -3.34747 | -0.21813 | H | 3.839002 | 0.389434 | -1.83516 |
| H            | 1.278354 | -2.54377 | -1.6272  | H | 2.284922 | -0.38487 | -1.51834 |
| H            | 2.683621 | -3.43265 | 0.864759 | H | 1.241685 | 3.924511 | -0.23747 |
| H            | 4.800648 | -3.30951 | -0.38128 | H | 0.035977 | 3.517294 | -1.42804 |
| H            | 3.461644 | -3.05403 | -1.50502 | H | 4.536053 | -0.04221 | 0.525783 |
| H            | 4.431078 | -1.67773 | -0.94977 | H | -0.11668 | 2.509781 | 1.462907 |
| H            | 4.690622 | -2.48078 | 2.004513 | H | -0.70852 | 4.098725 | 0.973062 |
| H            | 4.190368 | -0.84646 | 1.534195 | H | -1.5013  | 0.964224 | -1.25039 |
| H            | 3.192296 | -1.79044 | 2.652294 | H | -2.50033 | 0.014172 | 1.480533 |
| H            | -2.98814 | 3.584976 | -0.39935 | H | -1.54477 | -1.39712 | -1.09072 |
| H            | -3.71896 | 2.202694 | -1.21505 | H | 2.48879  | -0.27844 | 1.699763 |
| H            | -4.34871 | 2.728469 | 0.340953 | H | 3.459452 | -1.74214 | 1.829938 |
| H            | 4.012366 | 1.943277 | -1.13462 | H | 0.312954 | -0.53234 | 1.423965 |
| H            | 2.663862 | 1.848889 | -2.29093 | H | -0.79458 | -3.22898 | 0.403418 |
| H            | 3.222903 | 3.427238 | -1.7084  | H | -1.40254 | -2.36795 | 1.806034 |
| H            | 2.16621  | 3.053072 | 1.58647  | H | -3.76049 | -2.21205 | 0.849595 |
| H            | -2.7967  | -3.91311 | -0.70701 | H | -5.28141 | -1.96378 | -1.10438 |
| H            | -1.27752 | -3.95971 | 0.202972 | H | -4.46668 | -0.42441 | -0.76748 |
| H            | -2.72391 | -3.17963 | 0.881699 | H | -3.92889 | -1.43429 | -2.11711 |
| H            | -5.1298  | -1.16639 | 1.260881 | H | -4.17547 | -4.11259 | -0.76804 |
| 07_1S4R10S_9 |          |          |          | H | -2.66204 | -3.71364 | -1.59405 |

|               |          |          |          |               |          |          |          |
|---------------|----------|----------|----------|---------------|----------|----------|----------|
| H             | -2.6406  | -4.28145 | 0.085424 | H             | 2.457739 | -0.2252  | -1.34769 |
| H             | 3.170187 | 3.503368 | 0.151921 | H             | 1.264306 | -1.43147 | 1.220329 |
| H             | 3.858885 | 2.133041 | 1.022319 | H             | -2.52405 | -0.31191 | -1.72531 |
| H             | 4.460915 | 2.538527 | -0.58018 | H             | -3.57898 | -1.72131 | -1.77942 |
| H             | -3.84423 | 2.253113 | 1.277053 | H             | -0.37602 | -0.65937 | -1.39863 |
| H             | -2.4419  | 2.141415 | 2.365948 | H             | 0.60574  | -3.34702 | -0.21664 |
| H             | -2.95146 | 3.718248 | 1.735213 | H             | 1.279051 | -2.54407 | -1.6261  |
| H             | -2.10125 | 3.128727 | -1.58923 | H             | 2.684583 | -3.43183 | 0.865952 |
| H             | 2.528651 | -3.95016 | 0.902869 | H             | 4.801394 | -3.30911 | -0.38046 |
| H             | 1.02471  | -3.94901 | -0.03273 | H             | 3.462231 | -3.05413 | -1.50411 |
| H             | 2.527031 | -3.28996 | -0.71935 | H             | 4.431691 | -1.67758 | -0.94956 |
| H             | 5.010938 | -1.4575  | -1.24772 | H             | 4.691726 | -2.47951 | 2.005007 |
| 07_1S4R10S_10 |          |          |          | H             | 4.191447 | -0.84537 | 1.534087 |
| C             | -2.48246 | 1.651957 | 0.482963 | H             | 3.193528 | -1.78885 | 2.652744 |
| C             | -1.1862  | 1.90676  | 0.733232 | H             | -2.98866 | 3.585118 | -0.39661 |
| C             | -3.10703 | 0.364979 | 0.995472 | H             | -3.7218  | 2.203811 | -1.21185 |
| C             | -0.38651 | 3.137013 | 0.382964 | H             | -4.34879 | 2.729321 | 0.345362 |
| C             | -3.83115 | -0.51007 | -0.04791 | H             | 4.01095  | 1.943975 | -1.13754 |
| C             | 0.714615 | 2.955865 | -0.69394 | H             | 2.661265 | 1.848822 | -2.29242 |
| C             | 2.069526 | 2.332912 | -0.24817 | H             | 3.220467 | 3.427505 | -1.71099 |
| C             | 1.890129 | 0.932061 | 0.308155 | H             | 2.167445 | 3.053949 | 1.585159 |
| C             | 2.08857  | -0.22946 | -0.32163 | H             | -2.79531 | -3.91348 | -0.70831 |
| C             | 1.77617  | -1.58813 | 0.260105 | H             | -1.27707 | -3.95958 | 0.203258 |
| C             | -2.92024 | -1.13603 | -1.12057 | H             | -2.72443 | -3.18002 | 0.880508 |
| C             | -1.76756 | -2.01978 | -0.66771 | H             | -5.13121 | -1.16769 | 1.258157 |
| C             | -0.50545 | -1.63078 | -0.92136 | 07_1S4R10S_11 |          |          |          |
| C             | 0.78557  | -2.36162 | -0.65897 | C             | -0.72292 | -2.84288 | -0.10772 |
| C             | 3.048739 | -2.43689 | 0.568324 | C             | 0.4242   | -2.41344 | -0.66284 |
| C             | 3.981873 | -2.62824 | -0.63871 | C             | -2.0332  | -2.18854 | -0.50168 |
| C             | 3.825284 | -1.85418 | 1.758408 | C             | 1.824183 | -2.91525 | -0.41986 |
| C             | -3.42284 | 2.596523 | -0.23072 | C             | -2.66024 | -1.30994 | 0.602439 |
| C             | 3.051358 | 2.385397 | -1.42233 | C             | 2.738523 | -2.01928 | 0.449045 |
| O             | 2.674151 | 3.167882 | 0.765173 | C             | 3.122481 | -0.62208 | -0.11868 |
| C             | -2.14462 | -3.33905 | -0.03415 | C             | 2.044637 | 0.425146 | 0.131078 |
| O             | -4.53939 | -1.57286 | 0.604069 | C             | 1.687326 | 1.381348 | -0.73276 |
| H             | -0.63764 | 1.132584 | 1.265293 | C             | 0.68283  | 2.505036 | -0.53638 |
| H             | -3.86249 | 0.631846 | 1.754724 | C             | -3.51023 | -0.16244 | 0.036406 |
| H             | -2.35258 | -0.24646 | 1.502484 | C             | -2.7936  | 0.998925 | -0.63455 |
| H             | -1.05327 | 3.9313   | 0.033029 | C             | -1.45422 | 1.088911 | -0.70624 |
| H             | 0.080049 | 3.537932 | 1.296321 | C             | -0.62365 | 2.182454 | -1.32913 |
| H             | -4.55876 | 0.116448 | -0.58743 | C             | 0.437403 | 2.922379 | 0.938056 |
| H             | 0.311389 | 2.3648   | -1.52555 | C             | 1.721859 | 3.470888 | 1.583746 |
| H             | 0.956716 | 3.949882 | -1.09201 | C             | -0.68149 | 3.969925 | 1.065892 |
| H             | 1.514679 | 0.900945 | 1.333402 | C             | -0.82554 | -3.94569 | 0.917802 |

|               |          |          |          |   |          |          |          |
|---------------|----------|----------|----------|---|----------|----------|----------|
| C             | 4.416975 | -0.15068 | 0.569026 | C | 0.413686 | 3.171958 | -0.51095 |
| O             | 3.463903 | -0.71627 | -1.51001 | C | 1.825838 | 2.63705  | -0.16408 |
| C             | -3.74569 | 2.024202 | -1.20782 | C | 1.781968 | 1.21469  | 0.357531 |
| O             | -3.4773  | -2.17664 | 1.40611  | C | 2.129755 | 0.094511 | -0.28348 |
| H             | 0.34229  | -1.60594 | -1.39132 | C | 1.970877 | -1.29688 | 0.28483  |
| H             | -2.78414 | -2.94917 | -0.75929 | C | -2.69965 | -1.29381 | -1.20058 |
| H             | -1.87784 | -1.57528 | -1.39411 | C | -1.4812  | -2.07052 | -0.72769 |
| H             | 1.799052 | -3.90251 | 0.053615 | C | -0.25517 | -1.56762 | -0.95532 |
| H             | 2.322674 | -3.06452 | -1.38803 | C | 1.094116 | -2.17073 | -0.6597  |
| H             | -1.86116 | -0.88881 | 1.230032 | C | 3.350381 | -1.94425 | 0.627662 |
| H             | 2.285137 | -1.88398 | 1.439562 | C | 3.194762 | -3.24007 | 1.440032 |
| H             | 3.67187  | -2.57578 | 0.60404  | C | 4.258481 | -2.17294 | -0.59168 |
| H             | 1.619045 | 0.401191 | 1.133704 | C | -3.56245 | 2.339233 | -0.24616 |
| H             | 2.154631 | 1.366533 | -1.71869 | C | 2.741211 | 2.803429 | -1.38643 |
| H             | 1.113917 | 3.385266 | -1.04016 | O | 2.300065 | 3.497623 | 0.897704 |
| H             | -4.1155  | 0.247418 | 0.862179 | C | -1.75122 | -3.41783 | -0.09873 |
| H             | -4.24377 | -0.59084 | -0.66451 | O | -4.35993 | -1.85725 | 0.556609 |
| H             | -0.86099 | 0.280375 | -0.28666 | H | -0.76192 | 1.108688 | 1.41612  |
| H             | -0.32063 | 1.879663 | -2.34381 | H | -3.92032 | 0.26506  | 1.682505 |
| H             | -1.2022  | 3.102008 | -1.45588 | H | -2.32034 | -0.4448  | 1.46799  |
| H             | 0.119072 | 2.034038 | 1.501996 | H | -0.169   | 3.49333  | 1.541618 |
| H             | 1.55095  | 3.717878 | 2.638365 | H | -1.39288 | 3.928637 | 0.366281 |
| H             | 2.5481   | 2.756898 | 1.531525 | H | -4.47005 | -0.21312 | -0.69248 |
| H             | 2.04258  | 4.390825 | 1.076961 | H | 0.038763 | 2.618944 | -1.38012 |
| H             | -0.77359 | 4.302154 | 2.106753 | H | 0.554709 | 4.213486 | -0.82892 |
| H             | -0.4635  | 4.856805 | 0.45584  | H | 1.393196 | 1.137376 | 1.372922 |
| H             | -1.65399 | 3.575226 | 0.757551 | H | 2.518351 | 0.153743 | -1.30055 |
| H             | -1.35613 | -3.59192 | 1.809318 | H | 1.428411 | -1.20453 | 1.236434 |
| H             | -1.42223 | -4.78022 | 0.523276 | H | -2.36993 | -0.42231 | -1.77919 |
| H             | 0.145919 | -4.34001 | 1.225665 | H | -3.27144 | -1.92372 | -1.90337 |
| H             | 4.709091 | 0.832232 | 0.187419 | H | -0.20724 | -0.58942 | -1.43343 |
| H             | 4.277168 | -0.07685 | 1.6528   | H | 0.994571 | -3.17235 | -0.23248 |
| H             | 5.227091 | -0.86163 | 0.371773 | H | 1.630295 | -2.29407 | -1.61315 |
| H             | 2.641804 | -0.87991 | -2.00016 | H | 3.856209 | -1.21507 | 1.277336 |
| H             | -4.45397 | 2.371905 | -0.44336 | H | 4.170094 | -3.58378 | 1.804673 |
| H             | -3.23919 | 2.898991 | -1.62173 | H | 2.545423 | -3.09015 | 2.311253 |
| H             | -4.35112 | 1.580545 | -2.01065 | H | 2.768095 | -4.0519  | 0.83912  |
| H             | -3.78112 | -1.6633  | 2.172159 | H | 5.23795  | -2.5465  | -0.27017 |
| 07_1S4R10S_12 |          |          |          | H | 3.836923 | -2.91569 | -1.27962 |
| C             | -2.58703 | 1.466002 | 0.50935  | H | 4.427534 | -1.24949 | -1.15656 |
| C             | -1.34526 | 1.841994 | 0.86284  | H | -3.20427 | 3.364079 | -0.36953 |
| C             | -3.1114  | 0.110823 | 0.951928 | H | -3.76564 | 1.94365  | -1.25049 |
| C             | -0.65321 | 3.159953 | 0.61469  | H | -4.53023 | 2.379519 | 0.272422 |
| C             | -3.70701 | -0.78664 | -0.14268 | H | 3.755802 | 2.45446  | -1.16164 |

|               |          |          |          |               |          |          |          |
|---------------|----------|----------|----------|---------------|----------|----------|----------|
| H             | 2.373998 | 2.240704 | -2.25134 | H             | 0.991217 | -3.17624 | -0.27864 |
| H             | 2.793228 | 3.860994 | -1.66318 | H             | 1.613205 | -2.26605 | -1.6443  |
| H             | 3.152555 | 3.137883 | 1.19309  | H             | 3.853803 | -1.24304 | 1.254316 |
| H             | -2.28485 | -4.06946 | -0.80645 | H             | 4.15832  | -3.61696 | 1.763845 |
| H             | -0.8388  | -3.93671 | 0.204701 | H             | 2.539913 | -3.1175  | 2.284331 |
| H             | -2.40352 | -3.31435 | 0.774133 | H             | 2.747513 | -4.07133 | 0.804772 |
| H             | -4.73159 | -2.45628 | -0.11075 | H             | 5.220734 | -2.56889 | -0.3092  |
| 07_1S4R10S_13 |          |          |          | H             | 3.812436 | -2.92843 | -1.31224 |
| C             | -2.59867 | 1.487332 | 0.45825  | H             | 4.409426 | -1.2646  | -1.18352 |
| C             | -1.35261 | 1.883768 | 0.7716   | H             | -3.26451 | 3.352532 | -0.46038 |
| C             | -3.0993  | 0.141121 | 0.952519 | H             | -3.81874 | 1.897851 | -1.28904 |
| C             | -0.67721 | 3.196199 | 0.460922 | H             | -4.55851 | 2.36505  | 0.236817 |
| C             | -3.71023 | -0.79183 | -0.10341 | H             | 3.858284 | 2.460823 | -0.94221 |
| C             | 0.470247 | 3.148585 | -0.58058 | H             | 2.56081  | 2.29552  | -2.14774 |
| C             | 1.861763 | 2.636412 | -0.10839 | H             | 2.955434 | 3.891681 | -1.48457 |
| C             | 1.801324 | 1.203417 | 0.38872  | H             | 1.836845 | 3.285416 | 1.754891 |
| C             | 2.129541 | 0.091378 | -0.27433 | H             | -2.28136 | -4.08014 | -0.78689 |
| C             | 1.962736 | -1.30823 | 0.271378 | H             | -0.82686 | -3.93549 | 0.210653 |
| C             | -2.72255 | -1.30818 | -1.17537 | H             | -2.38976 | -3.32159 | 0.79347  |
| C             | -1.4917  | -2.07467 | -0.7181  | H             | -4.71238 | -2.47274 | -0.0005  |
| C             | -0.27144 | -1.56428 | -0.96018 | 07_1S4R10S_14 |          |          |          |
| C             | 1.083107 | -2.16517 | -0.68494 | C             | -2.59455 | 1.452104 | 0.503737 |
| C             | 3.340651 | -1.96529 | 0.602966 | C             | -1.35574 | 1.82953  | 0.86578  |
| C             | 3.182566 | -3.26551 | 1.407796 | C             | -3.1199  | 0.093176 | 0.935542 |
| C             | 4.24058  | -2.19064 | -0.62297 | C             | -0.66694 | 3.150592 | 0.624652 |
| C             | -3.60149 | 2.325579 | -0.30111 | C             | -3.70667 | -0.80912 | -0.16827 |
| C             | 2.872535 | 2.82718  | -1.24364 | C             | 0.397823 | 3.173225 | -0.50272 |
| O             | 2.351926 | 3.482627 | 0.956243 | C             | 1.812799 | 2.64445  | -0.15884 |
| C             | -1.74547 | -3.42352 | -0.08549 | C             | 1.775621 | 1.220737 | 0.359145 |
| O             | -4.32753 | -1.85335 | 0.640318 | C             | 2.13073  | 0.104031 | -0.2838  |
| H             | -0.75114 | 1.17365  | 1.335159 | C             | 1.978899 | -1.28927 | 0.281296 |
| H             | -3.89308 | 0.309346 | 1.696252 | C             | -2.69156 | -1.31844 | -1.20865 |
| H             | -2.29205 | -0.39337 | 1.465793 | C             | -1.46772 | -2.07883 | -0.7195  |
| H             | -1.41312 | 3.91994  | 0.096707 | C             | -0.24545 | -1.57282 | -0.96146 |
| H             | -0.28521 | 3.631172 | 1.393467 | C             | 1.108646 | -2.16605 | -0.66632 |
| H             | -4.49651 | -0.24331 | -0.64594 | C             | 3.361784 | -1.92894 | 0.625289 |
| H             | 0.149636 | 2.550345 | -1.44249 | C             | 3.212558 | -3.22732 | 1.434756 |
| H             | 0.632285 | 4.172849 | -0.94116 | C             | 4.273287 | -2.1498  | -0.59297 |
| H             | 1.409654 | 1.095829 | 1.402707 | C             | -3.56657 | 2.324501 | -0.25717 |
| H             | 2.518131 | 0.166001 | -1.29039 | C             | 2.726129 | 2.818669 | -1.38152 |
| H             | 1.421772 | -1.22862 | 1.225153 | O             | 2.283772 | 3.50448  | 0.905025 |
| H             | -2.40892 | -0.44222 | -1.77103 | C             | -1.72423 | -3.41763 | -0.06775 |
| H             | -3.30533 | -1.9493  | -1.85857 | O             | -4.34537 | -1.9531  | 0.416103 |
| H             | -0.23347 | -0.58438 | -1.43594 | H             | -0.77375 | 1.096254 | 1.420582 |

|               |          |          |          |   |          |          |          |
|---------------|----------|----------|----------|---|----------|----------|----------|
| H             | -3.93273 | 0.259913 | 1.663871 | C | -2.84141 | 1.532016 | -0.97364 |
| H             | -2.33558 | -0.46262 | 1.461444 | C | -1.68055 | 2.010989 | -0.12248 |
| H             | -1.40929 | 3.918863 | 0.383079 | C | -0.45659 | 1.484032 | -0.27969 |
| H             | -0.18203 | 3.478865 | 1.55296  | C | 0.812627 | 1.868781 | 0.446403 |
| H             | -4.46218 | -0.23564 | -0.72816 | C | 3.37395  | 2.132015 | 0.299027 |
| H             | 0.024866 | 2.621505 | -1.37351 | C | 4.663883 | 1.669156 | -0.3999  |
| H             | 0.532671 | 4.216778 | -0.81663 | C | 3.338412 | 3.670197 | 0.319764 |
| H             | 1.385464 | 1.138754 | 1.373665 | C | -2.41551 | -1.15414 | 1.873205 |
| H             | 2.521004 | 0.167713 | -1.29993 | C | 2.47989  | -3.11144 | 1.185111 |
| H             | 1.434397 | -1.20194 | 1.232285 | O | 2.931354 | -2.65525 | -1.1489  |
| H             | -2.36302 | -0.44968 | -1.79087 | C | -2.003   | 3.126822 | 0.845033 |
| H             | -3.25885 | -1.96247 | -1.89743 | O | -5.16053 | 1.026247 | -0.87256 |
| H             | -0.20457 | -0.60108 | -1.45352 | H | -1.88418 | -2.40771 | -1.34085 |
| H             | 1.016552 | -3.16962 | -0.24209 | H | -3.69179 | -1.10329 | -1.38002 |
| H             | 1.646193 | -2.2828  | -1.61977 | H | -4.61258 | -1.28518 | 0.110864 |
| H             | 3.862246 | -1.19806 | 1.277279 | H | -0.30557 | -2.84554 | 1.279361 |
| H             | 4.189415 | -3.5664  | 1.799683 | H | -0.94962 | -4.15666 | 0.331163 |
| H             | 2.561489 | -3.08279 | 2.305623 | H | -3.95778 | 1.008017 | 0.817612 |
| H             | 2.790892 | -4.04015 | 0.831726 | H | 0.995347 | -4.20634 | -0.82137 |
| H             | 5.254467 | -2.51811 | -0.27058 | H | 0.47731  | -2.73402 | -1.62525 |
| H             | 3.85727  | -2.89364 | -1.28306 | H | 1.060173 | -0.75049 | 0.978012 |
| H             | 4.437777 | -1.22425 | -1.15576 | H | 2.884451 | -0.25186 | -1.42055 |
| H             | -3.2092  | 3.349992 | -0.37703 | H | 1.995209 | 1.979356 | -1.34498 |
| H             | -3.76223 | 1.929632 | -1.26317 | H | -3.36714 | 2.408405 | -1.37734 |
| H             | -4.53819 | 2.363683 | 0.25465  | H | -2.47084 | 0.959994 | -1.83249 |
| H             | 3.742632 | 2.47402  | -1.15875 | H | -0.35009 | 0.679239 | -1.00444 |
| H             | 2.36071  | 2.256616 | -2.2476  | H | 0.805205 | 2.941798 | 0.657023 |
| H             | 2.772722 | 3.877268 | -1.65533 | H | 0.862875 | 1.378174 | 1.431306 |
| H             | 3.138387 | 3.148088 | 1.198347 | H | 3.410258 | 1.773349 | 1.339258 |
| H             | -2.28009 | -4.07497 | -0.75116 | H | 5.537778 | 2.155005 | 0.049343 |
| H             | -0.80407 | -3.93261 | 0.219074 | H | 4.809565 | 0.587555 | -0.32264 |
| H             | -2.35559 | -3.30359 | 0.818826 | H | 4.65099  | 1.931884 | -1.46619 |
| H             | -4.99882 | -1.62541 | 1.054967 | H | 4.266425 | 4.067194 | 0.747824 |
| 07_1S4R10S_15 |          |          |          | H | 3.245743 | 4.070977 | -0.69833 |
| C             | -2.51268 | -1.44358 | 0.393823 | H | 2.510873 | 4.070086 | 0.913297 |
| C             | -1.6895  | -2.26867 | -0.27534 | H | -1.63954 | -1.73953 | 2.37159  |
| C             | -3.70348 | -0.82808 | -0.31841 | H | -2.19797 | -0.09355 | 2.05192  |
| C             | -0.56679 | -3.12799 | 0.255376 | H | -3.36883 | -1.37045 | 2.375288 |
| C             | -3.91275 | 0.699831 | -0.23782 | H | 3.422529 | -2.64619 | 1.49848  |
| C             | 0.70033  | -3.16558 | -0.64262 | H | 1.773727 | -3.00683 | 2.015555 |
| C             | 1.962981 | -2.44808 | -0.10655 | H | 2.659135 | -4.17811 | 1.012231 |
| C             | 1.717812 | -0.96957 | 0.138845 | H | 3.767032 | -2.26421 | -0.84393 |
| C             | 2.252501 | 0.023961 | -0.57833 | H | -2.81165 | 2.842285 | 1.531256 |
| C             | 2.089804 | 1.516215 | -0.34873 | H | -1.14546 | 3.421477 | 1.454908 |



|               |          |          |          |               |          |          |          |
|---------------|----------|----------|----------|---------------|----------|----------|----------|
| H             | -2.35874 | 4.016174 | 0.305597 | H             | 4.668662 | -1.64795 | 1.771517 |
| H             | -5.84919 | 0.479748 | -0.46036 | H             | 4.705579 | -3.6414  | -0.51779 |
| 07_1S4R10S_16 |          |          |          | H             | 3.519032 | -3.8447  | 0.779401 |
| C             | -2.77817 | 1.328766 | -0.20525 | H             | 2.995349 | -3.81458 | -0.91367 |
| C             | -1.46684 | 1.59477  | -0.3305  | H             | -3.24529 | 3.000075 | 1.11317  |
| C             | -3.38372 | 0.172803 | -0.98495 | H             | -4.57727 | 2.490683 | 0.055289 |
| C             | -0.66015 | 2.69206  | 0.322932 | H             | -4.15484 | 1.510683 | 1.444829 |
| C             | -3.85632 | -1.0571  | -0.18403 | H             | 3.95039  | 2.688634 | -0.95461 |
| C             | 0.528932 | 3.173483 | -0.54015 | H             | 2.739475 | 2.813695 | -2.24045 |
| C             | 1.89598  | 2.513167 | -0.23709 | H             | 2.987912 | 4.175416 | -1.12307 |
| C             | 1.866907 | 0.99939  | -0.37804 | H             | 3.08348  | 2.535656 | 1.318517 |
| C             | 2.105999 | 0.125061 | 0.605197 | H             | -2.29385 | -3.0762  | -1.78706 |
| C             | 2.171504 | -1.3928  | 0.469916 | H             | -0.79919 | -3.81093 | -1.20395 |
| C             | -2.78934 | -1.67149 | 0.74743  | H             | -2.34103 | -4.15861 | -0.40056 |
| C             | -1.54737 | -2.19966 | 0.054692 | H             | -5.29342 | -1.44471 | 1.086153 |
| C             | -0.35822 | -1.62055 | 0.284248 | 07_1S4R10S_17 |          |          |          |
| C             | 0.978258 | -1.96428 | -0.33389 | C             | -2.61525 | 1.463395 | 0.454344 |
| C             | 3.554018 | -1.84284 | -0.09785 | C             | -1.37372 | 1.866736 | 0.776443 |
| C             | 4.714953 | -1.27852 | 0.738245 | C             | -3.11029 | 0.109537 | 0.935075 |
| C             | 3.692656 | -3.3715  | -0.19626 | C             | -0.70646 | 3.185016 | 0.472906 |
| C             | -3.72629 | 2.133343 | 0.651891 | C             | -3.70653 | -0.82912 | -0.13301 |
| C             | 2.957014 | 3.083257 | -1.20078 | C             | 0.43886  | 3.151278 | -0.57145 |
| O             | 2.214596 | 2.913605 | 1.10449  | C             | 1.835701 | 2.650317 | -0.10363 |
| C             | -1.74597 | -3.36965 | -0.88073 | C             | 1.788449 | 1.215668 | 0.389241 |
| O             | -5.01093 | -0.6701  | 0.573566 | C             | 2.132416 | 0.108958 | -0.27472 |
| H             | -0.88985 | 0.933363 | -0.97522 | C             | 1.978446 | -1.2934  | 0.267205 |
| H             | -4.25823 | 0.52848  | -1.54952 | C             | -2.70517 | -1.34361 | -1.18418 |
| H             | -2.6554  | -0.18408 | -1.72216 | C             | -1.46628 | -2.08756 | -0.70756 |
| H             | -1.30294 | 3.550438 | 0.548708 | C             | -0.25189 | -1.57199 | -0.96892 |
| H             | -0.26521 | 2.355978 | 1.291832 | C             | 1.109693 | -2.15709 | -0.69282 |
| H             | -4.15828 | -1.81583 | -0.92422 | C             | 3.362391 | -1.93694 | 0.600734 |
| H             | 0.30039  | 3.033882 | -1.60416 | C             | 3.215617 | -3.24043 | 1.402413 |
| H             | 0.676305 | 4.249939 | -0.39173 | C             | 4.267295 | -2.15076 | -0.62362 |
| H             | 1.669869 | 0.644856 | -1.39078 | C             | -3.61896 | 2.297229 | -0.30881 |
| H             | 2.291286 | 0.5234   | 1.601579 | C             | 2.842322 | 2.85405  | -1.24024 |
| H             | 2.100477 | -1.80868 | 1.48673  | O             | 2.319781 | 3.498115 | 0.962803 |
| H             | -3.27799 | -2.49722 | 1.291999 | C             | -1.70095 | -3.42489 | -0.04453 |
| H             | -2.51263 | -0.9176  | 1.49237  | O             | -4.31137 | -1.96872 | 0.493743 |
| H             | -0.34457 | -0.77403 | 0.967537 | H             | -0.77044 | 1.158702 | 1.34077  |
| H             | 1.08381  | -3.05099 | -0.41653 | H             | -3.90956 | 0.283822 | 1.676225 |
| H             | 1.029797 | -1.58495 | -1.36668 | H             | -2.30688 | -0.42171 | 1.457538 |
| H             | 3.636462 | -1.42478 | -1.11291 | H             | -1.4476  | 3.906541 | 0.115023 |
| H             | 5.679643 | -1.58774 | 0.319322 | H             | -0.31519 | 3.615918 | 1.407525 |
| H             | 4.699677 | -0.18455 | 0.771492 | H             | -4.48462 | -0.28234 | -0.68862 |

|               |          |          |          |               |          |          |          |
|---------------|----------|----------|----------|---------------|----------|----------|----------|
| H             | 0.121635 | 2.553056 | -1.43456 | C             | -4.25536 | -1.54858 | -1.00718 |
| H             | 0.590602 | 4.178214 | -0.92884 | C             | -3.12906 | -3.72136 | -0.45054 |
| H             | 1.392676 | 1.100712 | 1.400867 | C             | 3.614898 | 2.648597 | -0.10286 |
| H             | 2.52539  | 0.190224 | -1.28853 | C             | -2.39977 | 2.676671 | 1.538398 |
| H             | 1.434458 | -1.2214  | 1.219939 | O             | -3.14039 | 3.022808 | -0.74507 |
| H             | -2.39496 | -0.47942 | -1.78306 | C             | 1.979212 | -3.32286 | 0.025376 |
| H             | -3.27779 | -2.00176 | -1.8549  | O             | 4.400162 | -1.60104 | -0.89485 |
| H             | -0.22468 | -0.60142 | -1.46441 | H             | 0.578319 | 1.008032 | -0.55449 |
| H             | 1.029239 | -3.17018 | -0.28921 | H             | 3.725107 | 0.540845 | -1.88006 |
| H             | 1.642125 | -2.2495  | -1.65163 | H             | 2.192767 | -0.23055 | -1.46652 |
| H             | 3.866863 | -1.21091 | 1.254718 | H             | 0.37381  | 2.916261 | 1.372449 |
| H             | 4.194225 | -3.5836  | 1.75872  | H             | 1.141156 | 3.931452 | 0.178814 |
| H             | 2.570634 | -3.10039 | 2.278565 | H             | 4.594018 | -0.00531 | 0.407873 |
| H             | 2.788598 | -4.04878 | 0.79709  | H             | -1.12591 | 4.369058 | -0.17823 |
| H             | 5.250651 | -2.51939 | -0.3084  | H             | -0.74776 | 3.237066 | -1.46617 |
| H             | 3.848295 | -2.89167 | -1.31512 | H             | -1.67261 | 0.879039 | -1.3986  |
| H             | 4.427889 | -1.22208 | -1.18226 | H             | -2.28696 | 0.050998 | 1.489503 |
| H             | -3.28826 | 3.327148 | -0.4616  | H             | -1.49144 | -1.48328 | -1.0615  |
| H             | -3.82601 | 1.871908 | -1.29986 | H             | 2.618857 | -0.3286  | 1.693003 |
| H             | -4.58036 | 2.328671 | 0.22215  | H             | 3.592869 | -1.79062 | 1.685145 |
| H             | 3.83173  | 2.494532 | -0.94263 | H             | 0.421236 | -0.57728 | 1.512933 |
| H             | 2.532884 | 2.324041 | -2.14611 | H             | -0.71219 | -3.25398 | 0.474471 |
| H             | 2.915976 | 3.920292 | -1.47654 | H             | -1.30611 | -2.35983 | 1.861958 |
| H             | 1.816378 | 3.2853   | 1.764826 | H             | -3.67326 | -2.19275 | 0.958167 |
| H             | -2.26139 | -4.09143 | -0.71515 | H             | -5.22481 | -2.06007 | -0.98532 |
| H             | -0.77228 | -3.93    | 0.232024 | H             | -4.41864 | -0.5011  | -0.73772 |
| H             | -2.31962 | -3.30992 | 0.850759 | H             | -3.89073 | -1.57299 | -2.04277 |
| H             | -4.9622  | -1.63668 | 1.133023 | H             | -4.12175 | -4.17678 | -0.54584 |
| 07_1S4R10S_18 |          |          |          | H             | -2.62171 | -3.82995 | -1.41833 |
| C             | 2.547388 | 1.637417 | -0.45018 | H             | -2.57301 | -4.30487 | 0.289255 |
| C             | 1.230127 | 1.83062  | -0.2744  | H             | 3.200099 | 3.617125 | 0.188539 |
| C             | 3.036138 | 0.330895 | -1.04952 | H             | 4.244099 | 2.301589 | 0.728359 |
| C             | 0.517178 | 3.03687  | 0.287831 | H             | 4.289388 | 2.810381 | -0.95468 |
| C             | 3.794753 | -0.58775 | -0.07852 | H             | -3.33187 | 2.162102 | 1.799179 |
| C             | -0.84645 | 3.326866 | -0.377   | H             | -1.61486 | 2.300511 | 2.20222  |
| C             | -2.06256 | 2.47047  | 0.056241 | H             | -2.53743 | 3.744636 | 1.734765 |
| C             | -1.90296 | 1.015679 | -0.34035 | H             | -3.91953 | 2.465954 | -0.58155 |
| C             | -2.04601 | -0.06752 | 0.431275 | H             | 2.60303  | -3.95478 | 0.674701 |
| C             | -1.88415 | -1.49698 | -0.03392 | H             | 1.07142  | -3.8834  | -0.20948 |
| C             | 2.926161 | -1.1708  | 1.062154 | H             | 2.548023 | -3.1752  | -0.89813 |
| C             | 1.7022   | -1.99505 | 0.692071 | H             | 4.875606 | -2.20697 | -0.30384 |
| C             | 0.476803 | -1.55152 | 1.027718 | 07_1S4R10S_19 |          |          |          |
| C             | -0.85232 | -2.24351 | 0.863562 | C             | -2.25681 | -1.61664 | -0.59267 |
| C             | -3.25912 | -2.23832 | -0.06162 | C             | -1.00882 | -1.87557 | -1.01831 |

|   |          |          |          |               |          |          |          |
|---|----------|----------|----------|---------------|----------|----------|----------|
| C | -2.93565 | -0.31735 | -0.99794 | H             | -3.35802 | -2.22071 | 1.182857 |
| C | -0.21272 | -3.15201 | -0.86369 | H             | -4.05685 | -2.78067 | -0.33058 |
| C | -3.70865 | 0.456993 | 0.088688 | H             | 2.265309 | -2.7084  | 2.453028 |
| C | 1.325623 | -3.00508 | -0.88934 | H             | 0.595611 | -2.90087 | 1.883732 |
| C | 2.033253 | -2.36803 | 0.331816 | H             | 1.80459  | -4.16007 | 1.541047 |
| C | 1.814383 | -0.86717 | 0.479329 | H             | 3.775502 | -2.04878 | -0.51847 |
| C | 1.784334 | 0.025753 | -0.51547 | H             | -2.53602 | 3.806626 | 0.956122 |
| C | 1.586047 | 1.524271 | -0.41082 | H             | -0.9855  | 3.767276 | 0.094939 |
| C | -2.85845 | 1.010887 | 1.247998 | H             | -2.46024 | 3.11099  | -0.64965 |
| C | -1.64    | 1.846763 | 0.893019 | H             | -4.93651 | 1.216934 | -1.23473 |
| C | -0.41822 | 1.360617 | 1.169604 | 07_1S4R10S_20 |          |          |          |
| C | 0.929207 | 1.991761 | 0.915045 | C             | 2.564153 | 1.616778 | -0.45054 |
| C | 2.912386 | 2.272681 | -0.76626 | C             | 1.252602 | 1.805652 | -0.23256 |
| C | 2.676137 | 3.755295 | -1.09485 | C             | 3.040255 | 0.298272 | -1.03572 |
| C | 4.004825 | 2.111815 | 0.301362 | C             | 0.548741 | 3.016373 | 0.329366 |
| C | -3.10267 | -2.59974 | 0.184263 | C             | 3.786648 | -0.62792 | -0.05212 |
| C | 1.645004 | -3.0802  | 1.630866 | C             | -0.80045 | 3.330057 | -0.35548 |
| O | 3.458115 | -2.62113 | 0.198745 | C             | -2.03519 | 2.488456 | 0.053269 |
| C | -1.90324 | 3.205217 | 0.288317 | C             | -1.88629 | 1.031972 | -0.34153 |
| O | -4.40014 | 1.566199 | -0.5048  | C             | -2.05083 | -0.04938 | 0.428348 |
| H | -0.51699 | -1.10138 | -1.6055  | C             | -1.89857 | -1.48108 | -0.03313 |
| H | -3.6754  | -0.55492 | -1.78302 | C             | 2.907748 | -1.20684 | 1.074662 |
| H | -2.20423 | 0.359174 | -1.45334 | C             | 1.673764 | -2.0133  | 0.693608 |
| H | -0.51244 | -3.69991 | 0.036056 | C             | 0.454824 | -1.56143 | 1.042542 |
| H | -0.46623 | -3.81797 | -1.70427 | C             | -0.8831  | -2.23629 | 0.875802 |
| H | -4.45248 | -0.21764 | 0.541475 | C             | -3.28162 | -2.20654 | -0.07436 |
| H | 1.756883 | -4.00866 | -0.9864  | C             | -4.25571 | -1.51169 | -1.03916 |
| H | 1.619904 | -2.46326 | -1.79888 | C             | -3.16501 | -3.69408 | -0.45002 |
| H | 1.719373 | -0.52096 | 1.507387 | C             | 3.640242 | 2.637013 | -0.16118 |
| H | 1.907688 | -0.32641 | -1.54178 | C             | -2.39787 | 2.697629 | 1.528952 |
| H | 0.87514  | 1.785622 | -1.21034 | O             | -3.09039 | 3.055265 | -0.76788 |
| H | -2.53947 | 0.155509 | 1.854832 | C             | 1.930581 | -3.33689 | 0.011438 |
| H | -3.54311 | 1.60335  | 1.872852 | O             | 4.388278 | -1.72447 | -0.75352 |
| H | -0.38112 | 0.365326 | 1.60613  | H             | 0.596997 | 0.974022 | -0.47447 |
| H | 0.845059 | 3.082823 | 0.888883 | H             | 3.73133  | 0.508609 | -1.86843 |
| H | 1.594167 | 1.759279 | 1.757108 | H             | 2.195233 | -0.25726 | -1.45714 |
| H | 3.283601 | 1.797474 | -1.6874  | H             | 0.385187 | 2.885042 | 1.409858 |
| H | 3.597223 | 4.21758  | -1.4693  | H             | 1.185826 | 3.903498 | 0.240104 |
| H | 1.90383  | 3.876462 | -1.86425 | H             | 4.582271 | -0.04834 | 0.443809 |
| H | 2.363421 | 4.324739 | -0.21158 | H             | -1.06788 | 4.375088 | -0.15499 |
| H | 4.954101 | 2.528579 | -0.0553  | H             | -0.68545 | 3.244865 | -1.44338 |
| H | 3.743832 | 2.639297 | 1.226708 | H             | -1.64255 | 0.892898 | -1.39647 |
| H | 4.17028  | 1.057764 | 0.549669 | H             | -2.30454 | 0.072419 | 1.483203 |
| H | -2.61057 | -3.56634 | 0.314622 | H             | -1.49489 | -1.47308 | -1.05655 |

|               |          |          |          |               |          |          |          |
|---------------|----------|----------|----------|---------------|----------|----------|----------|
| H             | 2.604909 | -0.36467 | 1.70646  | C             | 1.950125 | -3.32797 | 0.004626 |
| H             | 3.568449 | -1.84006 | 1.685545 | O             | 4.399879 | -1.69829 | -0.74594 |
| H             | 0.411713 | -0.59332 | 1.541271 | H             | 0.591296 | 0.966197 | -0.43597 |
| H             | -0.75479 | -3.25085 | 0.493385 | H             | 3.718165 | 0.517879 | -1.87006 |
| H             | -1.34441 | -2.34031 | 1.871985 | H             | 2.187419 | -0.25247 | -1.44831 |
| H             | -3.70948 | -2.14799 | 0.939065 | H             | 0.371211 | 2.88479  | 1.424771 |
| H             | -5.23326 | -2.00777 | -1.02389 | H             | 1.166493 | 3.906883 | 0.25355  |
| H             | -4.40565 | -0.45892 | -0.78284 | H             | 4.574191 | -0.01862 | 0.449726 |
| H             | -3.87893 | -1.553   | -2.06989 | H             | -1.09489 | 4.366944 | -0.12853 |
| H             | -4.16205 | -4.13702 | -0.55802 | H             | -0.69444 | 3.249616 | -1.42519 |
| H             | -2.6436  | -3.8171  | -1.40857 | H             | -1.63212 | 0.874202 | -1.38137 |
| H             | -2.62886 | -4.27901 | 0.303162 | H             | -2.30432 | 0.05078  | 1.490873 |
| H             | 3.235689 | 3.59633  | 0.171286 | H             | -1.47394 | -1.48078 | -1.05137 |
| H             | 4.328115 | 2.285649 | 0.62     | H             | 2.601246 | -0.35661 | 1.712095 |
| H             | 4.253785 | 2.819273 | -1.05434 | H             | 3.577833 | -1.82343 | 1.688739 |
| H             | -3.34029 | 2.193235 | 1.771881 | H             | 0.412457 | -0.60927 | 1.559196 |
| H             | -1.6298  | 2.312241 | 2.206965 | H             | -0.73914 | -3.26582 | 0.491849 |
| H             | -2.52717 | 3.766949 | 1.723567 | H             | -1.33647 | -2.36353 | 1.873012 |
| H             | -3.88098 | 2.511341 | -0.61612 | H             | -3.7048  | -2.15622 | 0.924965 |
| H             | 2.569806 | -3.9729  | 0.639939 | H             | -5.21423 | -1.99469 | -1.0413  |
| H             | 1.014254 | -3.89108 | -0.20557 | H             | -4.36356 | -0.45565 | -0.80849 |
| H             | 2.480946 | -3.18658 | -0.92228 | H             | -3.85022 | -1.56843 | -2.08604 |
| H             | 4.937446 | -1.34922 | -1.46054 | H             | -4.15215 | -4.14183 | -0.57764 |
| 07_1S4R10S_21 |          |          |          | H             | -2.62553 | -3.82691 | -1.41537 |
| C             | 2.551426 | 1.630178 | -0.45515 | H             | -2.62641 | -4.29055 | 0.296014 |
| C             | 1.241803 | 1.808018 | -0.21669 | H             | 3.216843 | 3.618268 | 0.147333 |
| C             | 3.031239 | 0.309725 | -1.03347 | H             | 4.335738 | 2.319778 | 0.565636 |
| C             | 0.534106 | 3.016626 | 0.344243 | H             | 4.209436 | 2.852045 | -1.10589 |
| C             | 3.785704 | -0.60728 | -0.04691 | H             | -3.36902 | 2.161172 | 1.760687 |
| C             | -0.82168 | 3.324867 | -0.33491 | H             | -1.65601 | 2.297336 | 2.205277 |
| C             | -2.05841 | 2.473865 | 0.064527 | H             | -2.57184 | 3.74341  | 1.732226 |
| C             | -1.89131 | 1.018089 | -0.32861 | H             | -3.00503 | 2.8945   | -1.6133  |
| C             | -2.04364 | -0.06607 | 0.437416 | H             | 2.601419 | -3.96014 | 0.624466 |
| C             | -1.88354 | -1.49451 | -0.03014 | H             | 1.037858 | -3.89084 | -0.20712 |
| C             | 2.911424 | -1.19511 | 1.079008 | H             | 2.490862 | -3.16777 | -0.93313 |
| C             | 1.684202 | -2.01113 | 0.696386 | H             | 4.95022  | -1.31815 | -1.4494  |
| C             | 0.462317 | -1.57283 | 1.052241 | 07_1S4R10S_22 |          |          |          |
| C             | -0.8719  | -2.25354 | 0.879102 | C             | -0.62068 | -2.83897 | -0.10372 |
| C             | -3.2683  | -2.2155  | -0.08464 | C             | 0.503486 | -2.40984 | -0.70403 |
| C             | -4.22974 | -1.51244 | -1.05668 | C             | -1.95807 | -2.24356 | -0.49701 |
| C             | -3.15432 | -3.7028  | -0.46094 | C             | 1.920784 | -2.86153 | -0.46294 |
| C             | 3.622758 | 2.663447 | -0.19611 | C             | -2.63498 | -1.38557 | 0.60597  |
| C             | -2.43097 | 2.676215 | 1.533404 | C             | 2.797392 | -1.94572 | 0.42433  |
| O             | -3.19442 | 3.006626 | -0.66683 | C             | 3.136519 | -0.52958 | -0.12428 |

|   |          |          |          |               |          |          |          |
|---|----------|----------|----------|---------------|----------|----------|----------|
| C | 2.021889 | 0.477464 | 0.128724 | H             | 2.675325 | -0.76871 | -2.01313 |
| C | 1.642112 | 1.431887 | -0.7275  | H             | -4.53006 | 2.224923 | -0.46209 |
| C | 0.600514 | 2.520732 | -0.52853 | H             | -3.32669 | 2.786194 | -1.63669 |
| C | -3.51421 | -0.27604 | 0.025492 | H             | -4.39477 | 1.43209  | -2.02611 |
| C | -2.82685 | 0.904587 | -0.63966 | H             | -2.97485 | -2.86774 | 1.845134 |
| C | -1.49083 | 1.038476 | -0.70342 | 07_1S4R10S_23 |          |          |          |
| C | -0.69395 | 2.158274 | -1.32365 | C             | -2.32137 | 1.671224 | 0.578453 |
| C | 0.338912 | 2.924133 | 0.94717  | C             | -1.00731 | 1.898037 | 0.754387 |
| C | 1.604076 | 3.508963 | 1.598791 | C             | -2.92327 | 0.358744 | 1.054532 |
| C | -0.81201 | 3.936479 | 1.075364 | C             | -0.22058 | 3.154478 | 0.482666 |
| C | -0.65426 | -3.88173 | 0.990063 | C             | -3.77325 | -0.43552 | 0.042646 |
| C | 4.409399 | -0.02292 | 0.578565 | C             | 0.86824  | 3.084571 | -0.61625 |
| O | 3.490316 | -0.59646 | -1.51406 | C             | 2.122011 | 2.214914 | -0.33457 |
| C | -3.80757 | 1.897462 | -1.22199 | C             | 1.833757 | 0.736181 | -0.53054 |
| O | -3.50851 | -2.17258 | 1.430667 | C             | 1.851876 | -0.19853 | 0.422778 |
| H | 0.384261 | -1.64305 | -1.47015 | C             | 1.528404 | -1.67134 | 0.278215 |
| H | -2.67426 | -3.03649 | -0.75803 | C             | -3.00165 | -0.97808 | -1.17582 |
| H | -1.82381 | -1.62923 | -1.39264 | C             | -1.78471 | -1.84938 | -0.90676 |
| H | 1.931061 | -3.85565 | -0.0025  | C             | -0.56152 | -1.36911 | -1.1896  |
| H | 2.427551 | -2.97757 | -1.43063 | C             | 0.777243 | -2.04684 | -1.0273  |
| H | -1.85876 | -0.93003 | 1.239209 | C             | 2.776861 | -2.58334 | 0.511094 |
| H | 2.333335 | -1.83895 | 1.413358 | C             | 3.874494 | -2.39818 | -0.54712 |
| H | 3.748019 | -2.47217 | 0.578632 | C             | 3.355897 | -2.41383 | 1.924873 |
| H | 1.588542 | 0.428318 | 1.12709  | C             | -3.30013 | 2.673024 | 0.009194 |
| H | 2.119905 | 1.443906 | -1.70839 | C             | 3.245693 | 2.631053 | -1.30677 |
| H | 1.003125 | 3.416597 | -1.02819 | O             | 2.524796 | 2.512854 | 1.008924 |
| H | -4.14259 | 0.102434 | 0.845393 | C             | -2.05667 | -3.23714 | -0.37693 |
| H | -4.21936 | -0.7305  | -0.68835 | O             | -4.39727 | -1.55084 | 0.695074 |
| H | -0.87354 | 0.251123 | -0.27805 | H             | -0.42578 | 1.087656 | 1.185933 |
| H | -0.38081 | 1.868237 | -2.33903 | H             | -3.58881 | 0.580729 | 1.907392 |
| H | -1.30057 | 3.059847 | -1.44787 | H             | -2.13424 | -0.29867 | 1.435469 |
| H | 0.045871 | 2.024465 | 1.506811 | H             | -0.8909  | 3.977061 | 0.210592 |
| H | 1.422154 | 3.746848 | 2.653642 | H             | 0.27651  | 3.457572 | 1.413342 |
| H | 2.451744 | 2.82048  | 1.546995 | H             | -4.56097 | 0.224408 | -0.35434 |
| H | 1.898459 | 4.440037 | 1.096339 | H             | 0.424583 | 2.749802 | -1.56229 |
| H | -0.91799 | 4.261024 | 2.117306 | H             | 1.219778 | 4.111644 | -0.78191 |
| H | -0.61879 | 4.832197 | 0.469857 | H             | 1.593622 | 0.469368 | -1.55872 |
| H | -1.77079 | 3.51338  | 0.761818 | H             | 2.08591  | 0.126146 | 1.4364   |
| H | 0.29696  | -4.40563 | 1.112775 | H             | 0.836568 | -1.909   | 1.102134 |
| H | -0.88913 | -3.4312  | 1.966415 | H             | -2.69898 | -0.11179 | -1.77558 |
| H | -1.42829 | -4.63456 | 0.789877 | H             | -3.72888 | -1.54222 | -1.77802 |
| H | 4.66864  | 0.974841 | 0.212386 | H             | -0.51708 | -0.34983 | -1.56656 |
| H | 4.260091 | 0.030823 | 1.662225 | H             | 0.663845 | -3.13715 | -1.0387  |
| H | 5.24545  | -0.70206 | 0.377159 | H             | 1.402538 | -1.80046 | -1.89586 |

|               |          |          |          |               |          |          |          |
|---------------|----------|----------|----------|---------------|----------|----------|----------|
| H             | 2.408828 | -3.61756 | 0.433661 | H             | -0.8818  | 3.978937 | 0.19734  |
| H             | 4.718274 | -3.06912 | -0.34618 | H             | 0.285716 | 3.465095 | 1.402361 |
| H             | 3.513935 | -2.61756 | -1.55797 | H             | -4.56147 | 0.23914  | -0.31725 |
| H             | 4.255216 | -1.36997 | -0.54341 | H             | 0.430947 | 2.74115  | -1.56969 |
| H             | 4.129922 | -3.16618 | 2.117276 | H             | 1.229547 | 4.104841 | -0.79629 |
| H             | 3.818125 | -1.42827 | 2.05695  | H             | 1.600816 | 0.460936 | -1.56294 |
| H             | 2.58069  | -2.52706 | 2.692746 | H             | 2.082478 | 0.123735 | 1.43463  |
| H             | -2.84775 | 3.649786 | -0.17717 | H             | 0.828821 | -1.90715 | 1.104857 |
| H             | -3.72844 | 2.325408 | -0.94065 | H             | -2.6934  | -0.07673 | -1.75846 |
| H             | -4.14714 | 2.820947 | 0.693955 | H             | -3.72966 | -1.49545 | -1.78994 |
| H             | 4.147661 | 2.031356 | -1.13228 | H             | -0.51091 | -0.3414  | -1.55476 |
| H             | 2.945258 | 2.483827 | -2.35047 | H             | 0.647667 | -3.14091 | -1.03085 |
| H             | 3.495279 | 3.687558 | -1.16216 | H             | 1.396023 | -1.8127  | -1.89351 |
| H             | 3.348087 | 2.024639 | 1.17491  | H             | 2.39362  | -3.62455 | 0.442656 |
| H             | -2.73382 | -3.77955 | -1.0518  | H             | 4.705836 | -3.08816 | -0.3387  |
| H             | -1.14732 | -3.83295 | -0.26062 | H             | 3.503482 | -2.63729 | -1.55267 |
| H             | -2.56877 | -3.18716 | 0.589461 | H             | 4.249038 | -1.38818 | -0.54306 |
| H             | -4.87014 | -1.20515 | 1.469283 | H             | 4.116409 | -3.17434 | 2.124757 |
| 07_1S4R10S_24 |          |          |          | H             | 3.812473 | -1.43527 | 2.057563 |
| C             | -2.31595 | 1.677664 | 0.588594 | H             | 2.570075 | -2.52584 | 2.69763  |
| C             | -0.99993 | 1.902628 | 0.752171 | H             | -2.84634 | 3.658367 | -0.15939 |
| C             | -2.91388 | 0.366794 | 1.072509 | H             | -3.73805 | 2.33664  | -0.91481 |
| C             | -0.21237 | 3.157057 | 0.4738   | H             | -4.13758 | 2.830062 | 0.725046 |
| C             | -3.76668 | -0.42032 | 0.066115 | H             | 4.154304 | 2.019849 | -1.1372  |
| C             | 0.875849 | 3.079355 | -0.62538 | H             | 2.953437 | 2.47252  | -2.35686 |
| C             | 2.128422 | 2.208272 | -0.34098 | H             | 3.504825 | 3.677115 | -1.17011 |
| C             | 1.838304 | 0.729478 | -0.53453 | H             | 3.352723 | 2.018222 | 1.169957 |
| C             | 1.850857 | -0.20294 | 0.421134 | H             | -2.75665 | -3.75817 | -1.08345 |
| C             | 1.521748 | -1.67497 | 0.280386 | H             | -1.18034 | -3.83219 | -0.27791 |
| C             | -3.00005 | -0.94941 | -1.16894 | H             | -2.59871 | -3.17554 | 0.566494 |
| C             | -1.79254 | -1.83629 | -0.91529 | H             | -4.92165 | -1.99612 | 0.217776 |
| C             | -0.56426 | -1.36393 | -1.1883  | 07_1S4R10S_25 |          |          |          |
| C             | 0.768857 | -2.05138 | -1.0241  | C             | -0.87553 | -2.79204 | -0.17653 |
| C             | 2.766135 | -2.59163 | 0.516229 | C             | 0.269194 | -2.37744 | -0.74812 |
| C             | 3.864557 | -2.41498 | -0.54261 | C             | -2.17589 | -2.08248 | -0.50215 |
| C             | 3.345819 | -2.41924 | 1.9294   | C             | 1.654083 | -2.93978 | -0.56067 |
| C             | -3.29853 | 2.682187 | 0.030787 | C             | -2.7237  | -1.20441 | 0.644768 |
| C             | 3.253466 | 2.620834 | -1.31318 | C             | 2.58849  | -2.16875 | 0.401012 |
| O             | 2.530672 | 2.507895 | 1.002136 | C             | 3.099937 | -0.77737 | -0.04979 |
| C             | -2.08166 | -3.22531 | -0.39769 | C             | 2.087299 | 0.340041 | 0.164088 |
| O             | -4.37546 | -1.47462 | 0.827747 | C             | 1.690614 | 1.220783 | -0.75961 |
| H             | -0.41598 | 1.09099  | 1.177989 | C             | 0.784994 | 2.43021  | -0.59061 |
| H             | -3.57709 | 0.57326  | 1.926634 | C             | -3.53168 | -0.00098 | 0.136088 |
| H             | -2.11925 | -0.29032 | 1.442298 | C             | -2.77764 | 1.123724 | -0.55612 |

|   |          |          |          |               |          |                   |
|---|----------|----------|----------|---------------|----------|-------------------|
| C | -1.43762 | 1.144593 | -0.65921 | 07_1S4R10S_26 |          |                   |
| C | -0.56469 | 2.173364 | -1.33137 | C             | 1.691817 | -1.56265 1.137389 |
| C | 0.621836 | 2.936505 | 0.866734 | C             | 1.271019 | -2.24728 0.062015 |
| C | 1.956477 | 3.458627 | 1.42859  | C             | 2.790738 | -0.51618 1.114133 |
| C | -0.44087 | 4.04178  | 0.987222 | C             | 0.198424 | -3.3057 -0.02073  |
| C | -0.98591 | -3.93128 | 0.808462 | C             | 3.637493 | -0.28918 -0.14438 |
| C | 4.354401 | -0.42804 | 0.783627 | C             | -0.9432  | -3.00738 -1.02296 |
| O | 3.475798 | -0.91105 | -1.42673 | C             | -2.12944 | -2.1533 -0.50812  |
| C | -3.69039 | 2.189514 | -1.11859 | C             | -1.69631 | -0.79075 -0.00357 |
| O | -3.55793 | -2.04982 | 1.454087 | C             | -1.99912 | 0.40735 -0.5153   |
| H | 0.206004 | -1.53898 | -1.44036 | C             | -1.50248 | 1.729981 0.025816 |
| H | -2.96482 | -2.80947 | -0.74308 | C             | 2.940041 | 0.420257 -1.33673 |
| H | -2.03415 | -1.45695 | -1.38801 | C             | 2.005709 | 1.567404 -0.99945 |
| H | 1.597343 | -3.96886 | -0.18773 | C             | 0.692077 | 1.412263 -1.23771 |
| H | 2.150175 | -2.99351 | -1.53683 | C             | -0.45064 | 2.346954 -0.95012 |
| H | -1.88507 | -0.84139 | 1.256637 | C             | -2.68707 | 2.701912 0.304315 |
| H | 2.103408 | -2.05713 | 1.378937 | C             | -3.70051 | 2.081117 1.279846 |
| H | 3.473912 | -2.79806 | 0.560042 | C             | -2.22637 | 4.067253 0.841563 |
| H | 1.768015 | 0.451489 | 1.200013 | C             | 1.111137 | -1.73458 2.524452 |
| H | 2.024326 | 1.060593 | -1.78637 | C             | -3.20552 | -2.08068 -1.60099 |
| H | 1.266809 | 3.247951 | -1.15211 | O             | -2.65647 | -2.89852 0.617732 |
| H | -4.0769  | 0.429212 | 0.992915 | C             | 2.650496 | 2.811684 -0.43678 |
| H | -4.31694 | -0.37757 | -0.53795 | O             | 4.761807 | 0.476386 0.325447 |
| H | -0.87662 | 0.312996 | -0.24129 | H             | 1.759044 | -2.05303 -0.89223 |
| H | -0.31324 | 1.825863 | -2.34591 | H             | 3.505475 | -0.76042 1.913409 |
| H | -1.0897  | 3.123296 | -1.46708 | H             | 2.351734 | 0.447236 1.412218 |
| H | 0.288552 | 2.094234 | 1.489696 | H             | 0.677566 | -4.23791 -0.356   |
| H | 1.845973 | 3.757886 | 2.477693 | H             | -0.24089 | -3.52718 0.954693 |
| H | 2.752347 | 2.71125  | 1.371572 | H             | 3.999074 | -1.26335 -0.51166 |
| H | 2.287433 | 4.342304 | 0.866733 | H             | -0.53791 | -2.53021 -1.92435 |
| H | -0.46629 | 4.432941 | 2.011195 | H             | -1.37551 | -3.96498 -1.34068 |
| H | -0.21363 | 4.883639 | 0.31943  | H             | -1.07114 | -0.83384 0.886106 |
| H | -1.44415 | 3.677944 | 0.747719 | H             | -2.61551 | 0.477195 -1.41386 |
| H | -0.01874 | -4.36115 | 1.080663 | H             | -0.99053 | 1.541051 0.981157 |
| H | -1.48907 | -3.59977 | 1.724453 | H             | 2.385028 | -0.33007 -1.90867 |
| H | -1.61152 | -4.73576 | 0.395853 | H             | 3.743321 | 0.771479 -2.00569 |
| H | 4.75323  | 0.549799 | 0.486868 | H             | 0.38546  | 0.46136 -1.66976  |
| H | 4.123169 | -0.38289 | 1.853919 | H             | -0.08723 | 3.291402 -0.53795 |
| H | 5.130219 | -1.18547 | 0.627575 | H             | -0.96661 | 2.595662 -1.8919  |
| H | 3.926643 | -0.08978 | -1.68279 | H             | -3.20219 | 2.872118 -0.65458 |
| H | -4.38056 | 2.560386 | -0.34847 | H             | -4.54662 | 2.758918 1.442994 |
| H | -3.15041 | 3.046148 | -1.52848 | H             | -4.09449 | 1.12961 0.909395  |
| H | -4.31686 | 1.776815 | -1.92187 | H             | -3.23433 | 1.889853 2.255664 |
| H | -3.81227 | -1.54041 | 2.240564 | H             | -3.09278 | 4.685484 1.104555 |

|               |          |          |          |               |          |          |          |
|---------------|----------|----------|----------|---------------|----------|----------|----------|
| H             | -1.6194  | 3.946207 | 1.748701 | H             | -1.06728 | -0.83938 | 0.888557 |
| H             | -1.63451 | 4.630051 | 0.113388 | H             | -2.62639 | 0.458113 | -1.40898 |
| H             | 0.26074  | -2.4184  | 2.557404 | H             | -1.00268 | 1.535275 | 0.980794 |
| H             | 1.873577 | -2.11226 | 3.22002  | H             | 2.39646  | -0.29944 | -1.93022 |
| H             | 0.779598 | -0.76723 | 2.927103 | H             | 3.751029 | 0.819795 | -1.99176 |
| H             | -4.07925 | -1.51859 | -1.25153 | H             | 0.382583 | 0.463091 | -1.67675 |
| H             | -2.83213 | -1.59584 | -2.50959 | H             | -0.1155  | 3.289359 | -0.54552 |
| H             | -3.53136 | -3.0927  | -1.8602  | H             | -0.98989 | 2.580718 | -1.8956  |
| H             | -3.34345 | -2.34388 | 1.022379 | H             | -3.22553 | 2.850655 | -0.65251 |
| H             | 3.311885 | 3.268708 | -1.18754 | H             | -4.56509 | 2.732256 | 1.447765 |
| H             | 1.923683 | 3.568964 | -0.13161 | H             | -4.10337 | 1.104872 | 0.916459 |
| H             | 3.286909 | 2.569073 | 0.420996 | H             | -3.24555 | 1.873372 | 2.259512 |
| H             | 5.320202 | 0.671633 | -0.44407 | H             | -3.12326 | 4.666957 | 1.104543 |
| 07_1S4R10S_27 |          |          |          | H             | -1.64322 | 3.937907 | 1.745053 |
| C             | 1.706512 | -1.54514 | 1.131674 | H             | -1.66773 | 4.619593 | 0.108955 |
| C             | 1.284005 | -2.22851 | 0.056199 | H             | 0.286518 | -2.40985 | 2.556631 |
| C             | 2.806194 | -0.49767 | 1.100643 | H             | 1.901726 | -2.10291 | 3.211987 |
| C             | 0.220564 | -3.29638 | -0.02291 | H             | 0.803104 | -0.75893 | 2.9298   |
| C             | 3.644819 | -0.26577 | -0.16892 | H             | -4.0772  | -1.5502  | -1.2378  |
| C             | -0.9269  | -3.01041 | -1.02161 | H             | -2.83447 | -1.61699 | -2.5008  |
| C             | -2.11902 | -2.16774 | -0.50214 | H             | -3.51801 | -3.1197  | -1.8483  |
| C             | -1.69531 | -0.80178 | 0.000613 | H             | -3.3259  | -2.3701  | 1.032492 |
| C             | -2.00745 | 0.393486 | -0.51181 | H             | 3.288477 | 3.289454 | -1.16673 |
| C             | -1.51757 | 1.719674 | 0.026088 | H             | 1.883346 | 3.580597 | -0.12825 |
| C             | 2.941293 | 0.448981 | -1.34722 | H             | 3.248509 | 2.592635 | 0.43993  |
| C             | 1.99124  | 1.580346 | -0.99586 | H             | 5.243289 | 0.120543 | 0.903086 |
| C             | 0.67977  | 1.414313 | -1.2387  | 07_1S4R10S_28 |          |          |          |
| C             | -0.47118 | 2.340093 | -0.95324 | C             | -2.19615 | 1.686106 | 0.319591 |
| C             | -2.70729 | 2.685046 | 0.305485 | C             | -1.35664 | 1.811072 | -0.72319 |
| C             | -3.71489 | 2.059683 | 1.284218 | C             | -2.71491 | 0.31094  | 0.736092 |
| C             | -2.25372 | 4.053957 | 0.839621 | C             | -0.58652 | 3.010229 | -1.20486 |
| C             | 1.135052 | -1.7238  | 2.521595 | C             | -3.23117 | -0.62243 | -0.38082 |
| C             | -3.20004 | -2.10478 | -1.59062 | C             | 0.939499 | 2.759398 | -1.27136 |
| O             | -2.63462 | -2.9179  | 0.625833 | C             | 1.62585  | 2.40817  | 0.078968 |
| C             | 2.619842 | 2.829328 | -0.4252  | C             | 1.582937 | 0.932203 | 0.468553 |
| O             | 4.781517 | 0.550278 | 0.165021 | C             | 1.715339 | -0.15298 | -0.30252 |
| H             | 1.764775 | -2.02688 | -0.90008 | C             | 1.781316 | -1.57195 | 0.2248   |
| H             | 3.516843 | -0.75717 | 1.903383 | C             | -3.11565 | -2.10071 | -0.00077 |
| H             | 2.375893 | 0.466051 | 1.409318 | C             | -1.71891 | -2.70652 | 0.039787 |
| H             | 0.708573 | -4.22362 | -0.3592  | C             | -0.63941 | -2.07035 | -0.44588 |
| H             | -0.21332 | -3.52195 | 0.954013 | C             | 0.794269 | -2.52334 | -0.51292 |
| H             | 4.002714 | -1.23865 | -0.54249 | C             | 3.233184 | -2.15343 | 0.200397 |
| H             | -0.5295  | -2.52959 | -1.92449 | C             | 3.906095 | -2.0865  | -1.18035 |
| H             | -1.35067 | -3.97248 | -1.33717 | C             | 4.121656 | -1.48981 | 1.26231  |



|               |          |          |          |   |          |          |          |
|---------------|----------|----------|----------|---|----------|----------|----------|
| C             | -2.62209 | 2.820801 | 1.222394 | C | -3.28876 | -0.00808 | -0.43934 |
| C             | 3.093616 | 2.86563  | 0.048665 | C | 0.98589  | 2.983424 | -1.18471 |
| O             | 1.030506 | 3.174295 | 1.147202 | C | 2.099416 | 2.148751 | -0.50582 |
| C             | -1.69301 | -4.09111 | 0.644807 | C | 1.615437 | 0.830971 | 0.079396 |
| O             | -4.62132 | -0.38119 | -0.64466 | C | 1.862836 | -0.40407 | -0.37507 |
| H             | -1.13346 | 0.912326 | -1.29523 | C | 1.424896 | -1.68588 | 0.297682 |
| H             | -3.53863 | 0.42094  | 1.452597 | C | -3.44259 | -1.52967 | -0.40816 |
| H             | -1.90709 | -0.19954 | 1.277237 | C | -2.15885 | -2.3482  | -0.37695 |
| H             | -0.91268 | 3.27244  | -2.22226 | C | -0.94823 | -1.81041 | -0.60672 |
| H             | -0.7739  | 3.891732 | -0.5854  | C | 0.403357 | -2.47466 | -0.57795 |
| H             | -2.67054 | -0.45242 | -1.30848 | C | 2.631381 | -2.58693 | 0.708388 |
| H             | 1.153428 | 1.969724 | -2.0023  | C | 3.489401 | -3.06334 | -0.47552 |
| H             | 1.403136 | 3.673734 | -1.66238 | C | 3.504862 | -1.90653 | 1.772526 |
| H             | 1.515685 | 0.793559 | 1.549617 | C | -1.75688 | 2.426246 | 2.25885  |
| H             | 1.805325 | -0.04074 | -1.3847  | C | 3.257026 | 1.968963 | -1.50067 |
| H             | 1.472805 | -1.54809 | 1.27962  | O | 2.55443  | 2.972874 | 0.594424 |
| H             | -3.72896 | -2.67426 | -0.71161 | C | -2.40076 | -3.81103 | -0.08359 |
| H             | -3.5979  | -2.24681 | 0.97802  | O | -4.58646 | 0.528388 | -0.74217 |
| H             | -0.78256 | -1.07698 | -0.85915 | H | -1.41556 | 1.718415 | -1.14292 |
| H             | 0.920467 | -3.53204 | -0.10575 | H | -3.63948 | 0.712781 | 1.535904 |
| H             | 1.089813 | -2.5807  | -1.57174 | H | -2.17636 | -0.23446 | 1.403826 |
| H             | 3.136882 | -3.21574 | 0.470863 | H | -0.73039 | 4.210931 | -0.83018 |
| H             | 4.877614 | -2.5939  | -1.15394 | H | 0.094275 | 3.727397 | 0.642417 |
| H             | 3.30582  | -2.56747 | -1.96071 | H | -2.61263 | 0.243786 | -1.26415 |
| H             | 4.085912 | -1.04856 | -1.48506 | H | 0.658689 | 2.449205 | -2.08591 |
| H             | 5.119615 | -1.94429 | 1.27325  | H | 1.464718 | 3.910771 | -1.52408 |
| H             | 4.242951 | -0.41856 | 1.064521 | H | 1.038693 | 0.948481 | 0.996042 |
| H             | 3.692748 | -1.59814 | 2.265956 | H | 2.424521 | -0.52957 | -1.30091 |
| H             | -2.19094 | 3.785879 | 0.943794 | H | 0.909008 | -1.4183  | 1.230741 |
| H             | -3.7154  | 2.928434 | 1.207572 | H | -4.03708 | -1.82452 | -1.28578 |
| H             | -2.35262 | 2.614944 | 2.268162 | H | -4.05852 | -1.8015  | 0.46292  |
| H             | 3.604549 | 2.584761 | 0.975407 | H | -0.88959 | -0.74583 | -0.81904 |
| H             | 3.620542 | 2.403376 | -0.79226 | H | 0.33626  | -3.50087 | -0.20076 |
| H             | 3.142638 | 3.955267 | -0.05883 | H | 0.799358 | -2.54856 | -1.60233 |
| H             | 0.14348  | 2.805133 | 1.290334 | H | 2.188279 | -3.48129 | 1.171737 |
| H             | -2.37553 | -4.76209 | 0.104869 | H | 4.260185 | -3.76126 | -0.12788 |
| H             | -0.70081 | -4.54772 | 0.635752 | H | 2.8943   | -3.58231 | -1.23494 |
| H             | -2.04391 | -4.06649 | 1.685686 | H | 4.004112 | -2.22718 | -0.96391 |
| H             | -4.69784 | 0.544923 | -0.92589 | H | 4.295003 | -2.58318 | 2.119338 |
| 07_1S4R10S_29 |          |          |          | H | 3.985798 | -1.00468 | 1.375813 |
| C             | -1.89153 | 1.800035 | 0.890343 | H | 2.910241 | -1.60936 | 2.645113 |
| C             | -1.24132 | 2.235975 | -0.20019 | H | -2.72765 | 2.809487 | 2.603234 |
| C             | -2.75984 | 0.548328 | 0.89712  | H | -1.44139 | 1.67802  | 2.999645 |
| C             | -0.24409 | 3.359069 | -0.32987 | H | -1.04275 | 3.252071 | 2.287569 |

|               |          |          |          |               |          |          |          |
|---------------|----------|----------|----------|---------------|----------|----------|----------|
| H             | 4.084709 | 1.41747  | -1.04021 | H             | 0.38991  | 0.646789 | -1.56344 |
| H             | 2.943714 | 1.422672 | -2.39715 | H             | -0.20911 | 3.369497 | -0.22471 |
| H             | 3.627228 | 2.951113 | -1.81046 | H             | -1.0643  | 2.702898 | -1.60973 |
| H             | 3.207215 | 2.449682 | 1.088024 | H             | -2.15958 | 3.536102 | 1.124541 |
| H             | -3.1025  | -4.23914 | -0.81292 | H             | -4.35005 | 3.763212 | 0.027844 |
| H             | -1.49007 | -4.41334 | -0.10817 | H             | -3.10796 | 3.518507 | -1.20471 |
| H             | -2.86631 | -3.9388  | 0.903559 | H             | -4.18388 | 2.186195 | -0.74901 |
| H             | -4.48968 | 1.494011 | -0.77078 | H             | -4.18009 | 2.679885 | 2.304247 |
| 07_1S4R10S_30 |          |          |          | H             | -3.90881 | 1.066164 | 1.62258  |
| C             | 1.83284  | -1.55304 | 0.975383 | H             | -2.73801 | 1.754196 | 2.758379 |
| C             | 1.409331 | -2.14086 | -0.15482 | H             | 0.465858 | -2.59816 | 2.329997 |
| C             | 2.878383 | -0.45462 | 1.036546 | H             | 2.096528 | -2.34015 | 2.972964 |
| C             | 0.390045 | -3.24223 | -0.31695 | H             | 0.971293 | -0.99258 | 2.87411  |
| C             | 3.697157 | -0.07004 | -0.20208 | H             | -4.05457 | -1.57612 | -1.02025 |
| C             | -0.83623 | -2.8868  | -1.19255 | H             | -2.9242  | -1.49738 | -2.38364 |
| C             | -2.01913 | -2.16311 | -0.499   | H             | -3.49276 | -3.07204 | -1.79503 |
| C             | -1.62395 | -0.82127 | 0.086345 | H             | -3.09122 | -2.57353 | 1.093261 |
| C             | -1.98155 | 0.395836 | -0.33925 | H             | 3.188518 | 3.56195  | -0.95565 |
| C             | -1.49311 | 1.689046 | 0.272945 | H             | 1.82174  | 3.704029 | 0.160533 |
| C             | 2.952928 | 0.714294 | -1.31625 | H             | 3.251415 | 2.736857 | 0.591813 |
| C             | 1.975833 | 1.78388  | -0.86436 | H             | 5.327234 | 0.99825  | -0.42206 |
| C             | 0.664502 | 1.579978 | -1.07411 | 07_1S4R10S_31 |          |          |          |
| C             | -0.51716 | 2.42881  | -0.69533 | C             | -2.32157 | 1.670807 | 0.579266 |
| C             | -2.6459  | 2.622068 | 0.751473 | C             | -1.00743 | 1.897168 | 0.755223 |
| C             | -3.62036 | 3.043279 | -0.36116 | C             | -2.92383 | 0.358219 | 1.054539 |
| C             | -3.41142 | 1.99496  | 1.926758 | C             | -0.22041 | 3.153559 | 0.484134 |
| C             | 1.304661 | -1.89971 | 2.350983 | C             | -3.77345 | -0.43543 | 0.041833 |
| C             | -3.19199 | -2.06616 | -1.48644 | C             | 0.867624 | 3.084393 | -0.61564 |
| O             | -2.39841 | -3.0352  | 0.59305  | C             | 2.121892 | 2.214989 | -0.33528 |
| C             | 2.576025 | 3.013157 | -0.22513 | C             | 1.833679 | 0.736235 | -0.5307  |
| O             | 4.788839 | 0.702664 | 0.329587 | C             | 1.85214  | -0.19832 | 0.422773 |
| H             | 1.85061  | -1.81846 | -1.09689 | C             | 1.52867  | -1.6711  | 0.278553 |
| H             | 3.615279 | -0.73605 | 1.802738 | C             | -3.00125 | -0.97786 | -1.17631 |
| H             | 2.397951 | 0.454691 | 1.426837 | C             | -1.7845  | -1.84925 | -0.90674 |
| H             | 0.893496 | -4.08742 | -0.80988 | C             | -0.56117 | -1.3692  | -1.18946 |
| H             | 0.036274 | -3.62226 | 0.644189 | C             | 0.777502 | -2.04699 | -1.02685 |
| H             | 4.100478 | -0.98662 | -0.66259 | C             | 2.777194 | -2.58309 | 0.511653 |
| H             | -0.52195 | -2.28408 | -2.05402 | C             | 3.874671 | -2.39831 | -0.54676 |
| H             | -1.24586 | -3.82261 | -1.59469 | C             | 3.356419 | -2.41301 | 1.925289 |
| H             | -0.96955 | -0.89909 | 0.952698 | C             | -3.30003 | 2.673196 | 0.010529 |
| H             | -2.62013 | 0.49423  | -1.21732 | C             | 3.244412 | 2.631246 | -1.3088  |
| H             | -0.90713 | 1.43189  | 1.166719 | O             | 2.526253 | 2.513251 | 1.007685 |
| H             | 2.423166 | -0.00371 | -1.95051 | C             | -2.05662 | -3.23686 | -0.37664 |
| H             | 3.730537 | 1.160404 | -1.95851 | O             | -4.39828 | -1.55078 | 0.693429 |

|               |          |          |          |   |          |          |          |
|---------------|----------|----------|----------|---|----------|----------|----------|
| H             | -0.42611 | 1.086364 | 1.186248 | C | -1.51154 | 1.678617 | 0.273787 |
| H             | -3.58976 | 0.579901 | 1.907182 | C | 2.947376 | 0.746618 | -1.3266  |
| H             | -2.13509 | -0.29948 | 1.435553 | C | 1.955951 | 1.796953 | -0.85805 |
| H             | -0.89067 | 3.976599 | 0.213295 | C | 0.64725  | 1.584426 | -1.0755  |
| H             | 0.277453 | 3.45563  | 1.414726 | C | -0.54194 | 2.423276 | -0.69673 |
| H             | -4.56069 | 0.224944 | -0.35539 | C | -2.6715  | 2.60349  | 0.750842 |
| H             | 0.423393 | 2.749944 | -1.56152 | C | -3.64948 | 3.014932 | -0.36235 |
| H             | 1.218789 | 4.111638 | -0.78109 | C | -3.43177 | 1.972803 | 1.927629 |
| H             | 1.59323  | 0.469189 | -1.55875 | C | 1.337564 | -1.88766 | 2.350063 |
| H             | 2.086456 | 0.126496 | 1.436292 | C | -3.18071 | -2.09317 | -1.47815 |
| H             | 0.836843 | -1.90862 | 1.102533 | O | -2.37243 | -3.05406 | 0.599599 |
| H             | -2.69822 | -0.11155 | -1.77585 | C | 2.540377 | 3.026784 | -0.20516 |
| H             | -3.72824 | -1.54189 | -1.77891 | O | 4.803306 | 0.796635 | 0.166595 |
| H             | -0.51658 | -0.35002 | -1.5667  | H | 1.855945 | -1.78952 | -1.10183 |
| H             | 0.664051 | -3.1373  | -1.03787 | H | 3.634105 | -0.72845 | 1.788166 |
| H             | 1.402848 | -1.80097 | -1.89549 | H | 2.426094 | 0.476233 | 1.425276 |
| H             | 2.409099 | -3.61733 | 0.434686 | H | 0.92698  | -4.07103 | -0.80912 |
| H             | 4.718716 | -3.06883 | -0.34546 | H | 0.067871 | -3.61323 | 0.646278 |
| H             | 3.514125 | -2.61851 | -1.55745 | H | 4.101226 | -0.95536 | -0.69786 |
| H             | 4.255066 | -1.36998 | -0.54376 | H | -0.51017 | -2.28386 | -2.0521  |
| H             | 4.13024  | -3.16549 | 2.118004 | H | -1.21616 | -3.82994 | -1.5902  |
| H             | 3.818979 | -1.42753 | 2.056794 | H | -0.9636  | -0.90358 | 0.95537  |
| H             | 2.581274 | -2.52561 | 2.693324 | H | -2.63133 | 0.472534 | -1.21234 |
| H             | -2.84759 | 3.650185 | -0.1745  | H | -0.92322 | 1.427848 | 1.167881 |
| H             | -3.72775 | 2.326632 | -0.93998 | H | 2.426408 | 0.031804 | -1.97062 |
| H             | -4.14745 | 2.820336 | 0.694955 | H | 3.728518 | 1.211565 | -1.94497 |
| H             | 4.146685 | 2.031748 | -1.1352  | H | 0.381707 | 0.653989 | -1.57515 |
| H             | 2.942898 | 2.483892 | -2.35219 | H | -0.24161 | 3.367586 | -0.22843 |
| H             | 3.493968 | 3.687803 | -1.16453 | H | -1.09181 | 2.691093 | -1.61131 |
| H             | 3.34874  | 2.023625 | 1.173403 | H | -2.19227 | 3.522076 | 1.121914 |
| H             | -2.73297 | -3.77976 | -1.05193 | H | -4.38493 | 3.729578 | 0.025587 |
| H             | -1.14721 | -3.83238 | -0.25922 | H | -3.14097 | 3.492865 | -1.2067  |
| H             | -2.56964 | -3.18664 | 0.589247 | H | -4.20616 | 2.15275  | -0.74881 |
| H             | -4.87232 | -1.20512 | 1.46692  | H | -4.20615 | 2.652149 | 2.303537 |
| 07_1S4R10S_32 |          |          |          | H | -3.92141 | 1.039126 | 1.625798 |
| C             | 1.85248  | -1.53346 | 0.971531 | H | -2.75634 | 1.739676 | 2.759825 |
| C             | 1.424877 | -2.11984 | -0.15787 | H | 2.135634 | -2.32752 | 2.96479  |
| C             | 2.897558 | -0.43202 | 1.022467 | H | 1.003642 | -0.9842  | 2.879151 |
| C             | 0.415441 | -3.23071 | -0.31615 | H | 0.501892 | -2.59001 | 2.332738 |
| C             | 3.702594 | -0.0409  | -0.22974 | H | -4.04717 | -1.61208 | -1.00987 |
| C             | -0.81605 | -2.88941 | -1.18962 | H | -2.92087 | -1.52153 | -2.37582 |
| C             | -2.00468 | -2.17818 | -0.49346 | H | -3.47182 | -3.10205 | -1.78625 |
| C             | -1.62098 | -0.83263 | 0.090606 | H | -3.06993 | -2.59999 | 1.100244 |
| C             | -1.99025 | 0.380693 | -0.33547 | H | 3.1549   | 3.584621 | -0.92629 |

|              |          |          |          |              |          |          |          |
|--------------|----------|----------|----------|--------------|----------|----------|----------|
| H            | 1.776811 | 3.707638 | 0.180323 | H            | -3.60125 | -1.36123 | 2.587168 |
| H            | 3.213234 | 2.751502 | 0.614135 | H            | -4.38138 | -0.2741  | 1.427154 |
| H            | 5.298495 | 0.323395 | 0.854672 | H            | -5.29291 | -2.60971 | -0.52344 |
| 07_1R4R10S_3 |          |          |          | H            | -4.63638 | -1.06261 | -1.06865 |
| C            | 2.731647 | 1.243619 | 0.584713 | H            | -3.87983 | -2.57982 | -1.58343 |
| C            | 1.454348 | 1.657295 | 0.671479 | H            | 3.537973 | 3.03024  | -0.37959 |
| C            | 3.118204 | -0.10108 | 1.181554 | H            | 4.63174  | 2.244143 | 0.766569 |
| C            | 0.856381 | 2.97158  | 0.232866 | H            | 4.358164 | 1.513123 | -0.80634 |
| C            | 3.646214 | -1.20169 | 0.231877 | H            | -3.30421 | 3.289315 | 0.967814 |
| C            | -0.29984 | 2.8818   | -0.79338 | H            | -1.69144 | 3.532807 | 1.646983 |
| C            | -1.71632 | 2.494631 | -0.29083 | H            | -2.23428 | 4.529352 | 0.277023 |
| C            | -1.75029 | 1.1041   | 0.316735 | H            | -3.4043  | 2.253651 | -1.2486  |
| C            | -2.12146 | -0.01033 | -0.32103 | H            | 2.01398  | -3.40684 | 1.284462 |
| C            | -2.06117 | -1.40122 | 0.26284  | H            | 0.638118 | -4.12016 | 0.439826 |
| C            | 2.683733 | -1.59415 | -0.89924 | H            | 2.270248 | -4.25662 | -0.23359 |
| C            | 1.403503 | -2.29397 | -0.47679 | H            | 5.496526 | -0.55812 | 0.272681 |
| C            | 0.21728  | -1.78574 | -0.85126 | 07_1R4R10S_4 |          |          |          |
| C            | -1.16958 | -2.32513 | -0.61945 | C            | -2.79535 | 0.829567 | -0.87462 |
| C            | -3.46726 | -2.0322  | 0.508769 | C            | -1.6106  | 1.409956 | -0.62602 |
| C            | -4.19334 | -1.32802 | 1.664446 | C            | -2.80201 | -0.56306 | -1.47589 |
| C            | -4.36222 | -2.07259 | -0.74078 | C            | -1.326   | 2.750371 | 0.009375 |
| C            | 3.862377 | 2.059548 | 0.002252 | C            | -3.16244 | -1.72454 | -0.51349 |
| C            | -2.26366 | 3.525104 | 0.712967 | C            | 0.068059 | 3.325551 | -0.31541 |
| O            | -2.5098  | 2.546262 | -1.4915  | C            | 1.299975 | 2.607009 | 0.314181 |
| C            | 1.578448 | -3.58392 | 0.291957 | C            | 1.590776 | 1.26893  | -0.35052 |
| O            | 4.872698 | -0.83543 | -0.41742 | C            | 1.908834 | 0.134463 | 0.280585 |
| H            | 0.753476 | 0.968289 | 1.137469 | C            | 2.204548 | -1.19373 | -0.37957 |
| H            | 3.898269 | 0.060503 | 1.944918 | C            | -2.54693 | -1.65349 | 0.888151 |
| H            | 2.257177 | -0.52246 | 1.71459  | C            | -1.05485 | -1.8381  | 1.101574 |
| H            | 0.504124 | 3.517456 | 1.121266 | C            | -0.16755 | -2.08568 | 0.124072 |
| H            | 1.62966  | 3.607118 | -0.20946 | C            | 1.319473 | -2.31302 | 0.246995 |
| H            | 3.835068 | -2.0874  | 0.858875 | C            | 3.725457 | -1.54003 | -0.28229 |
| H            | -0.41124 | 3.864526 | -1.26994 | C            | 4.063945 | -2.92841 | -0.85285 |
| H            | -0.03063 | 2.174868 | -1.58683 | C            | 4.590135 | -0.47845 | -0.98107 |
| H            | -1.42093 | 1.037144 | 1.353702 | C            | -4.1371  | 1.452844 | -0.57863 |
| H            | -2.44255 | 0.070409 | -1.35998 | C            | 2.530647 | 3.518079 | 0.166201 |
| H            | -1.57281 | -1.33255 | 1.245475 | O            | 1.118632 | 2.45876  | 1.730798 |
| H            | 3.254179 | -2.26224 | -1.562   | C            | -0.68607 | -1.7197  | 2.564895 |
| H            | 2.445175 | -0.69657 | -1.48056 | O            | -4.57912 | -1.77464 | -0.26979 |
| H            | 0.241045 | -0.85016 | -1.40884 | H            | -0.72788 | 0.830697 | -0.87919 |
| H            | -1.65615 | -2.44845 | -1.59851 | H            | -3.5126  | -0.61261 | -2.31722 |
| H            | -1.14605 | -3.31949 | -0.16014 | H            | -1.81621 | -0.76807 | -1.90523 |
| H            | -3.28417 | -3.07232 | 0.818496 | H            | -2.07624 | 3.489675 | -0.29869 |
| H            | -5.1596  | -1.80463 | 1.868587 | H            | -1.42576 | 2.687252 | 1.104441 |

|              |          |          |          |              |          |          |          |
|--------------|----------|----------|----------|--------------|----------|----------|----------|
| H            | -2.85028 | -2.66306 | -0.99973 | C            | -3.52171 | -1.95934 | 0.567479 |
| H            | 0.205091 | 3.364944 | -1.40464 | C            | -4.22486 | -1.20589 | 1.706485 |
| H            | 0.092757 | 4.362513 | 0.041357 | C            | -4.44147 | -2.05163 | -0.66138 |
| H            | 1.546656 | 1.278773 | -1.4408  | C            | 3.880749 | 1.988326 | 0.064834 |
| H            | 1.973387 | 0.144228 | 1.370056 | C            | -2.29607 | 3.551106 | 0.545573 |
| H            | 1.953101 | -1.11577 | -1.44881 | O            | -2.35118 | 2.594861 | -1.60487 |
| H            | -3.06937 | -2.41347 | 1.488251 | C            | 1.48646  | -3.59104 | 0.258372 |
| H            | -2.83971 | -0.69188 | 1.332765 | O            | 4.82497  | -0.90942 | -0.50756 |
| H            | -0.53536 | -2.15107 | -0.89917 | H            | 0.808772 | 0.890573 | 1.28548  |
| H            | 1.618608 | -2.44473 | 1.293215 | H            | 3.967033 | -0.09059 | 1.921307 |
| H            | 1.553433 | -3.25771 | -0.2585  | H            | 2.307043 | -0.63526 | 1.743571 |
| H            | 3.990745 | -1.54075 | 0.786618 | H            | 0.444374 | 3.370953 | 1.361007 |
| H            | 5.149378 | -3.08304 | -0.85365 | H            | 1.694575 | 3.62696  | 0.169631 |
| H            | 3.619937 | -3.74446 | -0.27498 | H            | 3.811845 | -2.19377 | 0.757118 |
| H            | 3.717114 | -3.02176 | -1.89084 | H            | -0.19495 | 3.932138 | -1.11598 |
| H            | 5.655099 | -0.71109 | -0.86404 | H            | 0.219799 | 2.258879 | -1.48023 |
| H            | 4.374171 | -0.44793 | -2.05767 | H            | -1.27475 | 1.061533 | 1.24591  |
| H            | 4.414033 | 0.522477 | -0.57754 | H            | -2.62919 | 0.120289 | -1.3269  |
| H            | -4.73321 | 1.54274  | -1.49839 | H            | -1.60456 | -1.25862 | 1.236796 |
| H            | -4.7178  | 0.817896 | 0.100948 | H            | 3.141173 | -2.26938 | -1.63724 |
| H            | -4.05115 | 2.448465 | -0.1343  | H            | 2.374738 | -0.6887  | -1.48073 |
| H            | 3.405694 | 3.041973 | 0.618955 | H            | 0.17188  | -0.82824 | -1.41185 |
| H            | 2.746587 | 3.712308 | -0.88962 | H            | -1.75036 | -2.40405 | -1.59214 |
| H            | 2.352915 | 4.47658  | 0.666521 | H            | -1.24215 | -3.27693 | -0.15401 |
| H            | 0.441692 | 1.774957 | 1.863066 | H            | -3.33304 | -2.986   | 0.916707 |
| H            | -1.24007 | -2.45425 | 3.165614 | H            | -5.18365 | -1.67707 | 1.953833 |
| H            | 0.378255 | -1.863   | 2.759361 | H            | -3.61177 | -1.19483 | 2.616033 |
| H            | -0.96733 | -0.731   | 2.953902 | H            | -4.42375 | -0.16485 | 1.425891 |
| H            | -5.01952 | -1.80422 | -1.13416 | H            | -5.37077 | -2.57151 | -0.40014 |
| 07_1R4R10S_5 |          |          |          | H            | -4.71703 | -1.05682 | -1.03136 |
| C            | 2.764119 | 1.165577 | 0.663952 | H            | -3.97919 | -2.60284 | -1.48768 |
| C            | 1.498178 | 1.592698 | 0.822191 | H            | 3.554365 | 2.977863 | -0.26387 |
| C            | 3.151211 | -0.20873 | 1.188039 | H            | 4.687439 | 2.130058 | 0.799069 |
| C            | 0.901703 | 2.931694 | 0.462177 | H            | 4.329911 | 1.467899 | -0.78701 |
| C            | 3.617369 | -1.27972 | 0.174129 | H            | -3.3571  | 3.304494 | 0.652631 |
| C            | -0.14484 | 2.924128 | -0.6846  | H            | -1.84429 | 3.556745 | 1.542311 |
| C            | -1.6168  | 2.524438 | -0.37072 | H            | -2.21267 | 4.555865 | 0.117587 |
| C            | -1.69661 | 1.141373 | 0.244867 | H            | -1.8785  | 2.047834 | -2.25371 |
| C            | -2.18816 | 0.042311 | -0.33294 | H            | 1.927792 | -3.42605 | 1.250434 |
| C            | -2.12162 | -1.34106 | 0.270016 | H            | 0.540589 | -4.11745 | 0.406064 |
| C            | 2.607705 | -1.61026 | -0.93559 | H            | 2.168381 | -4.26776 | -0.27487 |
| C            | 1.32244  | -2.29376 | -0.50021 | H            | 5.485587 | -0.68802 | 0.168411 |
| C            | 0.139718 | -1.76713 | -0.86052 | 07_1R4R10S_6 |          |          |          |
| C            | -1.25384 | -2.28424 | -0.61761 | C            | 2.731607 | 1.243716 | 0.584692 |

|   |          |          |          |              |          |          |          |
|---|----------|----------|----------|--------------|----------|----------|----------|
| C | 1.454296 | 1.657357 | 0.671533 | H            | 3.537987 | 3.030342 | -0.37959 |
| C | 3.118195 | -0.10093 | 1.181613 | H            | 4.631956 | 2.243837 | 0.766103 |
| C | 0.856243 | 2.971606 | 0.232925 | H            | 4.357728 | 1.513109 | -0.80682 |
| C | 3.646266 | -1.20156 | 0.231996 | H            | -3.30446 | 3.28928  | 0.967734 |
| C | -0.29996 | 2.881855 | -0.79333 | H            | -1.69171 | 3.532852 | 1.646917 |
| C | -1.71648 | 2.494627 | -0.29084 | H            | -2.23457 | 4.529347 | 0.276923 |
| C | -1.75041 | 1.104113 | 0.3168   | H            | -3.40445 | 2.253791 | -1.24865 |
| C | -2.12155 | -0.01034 | -0.32094 | H            | 2.01452  | -3.40725 | 1.284001 |
| C | -2.06117 | -1.40124 | 0.26291  | H            | 0.63834  | -4.12024 | 0.439599 |
| C | 2.683856 | -1.59399 | -0.8992  | H            | 2.270279 | -4.25674 | -0.23428 |
| C | 1.403677 | -2.29394 | -0.47684 | H            | 5.496547 | -0.5579  | 0.272949 |
| C | 0.21742  | -1.78559 | -0.85106 | 07_1R4R10S_7 |          |          |          |
| C | -1.16944 | -2.32504 | -0.61936 | C            | 2.719593 | 1.264136 | 0.569755 |
| C | -3.4672  | -2.03237 | 0.508751 | C            | 1.442863 | 1.674802 | 0.680105 |
| C | -4.19342 | -1.32827 | 1.664388 | C            | 3.124215 | -0.06709 | 1.187418 |
| C | -4.36209 | -2.07287 | -0.74085 | C            | 0.832549 | 2.984159 | 0.242953 |
| C | 3.862315 | 2.059533 | 0.002004 | C            | 3.658177 | -1.17583 | 0.260806 |
| C | -2.26392 | 3.52511  | 0.712894 | C            | -0.32185 | 2.888878 | -0.78483 |
| O | -2.50986 | 2.546155 | -1.49156 | C            | -1.73495 | 2.487251 | -0.28518 |
| C | 1.578681 | -3.58407 | 0.291584 | C            | -1.75614 | 1.094372 | 0.317055 |
| O | 4.87282  | -0.83531 | -0.4172  | C            | -2.11908 | -0.02055 | -0.3244  |
| H | 0.7535   | 0.968363 | 1.137645 | C            | -2.04875 | -1.41255 | 0.255255 |
| H | 3.898249 | 0.060693 | 1.94498  | C            | 2.703299 | -1.58322 | -0.87987 |
| H | 2.257174 | -0.52233 | 1.714653 | C            | 1.420143 | -2.28592 | -0.46924 |
| H | 0.503958 | 3.517445 | 1.121344 | C            | 0.235323 | -1.78219 | -0.85403 |
| H | 1.62949  | 3.607194 | -0.20938 | C            | -1.15063 | -2.32716 | -0.62977 |
| H | 3.835056 | -2.08727 | 0.859019 | C            | -3.45044 | -2.0544  | 0.498521 |
| H | -0.41137 | 3.864605 | -1.26982 | C            | -4.18222 | -1.35847 | 1.655587 |
| H | -0.03076 | 2.174952 | -1.5868  | C            | -4.34423 | -2.09788 | -0.75178 |
| H | -1.42104 | 1.037224 | 1.353768 | C            | 3.832343 | 2.078252 | -0.04804 |
| H | -2.44262 | 0.070394 | -1.35989 | C            | -2.29261 | 3.508731 | 0.722071 |
| H | -1.57288 | -1.33254 | 1.245586 | O            | -2.52859 | 2.535916 | -1.48607 |
| H | 3.254385 | -2.26196 | -1.562   | C            | 1.593353 | -3.57224 | 0.306054 |
| H | 2.445245 | -0.69636 | -1.48042 | O            | 4.914608 | -0.73747 | -0.27432 |
| H | 0.241143 | -0.84987 | -1.4084  | H            | 0.754408 | 0.989621 | 1.170104 |
| H | -1.65591 | -2.4483  | -1.59847 | H            | 3.911067 | 0.11356  | 1.935104 |
| H | -1.14591 | -3.31943 | -0.16012 | H            | 2.267749 | -0.48726 | 1.727474 |
| H | -3.28401 | -3.07247 | 0.818494 | H            | 0.475088 | 3.524661 | 1.132478 |
| H | -5.15963 | -1.80499 | 1.868496 | H            | 1.600595 | 3.62758  | -0.19689 |
| H | -3.60135 | -1.36139 | 2.587129 | H            | 3.838957 | -2.05373 | 0.900849 |
| H | -4.38157 | -0.27436 | 1.427081 | H            | -0.44131 | 3.872594 | -1.25751 |
| H | -5.29275 | -2.61005 | -0.52352 | H            | -0.04582 | 2.187406 | -1.58079 |
| H | -4.63631 | -1.06293 | -1.06878 | H            | -1.42524 | 1.026236 | 1.353401 |
| H | -3.8796  | -2.58012 | -1.58344 | H            | -2.44174 | 0.061102 | -1.3628  |

|              |          |          |          |              |          |          |          |
|--------------|----------|----------|----------|--------------|----------|----------|----------|
| H            | -1.56111 | -1.34356 | 1.238185 | O            | 1.146794 | 2.461029 | 1.728123 |
| H            | 3.271643 | -2.26478 | -1.53602 | C            | -0.71924 | -1.70491 | 2.565785 |
| H            | 2.471355 | -0.69271 | -1.47446 | O            | -4.60587 | -1.70167 | -0.43923 |
| H            | 0.259687 | -0.84791 | -1.4138  | H            | -0.71762 | 0.841945 | -0.89435 |
| H            | -1.63311 | -2.44589 | -1.61138 | H            | -3.53225 | -0.5779  | -2.31152 |
| H            | -1.12486 | -3.3244  | -0.17694 | H            | -1.82491 | -0.7443  | -1.92247 |
| H            | -3.26014 | -3.094   | 0.805637 | H            | -1.39888 | 2.695564 | 1.105568 |
| H            | -5.14545 | -1.84209 | 1.857534 | H            | -2.04759 | 3.503697 | -0.29474 |
| H            | -3.59066 | -1.3904  | 2.578676 | H            | -2.85224 | -2.63892 | -1.03389 |
| H            | -4.37703 | -0.30514 | 1.421177 | H            | 0.230058 | 3.365648 | -1.4068  |
| H            | -5.2711  | -2.64242 | -0.53661 | H            | 0.125691 | 4.364857 | 0.03868  |
| H            | -4.62557 | -1.08904 | -1.07707 | H            | 1.557259 | 1.268095 | -1.44082 |
| H            | -3.85756 | -2.59923 | -1.59552 | H            | 1.980581 | 0.139683 | 1.373013 |
| H            | 3.49506  | 3.048553 | -0.42004 | H            | 1.943389 | -1.13029 | -1.4414  |
| H            | 4.626816 | 2.257716 | 0.689881 | H            | -3.08105 | -2.41848 | 1.469078 |
| H            | 4.304204 | 1.531019 | -0.86983 | H            | -2.87678 | -0.6914  | 1.323238 |
| H            | -3.33081 | 3.261809 | 0.975927 | H            | -0.54758 | -2.14068 | -0.89698 |
| H            | -1.72058 | 3.519012 | 1.656154 | H            | 1.592722 | -2.43805 | 1.308951 |
| H            | -2.27303 | 4.514652 | 0.289451 | H            | 1.527131 | -3.26422 | -0.23603 |
| H            | -3.42065 | 2.23516  | -1.24412 | H            | 3.979439 | -1.5683  | 0.792997 |
| H            | 2.025267 | -3.38997 | 1.299097 | H            | 5.120273 | -3.12596 | -0.8466  |
| H            | 0.65297  | -4.10841 | 0.45333  | H            | 3.58686  | -3.77147 | -0.26098 |
| H            | 2.286883 | -4.24799 | -0.2137  | H            | 3.685276 | -3.05458 | -1.87937 |
| H            | 5.249966 | -1.4479  | -0.84451 | H            | 5.64932  | -0.75943 | -0.86269 |
| 07_1R4R10S_8 |          |          |          | H            | 4.369065 | -0.48758 | -2.05511 |
| C            | -2.78546 | 0.847447 | -0.86673 | H            | 4.420516 | 0.48684  | -0.57807 |
| C            | -1.59588 | 1.421914 | -0.62775 | H            | -4.7228  | 1.5793   | -1.46719 |
| C            | -2.80691 | -0.53766 | -1.48687 | H            | -4.70159 | 0.840572 | 0.122651 |
| C            | -1.3011  | 2.759356 | 0.010282 | H            | -4.02171 | 2.468291 | -0.09986 |
| C            | -3.17152 | -1.7055  | -0.54299 | H            | 3.434084 | 3.02618  | 0.606533 |
| C            | 0.094985 | 3.327748 | -0.31727 | H            | 2.773961 | 3.695458 | -0.90202 |
| C            | 1.324472 | 2.603721 | 0.310347 | H            | 2.390576 | 4.4676   | 0.652769 |
| C            | 1.603649 | 1.261585 | -0.35066 | H            | 0.462728 | 1.785048 | 1.864039 |
| C            | 1.913444 | 0.12672  | 0.283708 | H            | -1.28106 | -2.43425 | 3.165875 |
| C            | 2.195217 | -1.20642 | -0.37216 | H            | 0.342904 | -1.85388 | 2.76816  |
| C            | -2.56964 | -1.6446  | 0.87075  | H            | -0.99694 | -0.71305 | 2.949275 |
| C            | -1.07781 | -1.82545 | 1.100349 | H            | -4.85844 | -2.42337 | 0.159057 |
| C            | -0.18558 | -2.07672 | 0.128362 | 07_1R4R10S_9 |          |          |          |
| C            | 1.299167 | -2.31316 | 0.260313 | C            | 2.746101 | 1.18935  | 0.640665 |
| C            | 3.71258  | -1.56803 | -0.27554 | C            | 1.489228 | 1.622162 | 0.849695 |
| C            | 4.036342 | -2.96124 | -0.84282 | C            | 3.160139 | -0.16585 | 1.196056 |
| C            | 4.586463 | -0.51694 | -0.97879 | C            | 0.879006 | 2.953987 | 0.484121 |
| C            | -4.11994 | 1.477978 | -0.55355 | C            | 3.629997 | -1.25488 | 0.213087 |
| C            | 2.56045  | 3.506251 | 0.155205 | C            | -0.16231 | 2.937555 | -0.66713 |

|   |          |          |          |               |          |          |          |
|---|----------|----------|----------|---------------|----------|----------|----------|
| C | -1.62958 | 2.517248 | -0.36101 | H             | -2.252   | 4.537564 | 0.140812 |
| C | -1.69446 | 1.129219 | 0.244629 | H             | -1.88097 | 2.049148 | -2.24736 |
| C | -2.1833  | 0.031252 | -0.33734 | H             | 1.932887 | -3.40726 | 1.277772 |
| C | -2.11015 | -1.3542  | 0.259623 | H             | 0.553273 | -4.10704 | 0.428082 |
| C | 2.629292 | -1.60436 | -0.9075  | H             | 2.185928 | -4.26101 | -0.239   |
| C | 1.339513 | -2.28864 | -0.4852  | H             | 5.177568 | -1.52628 | -0.95419 |
| C | 0.159365 | -1.76704 | -0.86077 | 07_1R4R10S_10 |          |          |          |
| C | -1.23431 | -2.28871 | -0.62887 | C             | 2.719391 | 1.264254 | 0.569826 |
| C | -3.50777 | -1.98184 | 0.549352 | C             | 1.442687 | 1.675021 | 0.680187 |
| C | -4.22088 | -1.23527 | 1.686696 | C             | 3.123866 | -0.06699 | 1.18752  |
| C | -4.42138 | -2.07751 | -0.68385 | C             | 0.832411 | 2.984356 | 0.242942 |
| C | 3.827826 | 1.997427 | -0.03683 | C             | 3.658076 | -1.17567 | 0.260961 |
| C | -2.32459 | 3.528552 | 0.560732 | C             | -0.32199 | 2.888977 | -0.78484 |
| O | -2.36154 | 2.58718  | -1.5968  | C             | -1.73508 | 2.48721  | -0.28522 |
| C | 1.499463 | -3.58039 | 0.283714 | C             | -1.75614 | 1.094345 | 0.317188 |
| O | 4.876164 | -0.826   | -0.35324 | C             | -2.11903 | -0.02062 | -0.32425 |
| H | 0.823455 | 0.935123 | 1.36779  | C             | -2.04863 | -1.41265 | 0.255357 |
| H | 3.98768  | -0.01943 | 1.906547 | C             | 2.703433 | -1.58297 | -0.87996 |
| H | 2.32596  | -0.58744 | 1.769015 | C             | 1.420387 | -2.2859  | -0.4695  |
| H | 0.414685 | 3.389925 | 1.38059  | C             | 0.235501 | -1.78205 | -0.85391 |
| H | 1.666408 | 3.656312 | 0.193495 | C             | -1.15041 | -2.32711 | -0.62969 |
| H | 3.812974 | -2.15771 | 0.81667  | C             | -3.45027 | -2.05465 | 0.498465 |
| H | -0.2241  | 3.946794 | -1.0943  | C             | -4.18208 | -1.3591  | 1.655741 |
| H | 0.214676 | 2.280582 | -1.46389 | C             | -4.34411 | -2.09784 | -0.75183 |
| H | -1.26687 | 1.045455 | 1.242811 | C             | 3.832132 | 2.07825  | -0.04812 |
| H | -2.62926 | 0.11273  | -1.32878 | C             | -2.29287 | 3.508705 | 0.721938 |
| H | -1.59702 | -1.27294 | 1.228581 | O             | -2.52856 | 2.535658 | -1.48618 |
| H | 3.161992 | -2.27999 | -1.59897 | C             | 1.593757 | -3.57248 | 0.305354 |
| H | 2.404054 | -0.69181 | -1.47065 | O             | 4.914619 | -0.73726 | -0.27382 |
| H | 0.194237 | -0.8301  | -1.41533 | H             | 0.75418  | 0.989927 | 1.170221 |
| H | -1.7242  | -2.40349 | -1.6073  | H             | 3.910537 | 0.113631 | 1.935409 |
| H | -1.22235 | -3.28444 | -0.17188 | H             | 2.267262 | -0.4872  | 1.727323 |
| H | -3.31426 | -3.00803 | 0.897337 | H             | 0.474949 | 3.524966 | 1.132405 |
| H | -5.17728 | -1.7137  | 1.929372 | H             | 1.600452 | 3.627735 | -0.19699 |
| H | -3.61159 | -1.22137 | 2.598734 | H             | 3.838703 | -2.05363 | 0.900966 |
| H | -4.42605 | -0.19521 | 1.407066 | H             | -0.44155 | 3.872674 | -1.25753 |
| H | -5.34831 | -2.60421 | -0.42792 | H             | -0.04591 | 2.187498 | -1.58077 |
| H | -4.70214 | -1.08382 | -1.05288 | H             | -1.42528 | 1.02631  | 1.353544 |
| H | -3.95179 | -2.62379 | -1.50932 | H             | -2.44168 | 0.061088 | -1.36264 |
| H | 3.482787 | 2.982258 | -0.36119 | H             | -1.5611  | -1.34368 | 1.238343 |
| H | 4.678885 | 2.142392 | 0.643032 | H             | 3.271949 | -2.26429 | -1.5362  |
| H | 4.225751 | 1.46271  | -0.90476 | H             | 2.471406 | -0.69234 | -1.47436 |
| H | -3.38287 | 3.268116 | 0.662051 | H             | 0.259795 | -0.84759 | -1.41338 |
| H | -1.87638 | 3.532123 | 1.559061 | H             | -1.63289 | -2.44578 | -1.61131 |



|               |          |          |          |               |          |          |          |
|---------------|----------|----------|----------|---------------|----------|----------|----------|
| H             | -1.12458 | -3.32437 | -0.17692 | H             | 2.32636  | -0.58752 | 1.76924  |
| H             | -3.25991 | -3.09434 | 0.805287 | H             | 0.415    | 3.389692 | 1.380755 |
| H             | -5.14528 | -1.84284 | 1.857567 | H             | 1.666785 | 3.656172 | 0.193749 |
| H             | -3.59049 | -1.39125 | 2.57881  | H             | 3.812791 | -2.15811 | 0.816606 |
| H             | -4.37695 | -0.30572 | 1.421633 | H             | -0.22359 | 3.946732 | -1.09422 |
| H             | -5.27093 | -2.6425  | -0.53674 | H             | 0.214999 | 2.280468 | -1.46377 |
| H             | -4.62554 | -1.08893 | -1.07681 | H             | -1.26657 | 1.045342 | 1.242743 |
| H             | -3.85744 | -2.59894 | -1.59571 | H             | -2.62954 | 0.113111 | -1.32872 |
| H             | 3.495057 | 3.048978 | -0.41918 | H             | -1.59716 | -1.27297 | 1.228377 |
| H             | 4.627232 | 2.256701 | 0.689356 | H             | 3.161495 | -2.28038 | -1.59893 |
| H             | 4.303193 | 1.531397 | -0.87065 | H             | 2.403914 | -0.69202 | -1.47062 |
| H             | -3.33101 | 3.261593 | 0.975909 | H             | 0.194131 | -0.83037 | -1.41606 |
| H             | -1.72077 | 3.519143 | 1.655973 | H             | -1.72462 | -2.40311 | -1.60765 |
| H             | -2.27353 | 4.514601 | 0.289245 | H             | -1.22283 | -3.28435 | -0.17238 |
| H             | -3.42099 | 2.236182 | -1.24403 | H             | -3.31458 | -3.00786 | 0.897027 |
| H             | 2.024604 | -3.39037 | 1.2989   | H             | -5.17737 | -1.71344 | 1.929427 |
| H             | 0.653608 | -4.10937 | 0.45148  | H             | -3.61156 | -1.22142 | 2.598714 |
| H             | 2.288254 | -4.24751 | -0.21403 | H             | -4.42599 | -0.19498 | 1.407261 |
| H             | 5.250048 | -1.44759 | -0.84411 | H             | -5.34871 | -2.60365 | -0.42795 |
| 07_1R4R10S_11 |          |          |          | H             | -4.70247 | -1.08322 | -1.05277 |
| C             | 2.746392 | 1.189096 | 0.640593 | H             | -3.95232 | -2.6232  | -1.50952 |
| C             | 1.489567 | 1.621985 | 0.84978  | H             | 3.483089 | 2.981939 | -0.36138 |
| C             | 3.160429 | -0.16609 | 1.195996 | H             | 4.679282 | 2.141936 | 0.642606 |
| C             | 0.879358 | 2.953833 | 0.484269 | H             | 4.225794 | 1.462318 | -0.90511 |
| C             | 3.629898 | -1.25527 | 0.213002 | H             | -3.38241 | 3.268426 | 0.662166 |
| C             | -0.16193 | 2.937493 | -0.66703 | H             | -1.87593 | 3.532073 | 1.559298 |
| C             | -1.62923 | 2.517372 | -0.36089 | H             | -2.2513  | 4.537749 | 0.141148 |
| C             | -1.69428 | 1.129299 | 0.244631 | H             | -1.88082 | 2.049332 | -2.24723 |
| C             | -2.18341 | 0.031469 | -0.33737 | H             | 1.932052 | -3.40652 | 1.278495 |
| C             | -2.11036 | -1.35406 | 0.259448 | H             | 0.552557 | -4.10655 | 0.428829 |
| C             | 2.629006 | -1.60459 | -0.90744 | H             | 2.185331 | -4.26092 | -0.23788 |
| C             | 1.339103 | -2.28858 | -0.48504 | H             | 5.177115 | -1.52689 | -0.95471 |
| C             | 0.159072 | -1.76706 | -0.86109 | 07_1R4R10S_12 |          |          |          |
| C             | -1.23468 | -2.28855 | -0.62922 | C             | -2.7746  | 1.27298  | -0.07325 |
| C             | -3.50801 | -1.9816  | 0.549205 | C             | -1.47872 | 1.449068 | -0.38162 |
| C             | -4.22093 | -1.23511 | 1.686727 | C             | -3.17976 | 0.051917 | 0.737377 |
| C             | -4.42177 | -2.077   | -0.68391 | C             | -0.81502 | 2.496559 | -1.23644 |
| C             | 3.828079 | 1.997068 | -0.0371  | C             | -3.64339 | -1.15406 | -0.11153 |
| C             | -2.32408 | 3.528697 | 0.56094  | C             | 0.253851 | 3.36232  | -0.52252 |
| O             | -2.36123 | 2.58749  | -1.59666 | C             | 1.288426 | 2.624175 | 0.374424 |
| C             | 1.498812 | -3.58003 | 0.284424 | C             | 1.806536 | 1.358374 | -0.29483 |
| O             | 4.876088 | -0.82666 | -0.35351 | C             | 1.900617 | 0.160043 | 0.289018 |
| H             | 0.82383  | 0.934986 | 1.367974 | C             | 2.377671 | -1.11746 | -0.36293 |
| H             | 3.988187 | -0.01971 | 1.906244 | C             | -2.53138 | -1.84776 | -0.92694 |

|   |          |          |          |               |          |          |          |
|---|----------|----------|----------|---------------|----------|----------|----------|
| C | -1.25914 | -2.27703 | -0.209   | H             | -4.96332 | -1.71497 | 1.220931 |
| C | -0.0652  | -1.85891 | -0.66856 | 07_1R4R10S_13 |          |          |          |
| C | 1.313183 | -2.23473 | -0.1748  | C             | -2.75315 | 1.020101 | -0.74868 |
| C | 3.772245 | -1.5482  | 0.189971 | C             | -1.52703 | 1.455308 | -0.41683 |
| C | 4.248992 | -2.89829 | -0.37291 | C             | -2.87096 | -0.32683 | -1.43981 |
| C | 4.839877 | -0.47592 | -0.07946 | C             | -1.11631 | 2.720067 | 0.295384 |
| C | -3.90055 | 2.184305 | -0.49581 | C             | -3.31734 | -1.52075 | -0.55745 |
| C | 2.462147 | 3.568947 | 0.677988 | C             | 0.269883 | 3.260498 | -0.12078 |
| O | 0.707895 | 2.341081 | 1.658955 | C             | 1.521233 | 2.450343 | 0.336532 |
| C | -1.41991 | -3.24863 | 0.93701  | C             | 1.654247 | 1.131426 | -0.40959 |
| O | -4.25225 | -2.14891 | 0.722534 | C             | 1.924783 | -0.05904 | 0.135951 |
| H | -0.79804 | 0.675699 | -0.03304 | C             | 2.020652 | -1.36279 | -0.62434 |
| H | -2.35301 | -0.27526 | 1.37749  | C             | -2.66856 | -1.61263 | 0.827406 |
| H | -4.0109  | 0.322001 | 1.4064   | C             | -1.1841  | -1.89278 | 0.983115 |
| H | -0.32354 | 1.973716 | -2.07046 | C             | -0.34811 | -2.17298 | -0.03045 |
| H | -1.54914 | 3.170227 | -1.69172 | C             | 1.132071 | -2.46133 | 0.031285 |
| H | -4.38885 | -0.8008  | -0.84314 | C             | 3.490794 | -1.85985 | -0.80272 |
| H | 0.793805 | 3.925387 | -1.29503 | C             | 4.281616 | -0.94108 | -1.745   |
| H | -0.23659 | 4.10261  | 0.121698 | C             | 4.248377 | -2.05209 | 0.521362 |
| H | 2.115841 | 1.477765 | -1.33519 | C             | -4.04082 | 1.755522 | -0.47144 |
| H | 1.593761 | 0.073318 | 1.332696 | C             | 2.778746 | 3.299579 | 0.085471 |
| H | 2.493637 | -0.93602 | -1.44323 | O             | 1.488729 | 2.248412 | 1.757359 |
| H | -2.26528 | -1.17919 | -1.75249 | C             | -0.75893 | -1.82836 | 2.43441  |
| H | -3.00466 | -2.73274 | -1.37858 | O             | -4.72719 | -1.46262 | -0.27877 |
| H | -0.06753 | -1.19436 | -1.53392 | H             | -0.70276 | 0.793264 | -0.66243 |
| H | 1.287611 | -2.5175  | 0.88546  | H             | -3.58597 | -0.26274 | -2.27596 |
| H | 1.6502   | -3.12847 | -0.71767 | H             | -1.90649 | -0.58028 | -1.89077 |
| H | 3.670053 | -1.65548 | 1.281381 | H             | -1.85332 | 3.515454 | 0.131289 |
| H | 5.266858 | -3.11458 | -0.02753 | H             | -1.11034 | 2.560848 | 1.385903 |
| H | 3.614761 | -3.73375 | -0.06166 | H             | -3.10284 | -2.44277 | -1.12211 |
| H | 4.270203 | -2.88071 | -1.47085 | H             | 0.305369 | 3.373682 | -1.21269 |
| H | 5.800827 | -0.76893 | 0.359552 | H             | 0.37836  | 4.266512 | 0.303098 |
| H | 4.995279 | -0.34414 | -1.15883 | H             | 1.510124 | 1.201243 | -1.48909 |
| H | 4.55689  | 0.494848 | 0.337246 | H             | 2.080028 | -0.11445 | 1.213726 |
| H | -4.67574 | 1.62755  | -1.03967 | H             | 1.630753 | -1.19051 | -1.63866 |
| H | -4.39392 | 2.621538 | 0.383429 | H             | -3.22084 | -2.39139 | 1.374666 |
| H | -3.56783 | 3.004519 | -1.13656 | H             | -2.89494 | -0.67802 | 1.35969  |
| H | 3.125562 | 3.107454 | 1.416246 | H             | -0.75587 | -2.19698 | -1.04058 |
| H | 3.041313 | 3.778433 | -0.22727 | H             | 1.459735 | -2.62206 | 1.062937 |
| H | 2.092512 | 4.517385 | 1.084348 | H             | 1.327274 | -3.404   | -0.50167 |
| H | -0.14504 | 1.903048 | 1.498321 | H             | 3.417767 | -2.84501 | -1.28794 |
| H | -1.88653 | -4.17836 | 0.581993 | H             | 5.290575 | -1.33494 | -1.91647 |
| H | -0.46692 | -3.5114  | 1.402639 | H             | 3.787519 | -0.84853 | -2.72005 |
| H | -2.09273 | -2.85246 | 1.703886 | H             | 4.380834 | 0.066036 | -1.32378 |

|               |          |          |          |               |          |          |          |
|---------------|----------|----------|----------|---------------|----------|----------|----------|
| H             | 5.241055 | -2.47732 | 0.332057 | H             | 0.009793 | 2.10509  | -1.73007 |
| H             | 4.394587 | -1.09719 | 1.040364 | H             | -1.30707 | 1.10278  | 1.304366 |
| H             | 3.725824 | -2.7306  | 1.204673 | H             | -2.49744 | 0.12191  | -1.33511 |
| H             | -3.88317 | 2.706501 | 0.044788 | H             | -1.59607 | -1.24889 | 1.277686 |
| H             | -4.57854 | 1.962682 | -1.40808 | H             | 3.088568 | -2.32567 | -1.71114 |
| H             | -4.71128 | 1.137413 | 0.137552 | H             | 2.30709  | -0.74911 | -1.55576 |
| H             | 3.668272 | 2.75931  | 0.423564 | H             | 0.122202 | -0.89781 | -1.45427 |
| H             | 2.890738 | 3.52273  | -0.9807  | H             | -1.81634 | -2.45939 | -1.51974 |
| H             | 2.712119 | 4.245846 | 0.633798 | H             | -1.2729  | -3.28637 | -0.067   |
| H             | 0.778909 | 1.611874 | 1.941843 | H             | -3.38718 | -2.92765 | 0.955121 |
| H             | -1.36743 | -2.50861 | 3.046048 | H             | -5.1782  | -1.55393 | 2.018357 |
| H             | 0.290084 | -2.08374 | 2.594702 | H             | -3.58265 | -1.15257 | 2.677886 |
| H             | -0.92462 | -0.82035 | 2.839767 | H             | -4.35375 | -0.06996 | 1.507814 |
| H             | -5.1864  | -1.39426 | -1.1311  | H             | -5.41827 | -2.41873 | -0.3399  |
| 07_1R4R10S_14 |          |          |          | H             | -4.70971 | -0.92327 | -0.95902 |
| C             | 2.796657 | 1.103157 | 0.730159 | H             | -4.03816 | -2.49066 | -1.44025 |
| C             | 1.535414 | 1.462926 | 0.435866 | H             | 3.775064 | 2.990363 | 0.217254 |
| C             | 3.097612 | -0.32419 | 1.166384 | H             | 4.24362  | 2.309743 | 1.779879 |
| C             | 1.01791  | 2.830727 | 0.053487 | H             | 4.861378 | 1.585316 | 0.306155 |
| C             | 3.607121 | -1.2966  | 0.074344 | H             | -3.08337 | 3.441957 | 0.938507 |
| C             | -0.17686 | 2.827564 | -0.9263  | H             | -1.43056 | 3.623552 | 1.535702 |
| C             | -1.59509 | 2.532178 | -0.3654  | H             | -1.98711 | 4.605473 | 0.160879 |
| C             | -1.68238 | 1.16153  | 0.282397 | H             | -3.32831 | 2.369388 | -1.25629 |
| C             | -2.13699 | 0.051706 | -0.30844 | H             | 1.964277 | -3.42197 | 1.225966 |
| C             | -2.11674 | -1.32518 | 0.312349 | H             | 0.536429 | -4.12866 | 0.463247 |
| C             | 2.566795 | -1.66256 | -1.00471 | H             | 2.132811 | -4.31188 | -0.28162 |
| C             | 1.292471 | -2.33967 | -0.52948 | H             | 4.543155 | -0.11159 | -1.16594 |
| C             | 0.101697 | -1.81761 | -0.87052 | 07_1R4R10S_15 |          |          |          |
| C             | -1.28803 | -2.31123 | -0.5662  | C             | -2.4968  | 1.64898  | -0.10077 |
| C             | -3.53823 | -1.89082 | 0.61839  | C             | -1.16387 | 1.800152 | -0.04371 |
| C             | -4.20043 | -1.12309 | 1.772097 | C             | -3.16658 | 0.622653 | 0.792109 |
| C             | -4.47134 | -1.93275 | -0.60287 | C             | -0.28842 | 2.672139 | -0.90628 |
| C             | 3.973564 | 2.053215 | 0.744916 | C             | -3.89837 | -0.5039  | 0.045449 |
| C             | -2.04558 | 3.617259 | 0.629236 | C             | 0.956917 | 3.268739 | -0.22003 |
| O             | -2.42673 | 2.597776 | -1.53859 | C             | 1.960767 | 2.287654 | 0.446724 |
| C             | 1.478745 | -3.6145  | 0.259802 | C             | 2.115747 | 1.002852 | -0.34988 |
| O             | 4.804404 | -0.82434 | -0.56034 | C             | 1.838975 | -0.22481 | 0.100923 |
| H             | 0.78079  | 0.683745 | 0.500794 | C             | 1.976554 | -1.51164 | -0.68003 |
| H             | 3.860979 | -0.3004  | 1.955842 | C             | -3.00777 | -1.37811 | -0.87085 |
| H             | 2.199219 | -0.77232 | 1.607752 | C             | -1.77929 | -2.04747 | -0.27656 |
| H             | 0.7397   | 3.388037 | 0.961457 | C             | -0.56743 | -1.80779 | -0.80828 |
| H             | 1.819901 | 3.420984 | -0.40502 | C             | 0.755749 | -2.43487 | -0.43476 |
| H             | 3.924433 | -2.21252 | 0.585664 | C             | 3.317418 | -2.26131 | -0.39401 |
| H             | -0.24163 | 3.815006 | -1.40079 | C             | 4.513649 | -1.52902 | -1.01819 |

|               |          |          |          |   |          |          |          |
|---------------|----------|----------|----------|---|----------|----------|----------|
| C             | 3.572353 | -2.52577 | 1.09892  | C | -1.09827 | 2.726697 | 0.286716 |
| C             | -3.41161 | 2.437261 | -1.01052 | C | -3.32565 | -1.50356 | -0.58397 |
| C             | 3.330466 | 2.98365  | 0.581731 | C | 0.290684 | 3.261559 | -0.12624 |
| O             | 1.444407 | 2.031196 | 1.764164 | C | 1.537442 | 2.446826 | 0.334689 |
| C             | -2.02795 | -3.0418  | 0.834508 | C | 1.665633 | 1.12691  | -0.40993 |
| O             | -4.56806 | -1.26551 | 1.061172 | C | 1.927261 | -0.06451 | 0.137598 |
| H             | -0.62452 | 1.177635 | 0.663362 | C | 2.017254 | -1.3692  | -0.62142 |
| H             | -2.42634 | 0.16926  | 1.46068  | C | -2.68289 | -1.60192 | 0.80908  |
| H             | -3.92028 | 1.109534 | 1.428916 | C | -1.19863 | -1.88441 | 0.976309 |
| H             | 0.05528  | 2.072221 | -1.7634  | C | -0.3594  | -2.16131 | -0.03536 |
| H             | -0.85996 | 3.500811 | -1.34168 | C | 1.118287 | -2.4603  | 0.031822 |
| H             | -4.65959 | -0.05169 | -0.61078 | C | 3.484373 | -1.87714 | -0.79339 |
| H             | 1.503218 | 3.84404  | -0.97802 | C | 4.28547  | -0.96493 | -1.73334 |
| H             | 0.65849  | 3.980615 | 0.559185 | C | 4.235247 | -2.07351 | 0.533938 |
| H             | 2.483001 | 1.132762 | -1.36937 | C | -4.03033 | 1.770614 | -0.43326 |
| H             | 1.456605 | -0.32722 | 1.116287 | C | 2.799321 | 3.290157 | 0.085997 |
| H             | 1.986862 | -1.26016 | -1.75122 | O | 1.500666 | 2.245893 | 1.75566  |
| H             | -2.70097 | -0.75462 | -1.71923 | C | -0.78143 | -1.82902 | 2.430074 |
| H             | -3.66647 | -2.15689 | -1.29307 | O | -4.75049 | -1.38602 | -0.4307  |
| H             | -0.51567 | -1.09839 | -1.63563 | H | -0.69747 | 0.80961  | -0.69974 |
| H             | 0.747619 | -2.75438 | 0.61353  | H | -3.61779 | -0.23129 | -2.26558 |
| H             | 0.909323 | -3.35115 | -1.02728 | H | -1.92552 | -0.55503 | -1.91391 |
| H             | 3.231022 | -3.23756 | -0.89488 | H | -1.83029 | 3.527113 | 0.124437 |
| H             | 5.442069 | -2.08965 | -0.85614 | H | -1.09461 | 2.564998 | 1.376942 |
| H             | 4.383699 | -1.4009  | -2.09982 | H | -3.10324 | -2.42002 | -1.15412 |
| H             | 4.641672 | -0.53388 | -0.57614 | H | 0.329385 | 3.374124 | -1.21811 |
| H             | 4.483364 | -3.12144 | 1.229767 | H | 0.402209 | 4.267366 | 0.297374 |
| H             | 3.710697 | -1.58704 | 1.648993 | H | 1.525863 | 1.196674 | -1.48997 |
| H             | 2.750391 | -3.07428 | 1.57208  | H | 2.078654 | -0.12007 | 1.215918 |
| H             | -3.78718 | 1.826874 | -1.84389 | H | 1.632466 | -1.19511 | -1.63731 |
| H             | -4.29518 | 2.789214 | -0.46101 | H | -3.22503 | -2.39131 | 1.358119 |
| H             | -2.91877 | 3.3099   | -1.44751 | H | -2.91766 | -0.67258 | 1.346586 |
| H             | 4.025285 | 2.353743 | 1.150848 | H | -0.76241 | -2.17538 | -1.0475  |
| H             | 3.780191 | 3.176563 | -0.39865 | H | 1.440982 | -2.62309 | 1.064722 |
| H             | 3.217855 | 3.938653 | 1.107132 | H | 1.307557 | -3.40479 | -0.5001  |
| H             | 2.092711 | 1.469803 | 2.221076 | H | 3.406258 | -2.86221 | -1.27801 |
| H             | -2.64537 | -3.87502 | 0.466634 | H | 5.292316 | -1.36607 | -1.90021 |
| H             | -1.10541 | -3.47069 | 1.233415 | H | 3.796044 | -0.86998 | -2.71049 |
| H             | -2.59144 | -2.58523 | 1.654037 | H | 4.390028 | 0.041928 | -1.31278 |
| H             | -5.03612 | -1.99254 | 0.620073 | H | 5.225499 | -2.50627 | 0.349102 |
| 07_1R4R10S_16 |          |          |          | H | 4.386455 | -1.11913 | 1.052463 |
| C             | -2.75051 | 1.033686 | -0.74164 | H | 3.705022 | -2.74739 | 1.215948 |
| C             | -1.51821 | 1.46699  | -0.43045 | H | -3.85773 | 2.72215  | 0.077414 |
| C             | -2.88406 | -0.30336 | -1.4508  | H | -4.59081 | 1.974872 | -1.3565  |

|               |          |          |          |               |          |          |          |
|---------------|----------|----------|----------|---------------|----------|----------|----------|
| H             | -4.68834 | 1.155047 | 0.191381 | H             | 2.102556 | -1.06128 | -1.50371 |
| H             | 3.685703 | 2.746394 | 0.426793 | H             | -0.05826 | -0.73241 | -1.61138 |
| H             | 2.914918 | 3.51176  | -0.9801  | H             | -2.30532 | -1.75456 | -1.94598 |
| H             | 2.735446 | 4.237282 | 0.633181 | H             | -2.03185 | -2.89184 | -0.63388 |
| H             | 0.786566 | 1.613642 | 1.938437 | H             | -4.43616 | -0.83132 | -0.82955 |
| H             | -1.3944  | -2.51063 | 3.035948 | H             | -5.46929 | -2.56501 | 0.691885 |
| H             | 0.266059 | -2.08825 | 2.594397 | H             | -4.12521 | -3.21835 | -0.24614 |
| H             | -0.94587 | -0.82235 | 2.839335 | H             | -3.89393 | -2.80348 | 1.461943 |
| H             | -5.04726 | -2.12277 | 0.127647 | H             | -5.69068 | -0.18491 | 1.219501 |
| 07_1R4R10S_17 |          |          |          | H             | -4.20572 | -0.26813 | 2.181106 |
| C             | 3.42549  | 0.881704 | 0.228985 | H             | -4.37313 | 0.96566  | 0.924702 |
| C             | 2.136863 | 1.250766 | 0.342208 | H             | 5.266242 | 1.773791 | 0.930091 |
| C             | 3.894889 | -0.56448 | 0.291711 | H             | 5.174109 | 1.592705 | -0.81651 |
| C             | 1.5817   | 2.655294 | 0.378554 | H             | 4.274133 | 2.889088 | -0.01775 |
| C             | 2.846135 | -1.67796 | 0.430125 | H             | -2.40648 | 3.78926  | 1.169009 |
| C             | 0.464049 | 2.953259 | -0.65688 | H             | -0.78766 | 3.61636  | 1.851465 |
| C             | -1.00839 | 2.820849 | -0.19058 | H             | -1.09219 | 4.845369 | 0.602299 |
| C             | -1.34967 | 1.413696 | 0.268704 | H             | -2.69828 | 3.127437 | -1.12843 |
| C             | -2.12109 | 0.551316 | -0.39985 | H             | 1.057943 | -3.8085  | 0.927104 |
| C             | -2.456   | -0.8586  | 0.026862 | H             | -0.52602 | -4.0517  | 0.159435 |
| C             | 2.105108 | -1.96928 | -0.89236 | H             | 0.963605 | -4.58298 | -0.6409  |
| C             | 0.678823 | -2.44975 | -0.70625 | H             | 3.846903 | -2.77443 | 1.712213 |
| C             | -0.33083 | -1.66919 | -1.12682 | 07_1R4R10S_18 |          |          |          |
| C             | -1.81279 | -1.875   | -0.96815 | C             | -2.62532 | 1.480891 | 0.021636 |
| C             | -3.99628 | -1.05452 | 0.155392 | C             | -1.32605 | 1.557457 | -0.31321 |
| C             | -4.38709 | -2.49381 | 0.530872 | C             | -3.11636 | 0.268796 | 0.796734 |
| C             | -4.60077 | -0.07508 | 1.174648 | C             | -0.59269 | 2.583775 | -1.13739 |
| C             | 4.581545 | 1.84558  | 0.073256 | C             | -3.73868 | -0.83871 | -0.07337 |
| C             | -1.33702 | 3.828572 | 0.928077 | C             | 0.58402  | 3.302748 | -0.42988 |
| O             | -1.75726 | 3.177416 | -1.36577 | C             | 1.581469 | 2.425198 | 0.379168 |
| C             | 0.51807  | -3.78791 | -0.02643 | C             | 1.941147 | 1.153579 | -0.37595 |
| O             | 3.484309 | -2.90562 | 0.821122 | C             | 1.921457 | -0.07916 | 0.140304 |
| H             | 1.383362 | 0.47145  | 0.439025 | C             | 2.209749 | -1.35694 | -0.6119  |
| H             | 4.585031 | -0.64769 | 1.147851 | C             | -2.74259 | -1.60443 | -0.98001 |
| H             | 4.516836 | -0.78426 | -0.58995 | C             | -1.49677 | -2.20274 | -0.34485 |
| H             | 1.202601 | 2.85578  | 1.391435 | C             | -0.28432 | -1.88272 | -0.83264 |
| H             | 2.384834 | 3.38101  | 0.227222 | C             | 1.070545 | -2.38889 | -0.39288 |
| H             | 2.118272 | -1.39309 | 1.20373  | C             | 3.605352 | -1.96991 | -0.27475 |
| H             | 0.572691 | 3.986906 | -1.00789 | C             | 4.741496 | -1.1177  | -0.85835 |
| H             | 0.591056 | 2.312019 | -1.53659 | C             | 3.832338 | -2.20855 | 1.22725  |
| H             | -0.92587 | 1.119968 | 1.229926 | C             | -3.67484 | 2.507947 | -0.32516 |
| H             | -2.52655 | 0.858661 | -1.36583 | C             | 2.85321  | 3.238379 | 0.66881  |
| H             | -2.00871 | -1.04066 | 1.015673 | O             | 1.033339 | 2.129845 | 1.674866 |
| H             | 2.708323 | -2.718   | -1.42631 | C             | -1.71538 | -3.20689 | 0.763066 |

|               |          |          |          |   |          |          |          |
|---------------|----------|----------|----------|---|----------|----------|----------|
| O             | -4.42389 | -1.70456 | 0.842627 | C | 1.939283 | -0.05235 | 0.161237 |
| H             | -0.71221 | 0.708385 | -0.02021 | C | 2.045546 | -1.33181 | -0.63514 |
| H             | -2.29678 | -0.16886 | 1.377153 | C | -2.59913 | -1.56775 | 0.87336  |
| H             | -3.88935 | 0.572763 | 1.514556 | C | -1.11012 | -1.84133 | 0.998207 |
| H             | -0.19037 | 2.067159 | -2.02152 | C | -0.31045 | -2.16598 | -0.03048 |
| H             | -1.27401 | 3.350822 | -1.52143 | C | 1.170677 | -2.453   | 0.000489 |
| H             | -4.47994 | -0.37994 | -0.74872 | C | 3.518145 | -1.80978 | -0.83908 |
| H             | 1.142361 | 3.854505 | -1.19744 | C | 4.29299  | -0.85222 | -1.75579 |
| H             | 0.194601 | 4.049917 | 0.27299  | C | 4.286774 | -2.03869 | 0.472656 |
| H             | 2.216315 | 1.297321 | -1.42279 | C | -4.0392  | 1.610352 | -0.30333 |
| H             | 1.643373 | -0.18524 | 1.188907 | C | 2.027282 | 3.602292 | -0.34799 |
| H             | 2.228562 | -1.12006 | -1.68641 | O | 2.130372 | 2.326817 | 1.712945 |
| H             | -2.44363 | -0.92498 | -1.78614 | C | -0.63679 | -1.71337 | 2.429704 |
| H             | -3.32193 | -2.40946 | -1.46418 | O | -4.7178  | -1.5049  | -0.29941 |
| H             | -0.25266 | -1.18147 | -1.6682  | H | -0.75694 | 0.930826 | -1.24923 |
| H             | 1.046636 | -2.68806 | 0.661248 | H | -3.72291 | -0.39649 | -2.215   |
| H             | 1.330878 | -3.29741 | -0.95954 | H | -2.00289 | -0.67073 | -1.96479 |
| H             | 3.635584 | -2.94945 | -0.77569 | H | -0.73248 | 3.487944 | -1.024   |
| H             | 5.716888 | -1.578   | -0.66038 | H | -1.95759 | 3.367553 | 0.217571 |
| H             | 4.637973 | -1.0047  | -1.94459 | H | -3.05595 | -2.51316 | -1.02125 |
| H             | 4.747665 | -0.11423 | -0.41668 | H | 0.002573 | 3.637201 | 1.455038 |
| H             | 4.790777 | -2.71522 | 1.390774 | H | -0.31498 | 1.90887  | 1.574987 |
| H             | 3.861899 | -1.26195 | 1.779794 | H | 1.395078 | 1.220825 | -1.41094 |
| H             | 3.050393 | -2.83334 | 1.672958 | H | 2.132422 | -0.1237  | 1.231752 |
| H             | -4.50783 | 2.050529 | -0.87608 | H | 1.644658 | -1.13665 | -1.64096 |
| H             | -4.10883 | 2.938357 | 0.587876 | H | -3.11633 | -2.31573 | 1.498976 |
| H             | -3.28505 | 3.329138 | -0.93175 | H | -2.81244 | -0.6036  | 1.355706 |
| H             | 3.501218 | 2.680473 | 1.352031 | H | -0.74916 | -2.22298 | -1.02602 |
| H             | 3.409239 | 3.437363 | -0.25323 | H | 1.512987 | -2.64073 | 1.022886 |
| H             | 2.59519  | 4.196171 | 1.134967 | H | 1.360868 | -3.37934 | -0.56145 |
| H             | 0.133253 | 1.790081 | 1.535673 | H | 3.451418 | -2.77912 | -1.35602 |
| H             | -2.28791 | -4.06722 | 0.386167 | H | 5.306929 | -1.22554 | -1.94288 |
| H             | -0.77836 | -3.5911  | 1.173423 | H | 3.793497 | -0.73646 | -2.72551 |
| H             | -2.31161 | -2.78154 | 1.576482 | H | 4.378323 | 0.143314 | -1.30466 |
| H             | -4.78469 | -2.44587 | 0.330211 | H | 5.283402 | -2.4446  | 0.262861 |
| 07_1R4R10S_19 |          |          |          | H | 4.424955 | -1.10116 | 1.024736 |
| C             | -2.77826 | 0.964253 | -0.82532 | H | 3.776853 | -2.74651 | 1.135287 |
| C             | -1.55466 | 1.519996 | -0.80506 | H | -3.85417 | 2.562703 | 0.200552 |
| C             | -2.93312 | -0.41175 | -1.45021 | H | -4.7381  | 1.799531 | -1.13076 |
| C             | -1.10748 | 2.834931 | -0.22147 | H | -4.5648  | 0.942912 | 0.387756 |
| C             | -3.29472 | -1.57368 | -0.49732 | H | 3.089114 | 3.427797 | -0.56101 |
| C             | -0.02427 | 2.703467 | 0.878137 | H | 1.518479 | 3.73888  | -1.30859 |
| C             | 1.441715 | 2.423928 | 0.451285 | H | 1.938342 | 4.529106 | 0.228506 |
| C             | 1.594194 | 1.136979 | -0.34227 | H | 3.050502 | 2.087637 | 1.510873 |

|               |          |          |          |               |          |          |          |
|---------------|----------|----------|----------|---------------|----------|----------|----------|
| H             | -1.23881 | -2.34637 | 3.096275 | H             | -5.7184  | -1.6089  | -0.36454 |
| H             | 0.41169  | -1.98332 | 2.568154 | H             | -4.65056 | -0.53141 | -1.27017 |
| H             | -0.76264 | -0.68091 | 2.783703 | H             | -4.37849 | -2.28282 | -1.29584 |
| H             | -4.96294 | -2.22021 | 0.309583 | H             | -4.92341 | -2.76094 | 1.765531 |
| 07_1R4R10S_20 |          |          |          | H             | -3.57482 | -3.49108 | 0.891316 |
| C             | 2.860685 | 0.880541 | 0.662689 | H             | -3.2661  | -2.52503 | 2.345314 |
| C             | 1.680374 | 1.479304 | 0.905263 | H             | 3.839837 | 2.585234 | -0.28747 |
| C             | 3.08304  | -0.54265 | 1.149805 | H             | 4.909326 | 1.552098 | 0.673522 |
| C             | 1.261302 | 2.895101 | 0.589262 | H             | 4.350457 | 0.995196 | -0.89304 |
| C             | 3.389526 | -1.64062 | 0.104379 | H             | -2.91614 | 3.793659 | 0.817217 |
| C             | 0.221255 | 3.059123 | -0.55131 | H             | -1.37852 | 3.832519 | 1.69951  |
| C             | -1.28916 | 2.838537 | -0.24483 | H             | -1.63042 | 4.911526 | 0.308161 |
| C             | -1.54472 | 1.456578 | 0.32348  | H             | -1.61811 | 2.446671 | -2.1359  |
| C             | -2.18116 | 0.452969 | -0.28495 | H             | 1.443687 | -3.63029 | 1.096125 |
| C             | -2.30198 | -0.94305 | 0.281229 | H             | -0.02859 | -4.08308 | 0.234929 |
| C             | 2.337521 | -1.79913 | -1.0039  | H             | 1.559388 | -4.40346 | -0.47907 |
| C             | 0.978198 | -2.32667 | -0.5776  | H             | 5.318157 | -1.29249 | 0.096188 |
| C             | -0.12659 | -1.62544 | -0.88286 | 07_1R4R10S_21 |          |          |          |
| C             | -1.57468 | -1.96605 | -0.64278 | C             | -2.63275 | 1.467237 | 0.024334 |
| C             | -3.78403 | -1.32547 | 0.587279 | C             | -1.33432 | 1.543488 | -0.31392 |
| C             | -4.67585 | -1.4406  | -0.65953 | C             | -3.1263  | 0.248904 | 0.789097 |
| C             | -3.88775 | -2.59753 | 1.444525 | C             | -0.60453 | 2.571233 | -1.13964 |
| C             | 4.041114 | 1.55009  | -0.00166 | C             | -3.73653 | -0.86364 | -0.09508 |
| C             | -1.83351 | 3.911906 | 0.707296 | C             | 0.567196 | 3.299149 | -0.43303 |
| O             | -2.00701 | 3.042173 | -1.47406 | C             | 1.568483 | 2.429226 | 0.379134 |
| C             | 0.97671  | -3.67632 | 0.103171 | C             | 1.938219 | 1.160158 | -0.37504 |
| O             | 4.632748 | -1.42189 | -0.57896 | C             | 1.92342  | -0.07305 | 0.14012  |
| H             | 0.927869 | 0.876238 | 1.409157 | C             | 2.220647 | -1.34856 | -0.61225 |
| H             | 3.924034 | -0.5453  | 1.864214 | C             | -2.73051 | -1.62322 | -0.98589 |
| H             | 2.204838 | -0.87118 | 1.718944 | C             | -1.48091 | -2.20372 | -0.33898 |
| H             | 0.868189 | 3.362514 | 1.503713 | C             | -0.27086 | -1.88788 | -0.8358  |
| H             | 2.137836 | 3.489105 | 0.311917 | C             | 1.086682 | -2.38682 | -0.39609 |
| H             | 3.460111 | -2.58745 | 0.663014 | C             | 3.618852 | -1.95394 | -0.27203 |
| H             | 0.298886 | 4.079193 | -0.94897 | C             | 4.75174  | -1.09592 | -0.85339 |
| H             | 0.498266 | 2.379811 | -1.36983 | C             | 3.843965 | -2.19104 | 1.230509 |
| H             | -1.13112 | 1.285597 | 1.316651 | C             | -3.68229 | 2.495814 | -0.31832 |
| H             | -2.61488 | 0.621578 | -1.27131 | C             | 2.833668 | 3.251244 | 0.672144 |
| H             | -1.77409 | -0.95251 | 1.245491 | O             | 1.018237 | 2.13058  | 1.67331  |
| H             | 2.776018 | -2.49643 | -1.73373 | C             | -1.69118 | -3.19297 | 0.783547 |
| H             | 2.220358 | -0.83741 | -1.51593 | O             | -4.40823 | -1.83544 | 0.717629 |
| H             | 0.026801 | -0.66938 | -1.38193 | H             | -0.71988 | 0.69333  | -0.02522 |
| H             | -2.08915 | -1.9823  | -1.61529 | H             | -2.31393 | -0.18818 | 1.37976  |
| H             | -1.68169 | -2.96948 | -0.22057 | H             | -3.9036  | 0.562768 | 1.502489 |
| H             | -4.17722 | -0.49601 | 1.192962 | H             | -0.19837 | 2.053363 | -2.02119 |

|               |          |          |          |               |          |          |          |
|---------------|----------|----------|----------|---------------|----------|----------|----------|
| H             | -1.2892  | 3.333286 | -1.52758 | C             | 1.365174 | -2.28909 | 0.261    |
| H             | -4.46986 | -0.40449 | -0.77844 | C             | 3.754248 | -1.50437 | -0.32918 |
| H             | 1.12309  | 3.85175  | -1.20175 | C             | 4.082127 | -2.86699 | -0.9639  |
| H             | 0.172674 | 4.046148 | 0.267191 | C             | 4.598229 | -0.41199 | -1.00576 |
| H             | 2.215919 | 1.306088 | -1.42089 | C             | -4.1404  | 1.343939 | -0.61284 |
| H             | 1.642654 | -0.18168 | 1.187758 | C             | 1.780626 | 3.75294  | -0.3947  |
| H             | 2.240693 | -1.11076 | -1.68651 | O             | 1.788942 | 2.604067 | 1.741315 |
| H             | -2.43179 | -0.947   | -1.79379 | C             | -0.56007 | -1.52602 | 2.591922 |
| H             | -3.3061  | -2.43679 | -1.45249 | O             | -4.56397 | -1.80599 | -0.23446 |
| H             | -0.24331 | -1.1981  | -1.6812  | H             | -0.76986 | 0.783785 | -1.29132 |
| H             | 1.064167 | -2.68794 | 0.657421 | H             | -3.62341 | -0.8375  | -2.24589 |
| H             | 1.352639 | -3.29278 | -0.96426 | H             | -1.89207 | -0.94381 | -1.95184 |
| H             | 3.655325 | -2.93347 | -0.77254 | H             | -0.88166 | 3.343168 | -1.31377 |
| H             | 5.729175 | -1.55082 | -0.65297 | H             | -2.20358 | 3.277652 | -0.17127 |
| H             | 4.650093 | -0.98401 | -1.93991 | H             | -2.81002 | -2.75153 | -0.81243 |
| H             | 4.751491 | -0.0922  | -0.41216 | H             | -0.39117 | 3.757422 | 1.21052  |
| H             | 4.804354 | -2.69331 | 1.396179 | H             | -0.60059 | 2.024191 | 1.442579 |
| H             | 3.868149 | -1.2441  | 1.782786 | H             | 1.363441 | 1.27147  | -1.35791 |
| H             | 3.063941 | -2.81922 | 1.674795 | H             | 2.096204 | 0.162479 | 1.395937 |
| H             | -4.51447 | 2.041297 | -0.87305 | H             | 1.946987 | -1.06707 | -1.43568 |
| H             | -4.11721 | 2.922717 | 0.59609  | H             | -2.96691 | -2.26116 | 1.670273 |
| H             | -3.292   | 3.319886 | -0.9205  | H             | -2.75125 | -0.56448 | 1.325745 |
| H             | 3.483959 | 2.697717 | 1.356753 | H             | -0.52377 | -2.18945 | -0.83783 |
| H             | 3.390532 | 3.454293 | -0.24849 | H             | 1.684742 | -2.42366 | 1.300959 |
| H             | 2.567891 | 4.207134 | 1.13786  | H             | 1.593182 | -3.23006 | -0.25354 |
| H             | 0.122186 | 1.781753 | 1.530553 | H             | 4.045577 | -1.5472  | 0.732264 |
| H             | -2.2812  | -4.04877 | 0.427131 | H             | 5.16727  | -3.02111 | -0.99291 |
| H             | -0.75091 | -3.57976 | 1.184135 | H             | 3.649347 | -3.70711 | -0.41253 |
| H             | -2.27122 | -2.75309 | 1.600926 | H             | 3.714388 | -2.91605 | -1.99762 |
| H             | -5.0522  | -1.36038 | 1.267072 | H             | 5.666947 | -0.64141 | -0.92117 |
| 07_1R4R10S_22 |          |          |          | H             | 4.357705 | -0.34131 | -2.07511 |
| C             | -2.81428 | 0.73401  | -0.9982  | H             | 4.424424 | 0.572398 | -0.56178 |
| C             | -1.62798 | 1.363896 | -0.96262 | H             | -4.04548 | 2.357633 | -0.21478 |
| C             | -2.84886 | -0.70683 | -1.47692 | H             | -4.80611 | 1.387545 | -1.48674 |
| C             | -1.29472 | 2.752191 | -0.48245 | H             | -4.65498 | 0.722382 | 0.127908 |
| C             | -3.13557 | -1.78172 | -0.40304 | H             | 2.866565 | 3.644251 | -0.50555 |
| C             | -0.30548 | 2.784208 | 0.709861 | H             | 1.351211 | 3.797218 | -1.4016  |
| C             | 1.206469 | 2.581975 | 0.424346 | H             | 1.57833  | 4.702044 | 0.112862 |
| C             | 1.512413 | 1.268455 | -0.27773 | H             | 2.739854 | 2.436861 | 1.629249 |
| C             | 1.946368 | 0.152554 | 0.315078 | H             | -1.12596 | -2.1834  | 3.266577 |
| C             | 2.231935 | -1.16036 | -0.3761  | H             | 0.502878 | -1.70089 | 2.766795 |
| C             | -2.47444 | -1.56628 | 0.968677 | H             | -0.78156 | -0.49584 | 2.903228 |
| C             | -0.97708 | -1.74452 | 1.154068 | H             | -4.7665  | -2.46814 | 0.446129 |
| C             | -0.12437 | -2.06498 | 0.16773  | 07_1R4R10S_23 |          |          |          |



|   |          |          |          |               |          |          |          |
|---|----------|----------|----------|---------------|----------|----------|----------|
| C | 3.003195 | 0.614052 | 0.864634 | H             | -3.90368 | -1.92669 | -1.24761 |
| C | 2.486173 | 1.721584 | 0.308018 | H             | 3.502876 | -0.46898 | 2.678174 |
| C | 3.793632 | -0.35861 | 0.008631 | H             | 2.880126 | 1.157814 | 2.966193 |
| C | 1.547684 | 2.697306 | 0.971609 | H             | 1.777005 | -0.13783 | 2.513262 |
| C | 2.92275  | -1.4032  | -0.74172 | H             | -2.15974 | 2.54877  | -2.06512 |
| C | 0.495819 | 3.308907 | 0.023639 | H             | -2.12445 | 3.784797 | -0.78872 |
| C | -0.47598 | 2.347347 | -0.71326 | H             | -0.99595 | 3.891796 | -2.15901 |
| C | -1.19462 | 1.411646 | 0.249869 | H             | 0.706893 | 0.874641 | -1.30804 |
| C | -1.62511 | 0.190085 | -0.08363 | H             | 0.91609  | -4.40927 | -1.30643 |
| C | -2.31991 | -0.79435 | 0.827988 | H             | -0.63806 | -3.58976 | -1.50992 |
| C | 2.188821 | -2.39744 | 0.213438 | H             | 0.832691 | -2.90197 | -2.22194 |
| C | 0.721592 | -2.64486 | -0.08814 | H             | 2.455879 | -0.29264 | -2.28549 |
| C | -0.20607 | -2.18581 | 0.767975 | 07_1R4R10S_24 |          |          |          |
| C | -1.70636 | -2.21263 | 0.647322 | C             | 2.860593 | 0.880805 | 0.662442 |
| C | -3.87138 | -0.81691 | 0.653565 | C             | 1.680323 | 1.479622 | 0.905105 |
| C | -4.51589 | 0.446451 | 1.24197  | C             | 3.083057 | -0.54225 | 1.149899 |
| C | -4.32598 | -1.01976 | -0.80085 | C             | 1.261218 | 2.895352 | 0.588879 |
| C | 2.778396 | 0.273448 | 2.327445 | C             | 3.389631 | -1.64047 | 0.104758 |
| C | -1.50579 | 3.200148 | -1.47768 | C             | 0.22093  | 3.059216 | -0.55148 |
| O | 0.211856 | 1.604714 | -1.73033 | C             | -1.28943 | 2.83855  | -0.24471 |
| C | 0.429776 | -3.42401 | -1.34705 | C             | -1.54482 | 1.456559 | 0.323611 |
| O | 1.961136 | -0.7477  | -1.58462 | C             | -2.18127 | 0.452935 | -0.28478 |
| H | 2.730773 | 1.940602 | -0.73111 | C             | -2.30199 | -0.94312 | 0.281323 |
| H | 4.358801 | 0.195592 | -0.75345 | C             | 2.337777 | -1.7991  | -1.00365 |
| H | 4.53438  | -0.90384 | 0.60907  | C             | 0.97843  | -2.32673 | -0.57755 |
| H | 1.045135 | 2.218272 | 1.819993 | C             | -0.12632 | -1.6253  | -0.88249 |
| H | 2.119179 | 3.537948 | 1.398336 | C             | -1.57442 | -1.96597 | -0.64265 |
| H | 3.597839 | -1.97933 | -1.38959 | C             | -3.78403 | -1.32577 | 0.587114 |
| H | -0.10342 | 4.023299 | 0.60479  | C             | -4.67559 | -1.44122 | -0.65985 |
| H | 1.006913 | 3.892379 | -0.75348 | C             | -3.8877  | -2.59774 | 1.444508 |
| H | -1.36894 | 1.79296  | 1.257289 | C             | 4.040876 | 1.550198 | -0.00232 |
| H | -1.43314 | -0.1535  | -1.10003 | C             | -1.83362 | 3.911882 | 0.707549 |
| H | -2.12888 | -0.487   | 1.86695  | O             | -2.00752 | 3.042169 | -1.47379 |
| H | 2.274151 | -2.04085 | 1.242078 | C             | 0.97689  | -3.67665 | 0.102695 |
| H | 2.738599 | -3.34852 | 0.173574 | O             | 4.632997 | -1.42205 | -0.57844 |
| H | 0.154    | -1.66393 | 1.656607 | H             | 0.927931 | 0.876689 | 1.409322 |
| H | -2.0117  | -2.62268 | -0.32096 | H             | 3.924025 | -0.54466 | 1.864345 |
| H | -2.1428  | -2.86945 | 1.415557 | H             | 2.204863 | -0.87071 | 1.719083 |
| H | -4.23099 | -1.67663 | 1.239553 | H             | 0.868332 | 3.362989 | 1.503318 |
| H | -5.60825 | 0.405911 | 1.153982 | H             | 2.137719 | 3.489271 | 0.311232 |
| H | -4.26882 | 0.563502 | 2.30425  | H             | 3.460047 | -2.58718 | 0.6636   |
| H | -4.16968 | 1.344255 | 0.716433 | H             | 0.298418 | 4.079271 | -0.94921 |
| H | -5.41781 | -1.107   | -0.85014 | H             | 0.49782  | 2.379875 | -1.37003 |
| H | -4.0334  | -0.16932 | -1.42823 | H             | -1.13112 | 1.285602 | 1.316744 |

|               |          |          |          |               |          |          |          |
|---------------|----------|----------|----------|---------------|----------|----------|----------|
| H             | -2.61508 | 0.621573 | -1.27109 | C             | 2.956967 | 3.238881 | -0.17417 |
| H             | -1.77424 | -0.95255 | 1.245671 | O             | 1.774197 | 2.251867 | 1.702196 |
| H             | 2.776412 | -2.49637 | -1.73343 | C             | -0.98875 | -1.93076 | 2.392282 |
| H             | 2.220615 | -0.8374  | -1.51572 | O             | -4.85059 | -1.14363 | -0.53639 |
| H             | 0.027148 | -0.66904 | -1.38114 | H             | -0.64566 | 0.797149 | -0.6619  |
| H             | -2.08872 | -1.98211 | -1.61526 | H             | -1.97325 | -0.38698 | -1.94482 |
| H             | -1.68147 | -2.96946 | -0.2206  | H             | -3.64165 | 0.072683 | -2.25845 |
| H             | -4.1775  | -0.49631 | 1.192616 | H             | -1.61985 | 3.451473 | 0.536148 |
| H             | -5.71817 | -1.60961 | -0.36503 | H             | -0.73062 | 2.309879 | 1.527357 |
| H             | -4.6503  | -0.53213 | -1.27065 | H             | -3.23625 | -2.2187  | -1.27356 |
| H             | -4.378   | -2.2835  | -1.29597 | H             | 0.389731 | 3.379715 | -1.11027 |
| H             | -4.92341 | -2.76132 | 1.765278 | H             | 0.592846 | 4.204361 | 0.431506 |
| H             | -3.57445 | -3.4913  | 0.891497 | H             | 1.750446 | 1.137101 | -1.52808 |
| H             | -3.26629 | -2.52499 | 2.345441 | H             | 1.849907 | -0.20105 | 1.221848 |
| H             | 3.839456 | 2.585188 | -0.28858 | H             | 1.568435 | -1.2705  | -1.64462 |
| H             | 4.909171 | 1.552601 | 0.672754 | H             | -3.42356 | -2.30546 | 1.234511 |
| H             | 4.35016  | 0.994912 | -0.89348 | H             | -3.03024 | -0.60597 | 1.314502 |
| H             | -2.91624 | 3.793641 | 0.817632 | H             | -0.88591 | -2.07443 | -1.09847 |
| H             | -1.37848 | 3.832438 | 1.69969  | H             | 1.245844 | -2.69405 | 1.04642  |
| H             | -1.63058 | 4.911518 | 0.308426 | H             | 1.105134 | -3.45281 | -0.52913 |
| H             | -1.61844 | 2.447042 | -2.13585 | H             | 3.252943 | -3.01817 | -1.1969  |
| H             | 1.444568 | -3.63117 | 1.095342 | H             | 5.216763 | -1.62566 | -1.80504 |
| H             | -0.02847 | -4.08308 | 0.234984 | H             | 3.766509 | -1.08489 | -2.6684  |
| H             | 1.558912 | -4.40377 | -0.48023 | H             | 4.366137 | -0.16253 | -1.28007 |
| H             | 5.318191 | -1.29184 | 0.096772 | H             | 5.042668 | -2.69257 | 0.472259 |
| 07_1R4R10S_25 |          |          |          | H             | 4.238698 | -1.256   | 1.115906 |
| C             | -2.67744 | 1.172394 | -0.66043 | H             | 3.489737 | -2.8517  | 1.299905 |
| C             | -1.41445 | 1.488002 | -0.3307  | H             | -4.44878 | 2.283684 | -1.18774 |
| C             | -2.90975 | -0.10038 | -1.45719 | H             | -4.60291 | 1.355104 | 0.292417 |
| C             | -0.88773 | 2.636566 | 0.489708 | H             | -3.66622 | 2.865036 | 0.294791 |
| C             | -3.42874 | -1.32149 | -0.66314 | H             | 3.888459 | 2.713748 | 0.070303 |
| C             | 0.447764 | 3.217666 | -0.0262  | H             | 2.946174 | 3.41217  | -1.25613 |
| C             | 1.736391 | 2.408095 | 0.276467 | H             | 2.960313 | 4.20913  | 0.334181 |
| C             | 1.773607 | 1.066921 | -0.4389  | H             | 2.608014 | 1.803245 | 1.918932 |
| C             | 1.850308 | -0.13882 | 0.133422 | H             | -1.65643 | -2.60859 | 2.942072 |
| C             | 1.909611 | -1.4534  | -0.61476 | H             | 0.0372   | -2.25891 | 2.569106 |
| C             | -2.82839 | -1.51934 | 0.738224 | H             | -1.10622 | -0.9396  | 2.851199 |
| C             | -1.36518 | -1.88309 | 0.927596 | H             | -5.19363 | -1.89029 | -0.01911 |
| C             | -0.51129 | -2.13786 | -0.07733 | 07_1R4R10S_26 |          |          |          |
| C             | 0.949133 | -2.50604 | 0.009981 | C             | 3.337779 | 1.163083 | 0.128124 |
| C             | 3.359636 | -2.02482 | -0.7353  | C             | 2.023225 | 1.414906 | 0.26438  |
| C             | 4.22536  | -1.17496 | -1.67613 | C             | 3.945778 | -0.22817 | 0.234642 |
| C             | 4.065353 | -2.21728 | 0.61696  | C             | 1.340005 | 2.763043 | 0.266524 |
| C             | -3.90304 | 1.96946  | -0.28658 | C             | 3.014262 | -1.43386 | 0.428559 |

|   |          |          |          |               |          |          |          |
|---|----------|----------|----------|---------------|----------|----------|----------|
| C | 0.140155 | 2.903769 | -0.70803 | H             | -1.03714 | 3.514218 | 1.854526 |
| C | -1.28468 | 2.643986 | -0.15347 | H             | -1.52364 | 4.672553 | 0.595386 |
| C | -1.46077 | 1.223479 | 0.353498 | H             | -3.04349 | 2.74524  | -1.00484 |
| C | -2.1519  | 0.262891 | -0.26886 | H             | 1.473914 | -3.77573 | 0.9944   |
| C | -2.28678 | -1.16373 | 0.206602 | H             | -0.07645 | -4.1999  | 0.235881 |
| C | 2.290944 | -1.84437 | -0.8718  | H             | 1.459675 | -4.56088 | -0.57112 |
| C | 0.931207 | -2.47564 | -0.64276 | H             | 4.128163 | -2.37914 | 1.736576 |
| C | -0.16639 | -1.80567 | -1.03138 | 07_1R4R10S_27 |          |          |          |
| C | -1.61605 | -2.1395  | -0.80925 | C             | -3.43142 | 0.741697 | -0.01943 |
| C | -3.75657 | -1.57753 | 0.522355 | C             | -2.16208 | 1.153647 | 0.149345 |
| C | -4.288   | -0.83185 | 1.75575  | C             | -3.79784 | -0.67256 | -0.4435  |
| C | -4.72363 | -1.4163  | -0.66199 | C             | -1.68263 | 2.523186 | 0.562467 |
| C | 4.393044 | 2.224194 | -0.09648 | C             | -2.67003 | -1.70097 | -0.60952 |
| C | -1.65103 | 3.646611 | 0.957318 | C             | -0.6383  | 3.168692 | -0.38339 |
| O | -2.12703 | 2.891918 | -1.29327 | C             | 0.861493 | 2.851629 | -0.12232 |
| C | 0.930005 | -3.81959 | 0.043762 | C             | 1.218877 | 1.399558 | -0.39395 |
| O | 3.775094 | -2.57695 | 0.854115 | C             | 2.0022   | 0.637767 | 0.376669 |
| H | 1.349637 | 0.573191 | 0.413185 | C             | 2.425241 | -0.78442 | 0.087149 |
| H | 4.651315 | -0.21244 | 1.082167 | C             | -2.06349 | -2.15464 | 0.737991 |
| H | 4.57528  | -0.41806 | -0.64852 | C             | -0.58977 | -2.49887 | 0.647524 |
| H | 1.00508  | 2.985804 | 1.290382 | C             | 0.314387 | -1.68027 | 1.21218  |
| H | 2.060642 | 3.549444 | 0.02734  | C             | 1.816195 | -1.76202 | 1.139383 |
| H | 2.269176 | -1.19477 | 1.201097 | C             | 3.979567 | -0.88792 | 0.01807  |
| H | 0.122064 | 3.928457 | -1.09938 | C             | 4.475835 | -2.32404 | -0.22088 |
| H | 0.282437 | 2.244275 | -1.57179 | C             | 4.554821 | 0.040656 | -1.06398 |
| H | -0.97558 | 1.001053 | 1.305047 | C             | -4.65044 | 1.614229 | 0.181565 |
| H | -2.61174 | 0.499724 | -1.22863 | C             | 1.717112 | 3.751563 | -1.03171 |
| H | -1.72557 | -1.25935 | 1.146995 | O             | 1.21663  | 3.237583 | 1.21427  |
| H | 2.966649 | -2.53319 | -1.39941 | C             | -0.2576  | -3.7463  | -0.13502 |
| H | 2.173785 | -0.95804 | -1.50354 | O             | -3.17463 | -2.88319 | -1.2528  |
| H | -0.00551 | -0.85012 | -1.5296  | H             | -1.36165 | 0.435361 | -0.01006 |
| H | -2.14948 | -2.07825 | -1.76863 | H             | -4.5332  | -1.08248 | 0.266365 |
| H | -1.74689 | -3.16418 | -0.44373 | H             | -4.33861 | -0.60695 | -1.4024  |
| H | -3.72074 | -2.64827 | 0.774221 | H             | -2.52698 | 3.212646 | 0.649153 |
| H | -5.29955 | -1.16914 | 2.011458 | H             | -1.25787 | 2.471733 | 1.577664 |
| H | -3.64679 | -0.99926 | 2.629761 | H             | -1.87829 | -1.2655  | -1.23647 |
| H | -4.32921 | 0.249183 | 1.576545 | H             | -0.88265 | 2.917171 | -1.42374 |
| H | -5.71382 | -1.80619 | -0.39816 | H             | -0.73231 | 4.257843 | -0.29529 |
| H | -4.85017 | -0.36209 | -0.93634 | H             | 0.832215 | 0.996164 | -1.33103 |
| H | -4.38433 | -1.95654 | -1.55245 | H             | 2.399958 | 1.065491 | 1.299481 |
| H | 5.101671 | 2.250943 | 0.743183 | H             | 2.023603 | -1.07417 | -0.89549 |
| H | 4.985063 | 1.992459 | -0.99229 | H             | -2.65336 | -3.02009 | 1.071681 |
| H | 3.98518  | 3.229387 | -0.21763 | H             | -2.20668 | -1.36051 | 1.476795 |
| H | -2.69778 | 3.511403 | 1.256103 | H             | -0.07046 | -0.8122  | 1.74705  |

|               |          |          |          |              |          |          |          |
|---------------|----------|----------|----------|--------------|----------|----------|----------|
| H             | 2.244265 | -1.52194 | 2.124373 | H            | 4.552434 | -0.45353 | -0.67188 |
| H             | 2.134316 | -2.78041 | 0.903223 | H            | 4.672029 | -0.32804 | 1.063853 |
| H             | 4.37145  | -0.55425 | 0.99208  | H            | 0.937193 | 2.848749 | 1.425078 |
| H             | 5.564586 | -2.33265 | -0.34977 | H            | 2.102565 | 3.515763 | 0.315611 |
| H             | 4.241723 | -2.99621 | 0.610184 | H            | 2.274391 | -1.27312 | 1.194781 |
| H             | 4.032773 | -2.74649 | -1.13271 | H            | 0.288067 | 3.967443 | -0.99435 |
| H             | 5.649907 | -0.01021 | -1.07503 | H            | 0.477646 | 2.300838 | -1.51824 |
| H             | 4.198543 | -0.25516 | -2.05988 | H            | -0.81929 | 0.994095 | 1.160898 |
| H             | 4.264455 | 1.083293 | -0.90442 | H            | -2.82684 | 0.59956  | -1.11039 |
| H             | -5.28416 | 1.606304 | -0.71598 | H            | -1.72905 | -1.19186 | 1.149855 |
| H             | -5.27178 | 1.226851 | 1.000991 | H            | 2.893235 | -2.52381 | -1.46701 |
| H             | -4.41102 | 2.654419 | 0.410918 | H            | 2.134043 | -0.92995 | -1.50241 |
| H             | 2.779494 | 3.58046  | -0.83365 | H            | -0.04463 | -0.78625 | -1.5056  |
| H             | 1.520746 | 3.538072 | -2.08753 | H            | -2.20957 | -1.98596 | -1.76274 |
| H             | 1.490004 | 4.806645 | -0.84208 | H            | -1.81264 | -3.09738 | -0.4582  |
| H             | 0.813228 | 2.592225 | 1.817214 | H            | -3.705   | -2.59769 | 0.886505 |
| H             | -0.71868 | -3.71289 | -1.12901 | H            | -5.2815  | -1.1238  | 2.121157 |
| H             | 0.816776 | -3.90503 | -0.25591 | H            | -3.61678 | -0.86684 | 2.674147 |
| H             | -0.67788 | -4.63194 | 0.362299 | H            | -4.38172 | 0.309749 | 1.594826 |
| H             | -3.44134 | -2.63452 | -2.15268 | H            | -5.74897 | -1.84845 | -0.25819 |
| 07_1R4R10S_28 |          |          |          | H            | -4.93822 | -0.40748 | -0.8772  |
| C             | 3.358856 | 1.10948  | 0.204055 | H            | -4.44828 | -2.01443 | -1.44245 |
| C             | 2.048241 | 1.36653  | 0.362816 | H            | 5.148127 | 2.140975 | 0.843444 |
| C             | 3.94692  | -0.29393 | 0.233823 | H            | 4.993362 | 1.982325 | -0.90098 |
| C             | 1.367223 | 2.713986 | 0.42162  | H            | 4.023121 | 3.183783 | -0.03809 |
| C             | 2.99907  | -1.49245 | 0.397108 | H            | -2.77181 | 3.53961  | 0.998602 |
| C             | 0.255696 | 2.928586 | -0.64396 | H            | -1.17092 | 3.566741 | 1.758651 |
| C             | -1.22173 | 2.66519  | -0.23389 | H            | -1.54609 | 4.70416  | 0.444051 |
| C             | -1.41616 | 1.25283  | 0.285525 | H            | -1.7232  | 2.325894 | -2.09434 |
| C             | -2.22459 | 0.329121 | -0.24316 | H            | 1.420894 | -3.80968 | 0.912493 |
| C             | -2.32477 | -1.10165 | 0.230392 | H            | -0.15474 | -4.17767 | 0.176834 |
| C             | 2.242237 | -1.83984 | -0.90334 | H            | 1.354986 | -4.54877 | -0.67408 |
| C             | 0.872768 | -2.4512  | -0.67432 | H            | 4.125393 | -2.50783 | 1.640603 |
| C             | -0.21753 | -1.75236 | -1.03271 | 07_1R4R10R_3 |          |          |          |
| C             | -1.67108 | -2.06845 | -0.80775 | C            | 2.486319 | 1.669859 | 0.422086 |
| C             | -3.77422 | -1.53796 | 0.597379 | C            | 1.198497 | 1.957385 | 0.679736 |
| C             | -4.29267 | -0.76034 | 1.816817 | C            | 3.098811 | 0.401604 | 0.992923 |
| C             | -4.77634 | -1.44611 | -0.56529 | C            | 0.409506 | 3.179873 | 0.28206  |
| C             | 4.422385 | 2.169295 | 0.018679 | C            | 3.834071 | -0.51956 | -0.00143 |
| C             | -1.70341 | 3.683512 | 0.809842 | C            | -0.74074 | 2.943558 | -0.72794 |
| O             | -2.03943 | 2.914971 | -1.38903 | C            | -2.06347 | 2.314311 | -0.21692 |
| C             | 0.855654 | -3.81424 | -0.02655 | C            | -1.85812 | 0.921981 | 0.352531 |
| O             | 3.749617 | -2.66364 | 0.759054 | C            | -2.04818 | -0.22191 | -0.31204 |
| H             | 1.370828 | 0.522188 | 0.471948 | C            | -1.76974 | -1.59995 | 0.238454 |

|   |          |          |          |              |          |          |          |
|---|----------|----------|----------|--------------|----------|----------|----------|
| C | 2.942208 | -1.17153 | -1.0743  | H            | 2.791248 | -3.93204 | -0.56648 |
| C | 1.772194 | -2.03344 | -0.62389 | H            | 5.082754 | -1.1461  | 1.368487 |
| C | 0.52009  | -1.64973 | -0.93002 | 07_1R4R10R_4 |          |          |          |
| C | -0.78075 | -2.36945 | -0.68543 | C            | 2.578689 | 1.393456 | 0.47745  |
| C | -3.06283 | -2.4328  | 0.504947 | C            | 1.44502  | 1.965216 | 0.920599 |
| C | -3.8411  | -1.87563 | 1.705967 | C            | 2.900163 | -0.03267 | 0.879312 |
| C | -3.98462 | -2.56288 | -0.71841 | C            | 0.949882 | 3.367641 | 0.657152 |
| C | 3.430239 | 2.563662 | -0.34978 | C            | 3.184541 | -0.99354 | -0.29203 |
| C | -2.75447 | 3.213206 | 0.82417  | C            | -0.57856 | 3.539518 | 0.742457 |
| O | -2.87639 | 2.265903 | -1.40473 | C            | -1.42967 | 2.674815 | -0.23242 |
| C | 2.122874 | -3.33138 | 0.066233 | C            | -1.65583 | 1.267585 | 0.308318 |
| O | 4.511901 | -1.56701 | 0.705709 | C            | -1.78428 | 0.165656 | -0.43745 |
| H | 0.646455 | 1.221946 | 1.260917 | C            | -2.08446 | -1.22412 | 0.079344 |
| H | 2.334576 | -0.18507 | 1.514632 | C            | 2.793837 | -2.4436  | 0.028951 |
| H | 3.845627 | 0.695815 | 1.750965 | C            | 1.320865 | -2.82248 | -0.00511 |
| H | 1.07416  | 3.927502 | -0.16229 | C            | 0.349414 | -1.9686  | -0.37306 |
| H | 0.001114 | 3.651189 | 1.187943 | C            | -1.11857 | -2.26176 | -0.5577  |
| H | 4.583688 | 0.07726  | -0.5448  | C            | -3.57973 | -1.59988 | -0.18687 |
| H | -1.01724 | 3.912129 | -1.16471 | C            | -3.91722 | -3.04676 | 0.216361 |
| H | -0.37831 | 2.316453 | -1.55081 | C            | -4.54221 | -0.63933 | 0.529487 |
| H | -1.512   | 0.884304 | 1.38549  | C            | 3.606951 | 2.101884 | -0.37123 |
| H | -2.38715 | -0.16772 | -1.34718 | C            | -2.79226 | 3.355911 | -0.44507 |
| H | -1.26952 | -1.47912 | 1.209916 | O            | -0.82336 | 2.636657 | -1.53438 |
| H | 3.61115  | -1.78195 | -1.69937 | C            | 1.091857 | -4.27135 | 0.364324 |
| H | 2.566818 | -0.36368 | -1.71325 | O            | 4.595424 | -0.90981 | -0.55303 |
| H | 0.408687 | -0.69405 | -1.44236 | H            | 0.809242 | 1.366309 | 1.572575 |
| H | -1.26847 | -2.53181 | -1.65873 | H            | 2.073284 | -0.43094 | 1.475964 |
| H | -0.61478 | -3.36322 | -0.25628 | H            | 3.797466 | -0.05867 | 1.516105 |
| H | -2.72284 | -3.44463 | 0.772653 | H            | 1.391756 | 4.060834 | 1.389721 |
| H | -4.72511 | -2.48856 | 1.919039 | H            | 1.287978 | 3.722927 | -0.32295 |
| H | -3.21977 | -1.85695 | 2.609658 | H            | 2.637459 | -0.66217 | -1.18671 |
| H | -4.18086 | -0.85082 | 1.514208 | H            | -0.918   | 3.343418 | 1.76873  |
| H | -4.82424 | -3.23078 | -0.49269 | H            | -0.80015 | 4.594745 | 0.540737 |
| H | -4.40577 | -1.59159 | -1.00484 | H            | -1.77207 | 1.195165 | 1.390593 |
| H | -3.46386 | -2.97316 | -1.5905  | H            | -1.68938 | 0.260048 | -1.52149 |
| H | 4.360111 | 2.722648 | 0.21345  | H            | -1.93152 | -1.23465 | 1.169162 |
| H | 3.72144  | 2.111763 | -1.30734 | H            | 3.217118 | -2.7062  | 1.01089  |
| H | 3.003135 | 3.544433 | -0.57094 | H            | 3.318398 | -3.09884 | -0.68634 |
| H | -3.73464 | 2.79941  | 1.091143 | H            | 0.628446 | -0.94459 | -0.6113  |
| H | -2.17105 | 3.294792 | 1.747739 | H            | -1.33497 | -2.28951 | -1.63955 |
| H | -2.90372 | 4.218147 | 0.415412 | H            | -1.35888 | -3.25602 | -0.17807 |
| H | -3.69993 | 1.810583 | -1.16147 | H            | -3.75003 | -1.50389 | -1.27075 |
| H | 2.674733 | -3.1425  | 0.992392 | H            | -4.99304 | -3.22767 | 0.107695 |
| H | 1.244738 | -3.93886 | 0.298501 | H            | -3.40013 | -3.7905  | -0.39699 |

|              |          |          |          |              |          |          |          |
|--------------|----------|----------|----------|--------------|----------|----------|----------|
| H            | -3.65644 | -3.23291 | 1.266757 | H            | -0.52991 | 3.342833 | 1.243184 |
| H            | -5.58262 | -0.88729 | 0.28871  | H            | -0.97194 | 4.42541  | -0.07568 |
| H            | -4.42788 | -0.71534 | 1.619308 | H            | -1.24163 | 1.015274 | 1.327235 |
| H            | -4.36713 | 0.402298 | 0.247627 | H            | -2.18482 | -0.07947 | -1.37048 |
| H            | 3.27173  | 3.086466 | -0.70679 | H            | -1.28904 | -1.38499 | 1.280396 |
| H            | 4.535471 | 2.241531 | 0.200059 | H            | 3.645656 | -2.44794 | 0.576202 |
| H            | 3.883427 | 1.507249 | -1.24865 | H            | 3.582437 | -2.60749 | -1.16318 |
| H            | -3.40844 | 2.762866 | -1.12762 | H            | 0.70422  | -1.04303 | -0.98272 |
| H            | -3.32701 | 3.459788 | 0.505212 | H            | -1.27133 | -2.50216 | -1.56548 |
| H            | -2.65059 | 4.354532 | -0.87369 | H            | -0.99136 | -3.47203 | -0.12754 |
| H            | -0.02084 | 2.094668 | -1.44586 | H            | -2.99099 | -3.12331 | 0.945001 |
| H            | 1.59536  | -4.93915 | -0.34893 | H            | -4.8929  | -1.82498 | 1.872424 |
| H            | 1.525086 | -4.48987 | 1.349896 | H            | -3.35827 | -1.28534 | 2.575855 |
| H            | 0.037307 | -4.55249 | 0.392939 | H            | -4.1505  | -0.3107  | 1.32725  |
| H            | 4.772396 | -1.41251 | -1.36457 | H            | -4.97633 | -2.77312 | -0.46982 |
| 07_1R4R10R_5 |          |          |          | H            | -4.30842 | -1.27263 | -1.12101 |
| C            | 2.39171  | 1.592071 | 0.648284 | H            | -3.53602 | -2.82412 | -1.49231 |
| C            | 1.426146 | 1.913948 | -0.22864 | H            | 2.771644 | 3.606617 | 1.405857 |
| C            | 2.789431 | 0.127697 | 0.825544 | H            | 2.893265 | 2.319754 | 2.615532 |
| C            | 0.776939 | 3.246554 | -0.48847 | H            | 4.17489  | 2.521518 | 1.430567 |
| C            | 3.189673 | -0.62546 | -0.4609  | H            | -3.90495 | 2.322943 | -0.1834  |
| C            | -0.6239  | 3.409672 | 0.151397 | H            | -3.14377 | 3.080074 | 1.233033 |
| C            | -1.73927 | 2.427701 | -0.30627 | H            | -3.26377 | 3.980023 | -0.29561 |
| C            | -1.56944 | 1.035175 | 0.287092 | H            | -1.04078 | 1.895589 | -2.05873 |
| C            | -1.84831 | -0.11736 | -0.33336 | H            | 2.305408 | -4.78068 | -0.23869 |
| C            | -1.76611 | -1.4907  | 0.295633 | H            | 2.030994 | -4.14875 | 1.379266 |
| C            | 3.067207 | -2.14347 | -0.3089  | H            | 0.650864 | -4.58187 | 0.355418 |
| C            | 1.661772 | -2.72229 | -0.20017 | H            | 4.630527 | 0.59583  | -0.94752 |
| C            | 0.566568 | -2.04537 | -0.58609 | 07_1R4R10R_6 |          |          |          |
| C            | -0.87882 | -2.46307 | -0.53793 | C            | 2.521936 | 1.263436 | 0.777575 |
| C            | -3.17757 | -2.11024 | 0.557724 | C            | 1.730568 | 1.769258 | -0.18302 |
| C            | -3.93713 | -1.33755 | 1.645514 | C            | 2.724704 | -0.24527 | 0.892616 |
| C            | -4.0412  | -2.2519  | -0.70639 | C            | 1.282195 | 3.191807 | -0.38868 |
| C            | 3.085213 | 2.571351 | 1.562965 | C            | 3.063871 | -0.99502 | -0.41156 |
| C            | -3.10065 | 2.989027 | 0.142653 | C            | -0.11734 | 3.51106  | 0.19006  |
| O            | -1.81624 | 2.385521 | -1.74049 | C            | -1.3231  | 2.70568  | -0.37066 |
| C            | 1.644945 | -4.12954 | 0.350692 | C            | -1.3963  | 1.290014 | 0.190956 |
| O            | 4.557578 | -0.36169 | -0.80399 | C            | -1.83908 | 0.214903 | -0.47078 |
| H            | 0.996628 | 1.095677 | -0.80289 | C            | -2.03815 | -1.16916 | 0.109216 |
| H            | 1.952605 | -0.40415 | 1.295616 | C            | 2.723181 | -2.48381 | -0.33171 |
| H            | 3.637445 | 0.043979 | 1.516573 | C            | 1.248038 | -2.86276 | -0.31947 |
| H            | 1.401872 | 4.069182 | -0.12423 | C            | 0.269744 | -1.99758 | -0.6395  |
| H            | 0.678685 | 3.399987 | -1.57259 | C            | -1.21769 | -2.22952 | -0.68487 |
| H            | 2.555591 | -0.29604 | -1.29399 | C            | -3.55973 | -1.52779 | 0.14476  |

|              |          |          |          |   |          |          |          |
|--------------|----------|----------|----------|---|----------|----------|----------|
| C            | -3.83113 | -2.93734 | 0.69996  | C | 2.903765 | -0.1869  | 0.806956 |
| C            | -4.36429 | -0.50147 | 0.959321 | C | 1.16402  | 3.329027 | 0.60807  |
| C            | 3.180489 | 2.083167 | 1.859981 | C | 3.094734 | -1.18179 | -0.35567 |
| C            | -2.61944 | 3.447385 | 0.003872 | C | -0.33493 | 3.623561 | 0.808793 |
| O            | -1.30573 | 2.703578 | -1.80786 | C | -1.32703 | 2.835376 | -0.0944  |
| C            | 1.020558 | -4.30921 | 0.056356 | C | -1.59261 | 1.437499 | 0.4468   |
| O            | 4.468249 | -0.91191 | -0.69457 | C | -1.77465 | 0.340176 | -0.29405 |
| H            | 1.296002 | 1.063051 | -0.88795 | C | -2.09979 | -1.03087 | 0.258922 |
| H            | 1.814344 | -0.68114 | 1.324596 | C | 2.620105 | -2.5999  | -0.00374 |
| H            | 3.534959 | -0.46456 | 1.599527 | C | 1.124776 | -2.87944 | 0.01239  |
| H            | 1.990368 | 3.898772 | 0.057294 | C | 0.206224 | -1.96764 | -0.34984 |
| H            | 1.267355 | 3.416522 | -1.46384 | C | -1.28766 | -2.1358  | -0.46859 |
| H            | 2.516249 | -0.55272 | -1.25328 | C | -3.6424  | -1.29064 | 0.239596 |
| H            | -0.09389 | 3.384952 | 1.280437 | C | -4.249   | -1.3362  | -1.1719  |
| H            | -0.31603 | 4.573361 | -0.00165 | C | -4.03419 | -2.54261 | 1.040988 |
| H            | -1.12581 | 1.195825 | 1.243212 | C | 3.68475  | 1.882989 | -0.50942 |
| H            | -2.12623 | 0.331766 | -1.51846 | C | -2.6571  | 3.603681 | -0.17079 |
| H            | -1.67474 | -1.16901 | 1.148017 | O | -0.84488 | 2.784243 | -1.44635 |
| H            | 3.205581 | -2.90303 | 0.564374 | C | 0.803907 | -4.29723 | 0.429122 |
| H            | 3.211583 | -2.98411 | -1.18134 | O | 4.500691 | -1.19456 | -0.65366 |
| H            | 0.552545 | -0.98268 | -0.90321 | H | 0.930052 | 1.350127 | 1.556959 |
| H            | -1.5595  | -2.19967 | -1.73295 | H | 2.075089 | -0.52615 | 1.436843 |
| H            | -1.46048 | -3.22643 | -0.31358 | H | 3.818066 | -0.25588 | 1.415798 |
| H            | -3.92644 | -1.49759 | -0.8934  | H | 1.714178 | 4.002539 | 1.283423 |
| H            | -4.91011 | -3.10081 | 0.804657 | H | 1.449109 | 3.637398 | -0.40479 |
| H            | -3.44597 | -3.73175 | 0.054015 | H | 2.547739 | -0.82814 | -1.24168 |
| H            | -3.38091 | -3.06149 | 1.693906 | H | -0.60876 | 3.452926 | 1.859031 |
| H            | -5.42999 | -0.75874 | 0.956044 | H | -0.48581 | 4.693578 | 0.619957 |
| H            | -4.02992 | -0.48696 | 2.005484 | H | -1.67639 | 1.367608 | 1.532738 |
| H            | -4.25872 | 0.512168 | 0.56328  | H | -1.70474 | 0.429875 | -1.37897 |
| H            | 2.992587 | 3.155622 | 1.76507  | H | -1.80328 | -1.04396 | 1.317588 |
| H            | 2.826842 | 1.768546 | 2.851946 | H | 3.05492  | -2.87784 | 0.968909 |
| H            | 4.267889 | 1.925402 | 1.858333 | H | 3.07954  | -3.29622 | -0.72506 |
| H            | -3.48696 | 2.909904 | -0.39041 | H | 0.552679 | -0.97322 | -0.62355 |
| H            | -2.72273 | 3.525981 | 1.091255 | H | -1.55165 | -2.10635 | -1.53741 |
| H            | -2.6095  | 4.45864  | -0.41808 | H | -1.60302 | -3.11738 | -0.10565 |
| H            | -0.59858 | 2.099988 | -2.0877  | H | -4.0839  | -0.42622 | 0.755736 |
| H            | 1.58931  | -4.9734  | -0.60912 | H | -5.34009 | -1.42781 | -1.11345 |
| H            | 1.38438  | -4.5074  | 1.074042 | H | -4.02365 | -0.42864 | -1.74293 |
| H            | -0.02766 | -4.6114  | 0.008327 | H | -3.88033 | -2.19579 | -1.74435 |
| H            | 4.679926 | 0.032378 | -0.77592 | H | -5.12405 | -2.6036  | 1.145489 |
| 07_1R4R10R_7 |          |          |          | H | -3.70402 | -3.46576 | 0.550164 |
| C            | 2.652916 | 1.250851 | 0.393651 | H | -3.60175 | -2.52461 | 2.048826 |
| C            | 1.575918 | 1.898778 | 0.871818 | H | 4.649362 | 1.957745 | 0.011838 |

|              |          |          |          |              |          |          |          |
|--------------|----------|----------|----------|--------------|----------|----------|----------|
| H            | 3.87188  | 1.269584 | -1.39799 | H            | 3.766177 | -2.29533 | 0.624226 |
| H            | 3.402154 | 2.887876 | -0.83314 | H            | 3.710104 | -2.5011  | -1.11095 |
| H            | -3.3699  | 3.061023 | -0.79902 | H            | 0.784485 | -1.04903 | -1.00311 |
| H            | -3.0938  | 3.723845 | 0.826448 | H            | -1.12737 | -2.58266 | -1.55332 |
| H            | -2.49245 | 4.598676 | -0.59948 | H            | -0.8251  | -3.51921 | -0.09835 |
| H            | -0.07504 | 2.190439 | -1.442   | H            | -2.90336 | -3.25545 | 0.823923 |
| H            | 1.260811 | -5.01922 | -0.26229 | H            | -4.8659  | -2.03689 | 1.734939 |
| H            | 1.224508 | -4.51179 | 1.421117 | H            | -3.36837 | -1.50375 | 2.518852 |
| H            | -0.26705 | -4.50653 | 0.467402 | H            | -4.13359 | -0.48643 | 1.287379 |
| H            | 4.622575 | -1.7233  | -1.45874 | H            | -4.84801 | -2.88485 | -0.64286 |
| 07_1R4R10R_8 |          |          |          | H            | -4.19058 | -1.3432  | -1.20367 |
| C            | 2.358667 | 1.69296  | 0.581384 | H            | -3.37388 | -2.8606  | -1.61726 |
| C            | 1.308202 | 1.924018 | -0.22371 | H            | 2.775675 | 3.766805 | 1.128984 |
| C            | 2.810783 | 0.251747 | 0.809378 | H            | 3.017973 | 2.590954 | 2.430594 |
| C            | 0.600516 | 3.21446  | -0.52777 | H            | 4.190181 | 2.696855 | 1.126819 |
| C            | 3.244359 | -0.51679 | -0.45778 | H            | -4.05672 | 2.227863 | 0.032496 |
| C            | -0.77457 | 3.358057 | 0.168087 | H            | -3.22345 | 2.957942 | 1.412383 |
| C            | -1.89169 | 2.360323 | -0.22873 | H            | -3.43472 | 3.893255 | -0.08576 |
| C            | -1.68147 | 0.962779 | 0.34143  | H            | -2.73606 | 1.875126 | -1.92735 |
| C            | -1.77879 | -0.18982 | -0.33023 | H            | 2.512597 | -4.6928  | -0.09542 |
| C            | -1.69247 | -1.57108 | 0.284089 | H            | 2.19824  | -4.0075  | 1.493249 |
| C            | 3.178209 | -2.03429 | -0.26845 | H            | 0.84563  | -4.53173 | 0.475245 |
| C            | 1.79363  | -2.65942 | -0.14511 | H            | 4.633562 | 0.74224  | -0.99669 |
| C            | 0.67837  | -2.03849 | -0.56637 | 07_1R4R10R_9 |          |          |          |
| C            | -0.74986 | -2.51231 | -0.52176 | C            | 2.610907 | 1.483796 | 0.432716 |
| C            | -3.09869 | -2.23076 | 0.473457 | C            | 1.368776 | 1.893714 | 0.743824 |
| C            | -3.91191 | -1.52296 | 1.566279 | C            | 3.106442 | 0.141282 | 0.944468 |
| C            | -3.91693 | -2.33506 | -0.82404 | C            | 0.701582 | 3.205316 | 0.410666 |
| C            | 3.114836 | 2.750729 | 1.347292 | C            | 3.714493 | -0.81654 | -0.09974 |
| C            | -3.23439 | 2.894981 | 0.318525 | C            | -0.46683 | 3.133733 | -0.60394 |
| O            | -1.93476 | 2.355152 | -1.66232 | C            | -1.84731 | 2.625601 | -0.11334 |
| C            | 1.822515 | -4.04354 | 0.461245 | C            | -1.78019 | 1.206475 | 0.41961  |
| O            | 4.601836 | -0.20961 | -0.80801 | C            | -2.09818 | 0.10425  | -0.26492 |
| H            | 0.84731  | 1.058535 | -0.69242 | C            | -1.96727 | -1.30312 | 0.267789 |
| H            | 1.991807 | -0.30118 | 1.28482  | C            | 2.725423 | -1.35002 | -1.15278 |
| H            | 3.657226 | 0.218563 | 1.506635 | C            | 1.4837   | -2.09048 | -0.67828 |
| H            | 1.206605 | 4.07875  | -0.23282 | C            | 0.271036 | -1.57893 | -0.95473 |
| H            | 0.442308 | 3.296637 | -1.6104  | C            | -1.09191 | -2.16503 | -0.68747 |
| H            | 2.597441 | -0.22817 | -1.29624 | C            | -3.36118 | -1.93866 | 0.57426  |
| H            | -0.63954 | 3.300466 | 1.255637 | C            | -4.2493  | -2.13025 | -0.6658  |
| H            | -1.1521  | 4.365168 | -0.05108 | C            | -3.23785 | -3.25199 | 1.363545 |
| H            | -1.50706 | 0.936216 | 1.418393 | C            | 3.616363 | 2.300151 | -0.34722 |
| H            | -1.94021 | -0.15468 | -1.40883 | C            | -2.4504  | 3.56113  | 0.95001  |
| H            | -1.26379 | -1.46836 | 1.291199 | O            | -2.65672 | 2.688174 | -1.30262 |



|               |          |          |          |   |          |          |          |
|---------------|----------|----------|----------|---|----------|----------|----------|
| C             | 1.714541 | -3.42037 | 0.000844 | C | -1.48856 | 1.575591 | 0.127732 |
| O             | 4.313056 | -1.9442  | 0.554575 | C | -1.779   | 0.327274 | -0.2507  |
| H             | 0.763611 | 1.199756 | 1.32333  | C | -2.59781 | -0.67243 | 0.536592 |
| H             | 2.300795 | -0.38224 | 1.471258 | C | 2.054577 | -2.20254 | 0.529342 |
| H             | 3.899633 | 0.3326   | 1.688064 | C | 0.622464 | -2.52316 | 0.145919 |
| H             | 1.43691  | 3.9046   | 0.000377 | C | -0.39201 | -1.94151 | 0.809258 |
| H             | 0.343148 | 3.668816 | 1.341327 | C | -1.87192 | -2.05179 | 0.546324 |
| H             | 4.498738 | -0.27957 | -0.65633 | C | -4.05394 | -0.79947 | -0.00925 |
| H             | -0.63916 | 4.142682 | -1.0011  | C | -4.85741 | -1.89656 | 0.710256 |
| H             | -0.17215 | 2.504918 | -1.45193 | C | -4.81583 | 0.532108 | 0.075365 |
| H             | -1.42773 | 1.108428 | 1.446652 | C | 4.32789  | 1.672065 | 1.287003 |
| H             | -2.44385 | 0.212937 | -1.29341 | C | -1.55294 | 3.697087 | -1.19897 |
| H             | -1.43794 | -1.24534 | 1.22977  | O | 0.023428 | 1.946884 | -1.76302 |
| H             | 3.306381 | -2.01649 | -1.808   | C | 0.462801 | -3.49267 | -1.00085 |
| H             | 2.418812 | -0.4959  | -1.76769 | O | 3.549434 | -2.47692 | -1.32205 |
| H             | 0.246437 | -0.61231 | -1.45796 | H | 1.299565 | 0.446611 | 0.042725 |
| H             | -1.61752 | -2.25475 | -1.65017 | H | 4.485581 | -0.94895 | 0.709839 |
| H             | -1.01396 | -3.1791  | -0.28557 | H | 4.518648 | -0.1404  | -0.83896 |
| H             | -3.86901 | -1.21545 | 1.229136 | H | 0.532546 | 1.88672  | 1.926493 |
| H             | -5.24383 | -2.48486 | -0.37003 | H | 1.931776 | 2.926315 | 1.758578 |
| H             | -4.38399 | -1.1956  | -1.22147 | H | 2.143435 | -0.95708 | -1.2536  |
| H             | -3.83063 | -2.8731  | -1.35527 | H | -0.00897 | 3.990863 | 0.830447 |
| H             | -4.22477 | -3.59218 | 1.699358 | H | 1.154852 | 3.706841 | -0.46035 |
| H             | -2.80611 | -4.05643 | 0.756431 | H | -1.88484 | 1.953245 | 1.072304 |
| H             | -2.60669 | -3.12621 | 2.251806 | H | -1.37257 | -0.04344 | -1.19248 |
| H             | 4.577002 | 2.342835 | 0.184397 | H | -2.66832 | -0.314   | 1.575218 |
| H             | 3.824524 | 1.85247  | -1.32814 | H | 2.057986 | -1.59348 | 1.438129 |
| H             | 3.287038 | 3.326701 | -0.52349 | H | 2.61567  | -3.12183 | 0.751024 |
| H             | -3.46436 | 3.234203 | 1.211144 | H | -0.13026 | -1.28143 | 1.637903 |
| H             | -1.86017 | 3.568076 | 1.872865 | H | -2.05786 | -2.55341 | -0.41143 |
| H             | -2.50601 | 4.584267 | 0.563508 | H | -2.33662 | -2.68196 | 1.31682  |
| H             | -3.52724 | 2.325181 | -1.06753 | H | -3.97799 | -1.07932 | -1.07202 |
| H             | 2.3237   | -3.29424 | 0.901203 | H | -5.89085 | -1.91399 | 0.344372 |
| H             | 0.7841   | -3.92434 | 0.273676 | H | -4.43786 | -2.89511 | 0.555718 |
| H             | 2.2831   | -4.09307 | -0.65669 | H | -4.89334 | -1.70917 | 1.791802 |
| H             | 4.953429 | -1.59949 | 1.1977   | H | -5.81655 | 0.43277  | -0.36154 |
| 07_1R4R10R_10 |          |          |          | H | -4.94115 | 0.843286 | 1.121287 |
| C             | 3.27304  | 0.824162 | 0.613435 | H | -4.2929  | 1.335814 | -0.4508  |
| C             | 1.965194 | 1.127207 | 0.562332 | H | 4.789389 | 1.1312   | 2.125319 |
| C             | 3.840329 | -0.43663 | -0.02098 | H | 5.141273 | 1.905163 | 0.58571  |
| C             | 1.244585 | 2.28997  | 1.190589 | H | 3.941012 | 2.618309 | 1.672062 |
| C             | 2.845732 | -1.46646 | -0.57854 | H | -2.27737 | 3.290706 | -1.91553 |
| C             | 0.460082 | 3.205268 | 0.22413  | H | -2.11689 | 4.182158 | -0.39468 |
| C             | -0.64817 | 2.570983 | -0.65582 | H | -0.94811 | 4.45639  | -1.70764 |

|               |          |          |          |               |          |          |          |
|---------------|----------|----------|----------|---------------|----------|----------|----------|
| H             | -0.66166 | 1.658312 | -2.38808 | H             | 4.038638 | -0.93303 | 1.104419 |
| H             | 1.074138 | -3.19031 | -1.85896 | H             | 5.997477 | -1.6562  | -0.30838 |
| H             | 0.827119 | -4.48774 | -0.7079  | H             | 4.598542 | -2.70797 | -0.53978 |
| H             | -0.57274 | -3.60275 | -1.33184 | H             | 5.000286 | -1.48696 | -1.76047 |
| H             | 3.95634  | -2.04111 | -2.08843 | H             | 5.801849 | 0.676699 | 0.409794 |
| 07_1R4R10R_11 |          |          |          | H             | 4.90121  | 1.062486 | -1.0649  |
| C             | -3.2783  | 0.750502 | -0.59042 | H             | 4.233597 | 1.497555 | 0.51639  |
| C             | -1.96926 | 1.043257 | -0.69624 | H             | -4.03524 | 2.625844 | -1.42277 |
| C             | -3.79139 | -0.5695  | -0.04124 | H             | -5.03324 | 1.202205 | -1.76332 |
| C             | -1.32278 | 2.280553 | -1.27174 | H             | -5.04273 | 1.9131   | -0.15477 |
| C             | -2.77259 | -1.56626 | 0.516888 | H             | 2.006301 | 3.19207  | 2.051797 |
| C             | -0.57549 | 3.194573 | -0.26912 | H             | 1.955685 | 4.150641 | 0.556208 |
| C             | 0.488695 | 2.536245 | 0.651427 | H             | 0.70091  | 4.374518 | 1.797854 |
| C             | 1.381493 | 1.58527  | -0.13242 | H             | -0.83631 | 1.293133 | 1.383395 |
| C             | 1.784164 | 0.380593 | 0.282568 | H             | -0.74253 | -3.01552 | 1.936181 |
| C             | 2.646194 | -0.57987 | -0.5061  | H             | -0.83829 | -4.41023 | 0.855915 |
| C             | -1.9343  | -2.28442 | -0.5819  | H             | 0.726976 | -3.68521 | 1.234909 |
| C             | -0.49735 | -2.54387 | -0.17134 | H             | -2.92792 | -3.1354  | 1.684155 |
| C             | 0.512476 | -1.95058 | -0.83098 | 07_1R4R10R_12 |          |          |          |
| C             | 1.987549 | -1.99261 | -0.52605 | C             | 2.314218 | 1.769716 | 0.386668 |
| C             | 4.104679 | -0.64017 | 0.04469  | C             | 1.100198 | 2.143318 | 0.827719 |
| C             | 4.966824 | -1.6873  | -0.68109 | C             | 2.895503 | 0.442588 | 0.834071 |
| C             | 4.795949 | 0.730331 | -0.02315 | C             | 0.356822 | 3.422528 | 0.516392 |
| C             | -4.39312 | 1.68072  | -1.00951 | C             | 3.34806  | -0.49003 | -0.30744 |
| C             | 1.342532 | 3.636105 | 1.303275 | C             | -1.16997 | 3.350972 | 0.708526 |
| O             | -0.14945 | 1.871179 | 1.755034 | C             | -1.93818 | 2.322472 | -0.17054 |
| C             | -0.31905 | -3.4559  | 1.021301 | C             | -1.85007 | 0.913509 | 0.400705 |
| O             | -3.54424 | -2.50161 | 1.285466 | C             | -1.78661 | -0.21196 | -0.31856 |
| H             | -1.2528  | 0.283097 | -0.39249 | C             | -1.74558 | -1.61203 | 0.251584 |
| H             | -4.38534 | -1.07262 | -0.8206  | C             | 3.225754 | -1.97629 | 0.060696 |
| H             | -4.50426 | -0.35595 | 0.768059 | C             | 1.841945 | -2.60841 | 0.066075 |
| H             | -0.60377 | 1.952306 | -2.03569 | C             | 0.735843 | -1.95211 | -0.32458 |
| H             | -2.05671 | 2.900342 | -1.79672 | C             | -0.66971 | -2.48001 | -0.45671 |
| H             | -2.09156 | -1.02711 | 1.193747 | C             | -3.14059 | -2.31875 | 0.219383 |
| H             | -0.08679 | 3.986412 | -0.85234 | C             | -4.11804 | -1.67976 | 1.216034 |
| H             | -1.29879 | 3.689577 | 0.391031 | C             | -3.76959 | -2.38682 | -1.18161 |
| H             | 1.70818  | 1.952856 | -1.10736 | C             | 3.183033 | 2.619837 | -0.50883 |
| H             | 1.45615  | 0.038367 | 1.264847 | C             | -3.41657 | 2.738717 | -0.25287 |
| H             | 2.70237  | -0.21656 | -1.54398 | O             | -1.46204 | 2.363352 | -1.52512 |
| H             | -1.94659 | -1.6909  | -1.50175 | C             | 1.866674 | -4.05475 | 0.507024 |
| H             | -2.4575  | -3.22587 | -0.80519 | O             | 4.72025  | -0.1614  | -0.58052 |
| H             | 0.248467 | -1.33268 | -1.69099 | H             | 0.591517 | 1.466631 | 1.513683 |
| H             | 2.172411 | -2.47964 | 0.438937 | H             | 2.157927 | -0.07972 | 1.451522 |
| H             | 2.499251 | -2.60191 | -1.28324 | H             | 3.784848 | 0.604329 | 1.461844 |

|               |          |          |          |   |          |          |          |
|---------------|----------|----------|----------|---|----------|----------|----------|
| H             | 0.722486 | 4.232079 | 1.166926 | C | 0.343703 | -2.01739 | -0.62624 |
| H             | 0.566919 | 3.756034 | -0.50685 | C | -1.13567 | -2.2989  | -0.6432  |
| H             | 2.749826 | -0.29219 | -1.20885 | C | -3.50993 | -1.61316 | 0.100016 |
| H             | -1.40126 | 3.148665 | 1.763313 | C | -3.78324 | -3.05614 | 0.561031 |
| H             | -1.57396 | 4.346869 | 0.488983 | C | -4.33823 | -0.64542 | 0.960288 |
| H             | -1.88297 | 0.849238 | 1.489158 | C | 3.289544 | 2.215214 | 1.699236 |
| H             | -1.76894 | -0.12832 | -1.40632 | C | -2.75351 | 3.394582 | 0.08778  |
| H             | -1.46117 | -1.53962 | 1.311085 | O | -1.33726 | 2.687359 | -1.75563 |
| H             | 3.701756 | -2.12887 | 1.04186  | C | 1.176062 | -4.26099 | 0.190322 |
| H             | 3.848919 | -2.55003 | -0.64559 | O | 4.498075 | -0.7827  | -0.74401 |
| H             | 0.835049 | -0.90802 | -0.6144  | H | 1.123423 | 1.061895 | -0.78252 |
| H             | -0.91755 | -2.529   | -1.52871 | H | 1.864319 | -0.61066 | 1.311488 |
| H             | -0.74788 | -3.50557 | -0.08151 | H | 3.58254  | -0.35005 | 1.571333 |
| H             | -2.96112 | -3.35197 | 0.553369 | H | 1.838615 | 3.9379   | 0.026642 |
| H             | -5.06679 | -2.22934 | 1.235733 | H | 1.08984  | 3.394488 | -1.46901 |
| H             | -3.70873 | -1.68109 | 2.23376  | H | 2.523983 | -0.48803 | -1.26426 |
| H             | -4.33789 | -0.64076 | 0.944969 | H | -0.21268 | 3.362163 | 1.302176 |
| H             | -4.70549 | -2.95718 | -1.15072 | H | -0.47434 | 4.552354 | 0.030329 |
| H             | -4.00686 | -1.38526 | -1.55972 | H | -1.40918 | 1.191107 | 1.316383 |
| H             | -3.11184 | -2.87446 | -1.90952 | H | -1.87526 | 0.210144 | -1.54757 |
| H             | 4.083808 | 2.940897 | 0.032802 | H | -1.66567 | -1.23582 | 1.169026 |
| H             | 3.541904 | 2.054394 | -1.37595 | H | 3.334959 | -2.79939 | 0.55699  |
| H             | 2.669987 | 3.517071 | -0.8642  | H | 3.29493  | -2.90107 | -1.18744 |
| H             | -3.97411 | 2.025171 | -0.86709 | H | 0.594182 | -1.01375 | -0.95743 |
| H             | -3.8681  | 2.766364 | 0.744612 | H | -1.48637 | -2.31875 | -1.68897 |
| H             | -3.50334 | 3.735142 | -0.70082 | H | -1.34166 | -3.28936 | -0.23432 |
| H             | -0.57055 | 1.975857 | -1.51581 | H | -3.85567 | -1.52168 | -0.94182 |
| H             | 2.307321 | -4.14456 | 1.50939  | H | -4.8628  | -3.22815 | 0.643788 |
| H             | 0.878155 | -4.51785 | 0.533921 | H | -3.38823 | -3.80549 | -0.13108 |
| H             | 2.498411 | -4.65528 | -0.16256 | H | -3.34303 | -3.24265 | 1.549686 |
| H             | 4.9852   | -0.65172 | -1.37548 | H | -5.40436 | -0.89412 | 0.901517 |
| 07_1R4R10R_13 |          |          |          | H | -4.04066 | -0.71187 | 2.015513 |
| C             | 2.524909 | 1.345918 | 0.73084  | H | -4.21389 | 0.393953 | 0.645069 |
| C             | 1.628174 | 1.79801  | -0.16159 | H | 3.08942  | 3.282285 | 1.572528 |
| C             | 2.760646 | -0.15645 | 0.870472 | H | 3.042524 | 1.949945 | 2.737019 |
| C             | 1.142023 | 3.201783 | -0.39067 | H | 4.37189  | 2.057044 | 1.592953 |
| C             | 3.10271  | -0.90862 | -0.43211 | H | -3.62827 | 2.860113 | -0.30233 |
| C             | -0.25167 | 3.493121 | 0.213335 | H | -2.85412 | 3.445161 | 1.177745 |
| C             | -1.45049 | 2.673307 | -0.32557 | H | -2.76017 | 4.415616 | -0.30952 |
| C             | -1.50944 | 1.254599 | 0.231534 | H | -2.16868 | 2.340706 | -2.11765 |
| C             | -1.77572 | 0.142578 | -0.46148 | H | 1.765633 | -4.94276 | -0.43832 |
| C             | -1.98938 | -1.24172 | 0.11725  | H | 1.549495 | -4.38726 | 1.216001 |
| C             | 2.81412  | -2.4073  | -0.32961 | H | 0.138823 | -4.60169 | 0.165354 |
| C             | 1.352296 | -2.83223 | -0.27055 | H | 4.672413 | 0.165629 | -0.85882 |

|               |          |          |          |               |          |          |
|---------------|----------|----------|----------|---------------|----------|----------|
| 07_1R4R10R_14 |          |          | H        | 4.974141      | -0.2622  | -1.33534 |
| C             | -2.86179 | 1.092204 | 0.071944 | H             | 4.558586 | 0.623299 |
| C             | -1.56397 | 1.343042 | -0.16663 | H             | -3.70222 | 2.668961 |
| C             | -3.22384 | -0.06416 | 0.991027 | H             | -4.74697 | 1.249532 |
| C             | -0.93514 | 2.336548 | -1.10358 | H             | -4.57068 | 2.376939 |
| C             | -3.58429 | -1.40347 | 0.300672 | H             | 3.235569 | 3.29592  |
| C             | 0.118207 | 3.280149 | -0.48092 | H             | 2.878635 | 3.888761 |
| C             | 1.294502 | 2.644734 | 0.307277 | H             | 2.061498 | 4.613659 |
| C             | 1.8136   | 1.378201 | -0.35544 | H             | 1.538617 | 2.073908 |
| C             | 1.900256 | 0.1785   | 0.227037 | H             | -1.70688 | -2.73876 |
| C             | 2.413204 | -1.09446 | -0.40643 | H             | -1.81822 | -4.13714 |
| C             | -2.49018 | -1.99449 | -0.61378 | H             | -0.23459 | -3.57266 |
| C             | -1.15478 | -2.34601 | 0.019414 | H             | -4.61337 | -0.90161 |
| C             | -0.01043 | -1.93319 | -0.5525  | 07_1R4R10R_15 |          |          |
| C             | 1.40858  | -2.25046 | -0.14412 | C             | -2.6207  | -1.54754 |
| C             | 3.845314 | -1.45049 | 0.106054 | C             | -1.30614 | -1.81336 |
| C             | 4.348128 | -2.8047  | -0.42322 | C             | -3.08686 | -0.23483 |
| C             | 4.862027 | -0.35372 | -0.24661 | C             | -0.62354 | -3.0391  |
| C             | -4.0178  | 1.890131 | -0.48621 | C             | -3.75055 | 0.750429 |
| C             | 2.437894 | 3.675705 | 0.413127 | C             | 0.692615 | -3.42895 |
| O             | 0.7896   | 2.381132 | 1.626461 | C             | 1.965204 | -2.60812 |
| C             | -1.21973 | -3.24065 | 1.235916 | C             | 1.848449 | -1.16344 |
| O             | -4.81544 | -1.31788 | -0.43497 | C             | 2.082525 | -0.08178 |
| H             | -0.84498 | 0.708259 | 0.341521 | C             | 1.918659 | 1.344155 |
| H             | -4.08286 | 0.206656 | 1.62028  | C             | -2.80291 | 1.327519 |
| H             | -2.38434 | -0.2644  | 1.668336 | C             | -1.54829 | 2.059886 |
| H             | -0.4416  | 1.770145 | -1.90874 | C             | -0.34084 | 1.563987 |
| H             | -1.69003 | 2.95924  | -1.59702 | C             | 1.025159 | 2.158427 |
| H             | -3.80603 | -2.12096 | 1.099466 | C             | 3.303509 | 2.015966 |
| H             | 0.54377  | 3.878186 | -1.2968  | C             | 4.179096 | 2.180138 |
| H             | -0.36732 | 3.98348  | 0.206148 | C             | 3.1634   | 3.353075 |
| H             | 2.148178 | 1.500882 | -1.38721 | C             | -3.70891 | -2.47952 |
| H             | 1.553382 | 0.073745 | 1.25629  | C             | 3.187333 | -3.25678 |
| H             | 2.483231 | -0.94002 | -1.49461 | O             | 2.222615 | -2.70066 |
| H             | -2.32238 | -1.2973  | -1.44493 | C             | -1.76368 | 3.365963 |
| H             | -2.92957 | -2.9069  | -1.04562 | O             | -4.33741 | 1.849337 |
| H             | -0.09625 | -1.31608 | -1.44818 | H             | -0.63512 | -1.04131 |
| H             | 1.458922 | -2.52213 | 0.918013 | H             | -2.24951 | 0.276843 |
| H             | 1.74738  | -3.13507 | -0.70051 | H             | -3.83042 | -0.45148 |
| H             | 3.788872 | -1.51865 | 1.204043 | H             | -1.29761 | -3.90246 |
| H             | 5.383692 | -2.97487 | -0.10588 | H             | -0.41657 | -2.90253 |
| H             | 3.752521 | -3.64727 | -0.05941 | H             | -4.54687 | 0.219268 |
| H             | 4.331396 | -2.82785 | -1.52103 | H             | 0.544382 | -3.39167 |
| H             | 5.848088 | -0.59416 | 0.167964 | H             | 0.919658 | -4.47227 |

|               |          |          |          |               |          |          |          |
|---------------|----------|----------|----------|---------------|----------|----------|----------|
| H             | 1.536196 | -1.03387 | 1.551639 | C             | 3.606998 | 2.102243 | -0.37142 |
| H             | 2.41174  | -0.21833 | -1.26559 | C             | -2.79305 | 3.355624 | -0.44395 |
| H             | 1.396847 | 1.314216 | 1.207442 | O             | -0.82452 | 2.636989 | -1.53439 |
| H             | -3.41038 | 2.013124 | -1.71424 | C             | 1.092208 | -4.27111 | 0.365011 |
| H             | -2.5152  | 0.497168 | -1.75906 | O             | 4.595661 | -0.90959 | -0.55306 |
| H             | -0.32741 | 0.611279 | -1.50559 | H             | 0.809225 | 1.366378 | 1.572115 |
| H             | 1.540637 | 2.213889 | -1.71041 | H             | 2.073361 | -0.43062 | 1.475753 |
| H             | 0.945941 | 3.187276 | -0.37764 | H             | 3.797533 | -0.05827 | 1.516079 |
| H             | 3.828951 | 1.324528 | 1.188267 | H             | 1.391767 | 4.061122 | 1.388748 |
| H             | 5.16851  | 2.563482 | -0.46281 | H             | 1.287294 | 3.722764 | -0.32377 |
| H             | 4.328533 | 1.228826 | -1.26152 | H             | 2.637691 | -0.66214 | -1.18676 |
| H             | 3.742202 | 2.89086  | -1.4509  | H             | -0.91782 | 3.343351 | 1.768849 |
| H             | 4.146815 | 3.71776  | 1.579044 | H             | -0.80049 | 4.594674 | 0.540798 |
| H             | 2.719046 | 4.131219 | 0.627328 | H             | -1.7718  | 1.194778 | 1.390736 |
| H             | 2.537598 | 3.248528 | 2.153804 | H             | -1.68986 | 0.260114 | -1.52152 |
| H             | -3.32937 | -3.46955 | -0.39998 | H             | -1.93128 | -1.23492 | 1.169051 |
| H             | -4.48094 | -2.60861 | 0.636828 | H             | 3.217528 | -2.70572 | 1.011178 |
| H             | -4.21962 | -2.0794  | -1.02052 | H             | 3.318759 | -3.09869 | -0.68596 |
| H             | 4.096257 | -2.71331 | 0.456863 | H             | 0.628782 | -0.94462 | -0.61155 |
| H             | 3.08841  | -3.23955 | 1.822925 | H             | -1.3345  | -2.28945 | -1.63973 |
| H             | 3.288746 | -4.29851 | 0.408677 | H             | -1.35854 | -3.2561  | -0.17836 |
| H             | 1.522024 | -2.20525 | -1.80081 | H             | -3.74988 | -1.50355 | -1.27089 |
| H             | -2.3637  | 4.053218 | -0.53402 | H             | -4.99268 | -3.22821 | 0.106658 |
| H             | -2.33628 | 3.203902 | 0.997419 | H             | -3.3998  | -3.79062 | -0.39862 |
| H             | -0.82815 | 3.870074 | 0.333359 | H             | -3.65593 | -3.23412 | 1.265538 |
| H             | -4.93823 | 1.476364 | 1.340277 | H             | -5.58246 | -0.888   | 0.288898 |
| 07_1R4R10R_16 |          |          |          | H             | -4.42781 | -0.71699 | 1.61969  |
| C             | 2.578758 | 1.393724 | 0.477212 | H             | -4.36703 | 0.401671 | 0.248836 |
| C             | 1.444954 | 1.965348 | 0.920162 | H             | 4.535623 | 2.241642 | 0.199762 |
| C             | 2.900295 | -0.03236 | 0.87918  | H             | 3.883295 | 1.507776 | -1.24901 |
| C             | 0.949643 | 3.367682 | 0.65656  | H             | 3.27182  | 3.086929 | -0.70671 |
| C             | 3.184771 | -0.99332 | -0.29203 | H             | -3.40939 | 2.762602 | -1.12638 |
| C             | -0.57877 | 3.539459 | 0.742443 | H             | -3.32741 | 3.459125 | 0.506599 |
| C             | -1.43021 | 2.674775 | -0.23208 | H             | -2.65183 | 4.354396 | -0.87238 |
| C             | -1.65587 | 1.267409 | 0.30844  | H             | -0.02213 | 2.09473  | -1.44648 |
| C             | -1.78435 | 0.165564 | -0.43745 | H             | 1.526144 | -4.48959 | 1.350275 |
| C             | -2.08425 | -1.22431 | 0.079242 | H             | 0.037629 | -4.55205 | 0.394478 |
| C             | 2.794165 | -2.44336 | 0.029211 | H             | 1.595041 | -4.93908 | -0.34855 |
| C             | 1.321204 | -2.82231 | -0.00477 | H             | 4.772366 | -1.41084 | -1.36554 |
| C             | 0.349741 | -1.96857 | -0.37308 | 07_1R4R10R_17 |          |          |          |
| C             | -1.1182  | -2.2618  | -0.55786 | C             | 2.317026 | 1.921838 | 0.296526 |
| C             | -3.5795  | -1.60016 | -0.18707 | C             | 0.982172 | 2.047801 | 0.364204 |
| C             | -3.91684 | -3.04731 | 0.215296 | C             | 2.965579 | 0.676448 | 0.866228 |
| C             | -4.54208 | -0.64018 | 0.529918 | C             | 0.111014 | 3.138221 | -0.21366 |

|   |          |          |          |               |          |          |          |
|---|----------|----------|----------|---------------|----------|----------|----------|
| C | 3.538879 | -0.27073 | -0.2112  | H             | -4.48407 | 1.915621 | 0.342033 |
| C | -1.27545 | 3.254831 | 0.449086 | H             | -3.65259 | 2.59529  | 1.749832 |
| C | -2.34138 | 2.209336 | 0.031035 | H             | -3.97265 | 3.620141 | 0.331579 |
| C | -2.00493 | 0.797368 | 0.483843 | H             | -3.14568 | 1.696461 | -1.67534 |
| C | -1.81753 | -0.26463 | -0.30679 | H             | 2.775357 | -4.4415  | -0.11931 |
| C | -1.57316 | -1.67883 | 0.171728 | H             | 2.456388 | -3.94677 | 1.537619 |
| C | 3.413572 | -1.75229 | 0.173409 | H             | 1.108531 | -4.3562  | 0.468637 |
| C | 2.046363 | -2.41445 | 0.074445 | H             | 5.25853  | -0.40535 | -1.1442  |
| C | 0.949274 | -1.78568 | -0.38533 | 07_1R4R10R_18 |          |          |          |
| C | -0.42296 | -2.36758 | -0.61726 | C             | -2.46474 | 1.781115 | -0.37357 |
| C | -2.86905 | -2.55523 | 0.128394 | C             | -1.14487 | 2.020706 | -0.41661 |
| C | -3.90075 | -2.09545 | 1.167705 | C             | -2.98639 | 0.465171 | -0.9122  |
| C | -3.51033 | -2.6458  | -1.26604 | C             | -0.38696 | 3.201717 | 0.14153  |
| C | 3.240135 | 2.915319 | -0.3646  | C             | -3.48086 | -0.49824 | 0.189154 |
| C | -3.69553 | 2.610971 | 0.654911 | C             | 1.009086 | 3.398768 | -0.47832 |
| O | -2.43654 | 2.299348 | -1.39755 | C             | 2.132492 | 2.453857 | 0.017812 |
| C | 2.082134 | -3.86361 | 0.508047 | C             | 1.930948 | 1.002844 | -0.39425 |
| O | 4.921638 | 0.085161 | -0.37706 | C             | 1.843593 | -0.0485  | 0.426423 |
| H | 0.441689 | 1.248369 | 0.864484 | C             | 1.785746 | -1.50228 | 0.007852 |
| H | 2.228818 | 0.129287 | 1.462995 | C             | -3.20897 | -1.97124 | -0.14834 |
| H | 3.800495 | 0.930669 | 1.534959 | C             | -1.78912 | -2.50223 | -0.00661 |
| H | 0.611525 | 4.111002 | -0.12677 | C             | -0.75987 | -1.77017 | 0.4593   |
| H | -0.04026 | 2.97491  | -1.28957 | C             | 0.641538 | -2.24905 | 0.752372 |
| H | 3.01297  | -0.10323 | -1.16215 | C             | 3.171919 | -2.19085 | 0.254298 |
| H | -1.17178 | 3.224432 | 1.541594 | C             | 3.165965 | -3.69615 | -0.07011 |
| H | -1.69577 | 4.237413 | 0.201774 | C             | 4.292626 | -1.51274 | -0.55064 |
| H | -1.96029 | 0.668678 | 1.566947 | C             | -3.4857  | 2.710751 | 0.234105 |
| H | -1.8472  | -0.11945 | -1.38738 | C             | 3.475529 | 2.938312 | -0.57098 |
| H | -1.26839 | -1.63604 | 1.227071 | O             | 2.164287 | 2.601851 | 1.444556 |
| H | 3.808068 | -1.87968 | 1.19365  | C             | -1.6922  | -3.96029 | -0.40146 |
| H | 4.10342  | -2.32612 | -0.46787 | O             | -4.89374 | -0.2729  | 0.329065 |
| H | 1.03338  | -0.73557 | -0.65809 | H             | -0.52608 | 1.255428 | -0.87917 |
| H | -0.64792 | -2.29056 | -1.69214 | H             | -2.19321 | -0.02842 | -1.48295 |
| H | -0.43937 | -3.43673 | -0.38298 | H             | -3.83235 | 0.619006 | -1.5973  |
| H | -2.55189 | -3.56998 | 0.412145 | H             | -0.95901 | 4.126508 | -0.00745 |
| H | -4.76892 | -2.76545 | 1.174503 | H             | -0.26431 | 3.097532 | 1.228275 |
| H | -3.47381 | -2.09008 | 2.178102 | H             | -2.98661 | -0.25082 | 1.13954  |
| H | -4.26021 | -1.08279 | 0.951932 | H             | 0.947831 | 3.318917 | -1.57156 |
| H | -4.36077 | -3.33756 | -1.24986 | H             | 1.345347 | 4.419228 | -0.25715 |
| H | -3.88758 | -1.67018 | -1.59601 | H             | 1.927307 | 0.836372 | -1.47311 |
| H | -2.80622 | -3.00749 | -2.02334 | H             | 1.843216 | 0.127311 | 1.504149 |
| H | 2.705209 | 3.760569 | -0.80604 | H             | 1.58501  | -1.55353 | -1.07293 |
| H | 3.965176 | 3.310311 | 0.361171 | H             | -3.57164 | -2.16414 | -1.16996 |
| H | 3.834492 | 2.434278 | -1.15118 | H             | -3.85367 | -2.58932 | 0.498812 |

|               |          |          |          |               |          |          |          |
|---------------|----------|----------|----------|---------------|----------|----------|----------|
| H             | -0.9357  | -0.72362 | 0.699561 | H             | 0.594859 | 1.44161  | 1.48406  |
| H             | 0.825789 | -2.13779 | 1.834049 | H             | 2.147998 | -0.11033 | 1.437793 |
| H             | 0.719522 | -3.31643 | 0.545264 | H             | 3.782699 | 0.54426  | 1.476778 |
| H             | 3.406954 | -2.07748 | 1.324388 | H             | 0.770576 | 4.221197 | 1.15342  |
| H             | 4.183212 | -4.09976 | -0.00578 | H             | 0.607079 | 3.739375 | -0.51776 |
| H             | 2.544594 | -4.27872 | 0.616121 | H             | 2.725927 | -0.31303 | -1.21707 |
| H             | 2.804149 | -3.87642 | -1.09123 | H             | -1.36486 | 3.16249  | 1.757188 |
| H             | 5.259146 | -1.98273 | -0.33451 | H             | -1.52498 | 4.359149 | 0.479791 |
| H             | 4.110249 | -1.61139 | -1.62927 | H             | -1.87478 | 0.866208 | 1.487156 |
| H             | 4.374995 | -0.44646 | -0.32462 | H             | -1.77066 | -0.11756 | -1.40672 |
| H             | -3.03604 | 3.613368 | 0.656705 | H             | -1.47781 | -1.52617 | 1.313789 |
| H             | -4.22509 | 3.016995 | -0.5195  | H             | 3.692853 | -2.18017 | 1.002293 |
| H             | -4.05414 | 2.205818 | 1.025009 | H             | 3.81006  | -2.56894 | -0.70008 |
| H             | 4.302314 | 2.317518 | -0.20467 | H             | 0.818749 | -0.92671 | -0.63959 |
| H             | 3.476703 | 2.882769 | -1.66533 | H             | -0.95319 | -2.53766 | -1.52194 |
| H             | 3.661762 | 3.976157 | -0.2745  | H             | -0.78451 | -3.50281 | -0.06697 |
| H             | 2.914704 | 2.078352 | 1.77057  | H             | -2.99971 | -3.3233  | 0.558522 |
| H             | -2.32952 | -4.58263 | 0.242496 | H             | -5.09076 | -2.17532 | 1.24377  |
| H             | -2.05886 | -4.10279 | -1.42716 | H             | -3.72477 | -1.64395 | 2.240123 |
| H             | -0.67826 | -4.36159 | -0.35391 | H             | -4.34306 | -0.5957  | 0.952404 |
| H             | -5.19141 | -0.76791 | 1.109462 | H             | -4.74186 | -2.90761 | -1.14272 |
| 07_1R4R10R_19 |          |          |          | H             | -4.02504 | -1.34413 | -1.55288 |
| C             | 2.345689 | 1.751448 | 0.403229 | H             | -3.14869 | -2.84391 | -1.90424 |
| C             | 1.124093 | 2.125918 | 0.821966 | H             | 2.743689 | 3.523218 | -0.79795 |
| C             | 2.899289 | 0.406528 | 0.831132 | H             | 4.136123 | 2.908134 | 0.104134 |
| C             | 0.394752 | 3.41278  | 0.50739  | H             | 3.603656 | 2.061608 | -1.33387 |
| C             | 3.333722 | -0.5208  | -0.33071 | H             | -3.95683 | 2.062439 | -0.86154 |
| C             | -1.1325  | 3.359187 | 0.701558 | H             | -3.83653 | 2.802828 | 0.749602 |
| C             | -1.9152  | 2.338053 | -0.17366 | H             | -3.46748 | 3.767353 | -0.69764 |
| C             | -1.84092 | 0.92866  | 0.398566 | H             | -0.55911 | 1.97342  | -1.52716 |
| C             | -1.789   | -0.19868 | -0.31879 | H             | 2.459333 | -4.67908 | -0.14006 |
| C             | -1.76376 | -1.598   | 0.254606 | H             | 2.266797 | -4.14574 | 1.524853 |
| C             | 3.204456 | -2.00878 | 0.028112 | H             | 0.838018 | -4.52368 | 0.550501 |
| C             | 1.814052 | -2.62654 | 0.059416 | H             | 5.259261 | -0.3879  | -0.0097  |
| C             | 0.711841 | -1.96545 | -0.33345 | 07_1R4R10R_20 |          |          |          |
| C             | -0.69922 | -2.4814  | -0.45183 | C             | -2.73615 | 1.334432 | -0.44989 |
| C             | -3.16726 | -2.28799 | 0.224766 | C             | -1.44204 | 1.564141 | -0.17633 |
| C             | -4.1354  | -1.63735 | 1.222937 | C             | -3.14398 | 0.033834 | -1.11819 |
| C             | -3.79927 | -2.34847 | -1.17519 | C             | -0.81921 | 2.765632 | 0.487746 |
| C             | 3.23968  | 2.61037  | -0.45849 | C             | -3.7172  | -1.03743 | -0.14308 |
| C             | -3.38943 | 2.770211 | -0.24972 | C             | 0.495073 | 3.250778 | -0.1654  |
| O             | -1.44518 | 2.373147 | -1.53026 | C             | 1.782977 | 2.433698 | 0.140925 |
| C             | 1.82927  | -4.06666 | 0.520079 | C             | 1.74875  | 1.044568 | -0.47534 |
| O             | 4.669895 | -0.23037 | -0.76596 | C             | 2.052553 | -0.09396 | 0.15549  |

|   |          |          |          |               |          |          |          |
|---|----------|----------|----------|---------------|----------|----------|----------|
| C | 2.052094 | -1.47355 | -0.45823 | H             | -2.06326 | -2.28194 | 2.656577 |
| C | -2.81439 | -2.27878 | -0.01819 | H             | -0.42961 | -1.62065 | 2.474616 |
| C | -1.44059 | -2.08608 | 0.597148 | H             | -5.59647 | -0.80839 | -0.64438 |
| C | -0.33941 | -2.38616 | -0.11433 | 07_1R4R10R_21 |          |          |          |
| C | 1.102801 | -2.43486 | 0.322425 | C             | 2.840252 | 0.79567  | 0.650519 |
| C | 3.488754 | -2.07467 | -0.57429 | C             | 1.94724  | 1.453623 | -0.10709 |
| C | 4.366353 | -1.26642 | -1.5399  | C             | 2.706101 | -0.71995 | 0.790827 |
| C | 4.194795 | -2.25935 | 0.778935 | C             | 1.775141 | 2.929996 | -0.33595 |
| C | -3.87428 | 2.269941 | -0.12034 | C             | 2.799293 | -1.51941 | -0.52696 |
| C | 2.997497 | 3.196765 | -0.41443 | C             | 0.504788 | 3.528354 | 0.317265 |
| O | 2.002196 | 2.376042 | 1.558432 | C             | -0.87235 | 2.994847 | -0.1724  |
| C | -1.43089 | -1.63101 | 2.037398 | C             | -1.18165 | 1.603197 | 0.36326  |
| O | -4.97772 | -1.5542  | -0.59639 | C             | -1.79591 | 0.623065 | -0.30899 |
| H | -0.74228 | 0.778871 | -0.45085 | C             | -2.17622 | -0.71954 | 0.277806 |
| H | -2.28772 | -0.38953 | -1.65517 | C             | 2.171351 | -2.91044 | -0.40854 |
| H | -3.91573 | 0.233944 | -1.87467 | C             | 0.654364 | -2.98294 | -0.27275 |
| H | -1.52082 | 3.606635 | 0.496423 | C             | -0.1586  | -1.98295 | -0.65534 |
| H | -0.62203 | 2.55086  | 1.550727 | C             | -1.66188 | -1.90234 | -0.5951  |
| H | -3.85285 | -0.58519 | 0.851027 | C             | -3.71665 | -0.78855 | 0.545059 |
| H | 0.361374 | 3.309083 | -1.25378 | C             | -4.56931 | -0.80785 | -0.73372 |
| H | 0.68927  | 4.272331 | 0.183876 | C             | -4.0927  | -1.95999 | 1.467095 |
| H | 1.4695   | 1.016951 | -1.52987 | C             | 3.954726 | 1.439414 | 1.437217 |
| H | 2.344228 | -0.04059 | 1.204826 | C             | -1.97173 | 3.959674 | 0.30678  |
| H | 1.671552 | -1.3913  | -1.48652 | O             | -0.94633 | 3.036888 | -1.60649 |
| H | -2.71822 | -2.71477 | -1.02025 | C             | 0.177128 | -4.29985 | 0.294961 |
| H | -3.37289 | -3.0058  | 0.589727 | O             | 4.166443 | -1.72266 | -0.91167 |
| H | -0.49216 | -2.70238 | -1.14864 | H             | 1.188661 | 0.844178 | -0.59386 |
| H | 1.20206  | -2.25527 | 1.397995 | H             | 1.740668 | -0.94342 | 1.260536 |
| H | 1.456447 | -3.46368 | 0.153326 | H             | 3.48007  | -1.11555 | 1.460012 |
| H | 3.353735 | -3.07532 | -1.01228 | H             | 2.63679  | 3.49332  | 0.038126 |
| H | 5.339716 | -1.75213 | -1.67838 | H             | 1.729627 | 3.13183  | -1.41641 |
| H | 3.89407  | -1.17453 | -2.5258  | H             | 2.294651 | -0.96059 | -1.32583 |
| H | 4.547065 | -0.25372 | -1.1616  | H             | 0.562391 | 3.395    | 1.405424 |
| H | 5.152319 | -2.77515 | 0.64049  | H             | 0.517162 | 4.609427 | 0.128993 |
| H | 4.409655 | -1.29602 | 1.256537 | H             | -0.90333 | 1.439836 | 1.405634 |
| H | 3.59728  | -2.85633 | 1.477073 | H             | -2.07909 | 0.801142 | -1.34751 |
| H | -3.55189 | 3.18021  | 0.390927 | H             | -1.68956 | -0.80198 | 1.260088 |
| H | -4.41157 | 2.564797 | -1.0326  | H             | 2.629682 | -3.42101 | 0.451293 |
| H | -4.61283 | 1.776026 | 0.527385 | H             | 2.481475 | -3.49332 | -1.28866 |
| H | 3.919119 | 2.658744 | -0.17272 | H             | 0.299944 | -1.08682 | -1.06606 |
| H | 2.928734 | 3.299305 | -1.50231 | H             | -2.04795 | -1.7708  | -1.61709 |
| H | 3.049009 | 4.198229 | 0.02699  | H             | -2.09178 | -2.83632 | -0.22358 |
| H | 1.309694 | 1.809598 | 1.935832 | H             | -3.95865 | 0.13688  | 1.086913 |
| H | -1.84136 | -0.61674 | 2.126374 | H             | -5.63486 | -0.7555  | -0.48082 |



|               |          |          |          |               |          |          |          |
|---------------|----------|----------|----------|---------------|----------|----------|----------|
| H             | -4.34369 | 0.04011  | -1.38974 | H             | 3.013131 | -0.10306 | -1.16224 |
| H             | -4.41476 | -1.72927 | -1.30765 | H             | -1.17188 | 3.224544 | 1.541453 |
| H             | -5.15193 | -1.90298 | 1.745049 | H             | -1.69584 | 4.237362 | 0.201508 |
| H             | -3.93667 | -2.9318  | 0.983762 | H             | -1.96033 | 0.668645 | 1.56697  |
| H             | -3.50279 | -1.9465  | 2.39162  | H             | -1.84726 | -0.11942 | -1.38737 |
| H             | 4.013985 | 2.521664 | 1.295136 | H             | -1.26804 | -1.63609 | 1.226917 |
| H             | 3.831571 | 1.248005 | 2.512396 | H             | 3.808207 | -1.87967 | 1.193473 |
| H             | 4.926259 | 1.007003 | 1.159712 | H             | 4.10344  | -2.326   | -0.4681  |
| H             | -2.95019 | 3.611657 | -0.03724 | H             | 1.03365  | -0.7355  | -0.6587  |
| H             | -1.9879  | 4.018853 | 1.400136 | H             | -0.64791 | -2.29012 | -1.69247 |
| H             | -1.79262 | 4.964011 | -0.09312 | H             | -0.4392  | -3.43661 | -0.38361 |
| H             | -0.37469 | 2.329819 | -1.94693 | H             | -2.55153 | -3.57006 | 0.412262 |
| H             | 0.569775 | -5.13851 | -0.29674 | H             | -4.76853 | -2.7657  | 1.174754 |
| H             | 0.55447  | -4.44077 | 1.317254 | H             | -3.4734  | -2.0901  | 2.17818  |
| H             | -0.91062 | -4.39272 | 0.322179 | H             | -4.26005 | -1.08299 | 0.952007 |
| H             | 4.552564 | -0.84299 | -1.05153 | H             | -4.36063 | -3.33786 | -1.24957 |
| 07_1R4R10R_22 |          |          |          | H             | -3.88752 | -1.6705  | -1.59593 |
| C             | 2.316929 | 1.921806 | 0.296601 | H             | -2.80616 | -3.00781 | -2.02324 |
| C             | 0.98206  | 2.047721 | 0.364229 | H             | 2.705118 | 3.760605 | -0.80588 |
| C             | 2.965486 | 0.676422 | 0.866246 | H             | 3.964995 | 3.310351 | 0.361439 |
| C             | 0.110875 | 3.138022 | -0.21383 | H             | 3.834519 | 2.434378 | -1.15094 |
| C             | 3.538949 | -0.2706  | -0.21124 | H             | -4.48421 | 1.915618 | 0.342277 |
| C             | -1.27556 | 3.254792 | 0.448937 | H             | -3.65256 | 2.595276 | 1.749991 |
| C             | -2.34153 | 2.20929  | 0.031058 | H             | -3.97273 | 3.620124 | 0.331759 |
| C             | -2.00502 | 0.797325 | 0.483865 | H             | -3.14594 | 1.696225 | -1.67521 |
| C             | -1.81755 | -0.26464 | -0.30679 | H             | 2.776605 | -4.44109 | -0.11755 |
| C             | -1.57297 | -1.67884 | 0.17162  | H             | 2.454539 | -3.94597 | 1.53867  |
| C             | 3.413653 | -1.75219 | 0.17326  | H             | 1.108727 | -4.35635 | 0.46749  |
| C             | 2.046414 | -2.4143  | 0.074309 | H             | 5.25872  | -0.40528 | -1.14397 |
| C             | 0.949419 | -1.78555 | -0.38573 | 07_1R4R10R_23 |          |          |          |
| C             | -0.42283 | -2.3674  | -0.61764 | C             | -2.66076 | 1.457253 | -0.11043 |
| C             | -2.86878 | -2.55535 | 0.128455 | C             | -1.32456 | 1.583687 | -0.13031 |
| C             | -3.90044 | -2.09559 | 1.167823 | C             | -3.35205 | 0.452018 | -1.01406 |
| C             | -3.51021 | -2.64607 | -1.2659  | C             | -0.45933 | 2.523818 | 0.669184 |
| C             | 3.24004  | 2.915358 | -0.36442 | C             | -3.91446 | -0.80844 | -0.30511 |
| C             | -3.69561 | 2.610945 | 0.655071 | C             | 0.701449 | 3.139792 | -0.14612 |
| O             | -2.43689 | 2.299254 | -1.39753 | C             | 2.037739 | 2.361437 | -0.09725 |
| C             | 2.08204  | -3.8633  | 0.50841  | C             | 1.914097 | 0.940431 | -0.62046 |
| O             | 4.921685 | 0.085343 | -0.37696 | C             | 1.999417 | -0.17018 | 0.118715 |
| H             | 0.44159  | 1.248234 | 0.86444  | C             | 1.967057 | -1.58632 | -0.40449 |
| H             | 2.228649 | 0.129155 | 1.46282  | C             | -2.97652 | -2.0286  | -0.34346 |
| H             | 3.800307 | 0.930576 | 1.535135 | C             | -1.65829 | -1.9609  | 0.404817 |
| H             | 0.611392 | 4.110827 | -0.12723 | C             | -0.51514 | -2.25445 | -0.23869 |
| H             | -0.04046 | 2.974443 | -1.28969 | C             | 0.875935 | -2.43346 | 0.313427 |

|               |          |          |          |   |          |          |          |
|---------------|----------|----------|----------|---|----------|----------|----------|
| C             | 3.365038 | -2.2808  | -0.31879 | C | 1.692153 | -2.2425  | -0.25394 |
| C             | 4.390638 | -1.61073 | -1.24324 | C | 3.687613 | -0.78063 | -0.36354 |
| C             | 3.913295 | -2.39226 | 1.112889 | C | 0.60802  | -3.12656 | 0.3138   |
| C             | -3.59031 | 2.282646 | 0.74987  | C | 3.910216 | 0.744426 | -0.27793 |
| C             | 3.095027 | 3.113276 | -0.9304  | C | -0.66141 | -3.25289 | -0.56775 |
| O             | 2.429098 | 2.378873 | 1.284952 | C | -1.90982 | -2.47528 | -0.09237 |
| C             | -1.759   | -1.66713 | 1.882545 | C | -1.65024 | -0.98839 | 0.063409 |
| O             | -5.10674 | -1.27133 | -0.96045 | C | -2.29887 | 0.003055 | -0.55931 |
| H             | -0.77701 | 0.915838 | -0.79266 | C | -2.12226 | 1.496553 | -0.35507 |
| H             | -2.67974 | 0.135926 | -1.82066 | C | 2.826753 | 1.593581 | -0.97343 |
| H             | -4.20326 | 0.953447 | -1.50026 | C | 1.657414 | 2.015346 | -0.10504 |
| H             | -1.06296 | 3.335845 | 1.087596 | C | 0.430501 | 1.517597 | -0.32283 |
| H             | -0.02497 | 1.997004 | 1.529957 | C | -0.83991 | 1.856659 | 0.424419 |
| H             | -4.15321 | -0.56275 | 0.740684 | C | -3.39142 | 2.138282 | 0.301903 |
| H             | 0.403223 | 3.263984 | -1.19452 | C | -3.37826 | 3.673592 | 0.197373 |
| H             | 0.919959 | 4.143564 | 0.238627 | C | -4.7111  | 1.611625 | -0.28815 |
| H             | 1.7767   | 0.857508 | -1.7     | C | 2.463823 | -1.11347 | 1.867608 |
| H             | 2.114934 | -0.06147 | 1.19754  | C | -3.08927 | -2.8026  | -1.01873 |
| H             | 1.711135 | -1.55064 | -1.47362 | O | -2.19302 | -3.00791 | 1.226828 |
| H             | -2.79532 | -2.26852 | -1.39842 | C | 1.969473 | 3.045966 | 0.956038 |
| H             | -3.56252 | -2.86433 | 0.068842 | O | 5.139092 | 1.06734  | -0.9507  |
| H             | -0.58881 | -2.45791 | -1.30953 | H | 1.859362 | -2.38238 | -1.32449 |
| H             | 0.907966 | -2.23889 | 1.39038  | H | 4.609934 | -1.24529 | 0.028268 |
| H             | 1.145333 | -3.49444 | 0.188264 | H | 3.637124 | -1.04736 | -1.42636 |
| H             | 3.208102 | -3.30451 | -0.69105 | H | 1.034994 | -4.13595 | 0.416491 |
| H             | 5.338375 | -2.16229 | -1.23663 | H | 0.318506 | -2.83158 | 1.32609  |
| H             | 4.030318 | -1.57499 | -2.27874 | H | 3.99236  | 1.04466  | 0.777285 |
| H             | 4.598153 | -0.58148 | -0.92845 | H | -0.43925 | -2.95024 | -1.59838 |
| H             | 4.846213 | -2.96816 | 1.119955 | H | -0.96144 | -4.30697 | -0.60911 |
| H             | 4.135847 | -1.40498 | 1.535334 | H | -0.87672 | -0.75931 | 0.792912 |
| H             | 3.209826 | -2.89506 | 1.785776 | H | -3.05435 | -0.2591  | -1.29699 |
| H             | -3.06289 | 2.969292 | 1.416015 | H | -2.03917 | 1.941964 | -1.36119 |
| H             | -4.27305 | 2.875445 | 0.124212 | H | 2.466832 | 1.056102 | -1.85892 |
| H             | -4.22579 | 1.643414 | 1.377693 | H | 3.340502 | 2.495497 | -1.33499 |
| H             | 4.068779 | 2.613673 | -0.85643 | H | 0.324618 | 0.777953 | -1.11474 |
| H             | 2.817821 | 3.150277 | -1.99003 | H | -0.8671  | 1.343955 | 1.398442 |
| H             | 3.203135 | 4.138988 | -0.56199 | H | -0.85229 | 2.924903 | 0.660095 |
| H             | 3.255426 | 1.872203 | 1.352306 | H | -3.37086 | 1.864256 | 1.36795  |
| H             | -2.09947 | -0.63771 | 2.051303 | H | -4.26605 | 4.096743 | 0.681746 |
| H             | -2.49507 | -2.32786 | 2.361071 | H | -2.50242 | 4.127722 | 0.670347 |
| H             | -0.80844 | -1.78866 | 2.407027 | H | -3.39239 | 3.989679 | -0.85407 |
| H             | -5.75336 | -0.54865 | -0.92746 | H | -5.56255 | 2.139195 | 0.15707  |
| 07_1R4R10R_24 |          |          |          | H | -4.75326 | 1.775461 | -1.37331 |
| C             | 2.522473 | -1.40156 | 0.386036 | H | -4.85177 | 0.542443 | -0.10318 |

|               |          |          |          |               |          |          |          |
|---------------|----------|----------|----------|---------------|----------|----------|----------|
| H             | 1.701659 | -1.70279 | 2.382291 | H             | -1.42753 | -1.42364 | 1.240836 |
| H             | 3.430271 | -1.32822 | 2.34506  | H             | 3.605182 | -2.12315 | 1.11834  |
| H             | 2.248124 | -0.05405 | 2.055965 | H             | 3.830705 | -2.56802 | -0.55425 |
| H             | -4.00875 | -2.31665 | -0.6727  | H             | 0.899983 | -0.73626 | -0.67454 |
| H             | -2.9013  | -2.48118 | -2.04895 | H             | -0.92429 | -2.14331 | -1.68543 |
| H             | -3.25821 | -3.88375 | -1.02092 | H             | -0.78747 | -3.30251 | -0.37957 |
| H             | -2.91038 | -2.46728 | 1.596621 | H             | -3.81604 | -1.42406 | 0.716109 |
| H             | 2.406197 | 3.947351 | 0.503549 | H             | -4.76764 | -2.6861  | -1.17445 |
| H             | 1.086805 | 3.347153 | 1.525677 | H             | -3.77688 | -1.35411 | -1.78611 |
| H             | 2.711032 | 2.674093 | 1.675647 | H             | -3.15937 | -3.0145  | -1.82671 |
| H             | 5.836089 | 0.510713 | -0.56718 | H             | -4.20018 | -3.81948 | 1.047091 |
| 07_1R4R10R_25 |          |          |          | H             | -2.5935  | -4.22714 | 0.441564 |
| C             | 2.415821 | 1.801263 | 0.304533 | H             | -2.76312 | -3.32621 | 1.95853  |
| C             | 1.10643  | 2.062313 | 0.443879 | H             | 2.915512 | 3.593577 | -0.82733 |
| C             | 2.970044 | 0.49805  | 0.842516 | H             | 4.181039 | 3.03907  | 0.287223 |
| C             | 0.330337 | 3.243865 | -0.09285 | H             | 3.909931 | 2.173494 | -1.21214 |
| C             | 3.440055 | -0.4776  | -0.25939 | H             | -4.35106 | 2.355725 | 0.361885 |
| C             | -1.05221 | 3.444588 | 0.556271 | H             | -3.49903 | 2.957889 | 1.79234  |
| C             | -2.18801 | 2.497407 | 0.092211 | H             | -3.71778 | 4.019176 | 0.381591 |
| C             | -1.97259 | 1.055544 | 0.521303 | H             | -2.99047 | 2.081956 | -1.64106 |
| C             | -1.84509 | -0.00294 | -0.28452 | H             | 2.34483  | -4.57562 | -0.18423 |
| C             | -1.74741 | -1.43815 | 0.189062 | H             | 2.085745 | -4.06791 | 1.479187 |
| C             | 3.202    | -1.94987 | 0.108402 | H             | 0.697073 | -4.35951 | 0.423606 |
| C             | 1.783927 | -2.49779 | 0.029713 | H             | 5.12303  | -0.74137 | -1.23064 |
| C             | 0.734722 | -1.77809 | -0.40715 | 07_1R4R10R_26 |          |          |          |
| C             | -0.68678 | -2.24013 | -0.61475 | C             | 2.691938 | 1.070063 | 0.635914 |
| C             | -3.15743 | -2.1185  | 0.175229 | C             | 1.784106 | 1.62244  | -0.18625 |
| C             | -3.74304 | -2.30008 | -1.23396 | C             | 2.744032 | -0.44981 | 0.783534 |
| C             | -3.17356 | -3.44693 | 0.94855  | C             | 1.461152 | 3.073609 | -0.41209 |
| C             | 3.39364  | 2.70609  | -0.40401 | C             | 2.942764 | -1.24761 | -0.52259 |
| C             | -3.52061 | 2.989063 | 0.697135 | C             | 0.159581 | 3.55087  | 0.276234 |
| O             | -2.2443  | 2.623846 | -1.33573 | C             | -1.17185 | 2.89499  | -0.16833 |
| C             | 1.707762 | -3.94784 | 0.45459  | C             | -1.35778 | 1.487581 | 0.382855 |
| O             | 4.843948 | -0.23487 | -0.45075 | C             | -1.74041 | 0.408706 | -0.30774 |
| H             | 0.514043 | 1.323387 | 0.97802  | C             | -2.052   | -0.94424 | 0.300856 |
| H             | 2.202892 | 0.005509 | 1.448542 | C             | 2.482926 | -2.70199 | -0.39181 |
| H             | 3.837898 | 0.672138 | 1.495077 | C             | 0.98503  | -2.95021 | -0.26076 |
| H             | 0.904824 | 4.168927 | 0.047107 | C             | 0.067776 | -2.02967 | -0.60293 |
| H             | 0.185763 | 3.143985 | -1.17708 | C             | -1.43489 | -2.10379 | -0.53204 |
| H             | 2.911064 | -0.25263 | -1.19671 | C             | -3.59053 | -1.10767 | 0.531746 |
| H             | -0.96708 | 3.371725 | 1.648431 | C             | -4.41393 | -1.13501 | -0.76568 |
| H             | -1.39128 | 4.46452  | 0.336509 | C             | -3.92326 | -2.32086 | 1.415127 |
| H             | -1.97152 | 0.902202 | 1.602592 | C             | 3.647647 | 1.843121 | 1.511832 |
| H             | -1.83064 | 0.158823 | -1.36301 | C             | -2.34035 | 3.762002 | 0.351914 |

|               |          |          |          |   |          |          |          |
|---------------|----------|----------|----------|---|----------|----------|----------|
| O             | -1.17193 | 2.914834 | -1.60255 | C | -1.2797  | 2.853403 | -0.10113 |
| C             | 0.656344 | -4.33139 | 0.256633 | C | -1.57118 | 1.46138  | 0.441988 |
| O             | 4.329452 | -1.2931  | -0.89051 | C | -1.77069 | 0.365018 | -0.29583 |
| H             | 1.138964 | 0.945686 | -0.74048 | C | -2.11942 | -0.99831 | 0.262359 |
| H             | 1.813651 | -0.78682 | 1.256849 | C | 2.574404 | -2.64284 | -0.04165 |
| H             | 3.559137 | -0.74042 | 1.458056 | C | 1.074663 | -2.89837 | 0.001224 |
| H             | 2.271945 | 3.720061 | -0.05704 | C | 0.166418 | -1.97623 | -0.36002 |
| H             | 1.361905 | 3.258634 | -1.48879 | C | -1.33091 | -2.12139 | -0.4635  |
| H             | 2.385656 | -0.76511 | -1.33601 | C | -3.6667  | -1.22918 | 0.24936  |
| H             | 0.253465 | 3.422773 | 1.362134 | C | -4.27972 | -1.26511 | -1.15962 |
| H             | 0.06658  | 4.629164 | 0.092314 | C | -4.07897 | -2.47242 | 1.053997 |
| H             | -1.22947 | 1.406299 | 1.464047 | C | 3.760926 | 1.836236 | -0.44184 |
| H             | -1.85621 | 0.490379 | -1.38981 | C | -2.59518 | 3.646545 | -0.17658 |
| H             | -1.59024 | -0.97468 | 1.29824  | O | -0.80059 | 2.792641 | -1.45352 |
| H             | 2.993676 | -3.1469  | 0.475435 | C | 0.737751 | -4.30727 | 0.434292 |
| H             | 2.86401  | -3.25343 | -1.26445 | O | 4.422278 | -1.26762 | -0.84057 |
| H             | 0.426029 | -1.07547 | -0.97972 | H | 0.928268 | 1.315006 | 1.518204 |
| H             | -1.84048 | -2.0493  | -1.55409 | H | 2.049356 | -0.56988 | 1.421217 |
| H             | -1.76578 | -3.06133 | -0.12123 | H | 3.795493 | -0.34585 | 1.432427 |
| H             | -3.89201 | -0.21018 | 1.09077  | H | 1.784314 | 3.966874 | 1.272849 |
| H             | -5.48616 | -1.1433  | -0.53663 | H | 1.510524 | 3.602589 | -0.41411 |
| H             | -4.21547 | -0.25784 | -1.39168 | H | 2.511273 | -0.85643 | -1.25032 |
| H             | -4.20123 | -2.0298  | -1.36282 | H | -0.54881 | 3.45952  | 1.851339 |
| H             | -4.98598 | -2.31686 | 1.685622 | H | -0.40355 | 4.696289 | 0.610815 |
| H             | -3.7226  | -3.27011 | 0.904519 | H | -1.65782 | 1.39565  | 1.528021 |
| H             | -3.3412  | -2.31007 | 2.344806 | H | -1.69844 | 0.449746 | -1.38095 |
| H             | 3.57509  | 2.925853 | 1.380094 | H | -1.81952 | -1.0133  | 1.320103 |
| H             | 3.466091 | 1.622705 | 2.573337 | H | 3.015249 | -2.9478  | 0.922552 |
| H             | 4.686598 | 1.545486 | 1.312044 | H | 3.014429 | -3.32191 | -0.78726 |
| H             | -3.30125 | 3.335021 | 0.039746 | H | 0.525247 | -0.99032 | -0.6483  |
| H             | -2.34155 | 3.816677 | 1.446351 | H | -1.6034  | -2.09622 | -1.53023 |
| H             | -2.26074 | 4.778984 | -0.04742 | H | -1.65856 | -3.09496 | -0.08985 |
| H             | -2.06183 | 2.660233 | -1.89592 | H | -4.08968 | -0.35583 | 0.765989 |
| H             | 1.133418 | -5.09954 | -0.36786 | H | -5.37217 | -1.33495 | -1.09654 |
| H             | 1.051301 | -4.47115 | 1.272487 | H | -4.03867 | -0.36325 | -1.73323 |
| H             | -0.41529 | -4.54121 | 0.279802 | H | -3.93065 | -2.13281 | -1.73209 |
| H             | 4.60997  | -0.37515 | -1.03671 | H | -5.16922 | -2.51138 | 1.164794 |
| 07_1R4R10R_27 |          |          |          | H | -3.77038 | -3.40231 | 0.561952 |
| C             | 2.689195 | 1.206696 | 0.41521  | H | -3.64055 | -2.4625  | 2.059387 |
| C             | 1.605683 | 1.863908 | 0.864952 | H | 3.511111 | 2.856265 | -0.7446  |
| C             | 2.894295 | -0.24429 | 0.804715 | H | 4.711883 | 1.875535 | 0.108561 |
| C             | 1.22096  | 3.301993 | 0.599972 | H | 3.959387 | 1.2421   | -1.34059 |
| C             | 3.063548 | -1.22631 | -0.38075 | H | -3.31897 | 3.116341 | -0.80284 |
| C             | -0.27225 | 3.62393  | 0.800824 | H | -3.02801 | 3.776802 | 0.821095 |

|               |          |          |          |               |          |          |          |
|---------------|----------|----------|----------|---------------|----------|----------|----------|
| H             | -2.41219 | 4.637363 | -0.6074  | H             | -0.83689 | 2.923058 | 0.670029 |
| H             | -0.04251 | 2.183935 | -1.45161 | H             | -3.35514 | 1.894277 | 1.359258 |
| H             | 1.184731 | -5.04159 | -0.25041 | H             | -4.23235 | 4.127917 | 0.661922 |
| H             | 1.157479 | -4.51641 | 1.427947 | H             | -2.46857 | 4.14664  | 0.639    |
| H             | -0.33561 | -4.50319 | 0.47655  | H             | -3.36931 | 4.003216 | -0.8785  |
| H             | 4.967621 | -1.57768 | -0.09858 | H             | -5.54449 | 2.175088 | 0.145966 |
| 07_1R4R10R_28 |          |          |          | H             | -4.73769 | 1.79392  | -1.38144 |
| C             | 2.505665 | -1.41188 | 0.369976 | H             | -4.84459 | 0.571549 | -0.1017  |
| C             | 1.662144 | -2.24532 | -0.26255 | H             | 1.717415 | -1.72997 | 2.376609 |
| C             | 3.666202 | -0.80129 | -0.39355 | H             | 3.445883 | -1.35608 | 2.313432 |
| C             | 0.585672 | -3.13269 | 0.314699 | H             | 2.259875 | -0.07875 | 2.056544 |
| C             | 3.924092 | 0.711182 | -0.28236 | H             | -4.02744 | -2.29017 | -0.66348 |
| C             | -0.69021 | -3.26078 | -0.55627 | H             | -2.92352 | -2.47031 | -2.04072 |
| C             | -1.92896 | -2.46555 | -0.0859  | H             | -3.29178 | -3.86542 | -1.00653 |
| C             | -1.65341 | -0.98065 | 0.061122 | H             | -2.92839 | -2.43585 | 1.603816 |
| C             | -2.29554 | 0.014434 | -0.5625  | H             | 2.419459 | 3.91741  | 0.591458 |
| C             | -2.10767 | 1.506647 | -0.36021 | H             | 1.102068 | 3.280373 | 1.592253 |
| C             | 2.849954 | 1.603407 | -0.95245 | H             | 2.72677  | 2.60494  | 1.72034  |
| C             | 1.674622 | 2.004768 | -0.08235 | H             | 5.418099 | 1.833727 | -0.87171 |
| C             | 0.44539  | 1.524067 | -0.32374 | 07_1R4R10R_29 |          |          |          |
| C             | -0.82624 | 1.856809 | 0.424763 | C             | 2.464841 | 1.780973 | 0.373896 |
| C             | -3.37361 | 2.160561 | 0.291217 | C             | 1.14495  | 2.020568 | 0.416792 |
| C             | -3.35062 | 3.694939 | 0.175194 | C             | 2.986334 | 0.464855 | 0.912254 |
| C             | -4.69665 | 1.638256 | -0.29505 | C             | 0.387168 | 3.201613 | -0.14144 |
| C             | 2.471625 | -1.13659 | 1.854715 | C             | 3.480732 | -0.49824 | -0.18943 |
| C             | -3.11292 | -2.78584 | -1.00892 | C             | -1.00893 | 3.398828 | 0.478198 |
| O             | -2.21671 | -2.98611 | 1.237237 | C             | -2.13232 | 2.453913 | -0.01796 |
| C             | 1.985096 | 2.999645 | 1.012993 | C             | -1.93085 | 1.002926 | 0.394155 |
| O             | 5.192762 | 0.8919   | -0.93327 | C             | -1.84341 | -0.04847 | -0.42645 |
| H             | 1.812047 | -2.37762 | -1.33665 | C             | -1.78584 | -1.50221 | -0.0077  |
| H             | 3.582748 | -1.04632 | -1.45971 | C             | 3.209018 | -1.97134 | 0.147692 |
| H             | 4.593184 | -1.27837 | -0.0392  | C             | 1.789094 | -2.50234 | 0.006566 |
| H             | 1.015318 | -4.14149 | 0.412388 | C             | 0.759731 | -1.77044 | -0.4593  |
| H             | 0.304084 | -2.83935 | 1.329866 | C             | -0.64174 | -2.24938 | -0.75192 |
| H             | 4.023319 | 0.988839 | 0.777658 | C             | -3.17214 | -2.19047 | -0.25426 |
| H             | -0.47108 | -2.97618 | -1.59274 | C             | -3.16651 | -3.69586 | 0.069765 |
| H             | -1.00022 | -4.31255 | -0.57962 | C             | -4.29269 | -1.51231 | 0.550847 |
| H             | -0.87579 | -0.75626 | 0.787553 | C             | 3.485862 | 2.710657 | -0.23358 |
| H             | -3.05493 | -0.24325 | -1.29771 | C             | -3.4754  | 2.9384   | 0.570736 |
| H             | -2.01677 | 1.950345 | -1.36644 | O             | -2.16407 | 2.601862 | -1.44468 |
| H             | 2.49955  | 1.106008 | -1.86488 | C             | 1.692335 | -3.96025 | 0.401988 |
| H             | 3.360925 | 2.523932 | -1.27759 | O             | 4.893537 | -0.27273 | -0.32954 |
| H             | 0.337865 | 0.809637 | -1.13842 | H             | 0.526082 | 1.255218 | 0.879142 |
| H             | -0.85592 | 1.335991 | 1.394165 | H             | 2.193029 | -0.02884 | 1.482719 |

|   |          |          |          |   |          |          |          |
|---|----------|----------|----------|---|----------|----------|----------|
| H | 3.832252 | 0.618339 | 1.597486 | H | -2.54542 | -4.27839 | -0.61675 |
| H | 0.959279 | 4.126373 | 0.007508 | H | -2.80456 | -3.87651 | 1.090773 |
| H | 0.264644 | 3.097341 | -1.2282  | H | -5.25932 | -1.98204 | 0.334632 |
| H | 2.986274 | -0.25056 | -1.13965 | H | -4.11032 | -1.61123 | 1.629458 |
| H | -0.94784 | 3.319157 | 1.571464 | H | -4.37485 | -0.44596 | 0.325064 |
| H | -1.34511 | 4.419273 | 0.256825 | H | 3.036296 | 3.613593 | -0.6556  |
| H | -1.92739 | 0.836445 | 1.473017 | H | 4.225526 | 3.016341 | 0.519982 |
| H | -1.84282 | 0.127225 | -1.5042  | H | 4.053954 | 2.205959 | -1.02489 |
| H | -1.58527 | -1.55333 | 1.073116 | H | -4.30216 | 2.317589 | 0.204409 |
| H | 3.572284 | -2.1646  | 1.169031 | H | -3.47664 | 2.882937 | 1.665092 |
| H | 3.853289 | -2.58923 | -0.50009 | H | -3.66163 | 3.976225 | 0.274172 |
| H | 0.93549  | -0.72394 | -0.69985 | H | -2.91396 | 2.077682 | -1.77079 |
| H | -0.82607 | -2.13872 | -1.83365 | H | 2.330403 | -4.58267 | -0.24116 |
| H | -0.71976 | -3.31665 | -0.5442  | H | 2.058195 | -4.10214 | 1.428063 |
| H | -3.40717 | -2.07682 | -1.32432 | H | 0.678582 | -4.36194 | 0.353784 |
| H | -4.18388 | -4.09918 | 0.005505 | H | 5.191402 | -0.76865 | -1.10928 |

Table S6. DP4+ results obtained using experimental data of compound **7** *versus* isomers **7a-7d**

| Functional<br>mPVPW91 |      | Solvent?<br>PCl | Basis Set<br>6-311G(d,p) |            |             | Type of Data<br>Shielding Tensors |          |
|-----------------------|------|-----------------|--------------------------|------------|-------------|-----------------------------------|----------|
|                       |      | DP4+            | 0.02%                    | 94.40%     | 5.57%       | 0.00%                             | -        |
| Nuclei                | sp2? | Experimental    | Isomer 1                 | Isomer 2   | Isomer 3    | Isomer 4                          | Isomer 5 |
| C                     |      | 51.96           | 131.79198                | 132.085563 | 133.034999  | 122.489875                        |          |
| C                     | x    | 122.1           | 49.3210835               | 49.544084  | 51.6863656  | 45.5630418                        |          |
| C                     | x    | 141.04          | 39.1342075               | 39.1418062 | 38.0373854  | 33.9795216                        |          |
| C                     |      | 74.2            | 111.267796               | 110.304144 | 109.729583  | 101.166329                        |          |
| C                     |      | 44.21           | 140.136888               | 139.976138 | 140.964259  | 130.921017                        |          |
| C                     |      | 23.66           | 162.305787               | 160.711794 | 161.250456  | 147.916103                        |          |
| C                     | x    | 127.31          | 49.4880538               | 50.5581502 | 51.7661471  | 48.9011985                        |          |
| C                     | x    | 130.05          | 47.9550564               | 47.731788  | 47.2842666  | 41.5763432                        |          |
| C                     |      | 46.88           | 139.662912               | 136.785495 | 139.824217  | 126.669345                        |          |
| C                     |      | 68.82           | 114.002245               | 113.342709 | 113.894237  | 103.664556                        |          |
| C                     |      | 38.96           | 139.34176                | 139.249682 | 139.590288  | 127.46339                         |          |
| C                     | x    | 132.94          | 47.4902038               | 46.5905988 | 46.7588256  | 42.8204473                        |          |
| C                     | x    | 128.47          | 53.6425279               | 52.3861372 | 53.5314434  | 50.954407                         |          |
| C                     |      | 23.68           | 152.565522               | 152.876705 | 151.922136  | 139.943149                        |          |
| C                     |      | 29.13           | 150.388884               | 149.631942 | 150.204653  | 136.649331                        |          |
| C                     |      | 21.15           | 167.398118               | 166.135774 | 165.632923  | 152.919533                        |          |
| C                     |      | 21.85           | 166.196385               | 165.596201 | 169.468369  | 153.323665                        |          |
| C                     |      | 29.17           | 158.788359               | 157.198445 | 157.879622  | 141.713484                        |          |
| C                     |      | 15.32           | 169.150835               | 169.819074 | 169.120236  | 155.246101                        |          |
| C                     |      | 15.09           | 170.552496               | 167.48634  | 169.8699828 | 154.4454298                       |          |
